# Supplementary material
Source: PubMed Central journal article supplement (PMC5912343)
Supplement: NIHMS949254-supplement.pdf [file NIHMS949254-supplement.pdf]

## SUPPLEMENTARY MATERIALS

### Multidimensional chemobehavior analysis of flavonoids and neuroactive compounds in zebrafish

Sean M. Bugel<sup>a</sup>, Robert L. Tanguay<sup>a</sup>

<sup>a</sup>Department of Environmental and Molecular Toxicology, Environmental Health Sciences Center, and the Sinnhuber Aquatic Research Laboratory, Oregon State University, Corvallis, Oregon, 97331, United States

#### Author e-mails:

Sean M. Bugel: Sean.Bugel@oregonstate.edu; sbugel@gmail.com

Robert L. Tanguay: Robert.Tanguay@oregonstate.edu

**Supplementary Materials.** Summary data and statistics for all tested compounds and chemical inhibition studies, including time-course, binned and normalized concentration response curves, mean  $\pm$  SD for normalized activity with 95% confidence intervals, N-values and p-values (two-way repeated measures ANOVA with Tukey's post-hoc,  $p \leq 0.05$ ). Naïve 120 hpf larval zebrafish were exposed (static non-renewal) to multiple concentrations of each chemical individually for 5 hours and locomotor activity was measured immediately following application of treatment. Locomotor activity was binned into 30 min time-bins and normalized to the respective time-bin control group (0.1% DMSO). All excluded treatment groups due to precipitation or acute lethality are noted.

| <u>PAGE</u> | <u>TABLE OF CONTENTS</u>                                               |
|-------------|------------------------------------------------------------------------|
| 3           | <b>I. NEUROACTIVE DRUGS AND TOXICANTS (14 TOTAL)</b>                   |
| 4           | a. Bumetanide                                                          |
| 5           | b. Caffeine                                                            |
| 6           | c. Chlorpyrifos                                                        |
| 7           | d. Dopamine                                                            |
| 8           | e. Epinephrine                                                         |
| 9           | f. Fluoxetine                                                          |
| 10          | g. Imidacloprid                                                        |
| 11          | h. S-(+)-Ketamine                                                      |
| 12          | i. Mecamylamine                                                        |
| 13          | j. (+)-Methamphetamine                                                 |
| 14          | k. Methyllycaconitine                                                  |
| 15          | l. (-)-Nicotine                                                        |
| 16          | m. N-methyl-D-aspartic acid (NMDA)                                     |
| 17          | n. Tricaine mesylate (MS-222)                                          |
| 18          | <b>II. GABA AGONISTS AND POSITIVE ALLOSTERIC MODULATORS (10 TOTAL)</b> |
| 19          | a. Alfaxalone (5 $\alpha$ -pregnan-3 $\alpha$ -ol-11,20-dione)         |
| 20          | b. ( $\pm$ )-Baclofen                                                  |
| 21          | c. Carbamazepine                                                       |
| 22          | d. CGP 13501                                                           |
| 23          | e. Chlormethiazole                                                     |
| 24          | f. Ethanol                                                             |
| 25          | g. gamma-Aminobutyric Acid (GABA)                                      |
| 26          | h. Muscimol                                                            |
| 27          | i. SKF 97541 (CGP 35024)                                               |
| 28          | j. Valproic Acid                                                       |

- 29 **III. GABA ANTAGONISTS AND NEGATIVE ALLOSTERIC MODULATORS (6 TOTAL)**  
30 a. Bicuculline  
31 b. Dehydroisoandrosterone 3-sulfate  
32 c. Pentylentetrazol  
33 d. Picrotoxin  
34 e. Pregnenolone sulfate  
35 f. SCH 50911

- 36 **IV. FLAVONOIDS AND FLAVONOID-LIKE COMPOUNDS (24 TOTAL)**  
37 a. 3'-Hydroxyflavone  
38 b. 6-Hydroxyflavone  
39 c. 7-Hydroxyflavone  
40 d.  $\alpha$ -Naphthoflavone  
41 e.  $\beta$ -Naphthoflavone  
42 f. Apigenin  
43 g. Biochanin A  
44 h. Chrysin  
45 i. Daidzein  
46 j. (S)-Equol  
47 k. Fisetin  
48 l. Flavone  
49 m. Formononetin  
50 n. Galangin  
51 o. Genistein  
52 p. Kaempferol  
53 q. Luteolin  
54 r. Morin  
55 s. Myricetin  
56 t. Naringenin  
57 u. Puerarin  
58 v. Quercetin  
59 w. Quercetin 3- $\beta$ -D glucoside  
60 x. Resveratrol

- 61 **V. PHARMACOLOGICAL INTERVENTION STUDIES**  
62 a. Picrotoxin co-treated with Alfaxalone  
63 b. Picrotoxin co-treated with Chlormethiazole  
64 c. (S)-Equol co-treated with Alfaxalone  
65 d. (S)-Equol co-treated with Chlormethiazole  
66 e. Kaempferol co-treated with Alfaxalone  
67 f. Kaempferol co-treated with Chlormethiazole

# Neuroactive drugs and toxicants

## **14 tested chemicals:**

Bumetanide

Caffeine

Chlorpyrifos

Dopamine Hydrochloride

Epinephrine

Fluoxetine

Imidacloprid

S-(+)-Ketamine

Mecamylamine

(+)-Methamphetamine

Methyllycaconitine

(-)-Nicotine

N-methyl-D-aspartic acid (NMDA)

Tricaine mesylate (MS-222)

**CHEMICAL: Bumetanide**

**Normalized percent activity**

**Time bin (minutes post exposure)**

| [ $\mu$ M] | 1-30         | 31-60         | 61-90         | 91-120        | 121-150      | 151-180      | 181-210      | 211-240      | 241-270      | 271-300       | N  |
|------------|--------------|---------------|---------------|---------------|--------------|--------------|--------------|--------------|--------------|---------------|----|
| 0          | 100 $\pm$ 81 | 100 $\pm$ 75  | 100 $\pm$ 85  | 100 $\pm$ 74  | 100 $\pm$ 77 | 100 $\pm$ 75 | 100 $\pm$ 80 | 100 $\pm$ 76 | 100 $\pm$ 58 | 100 $\pm$ 70  | 15 |
| 1          | 81 $\pm$ 47  | 66 $\pm$ 43   | 63 $\pm$ 49   | 68 $\pm$ 57   | 60 $\pm$ 43  | 64 $\pm$ 48  | 61 $\pm$ 46  | 68 $\pm$ 51  | 65 $\pm$ 37  | 74 $\pm$ 45   | 15 |
| 10         | 74 $\pm$ 75  | 63 $\pm$ 47   | 88 $\pm$ 67   | 116 $\pm$ 103 | 77 $\pm$ 62  | 75 $\pm$ 65  | 100 $\pm$ 90 | 98 $\pm$ 69  | 79 $\pm$ 55  | 94 $\pm$ 58   | 16 |
| 100        | 84 $\pm$ 59  | 63 $\pm$ 40   | 63 $\pm$ 33   | 83 $\pm$ 43   | 80 $\pm$ 46  | 63 $\pm$ 37  | 75 $\pm$ 40  | 78 $\pm$ 42  | 68 $\pm$ 35  | 67 $\pm$ 43   | 16 |
| 1000       | 121 $\pm$ 80 | 128 $\pm$ 149 | 104 $\pm$ 115 | 112 $\pm$ 100 | 96 $\pm$ 82  | 88 $\pm$ 70  | 80 $\pm$ 76  | 81 $\pm$ 61  | 80 $\pm$ 68  | 115 $\pm$ 113 | 16 |

**Mean  $\pm$  standard deviation**

**Normalized percent activity**

**Time bin (minutes post exposure)**

| [ $\mu$ M] | 1-30   | 31-60  | 61-90  | 91-120 | 121-150 | 151-180 | 181-210 | 211-240 | 241-270 | 271-300 |
|------------|--------|--------|--------|--------|---------|---------|---------|---------|---------|---------|
| 0          | 58-142 | 61-139 | 56-144 | 62-138 | 60-140  | 61-139  | 59-141  | 61-139  | 70-130  | 64-136  |
| 1          | 56-105 | 44-88  | 38-88  | 39-97  | 37-82   | 39-89   | 37-85   | 42-94   | 46-84   | 51-97   |
| 10         | 36-111 | 39-86  | 54-121 | 65-168 | 46-108  | 43-108  | 55-145  | 63-132  | 51-106  | 65-123  |
| 100        | 54-113 | 43-84  | 46-80  | 62-105 | 57-103  | 44-81   | 55-95   | 57-99   | 50-85   | 45-88   |
| 1000       | 81-160 | 53-202 | 46-161 | 62-162 | 55-136  | 53-123  | 42-118  | 50-111  | 46-114  | 59-172  |

**95% confidence interval**

**p-values**

**Time bin (minutes post exposure)**

| [ $\mu$ M] | 1-30  | 31-60 | 61-90 | 91-120 | 121-150 | 151-180 | 181-210 | 211-240 | 241-270 | 271-300 |
|------------|-------|-------|-------|--------|---------|---------|---------|---------|---------|---------|
| 1          | 0.996 | 0.802 | 0.807 | 0.740  | 0.611   | 0.618   | 0.792   | 0.875   | 0.770   | 0.892   |
| 10         | 0.833 | 0.716 | 1.000 | 0.996  | 0.909   | 0.678   | 1.000   | 1.000   | 0.841   | 1.000   |
| 100        | 0.999 | 0.750 | 0.965 | 1.000  | 0.998   | 0.685   | 0.998   | 0.997   | 0.878   | 0.749   |
| 1000       | 0.864 | 0.997 | 1.000 | 0.990  | 0.998   | 0.981   | 0.909   | 0.989   | 0.900   | 0.999   |

**Two-way repeated measures ANOVA, Tukey's post-hoc,  $p \leq 0.05$**

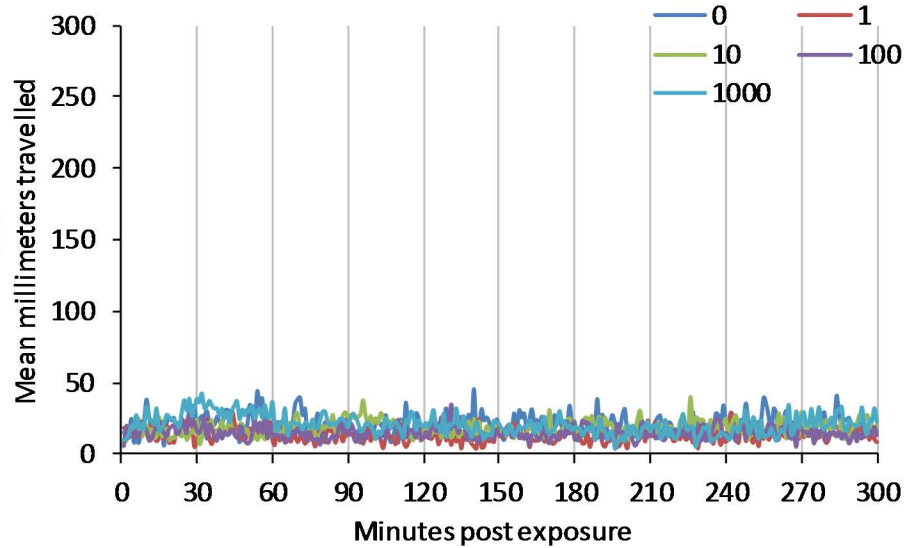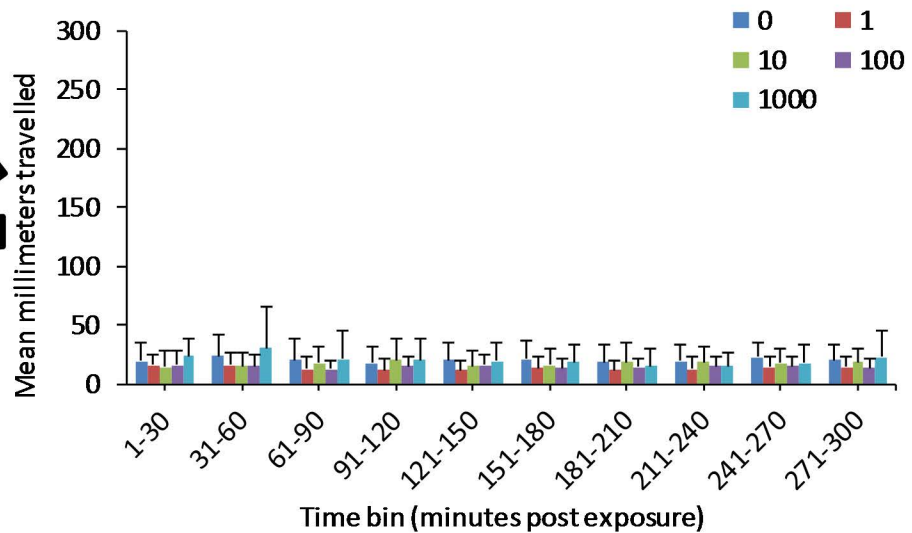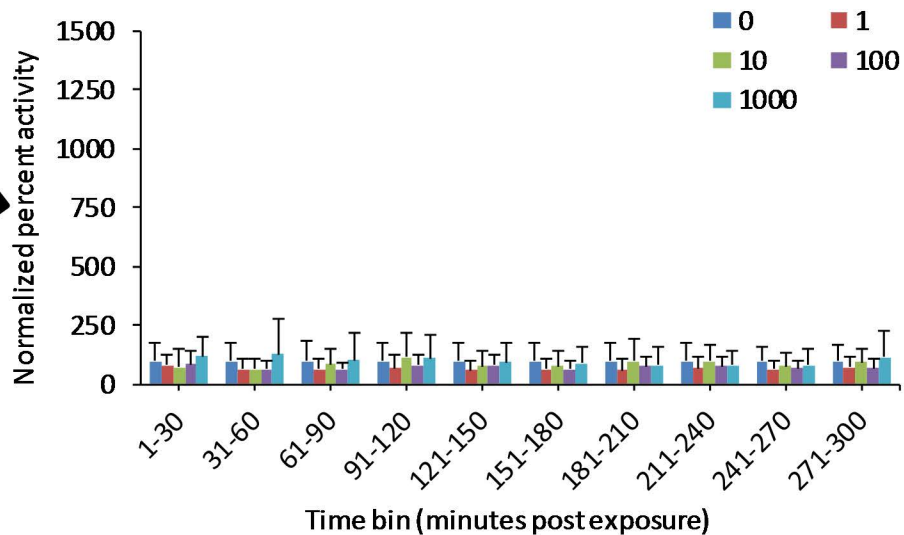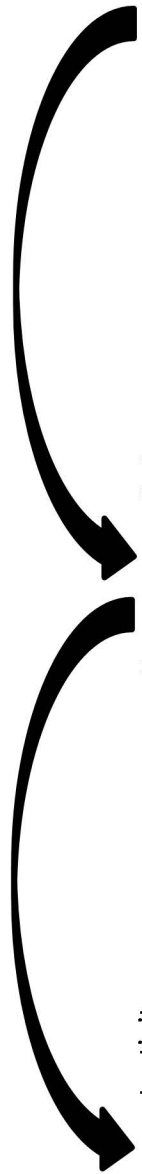

# CHEMICAL: Caffeine

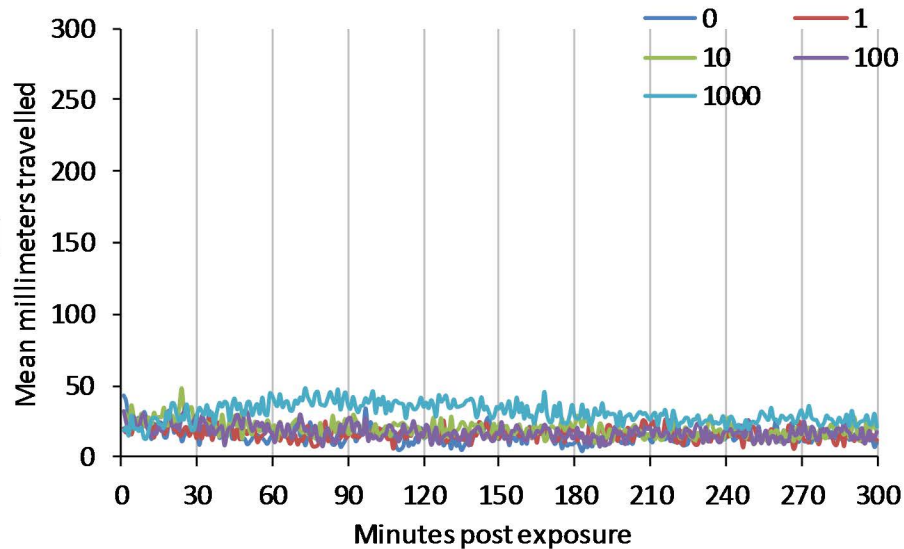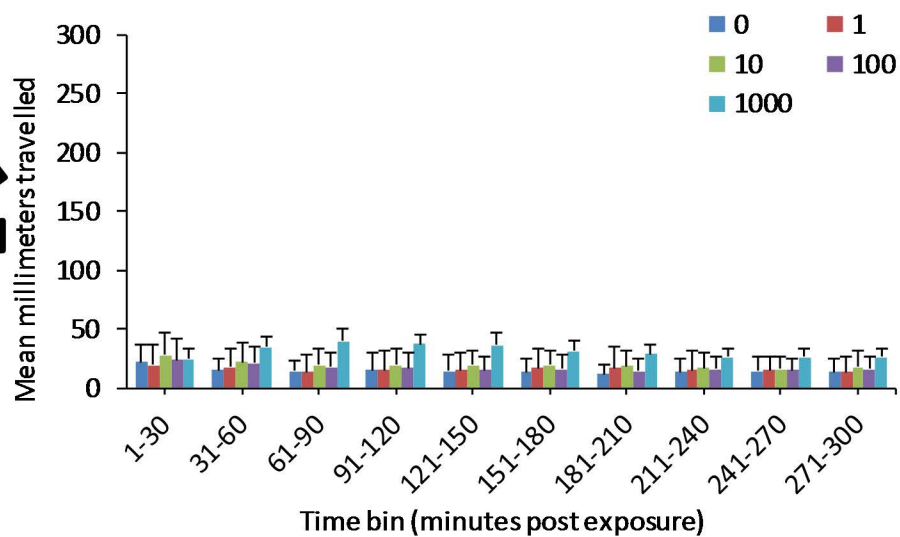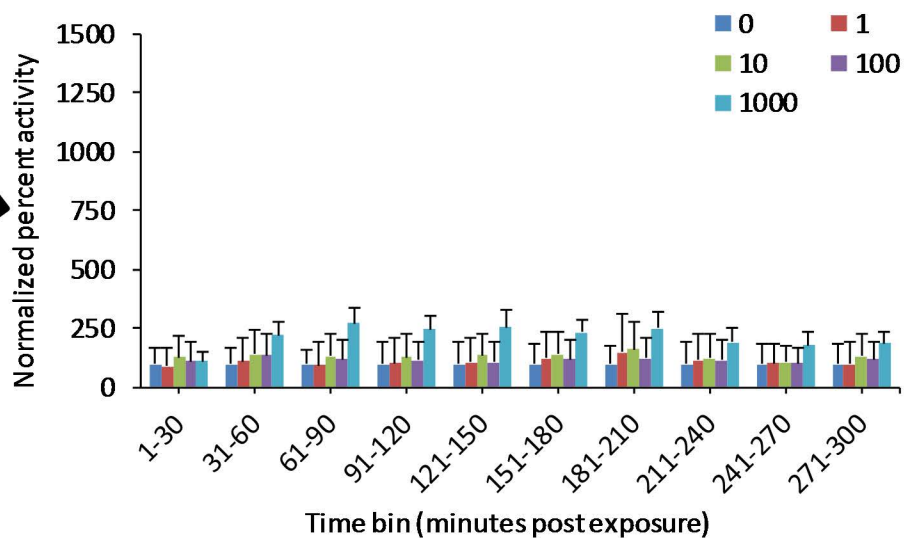

## Normalized percent activity

| [μM] | Time bin (minutes post exposure) |           |          |           |           |           |           |           |          |          | N  |
|------|----------------------------------|-----------|----------|-----------|-----------|-----------|-----------|-----------|----------|----------|----|
|      | 1-30                             | 31-60     | 61-90    | 91-120    | 121-150   | 151-180   | 181-210   | 211-240   | 241-270  | 271-300  |    |
| 0    | 100 ± 67                         | 100 ± 64  | 100 ± 61 | 100 ± 96  | 100 ± 93  | 100 ± 81  | 100 ± 75  | 100 ± 90  | 100 ± 86 | 100 ± 85 | 23 |
| 1    | 90 ± 82                          | 113 ± 101 | 95 ± 100 | 104 ± 108 | 108 ± 102 | 122 ± 118 | 147 ± 162 | 116 ± 115 | 102 ± 84 | 98 ± 98  | 23 |
| 10   | 129 ± 89                         | 139 ± 106 | 131 ± 92 | 130 ± 97  | 134 ± 94  | 140 ± 96  | 160 ± 115 | 125 ± 101 | 107 ± 73 | 132 ± 99 | 24 |
| 100  | 109 ± 85                         | 135 ± 93  | 119 ± 86 | 115 ± 81  | 105 ± 86  | 118 ± 89  | 125 ± 85  | 117 ± 85  | 101 ± 67 | 118 ± 76 | 24 |
| 1000 | 112 ± 43                         | 219 ± 63  | 271 ± 69 | 246 ± 61  | 253 ± 77  | 233 ± 58  | 250 ± 68  | 193 ± 60  | 177 ± 55 | 188 ± 52 | 22 |

## Mean ± standard deviation

## Normalized percent activity

| [μM] | Time bin (minutes post exposure) |         |         |         |         |         |         |         |         |         |
|------|----------------------------------|---------|---------|---------|---------|---------|---------|---------|---------|---------|
|      | 1-30                             | 31-60   | 61-90   | 91-120  | 121-150 | 151-180 | 181-210 | 211-240 | 241-270 | 271-300 |
| 0    | 72-128                           | 73-127  | 74-126  | 60-140  | 61-139  | 66-134  | 69-131  | 62-138  | 64-136  | 64-136  |
| 1    | 55-124                           | 71-155  | 53-137  | 59-148  | 66-151  | 72-171  | 80-215  | 68-164  | 67-137  | 57-139  |
| 10   | 93-165                           | 96-182  | 93-169  | 90-170  | 96-173  | 101-179 | 113-207 | 84-166  | 77-137  | 91-172  |
| 100  | 74-144                           | 97-173  | 84-154  | 82-149  | 70-140  | 81-154  | 91-160  | 83-152  | 74-129  | 87-149  |
| 1000 | 94-130                           | 192-246 | 242-300 | 219-272 | 220-286 | 208-258 | 221-279 | 167-219 | 154-201 | 166-210 |

## 95% confidence interval

## p-values

| [μM] | Time bin (minutes post exposure) |       |       |        |         |         |         |         |         |         |
|------|----------------------------------|-------|-------|--------|---------|---------|---------|---------|---------|---------|
|      | 1-30                             | 31-60 | 61-90 | 91-120 | 121-150 | 151-180 | 181-210 | 211-240 | 241-270 | 271-300 |
| 1    | 0.777                            | 1.000 | 0.929 | 1.000  | 0.998   | 0.997   | 0.924   | 0.998   | 1.000   | 0.999   |
| 10   | 0.773                            | 0.818 | 0.900 | 0.753  | 0.520   | 0.544   | 0.397   | 0.895   | 0.983   | 0.773   |
| 100  | 0.998                            | 0.703 | 0.987 | 0.881  | 0.994   | 0.965   | 0.914   | 0.931   | 0.987   | 0.843   |
| 1000 | 0.802                            | 0.001 | 0.001 | 0.001  | 0.001   | 0.001   | 0.001   | 0.002   | 0.005   | 0.002   |

Two-way repeated measures ANOVA, Tukey's post-hoc,  $p \leq 0.05$

# CHEMICAL: Chlorpyrifos

## Normalized percent activity

## Time bin (minutes post exposure)

| [ $\mu$ M] | 1-30         | 31-60         | 61-90          | 91-120        | 121-150       | 151-180       | 181-210       | 211-240       | 241-270       | 271-300       | N  |
|------------|--------------|---------------|----------------|---------------|---------------|---------------|---------------|---------------|---------------|---------------|----|
| 0          | 100 $\pm$ 77 | 100 $\pm$ 85  | 100 $\pm$ 84   | 100 $\pm$ 78  | 100 $\pm$ 75  | 100 $\pm$ 65  | 100 $\pm$ 81  | 100 $\pm$ 80  | 100 $\pm$ 79  | 100 $\pm$ 67  | 21 |
| 1          | 81 $\pm$ 53  | 117 $\pm$ 68  | 137 $\pm$ 88   | 169 $\pm$ 96  | 146 $\pm$ 66  | 166 $\pm$ 73  | 144 $\pm$ 75  | 128 $\pm$ 60  | 147 $\pm$ 65  | 165 $\pm$ 56  | 21 |
| 10         | 422 $\pm$ 98 | 845 $\pm$ 181 | 1067 $\pm$ 354 | 911 $\pm$ 400 | 710 $\pm$ 351 | 591 $\pm$ 388 | 316 $\pm$ 243 | 233 $\pm$ 176 | 240 $\pm$ 214 | 239 $\pm$ 243 | 18 |
| 100        | 323 $\pm$ 72 | 433 $\pm$ 142 | 344 $\pm$ 190  | 148 $\pm$ 143 | 91 $\pm$ 86   | 72 $\pm$ 98   | 47 $\pm$ 79   | 28 $\pm$ 50   | 16 $\pm$ 37   | 12 $\pm$ 27   | 19 |

## Mean $\pm$ standard deviation

<sup>‡</sup>Exclusion: lethality observed in 1000  $\mu$ M treatment group (20 of 20 animals)

## Normalized percent activity

## Time bin (minutes post exposure)

| [ $\mu$ M] | 1-30    | 31-60   | 61-90    | 91-120   | 121-150 | 151-180 | 181-210 | 211-240 | 241-270 | 271-300 |
|------------|---------|---------|----------|----------|---------|---------|---------|---------|---------|---------|
| 0          | 66-134  | 63-137  | 63-137   | 66-134   | 67-133  | 72-128  | 65-135  | 65-135  | 66-134  | 71-129  |
| 1          | 58-105  | 87-147  | 99-176   | 127-211  | 117-174 | 134-198 | 112-177 | 102-164 | 119-175 | 140-189 |
| 10         | 376-468 | 759-930 | 900-1233 | 722-1099 | 544-875 | 408-774 | 202-431 | 150-316 | 139-341 | 124-353 |
| 100        | 290-356 | 367-498 | 257-431  | 83-214   | 52-131  | 27-117  | 11-84   | 5-51    | -1-33   | -1-24   |

## 95% confidence interval

## p-values

## Time bin (minutes post exposure)

| [ $\mu$ M] | 1-30  | 31-60 | 61-90 | 91-120 | 121-150 | 151-180 | 181-210 | 211-240 | 241-270 | 271-300 |
|------------|-------|-------|-------|--------|---------|---------|---------|---------|---------|---------|
| 1          | 0.785 | 0.815 | 0.513 | 0.207  | 0.339   | 0.184   | 0.351   | 0.556   | 0.178   | 0.117   |
| 10         | 0.001 | 0.001 | 0.001 | 0.001  | 0.001   | 0.001   | 0.013   | 0.232   | 0.372   | 0.780   |
| 100        | 0.001 | 0.001 | 0.001 | 0.954  | 0.417   | 0.023   | 0.001   | 0.001   | 0.001   | 0.001   |

Two-way repeated measures ANOVA, Tukey's post-hoc,  $p \leq 0.05$

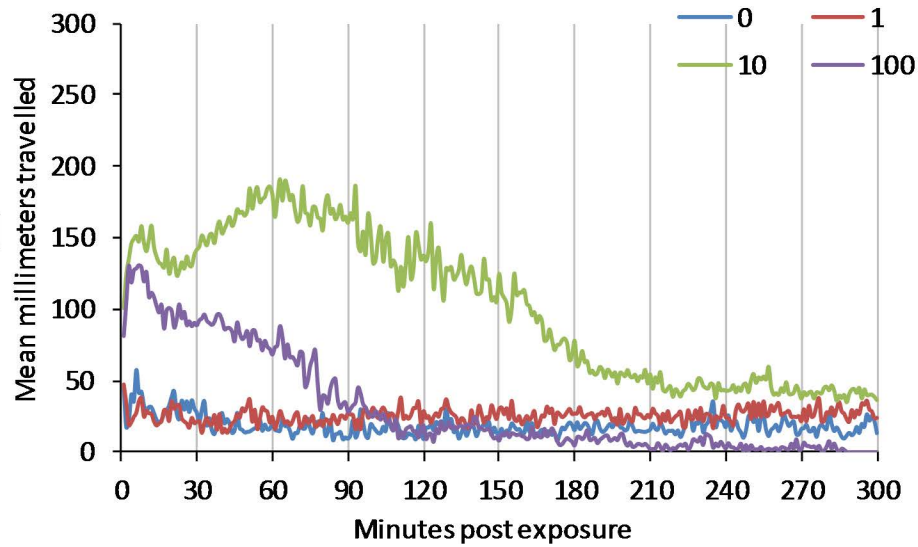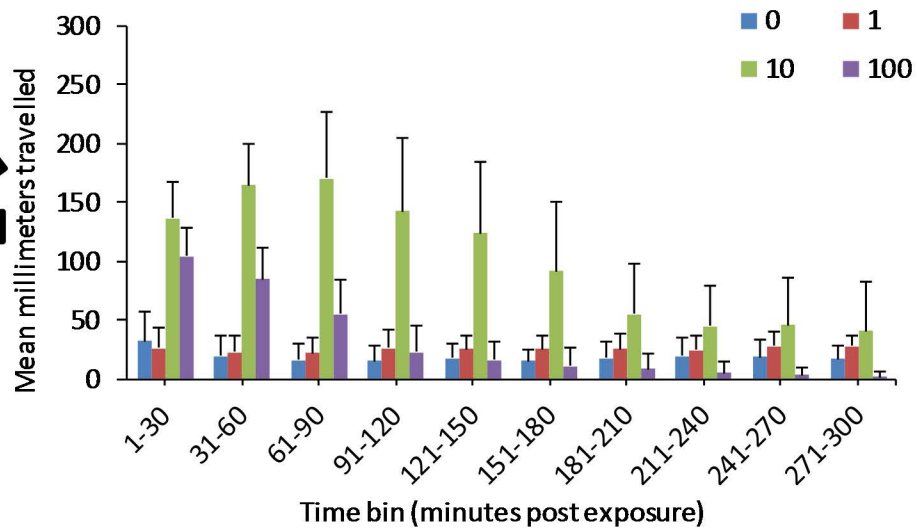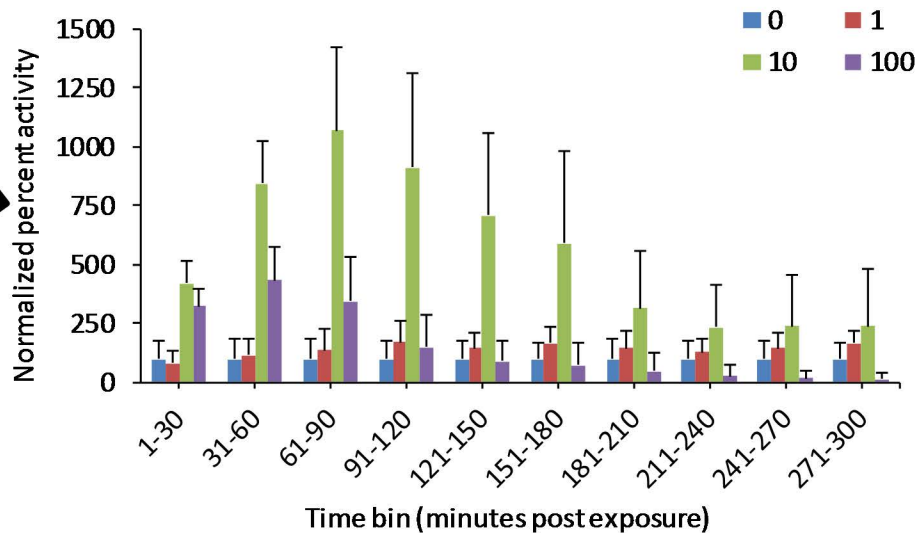

# CHEMICAL: Dopamine

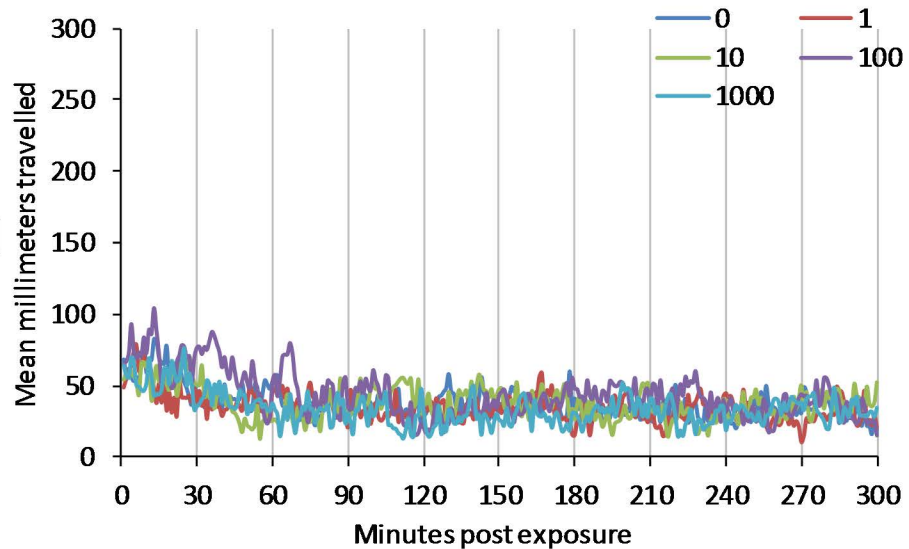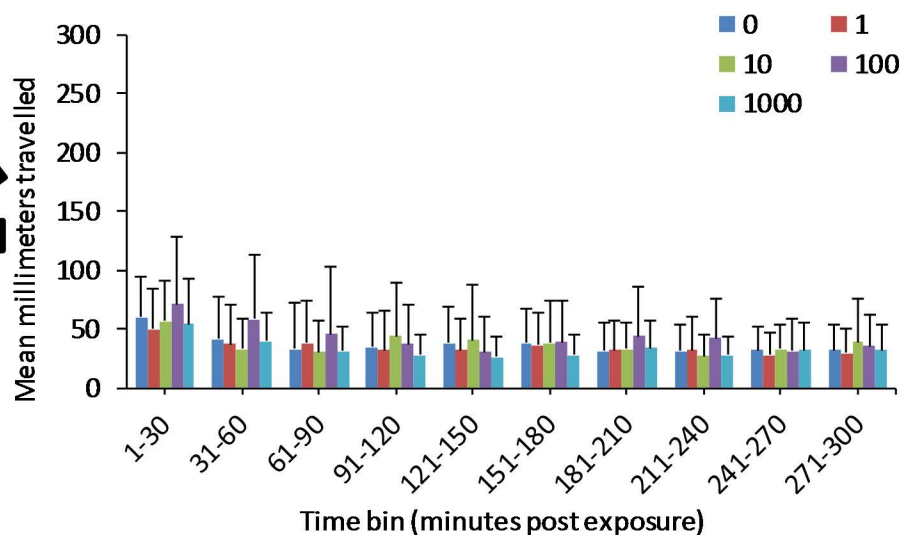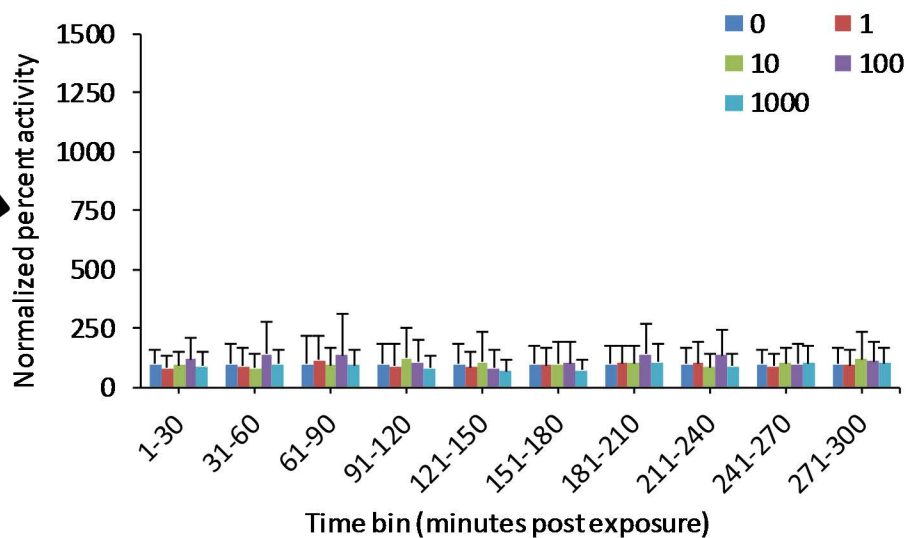

## Normalized percent activity

| [μM] | Time bin (minutes post exposure) |           |           |           |           |          |           |           |          |           | N  |
|------|----------------------------------|-----------|-----------|-----------|-----------|----------|-----------|-----------|----------|-----------|----|
|      | 1-30                             | 31-60     | 61-90     | 91-120    | 121-150   | 151-180  | 181-210   | 211-240   | 241-270  | 271-300   |    |
| 0    | 100 ± 58                         | 100 ± 88  | 100 ± 119 | 100 ± 84  | 100 ± 81  | 100 ± 74 | 100 ± 75  | 100 ± 72  | 100 ± 60 | 100 ± 65  | 24 |
| 1    | 83 ± 55                          | 90 ± 81   | 114 ± 108 | 91 ± 96   | 84 ± 70   | 94 ± 72  | 102 ± 79  | 102 ± 93  | 88 ± 57  | 93 ± 64   | 21 |
| 10   | 94 ± 57                          | 80 ± 62   | 92 ± 78   | 125 ± 128 | 107 ± 125 | 100 ± 93 | 104 ± 73  | 87 ± 56   | 103 ± 63 | 121 ± 114 | 24 |
| 100  | 117 ± 96                         | 142 ± 132 | 138 ± 173 | 107 ± 93  | 79 ± 81   | 101 ± 93 | 140 ± 132 | 135 ± 109 | 98 ± 89  | 110 ± 86  | 20 |
| 1000 | 90 ± 63                          | 97 ± 59   | 93 ± 63   | 79 ± 52   | 69 ± 47   | 74 ± 46  | 108 ± 74  | 88 ± 52   | 102 ± 73 | 101 ± 68  | 22 |

## Mean ± standard deviation

## Normalized percent activity

| [μM] | Time bin (minutes post exposure) |        |        |        |         |         |         |         |         |         |
|------|----------------------------------|--------|--------|--------|---------|---------|---------|---------|---------|---------|
|      | 1-30                             | 31-60  | 61-90  | 91-120 | 121-150 | 151-180 | 181-210 | 211-240 | 241-270 | 271-300 |
| 0    | 76-124                           | 64-136 | 51-149 | 66-134 | 67-133  | 70-130  | 70-130  | 70-130  | 75-125  | 74-126  |
| 1    | 59-107                           | 55-125 | 66-161 | 49-133 | 53-114  | 63-126  | 68-136  | 61-142  | 63-113  | 65-121  |
| 10   | 71-118                           | 55-105 | 61-124 | 72-177 | 55-158  | 62-138  | 74-134  | 64-110  | 77-129  | 74-167  |
| 100  | 74-161                           | 83-201 | 61-25  | 65-148 | 43-115  | 60-143  | 81-199  | 86-184  | 58-137  | 71-148  |
| 1000 | 63-117                           | 71-122 | 66-120 | 57-101 | 49-89   | 54-94   | 76-140  | 66-110  | 71-133  | 73-130  |

## 95% confidence interval

## p-values

| [μM] | Time bin (minutes post exposure) |       |       |        |         |         |         |         |         |         |
|------|----------------------------------|-------|-------|--------|---------|---------|---------|---------|---------|---------|
|      | 1-30                             | 31-60 | 61-90 | 91-120 | 121-150 | 151-180 | 181-210 | 211-240 | 241-270 | 271-300 |
| 1    | 0.892                            | 1.000 | 0.949 | 0.965  | 0.924   | 0.956   | 0.999   | 0.992   | 0.953   | 0.997   |
| 10   | 0.991                            | 0.990 | 1.000 | 0.995  | 0.968   | 0.994   | 0.999   | 0.957   | 1.000   | 0.972   |
| 100  | 0.998                            | 0.645 | 0.729 | 1.000  | 0.777   | 1.000   | 0.785   | 0.883   | 0.971   | 0.999   |
| 1000 | 0.891                            | 0.981 | 0.995 | 0.980  | 0.658   | 0.663   | 0.999   | 0.972   | 0.997   | 1.000   |

Two-way repeated measures ANOVA, Tukey's post-hoc,  $p \leq 0.05$

# CHEMICAL: Epinephrine

**Normalized percent activity**

|            | Time bin (minutes post exposure) |               |               |               |              |               |              |              |              |              |    |
|------------|----------------------------------|---------------|---------------|---------------|--------------|---------------|--------------|--------------|--------------|--------------|----|
| [ $\mu$ M] | 1-30                             | 31-60         | 61-90         | 91-120        | 121-150      | 151-180       | 181-210      | 211-240      | 241-270      | 271-300      | N  |
| 0          | 100 $\pm$ 105                    | 100 $\pm$ 94  | 100 $\pm$ 92  | 100 $\pm$ 69  | 100 $\pm$ 84 | 100 $\pm$ 111 | 100 $\pm$ 70 | 100 $\pm$ 64 | 100 $\pm$ 54 | 100 $\pm$ 47 | 21 |
| 1          | 100 $\pm$ 93                     | 100 $\pm$ 102 | 113 $\pm$ 132 | 114 $\pm$ 107 | 82 $\pm$ 78  | 103 $\pm$ 63  | 75 $\pm$ 41  | 102 $\pm$ 66 | 88 $\pm$ 52  | 95 $\pm$ 60  | 24 |
| 10         | 127 $\pm$ 86                     | 145 $\pm$ 113 | 126 $\pm$ 140 | 85 $\pm$ 75   | 97 $\pm$ 86  | 111 $\pm$ 80  | 82 $\pm$ 56  | 115 $\pm$ 72 | 94 $\pm$ 71  | 93 $\pm$ 68  | 23 |
| 100        | 86 $\pm$ 59                      | 96 $\pm$ 60   | 118 $\pm$ 81  | 117 $\pm$ 80  | 107 $\pm$ 55 | 128 $\pm$ 68  | 102 $\pm$ 52 | 132 $\pm$ 78 | 132 $\pm$ 82 | 133 $\pm$ 76 | 23 |
| 1000       | 98 $\pm$ 73                      | 83 $\pm$ 77   | 93 $\pm$ 81   | 91 $\pm$ 86   | 76 $\pm$ 71  | 95 $\pm$ 66   | 62 $\pm$ 42  | 100 $\pm$ 65 | 89 $\pm$ 77  | 110 $\pm$ 98 | 23 |

Mean  $\pm$  standard deviation

**Normalized percent activity**

|            | Time bin (minutes post exposure) |        |        |        |         |         |         |         |         |         |
|------------|----------------------------------|--------|--------|--------|---------|---------|---------|---------|---------|---------|
| [ $\mu$ M] | 1-30                             | 31-60  | 61-90  | 91-120 | 121-150 | 151-180 | 181-210 | 211-240 | 241-270 | 271-300 |
| 0          | 54-146                           | 59-141 | 60-140 | 70-130 | 63-137  | 52-148  | 69-131  | 72-128  | 76-124  | 79-121  |
| 1          | 62-138                           | 58-142 | 59-167 | 71-158 | 50-114  | 78-129  | 58-92   | 75-129  | 67-109  | 70-119  |
| 10         | 91-163                           | 98-192 | 67-184 | 54-116 | 61-133  | 78-145  | 58-105  | 85-145  | 65-124  | 65-121  |
| 100        | 61-111                           | 71-120 | 84-152 | 84-151 | 85-130  | 100-156 | 80-123  | 99-164  | 98-167  | 101-164 |
| 1000       | 67-128                           | 51-115 | 59-127 | 55-127 | 46-105  | 68-123  | 44-79   | 73-128  | 57-122  | 69-151  |

95% confidence interval

**p-values**

|            | Time bin (minutes post exposure) |       |       |        |         |         |         |         |         |         |
|------------|----------------------------------|-------|-------|--------|---------|---------|---------|---------|---------|---------|
| [ $\mu$ M] | 1-30                             | 31-60 | 61-90 | 91-120 | 121-150 | 151-180 | 181-210 | 211-240 | 241-270 | 271-300 |
| 1          | 0.983                            | 1.000 | 1.000 | 1.000  | 0.873   | 0.916   | 0.900   | 1.000   | 0.972   | 0.977   |
| 10         | 0.369                            | 0.853 | 1.000 | 0.795  | 0.989   | 0.977   | 0.825   | 0.985   | 0.905   | 0.940   |
| 100        | 0.997                            | 0.985 | 0.888 | 0.983  | 0.936   | 0.411   | 0.997   | 0.733   | 0.848   | 0.902   |
| 1000       | 0.980                            | 0.860 | 1.000 | 0.918  | 0.818   | 0.996   | 0.288   | 1.000   | 0.850   | 0.987   |

Two-way repeated measures ANOVA, Tukey's post-hoc,  $p \leq 0.05$

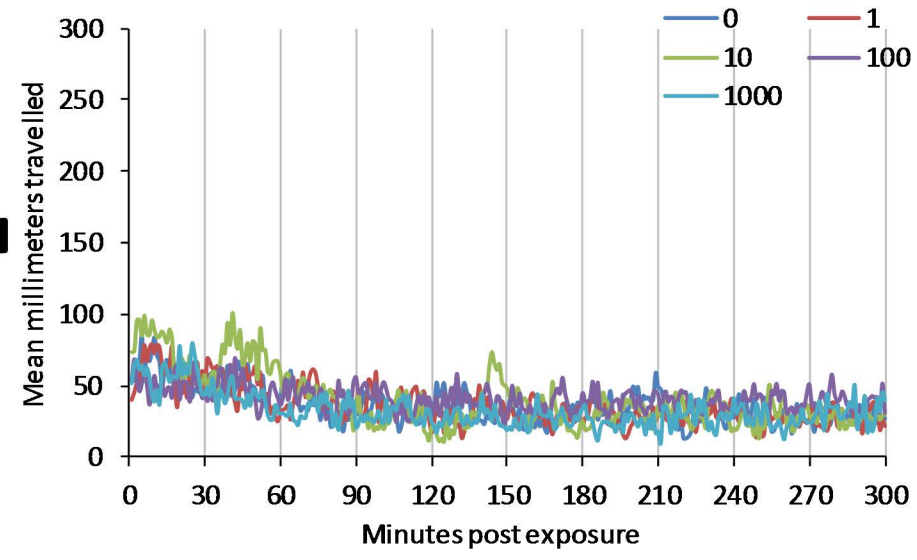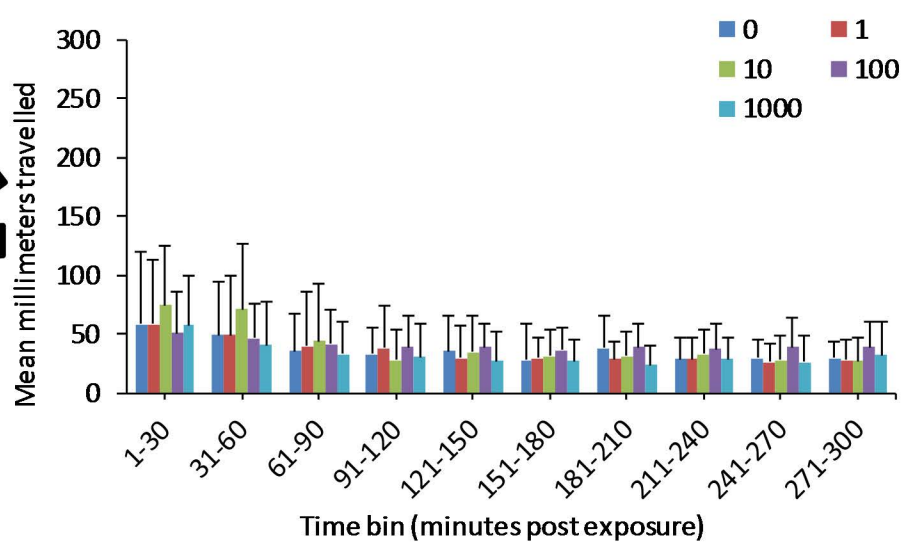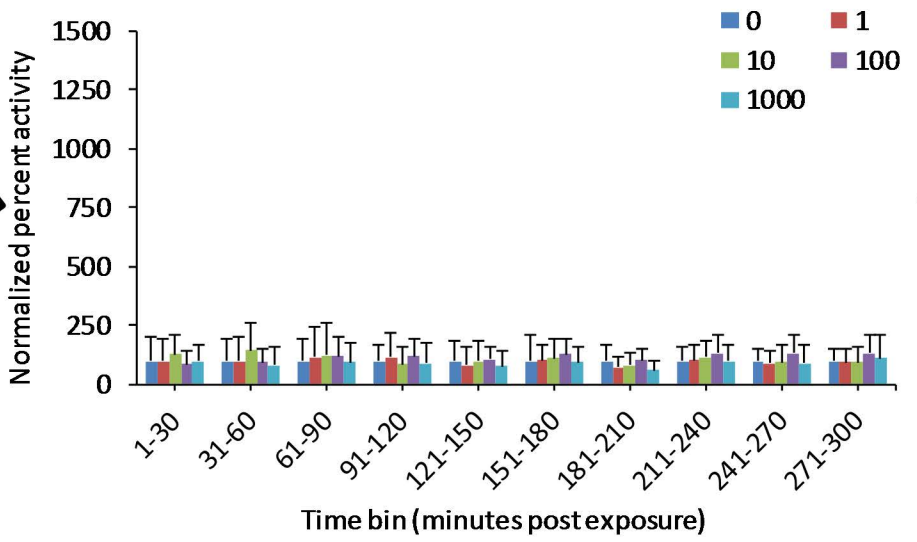



# CHEMICAL: Fluoxetine

## Normalized percent activity

## Time bin (minutes post exposure)

| [ $\mu$ M] | 1-30          | 31-60         | 61-90         | 91-120       | 121-150      | 151-180      | 181-210       | 211-240       | 241-270       | 271-300       | N  |
|------------|---------------|---------------|---------------|--------------|--------------|--------------|---------------|---------------|---------------|---------------|----|
| 0          | 100 $\pm$ 107 | 100 $\pm$ 127 | 100 $\pm$ 108 | 100 $\pm$ 16 | 100 $\pm$ 89 | 100 $\pm$ 87 | 100 $\pm$ 83  | 100 $\pm$ 85  | 100 $\pm$ 71  | 100 $\pm$ 124 | 16 |
| 1          | 16 $\pm$ 25   | 14 $\pm$ 19   | 10 $\pm$ 15   | 13 $\pm$ 20  | 13 $\pm$ 19  | 19 $\pm$ 43  | 27 $\pm$ 50   | 41 $\pm$ 102  | 15 $\pm$ 22   | 11 $\pm$ 28   | 16 |
| 10         | 21 $\pm$ 38   | 21 $\pm$ 27   | 10 $\pm$ 10   | 17 $\pm$ 33  | 25 $\pm$ 40  | 81 $\pm$ 100 | 204 $\pm$ 145 | 251 $\pm$ 213 | 219 $\pm$ 172 | 197 $\pm$ 153 | 16 |

## Mean $\pm$ standard deviation

<sup>‡</sup>Exclusion: lethality observed in 100  $\mu$ M treatment group (16 of 16 animals)

<sup>‡</sup>Exclusion: lethality observed in 1000  $\mu$ M treatment group (16 of 16 animals)

## Normalized percent activity

## Time bin (minutes post exposure)

| [ $\mu$ M] | 1-30   | 31-60  | 61-90  | 91-120 | 121-150 | 151-180 | 181-210 | 211-240 | 241-270 | 271-300 |
|------------|--------|--------|--------|--------|---------|---------|---------|---------|---------|---------|
| 0          | 47-153 | 36-164 | 46-154 | 42-158 | 55-145  | 56-144  | 59-141  | 57-143  | 65-135  | 38-162  |
| 1          | 4-29   | 4-23   | 2-17   | 3-23   | 4-23    | -2-41   | 2-52    | -10-92  | 4-26    | -3-25   |
| 10         | 2-39   | 8-35   | 5-15   | 1-34   | 5-45    | 31-131  | 132-277 | 144-357 | 133-305 | 121-274 |

## 95% confidence interval

## p-values

## Time bin (minutes post exposure)

| [ $\mu$ M] | 1-30  | 31-60 | 61-90 | 91-120 | 121-150 | 151-180 | 181-210 | 211-240 | 241-270 | 271-300 |
|------------|-------|-------|-------|--------|---------|---------|---------|---------|---------|---------|
| 1          | 0.002 | 0.001 | 0.001 | 0.001  | 0.001   | 0.001   | 0.002   | 0.001   | 0.001   | 0.001   |
| 10         | 0.001 | 0.015 | 0.001 | 0.002  | 0.006   | 0.368   | 0.232   | 0.250   | 0.199   | 0.107   |

Two-way repeated measures ANOVA, Tukey's post-hoc,  $p \leq 0.05$

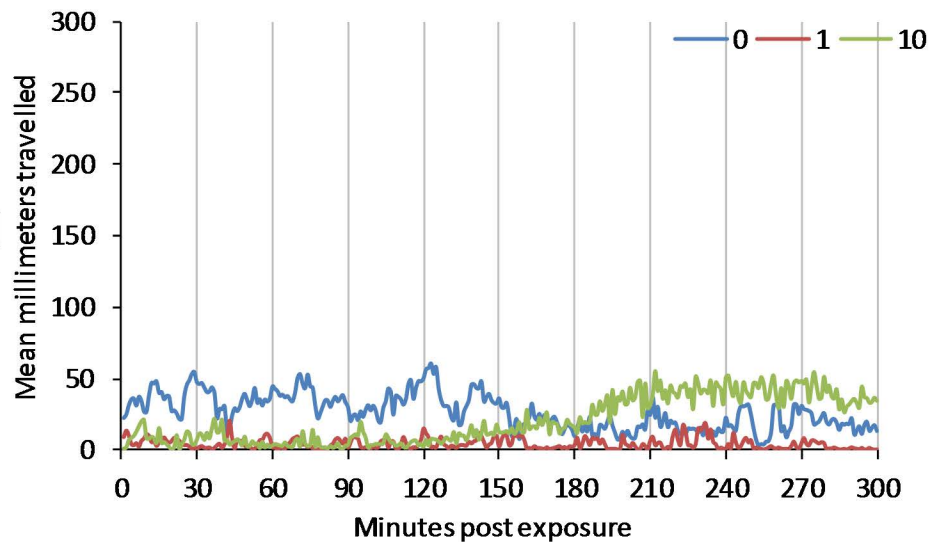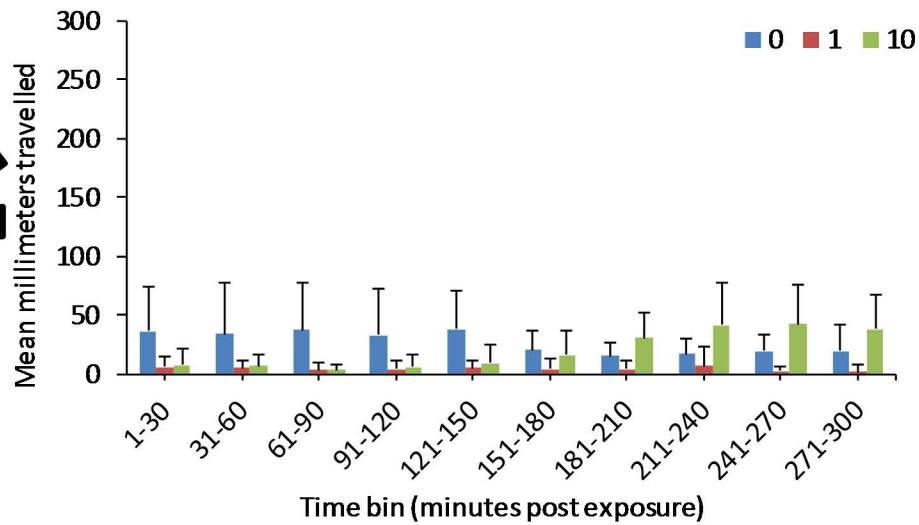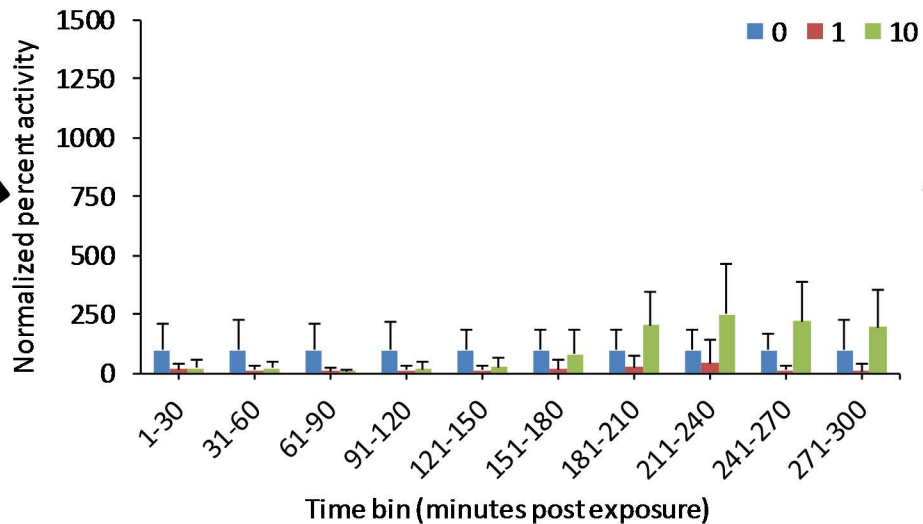

# CHEMICAL: Imidacloprid

## Normalized percent activity

## Time bin (minutes post exposure)

| [ $\mu\text{M}$ ] | 1-30          | 31-60         | 61-90         | 91-120        | 121-150       | 151-180       | 181-210       | 211-240       | 241-270       | 271-300       | N  |
|-------------------|---------------|---------------|---------------|---------------|---------------|---------------|---------------|---------------|---------------|---------------|----|
| 0                 | 100 $\pm$ 75  | 100 $\pm$ 116 | 100 $\pm$ 112 | 100 $\pm$ 88  | 100 $\pm$ 101 | 100 $\pm$ 84  | 100 $\pm$ 83  | 100 $\pm$ 100 | 100 $\pm$ 100 | 100 $\pm$ 128 | 16 |
| 1                 | 242 $\pm$ 229 | 287 $\pm$ 341 | 145 $\pm$ 125 | 154 $\pm$ 147 | 123 $\pm$ 148 | 127 $\pm$ 101 | 170 $\pm$ 224 | 101 $\pm$ 68  | 131 $\pm$ 154 | 118 $\pm$ 121 | 16 |
| 10                | 266 $\pm$ 177 | 159 $\pm$ 113 | 129 $\pm$ 139 | 149 $\pm$ 146 | 149 $\pm$ 174 | 157 $\pm$ 134 | 116 $\pm$ 112 | 112 $\pm$ 96  | 139 $\pm$ 132 | 125 $\pm$ 107 | 16 |
| 100               | 217 $\pm$ 228 | 156 $\pm$ 130 | 46 $\pm$ 51   | 90 $\pm$ 99   | 86 $\pm$ 149  | 85 $\pm$ 86   | 101 $\pm$ 171 | 47 $\pm$ 44   | 81 $\pm$ 81   | 87 $\pm$ 112  | 16 |
| 1000              | 142 $\pm$ 145 | 96 $\pm$ 113  | 23 $\pm$ 32   | 50 $\pm$ 48   | 61 $\pm$ 79   | 40 $\pm$ 46   | 59 $\pm$ 60   | 49 $\pm$ 37   | 38 $\pm$ 37   | 51 $\pm$ 57   | 16 |

## Mean $\pm$ standard deviation

## Normalized percent activity

## Time bin (minutes post exposure)

| [ $\mu\text{M}$ ] | 1-30    | 31-60   | 61-90  | 91-120 | 121-150 | 151-180 | 181-210 | 211-240 | 241-270 | 271-300 |
|-------------------|---------|---------|--------|--------|---------|---------|---------|---------|---------|---------|
| 0                 | 63-137  | 42-158  | 44-156 | 56-144 | 50-150  | 58-142  | 59-141  | 50-150  | 50-150  | 36-164  |
| 1                 | 128-357 | 117-458 | 82-207 | 80-228 | 49-197  | 77-178  | 58-282  | 67-135  | 54-207  | 58-179  |
| 10                | 178-355 | 102-215 | 59-198 | 76-222 | 62-236  | 90-223  | 60-172  | 64-160  | 73-205  | 72-179  |
| 100               | 103-331 | 91-221  | 20-72  | 40-139 | 12-161  | 41-128  | 16-187  | 25-69   | 40-121  | 31-143  |
| 1000              | 69-214  | 39-152  | 7-38   | 26-74  | 22-101  | 17-63   | 29-89   | 30-68   | 20-57   | 23-80   |

## 95% confidence interval

## p-values

## Time bin (minutes post exposure)

| [ $\mu\text{M}$ ] | 1-30  | 31-60 | 61-90 | 91-120 | 121-150 | 151-180 | 181-210 | 211-240 | 241-270 | 271-300 |
|-------------------|-------|-------|-------|--------|---------|---------|---------|---------|---------|---------|
| 1                 | 0.220 | 0.078 | 0.746 | 0.962  | 1.000   | 0.979   | 0.991   | 0.972   | 0.999   | 0.975   |
| 10                | 0.035 | 0.347 | 0.897 | 1.000  | 1.000   | 0.840   | 1.000   | 0.985   | 0.959   | 0.911   |
| 100               | 0.435 | 0.497 | 0.466 | 0.912  | 0.839   | 0.981   | 0.853   | 0.556   | 0.981   | 0.998   |
| 1000              | 0.988 | 0.997 | 0.007 | 0.414  | 0.379   | 0.057   | 0.440   | 0.611   | 0.168   | 0.461   |

Two-way repeated measures ANOVA, Tukey's post-hoc,  $p \leq 0.05$

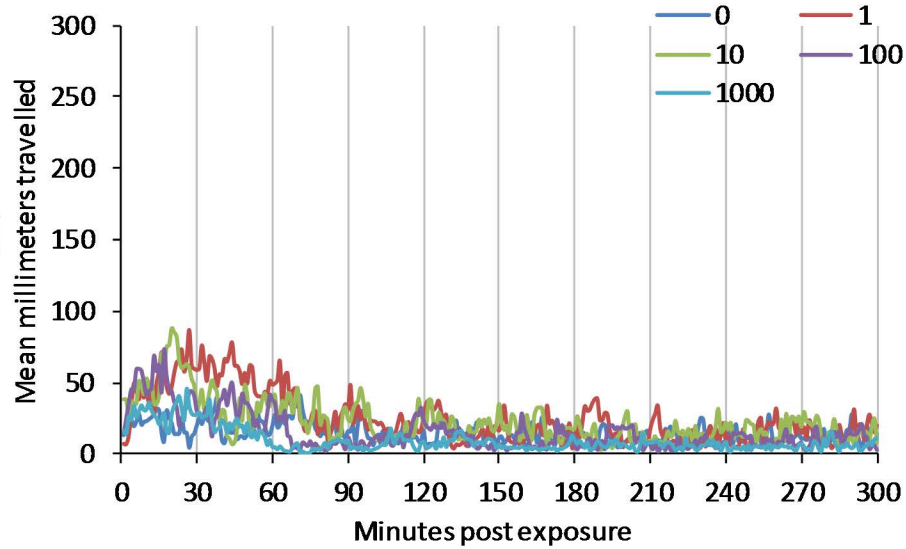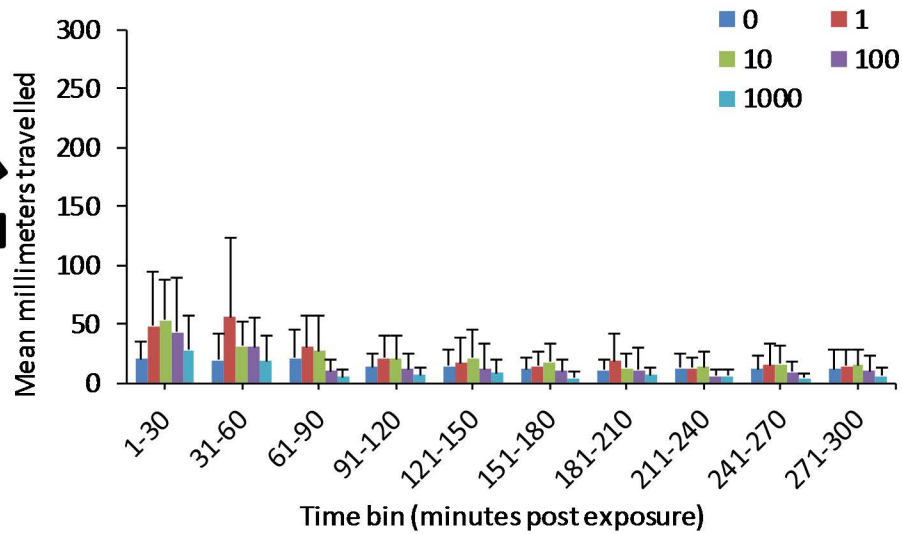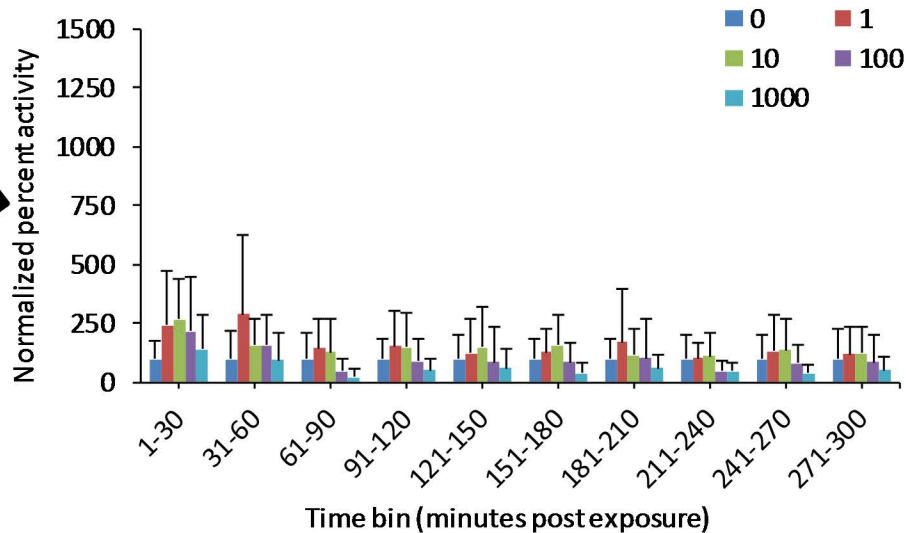

# CHEMICAL: (S)-(+)-Ketamine

## Normalized percent activity

## Time bin (minutes post exposure)

| [ $\mu$ M] | 1-30          | 31-60         | 61-90         | 91-120        | 121-150       | 151-180       | 181-210       | 211-240       | 241-270       | 271-300       | N  |
|------------|---------------|---------------|---------------|---------------|---------------|---------------|---------------|---------------|---------------|---------------|----|
| 0          | 100 $\pm$ 106 | 100 $\pm$ 148 | 100 $\pm$ 119 | 100 $\pm$ 106 | 100 $\pm$ 123 | 100 $\pm$ 112 | 100 $\pm$ 144 | 100 $\pm$ 125 | 100 $\pm$ 115 | 100 $\pm$ 149 | 16 |
| 1          | 65 $\pm$ 103  | 61 $\pm$ 80   | 52 $\pm$ 53   | 100 $\pm$ 186 | 55 $\pm$ 67   | 66 $\pm$ 66   | 57 $\pm$ 69   | 43 $\pm$ 37   | 57 $\pm$ 49   | 37 $\pm$ 45   | 16 |
| 10         | 25 $\pm$ 44   | 21 $\pm$ 30   | 37 $\pm$ 62   | 44 $\pm$ 66   | 23 $\pm$ 46   | 40 $\pm$ 53   | 31 $\pm$ 49   | 45 $\pm$ 71   | 32 $\pm$ 31   | 23 $\pm$ 26   | 16 |
| 100        | 69 $\pm$ 106  | 42 $\pm$ 106  | 16 $\pm$ 57   | 11 $\pm$ 35   | 36 $\pm$ 113  | 19 $\pm$ 77   | 1 $\pm$ 3     | 0 $\pm$ 1     | 0 $\pm$ 0     | 1 $\pm$ 5     | 16 |
| 1000       | 0 $\pm$ 0     | 0 $\pm$ 0     | 0 $\pm$ 0     | 0 $\pm$ 1     | 0 $\pm$ 0     | 16 |

Mean  $\pm$  standard deviation

## Normalized percent activity

## Time bin (minutes post exposure)

| [ $\mu$ M] | 1-30   | 31-60  | 61-90  | 91-120 | 121-150 | 151-180 | 181-210 | 211-240 | 241-270 | 271-300 |
|------------|--------|--------|--------|--------|---------|---------|---------|---------|---------|---------|
| 0          | 47-153 | 26-174 | 41-159 | 47-153 | 38-162  | 44-156  | 28-172  | 37-163  | 42-158  | 26-174  |
| 1          | 14-117 | 21-101 | 25-78  | 7-193  | 22-88   | 33-99   | 23-92   | 24-61   | 32-82   | 15-60   |
| 10         | 3-47   | 6-35   | 6-68   | 12-77  | 0-46    | 13-66   | 6-55    | 9-80    | 16-47   | 10-36   |
| 100        | 16-121 | -11-96 | -13-45 | -7-28  | -21-92  | -19-58  | -12     | 0-1     | 0-0     | -13     |
| 1000       | 0-0    | 0-0    | 0-0    | 0-1    | 0-0     | 0-0     | 0-0     | 0-0     | 0-0     | 0-0     |

95% confidence interval

## p-values

## Time bin (minutes post exposure)

| [ $\mu$ M] | 1-30  | 31-60 | 61-90 | 91-120 | 121-150 | 151-180 | 181-210 | 211-240 | 241-270 | 271-300 |
|------------|-------|-------|-------|--------|---------|---------|---------|---------|---------|---------|
| 1          | 0.009 | 0.968 | 0.989 | 0.738  | 0.952   | 1.000   | 0.893   | 0.697   | 0.905   | 0.900   |
| 10         | 0.001 | 0.043 | 0.024 | 0.057  | 0.004   | 0.180   | 0.065   | 0.066   | 0.236   | 0.409   |
| 100        | 0.039 | 0.001 | 0.001 | 0.001  | 0.001   | 0.001   | 0.001   | 0.001   | 0.001   | 0.001   |
| 1000       | 0.001 | 0.001 | 0.001 | 0.001  | 0.001   | 0.001   | 0.001   | 0.001   | 0.001   | 0.001   |

Two-way repeated measures ANOVA, Tukey's post-hoc,  $p \leq 0.05$

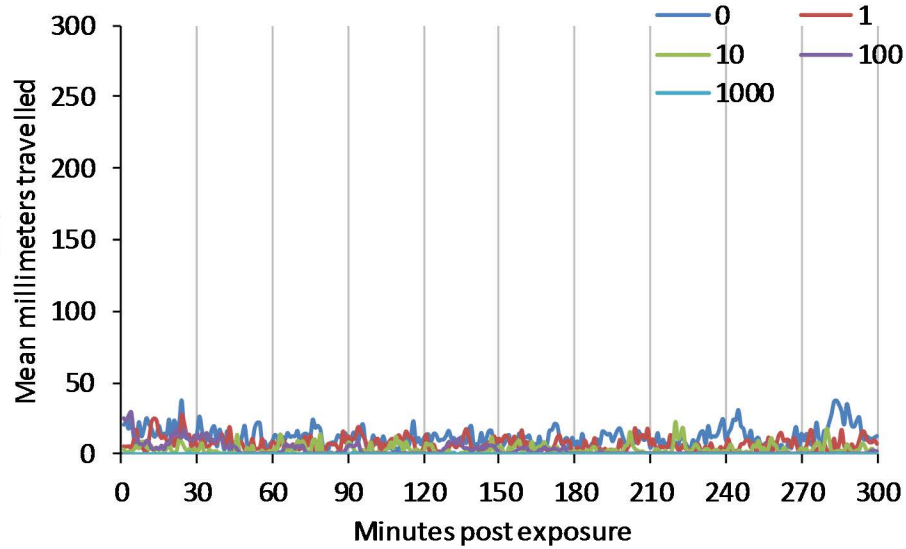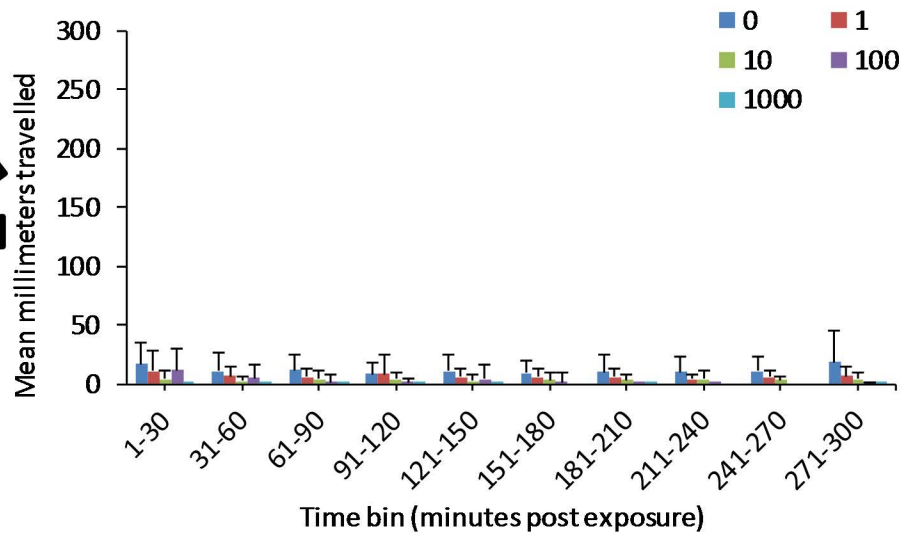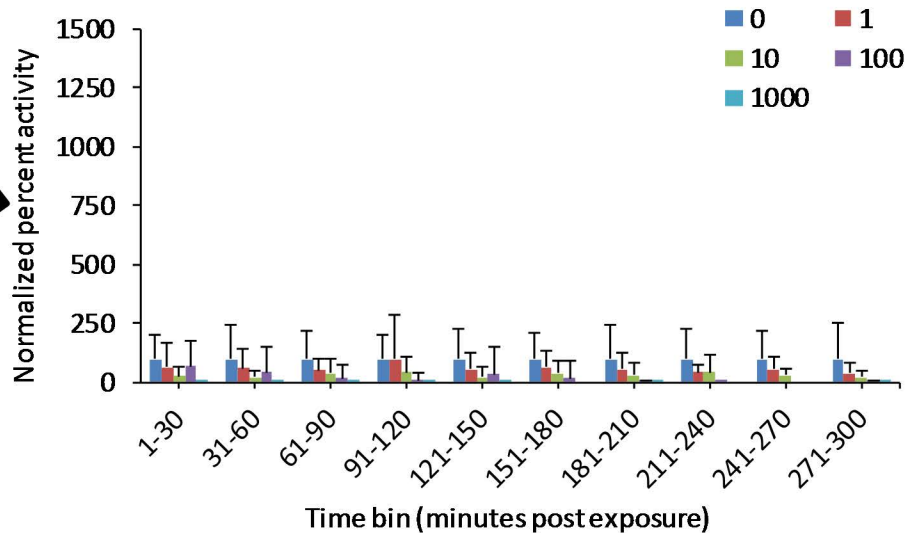

# CHEMICAL: Mecamylamine

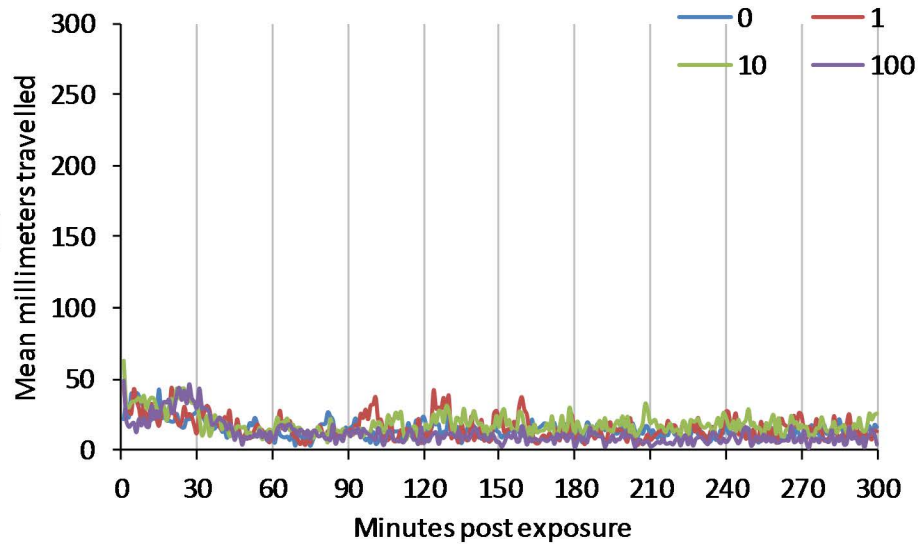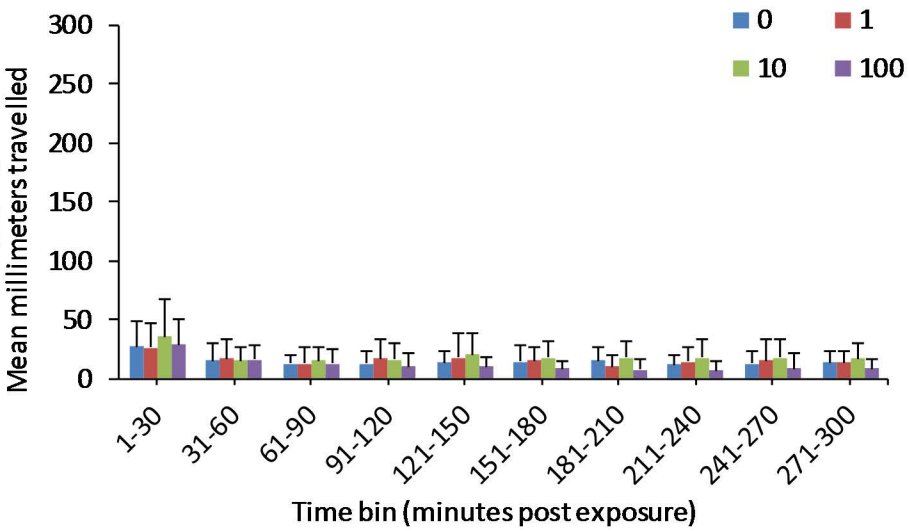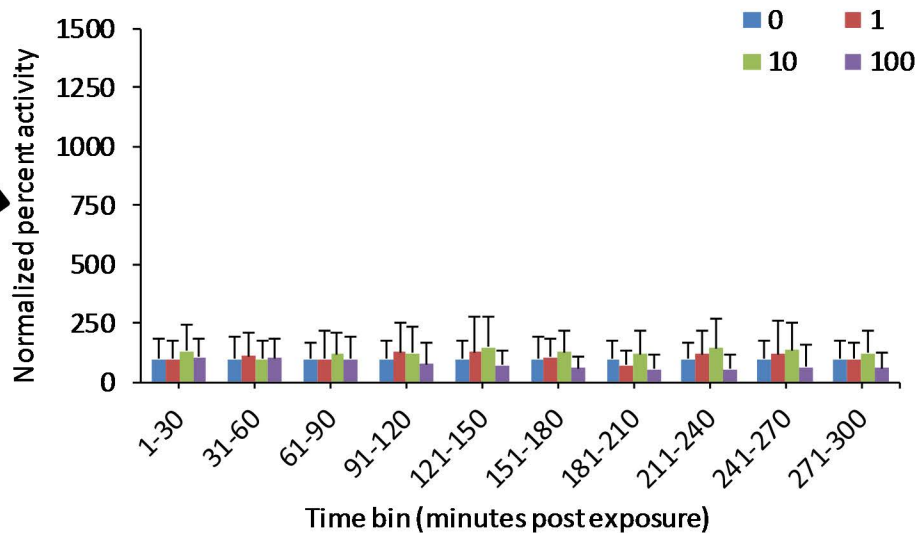

## Normalized percent activity

| [μM] | Time bin (minutes post exposure) |           |          |           |           |          |          |           |           |          | N  |
|------|----------------------------------|-----------|----------|-----------|-----------|----------|----------|-----------|-----------|----------|----|
|      | 1-30                             | 31-60     | 61-90    | 91-120    | 121-150   | 151-180  | 181-210  | 211-240   | 241-270   | 271-300  |    |
| 0    | 100 ± 81                         | 100 ± 90  | 100 ± 66 | 100 ± 75  | 100 ± 74  | 100 ± 96 | 100 ± 76 | 100 ± 66  | 100 ± 74  | 100 ± 73 | 24 |
| 1    | 98 ± 75                          | 110 ± 102 | 99 ± 116 | 129 ± 124 | 130 ± 145 | 106 ± 77 | 71 ± 65  | 119 ± 98  | 120 ± 141 | 96 ± 75  | 22 |
| 10   | 130 ± 117                        | 97 ± 76   | 120 ± 91 | 123 ± 115 | 150 ± 126 | 126 ± 94 | 119 ± 97 | 146 ± 123 | 137 ± 115 | 124 ± 95 | 23 |
| 100  | 107 ± 79                         | 105 ± 80  | 99 ± 99  | 79 ± 90   | 72 ± 62   | 60 ± 51  | 54 ± 59  | 57 ± 64   | 66 ± 97   | 59 ± 67  | 21 |

## Mean ± standard deviation

† Exclusion: precipitation observed in 1000 μM treatment group

## Normalized percent activity

| [μM] | Time bin (minutes post exposure) |        |        |        |         |         |         |         |         |         |
|------|----------------------------------|--------|--------|--------|---------|---------|---------|---------|---------|---------|
|      | 1-30                             | 31-60  | 61-90  | 91-120 | 121-150 | 151-180 | 181-210 | 211-240 | 241-270 | 271-300 |
| 0    | 67-133                           | 63-137 | 73-127 | 69-131 | 70-130  | 61-139  | 69-131  | 73-127  | 70-130  | 70-130  |
| 1    | 66-130                           | 66-153 | 50-149 | 76-182 | 68-192  | 73-139  | 44-99   | 77-161  | 60-180  | 64-128  |
| 10   | 81-179                           | 65-129 | 82-158 | 75-171 | 97-202  | 87-166  | 79-160  | 95-198  | 89-185  | 84-163  |
| 100  | 73-142                           | 70-140 | 56-142 | 40-118 | 45-99   | 38-82   | 28-80   | 29-85   | 24-108  | 30-88   |

## 95% confidence interval

## p-values

| [μM] | Time bin (minutes post exposure) |       |       |        |         |         |         |         |         |         |
|------|----------------------------------|-------|-------|--------|---------|---------|---------|---------|---------|---------|
|      | 1-30                             | 31-60 | 61-90 | 91-120 | 121-150 | 151-180 | 181-210 | 211-240 | 241-270 | 271-300 |
| 1    | 1.000                            | 1.000 | 0.678 | 0.998  | 0.867   | 0.972   | 0.389   | 1.000   | 0.985   | 0.999   |
| 10   | 0.656                            | 0.992 | 0.947 | 0.925  | 0.357   | 0.588   | 0.983   | 0.767   | 0.747   | 0.724   |
| 100  | 0.898                            | 0.984 | 0.926 | 0.500  | 0.600   | 0.450   | 0.034   | 0.035   | 0.049   | 0.116   |

Two-way repeated measures ANOVA, Tukey's post-hoc,  $p \leq 0.05$

**CHEMICAL: (+)-Methamphetamine**

**Normalized percent activity**

**Time bin (minutes post exposure)**

| [ $\mu\text{M}$ ] | 1-30          | 31-60         | 61-90         | 91-120        | 121-150       | 151-180      | 181-210       | 211-240      | 241-270      | 271-300      | N  |
|-------------------|---------------|---------------|---------------|---------------|---------------|--------------|---------------|--------------|--------------|--------------|----|
| 0                 | 100 $\pm$ 106 | 100 $\pm$ 90  | 100 $\pm$ 106 | 100 $\pm$ 85  | 100 $\pm$ 84  | 100 $\pm$ 96 | 100 $\pm$ 88  | 100 $\pm$ 77 | 100 $\pm$ 75 | 100 $\pm$ 74 | 16 |
| 1                 | 127 $\pm$ 140 | 109 $\pm$ 143 | 12 $\pm$ 136  | 165 $\pm$ 259 | 119 $\pm$ 180 | 68 $\pm$ 73  | 128 $\pm$ 131 | 70 $\pm$ 74  | 37 $\pm$ 40  | 31 $\pm$ 45  | 16 |
| 10                | 35 $\pm$ 53   | 21 $\pm$ 49   | 14 $\pm$ 33   | 18 $\pm$ 47   | 4 $\pm$ 7     | 4 $\pm$ 4    | 5 $\pm$ 4     | 5 $\pm$ 6    | 2 $\pm$ 3    | 3 $\pm$ 3    | 16 |
| 100               | 1 $\pm$ 1     | 1 $\pm$ 2     | 1 $\pm$ 2     | 1 $\pm$ 2     | 1 $\pm$ 2     | 1 $\pm$ 2    | 6 $\pm$ 19    | 13 $\pm$ 44  | 4 $\pm$ 12   | 0 $\pm$ 1    | 16 |
| 1000              | 1 $\pm$ 2     | 0 $\pm$ 1     | 0 $\pm$ 0     | 0 $\pm$ 0     | 0 $\pm$ 0     | 0 $\pm$ 0    | 0 $\pm$ 0     | 0 $\pm$ 0    | 0 $\pm$ 0    | 0 $\pm$ 0    | 16 |

Mean  $\pm$  standard deviation

**Normalized percent activity**

**Time bin (minutes post exposure)**

| [ $\mu\text{M}$ ] | 1-30   | 31-60  | 61-90  | 91-120 | 121-150 | 151-180 | 181-210 | 211-240 | 241-270 | 271-300 |
|-------------------|--------|--------|--------|--------|---------|---------|---------|---------|---------|---------|
| 0                 | 47-153 | 55-145 | 47-153 | 57-143 | 58-142  | 52-148  | 56-144  | 62-138  | 63-137  | 63-137  |
| 1                 | 57-197 | 37-131 | 44-130 | 35-294 | 29-209  | 32-105  | 38-219  | 33-107  | 17-56   | 9-54    |
| 10                | 9-61   | -3-46  | -2-30  | -6-42  | 1-7     | 2-6     | 3-7     | 2-8     | 1-4     | 2-5     |
| 100               | 0-2    | 0-2    | 0-2    | 0-2    | 0-2     | 0-2     | -3-16   | -9-35   | -3-10   | 0-1     |
| 1000              | 0-3    | 0-1    | 0-0    | 0-0    | 0-0     | 0-0     | 0-0     | 0-0     | 0-0     | 0-0     |

95% confidence interval

**p-values**

**Time bin (minutes post exposure)**

| [ $\mu\text{M}$ ] | 1-30  | 31-60 | 61-90 | 91-120 | 121-150 | 151-180 | 181-210 | 211-240 | 241-270 | 271-300 |
|-------------------|-------|-------|-------|--------|---------|---------|---------|---------|---------|---------|
| 1                 | 0.998 | 0.717 | 0.970 | 0.390  | 0.953   | 0.890   | 0.984   | 0.895   | 0.017   | 0.004   |
| 10                | 0.078 | 0.001 | 0.001 | 0.001  | 0.001   | 0.001   | 0.001   | 0.001   | 0.001   | 0.001   |
| 100               | 0.001 | 0.001 | 0.001 | 0.001  | 0.001   | 0.001   | 0.001   | 0.001   | 0.001   | 0.001   |
| 1000              | 0.001 | 0.001 | 0.001 | 0.001  | 0.001   | 0.001   | 0.001   | 0.001   | 0.001   | 0.001   |

Two-way repeated measures ANOVA, Tukey's post-hoc,  $p \leq 0.05$

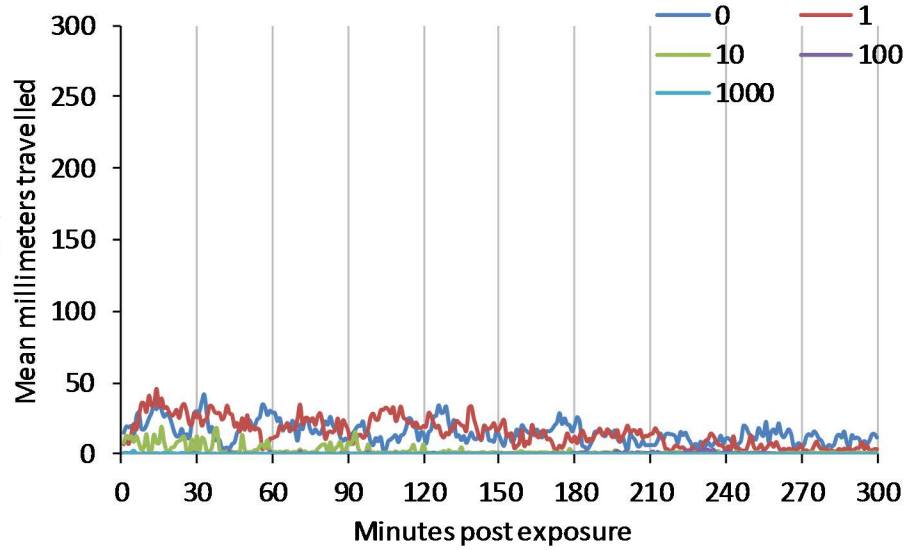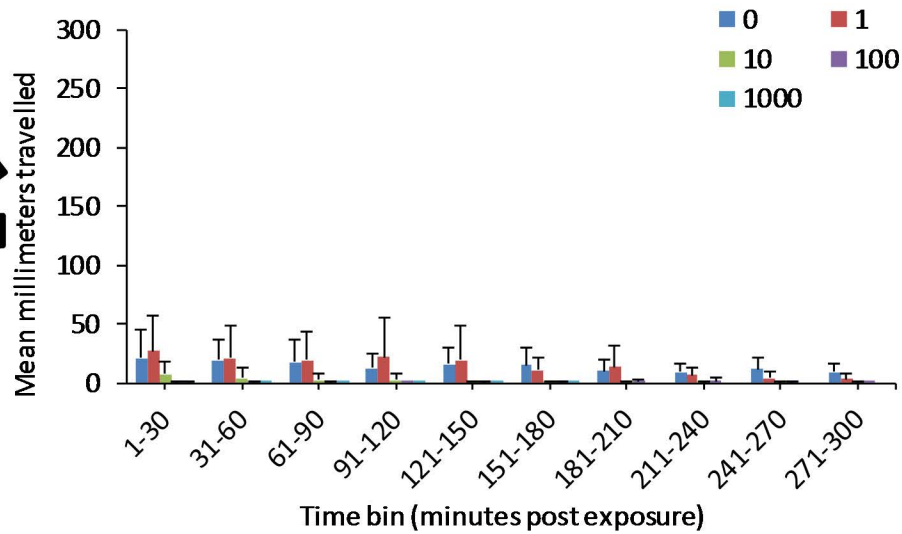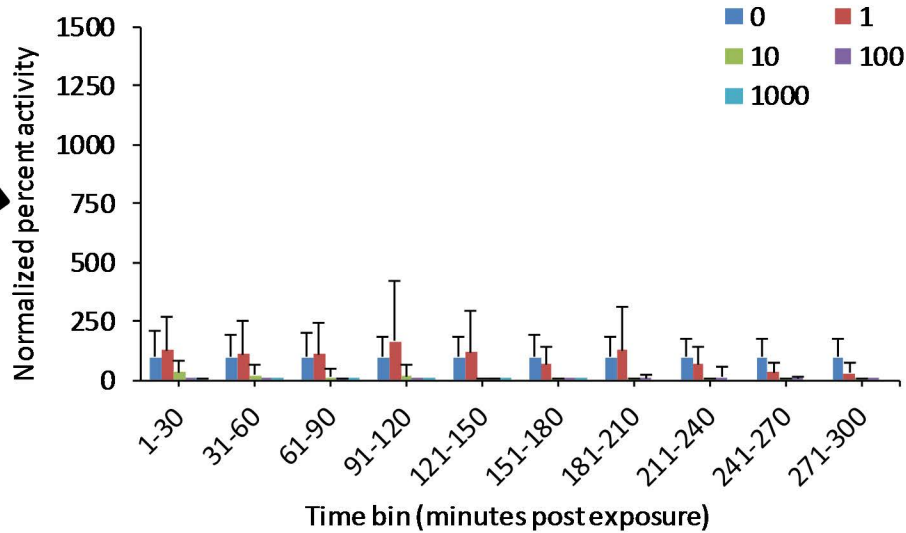

# CHEMICAL: Methyllycaconitine

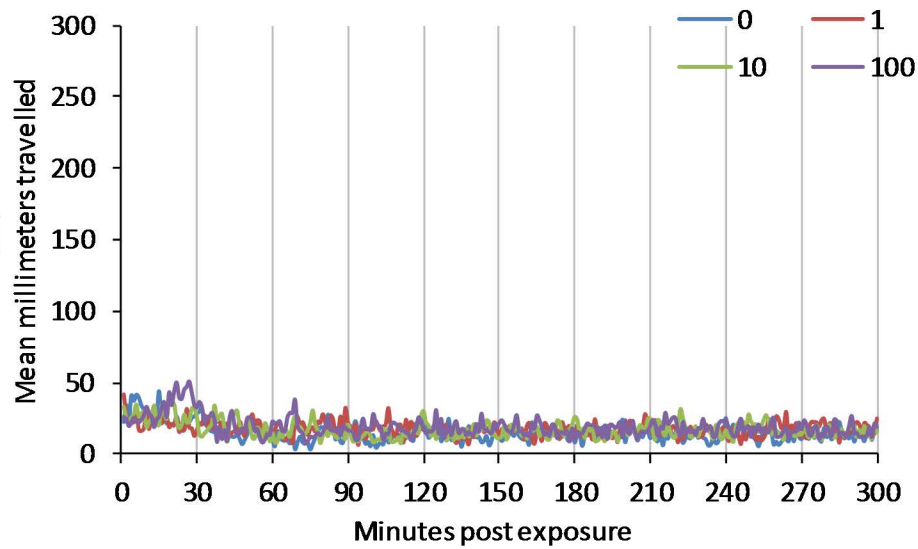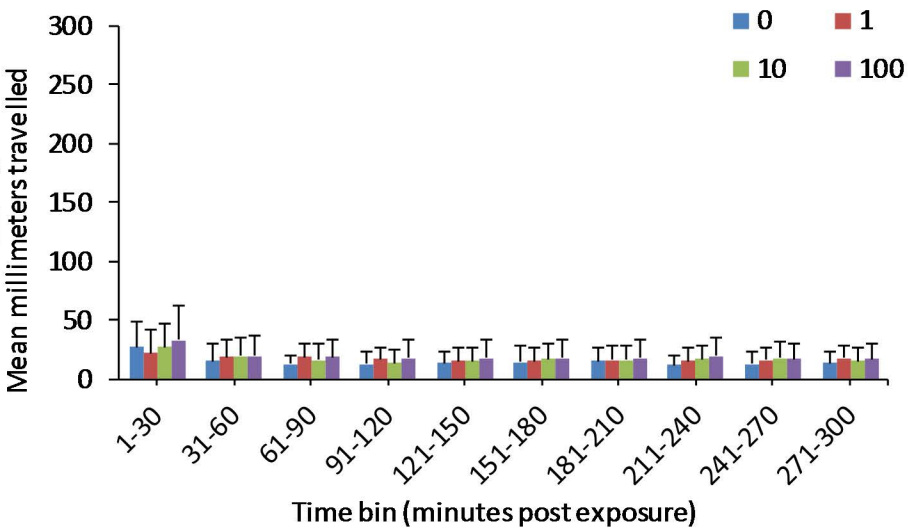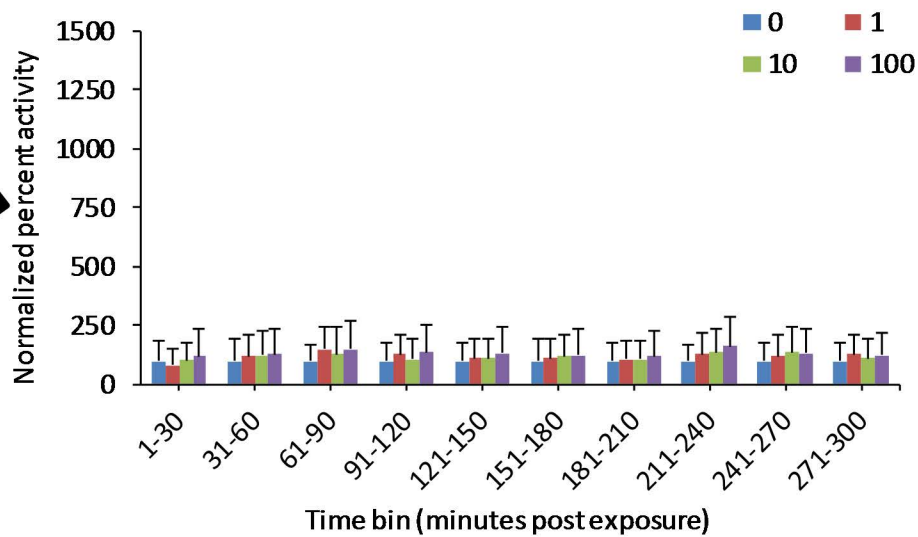

## Normalized percent activity

| [μM] | Time bin (minutes post exposure) |           |           |           |           |           |           |           |           |           | N  |
|------|----------------------------------|-----------|-----------|-----------|-----------|-----------|-----------|-----------|-----------|-----------|----|
|      | 1-30                             | 31-60     | 61-90     | 91-120    | 121-150   | 151-180   | 181-210   | 211-240   | 241-270   | 271-300   |    |
| 0    | 100 ± 81                         | 100 ± 90  | 100 ± 66  | 100 ± 75  | 100 ± 74  | 100 ± 96  | 100 ± 76  | 100 ± 66  | 100 ± 74  | 100 ± 73  | 24 |
| 1    | 81 ± 71                          | 120 ± 91  | 150 ± 92  | 130 ± 81  | 109 ± 87  | 110 ± 82  | 108 ± 81  | 127 ± 93  | 121 ± 91  | 130 ± 81  | 24 |
| 10   | 102 ± 72                         | 124 ± 105 | 129 ± 112 | 105 ± 86  | 113 ± 83  | 118 ± 93  | 106 ± 81  | 138 ± 96  | 135 ± 109 | 112 ± 83  | 24 |
| 100  | 121 ± 111                        | 128 ± 105 | 149 ± 122 | 138 ± 117 | 131 ± 117 | 124 ± 110 | 118 ± 109 | 161 ± 124 | 134 ± 100 | 122 ± 100 | 23 |

## Mean ± standard deviation

† Exclusion: precipitation observed in 1000 μM treatment group

## Normalized percent activity

| [μM] | Time bin (minutes post exposure) |        |         |        |         |         |         |         |         |         |
|------|----------------------------------|--------|---------|--------|---------|---------|---------|---------|---------|---------|
|      | 1-30                             | 31-60  | 61-90   | 91-120 | 121-150 | 151-180 | 181-210 | 211-240 | 241-270 | 271-300 |
| 0    | 67-133                           | 63-137 | 73-127  | 69-131 | 70-130  | 61-139  | 69-131  | 73-127  | 70-130  | 70-130  |
| 1    | 52-110                           | 83-158 | 112-188 | 97-163 | 74-145  | 76-143  | 75-141  | 90-165  | 84-158  | 97-163  |
| 10   | 72-131                           | 81-167 | 83-175  | 70-140 | 79-147  | 80-155  | 73-139  | 99-178  | 91-160  | 78-146  |
| 100  | 74-167                           | 84-171 | 98-200  | 90-187 | 83-180  | 78-170  | 73-164  | 109-213 | 92-175  | 81-164  |

## 95% confidence interval

## p-values

| [μM] | Time bin (minutes post exposure) |       |       |        |         |         |         |         |         |         |
|------|----------------------------------|-------|-------|--------|---------|---------|---------|---------|---------|---------|
|      | 1-30                             | 31-60 | 61-90 | 91-120 | 121-150 | 151-180 | 181-210 | 211-240 | 241-270 | 271-300 |
| 1    | 0.758                            | 0.650 | 0.317 | 0.590  | 0.951   | 0.872   | 0.977   | 0.918   | 0.905   | 0.517   |
| 10   | 0.994                            | 0.863 | 0.989 | 0.998  | 0.992   | 0.925   | 1.000   | 0.804   | 0.754   | 0.957   |
| 100  | 0.906                            | 0.898 | 0.632 | 0.868  | 0.917   | 0.911   | 0.998   | 0.462   | 0.796   | 0.918   |

Two-way repeated measures ANOVA, Tukey's post-hoc,  $p \leq 0.05$

# CHEMICAL: (-)-Nicotine

## Normalized percent activity

## Time bin (minutes post exposure)

| [ $\mu$ M] | 1-30          | 31-60         | 61-90         | 91-120        | 121-150      | 151-180      | 181-210       | 211-240      | 241-270      | 271-300      | N  |
|------------|---------------|---------------|---------------|---------------|--------------|--------------|---------------|--------------|--------------|--------------|----|
| 0          | 100 $\pm$ 70  | 100 $\pm$ 86  | 100 $\pm$ 94  | 100 $\pm$ 85  | 100 $\pm$ 84 | 100 $\pm$ 94 | 100 $\pm$ 84  | 100 $\pm$ 83 | 100 $\pm$ 87 | 100 $\pm$ 84 | 27 |
| 1          | 295 $\pm$ 137 | 305 $\pm$ 194 | 185 $\pm$ 106 | 242 $\pm$ 117 | 204 $\pm$ 97 | 200 $\pm$ 93 | 205 $\pm$ 104 | 205 $\pm$ 81 | 157 $\pm$ 58 | 201 $\pm$ 59 | 28 |
| 10         | 81 $\pm$ 49   | 4 $\pm$ 11    | 14 $\pm$ 29   | 42 $\pm$ 64   | 36 $\pm$ 51  | 35 $\pm$ 46  | 41 $\pm$ 56   | 41 $\pm$ 56  | 34 $\pm$ 51  | 56 $\pm$ 81  | 30 |
| 100        | 3 $\pm$ 8     | 2 $\pm$ 7     | 0 $\pm$ 2     | 0 $\pm$ 0     | 0 $\pm$ 0    | 0 $\pm$ 0    | 0 $\pm$ 0     | 0 $\pm$ 0    | 1 $\pm$ 4    | 0 $\pm$ 0    | 29 |

## Mean $\pm$ standard deviation

<sup>‡</sup>Exclusion: lethality observed in 1000  $\mu$ M treatment group (30 of 30 animals)

## Normalized percent activity

## Time bin (minutes post exposure)

| [ $\mu$ M] | 1-30    | 31-60   | 61-90   | 91-120  | 121-150 | 151-180 | 181-210 | 211-240 | 241-270 | 271-300 |
|------------|---------|---------|---------|---------|---------|---------|---------|---------|---------|---------|
| 0          | 73-127  | 67-133  | 64-136  | 67-133  | 68-132  | 64-136  | 68-132  | 68-132  | 67-133  | 68-132  |
| 1          | 243-347 | 232-379 | 145-225 | 198-286 | 167-241 | 165-235 | 166-244 | 174-236 | 135-179 | 179-223 |
| 10         | 63-99   | 0-8     | 4-25    | 19-65   | 17-55   | 19-52   | 21-62   | 20-61   | 16-53   | 26-85   |
| 100        | -3-10   | -14     | 0-1     | 0-0     | 0-0     | 0-0     | 0-0     | 0-0     | -1-2    | 0-0     |

## 95% confidence interval

## p-values

## Time bin (minutes post exposure)

| [ $\mu$ M] | 1-30  | 31-60 | 61-90 | 91-120 | 121-150 | 151-180 | 181-210 | 211-240 | 241-270 | 271-300 |
|------------|-------|-------|-------|--------|---------|---------|---------|---------|---------|---------|
| 1          | 0.001 | 0.001 | 0.002 | 0.001  | 0.001   | 0.001   | 0.001   | 0.001   | 0.008   | 0.001   |
| 10         | 0.971 | 0.001 | 0.001 | 0.001  | 0.001   | 0.001   | 0.001   | 0.001   | 0.001   | 0.001   |
| 100        | 0.001 | 0.001 | 0.001 | 0.001  | 0.001   | 0.001   | 0.001   | 0.001   | 0.001   | 0.001   |

Two-way repeated measures ANOVA, Tukey's post-hoc,  $p \leq 0.05$

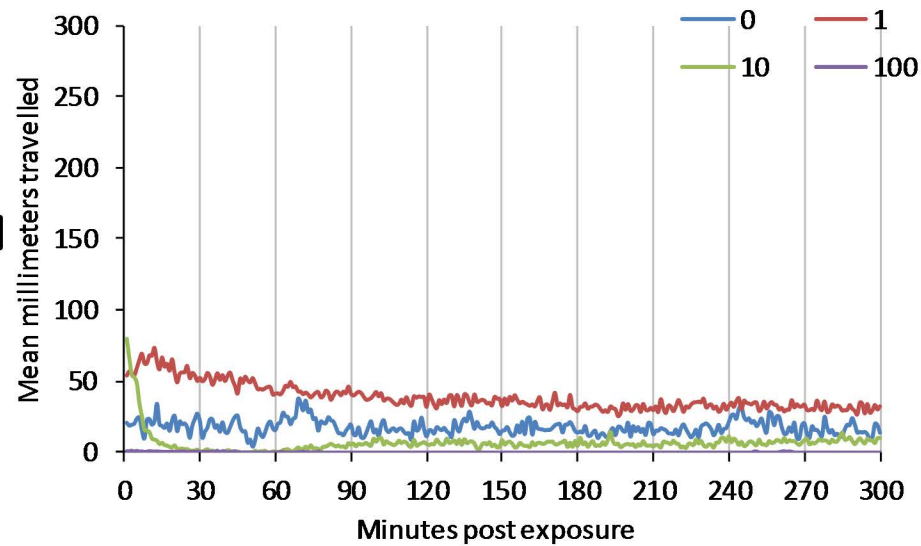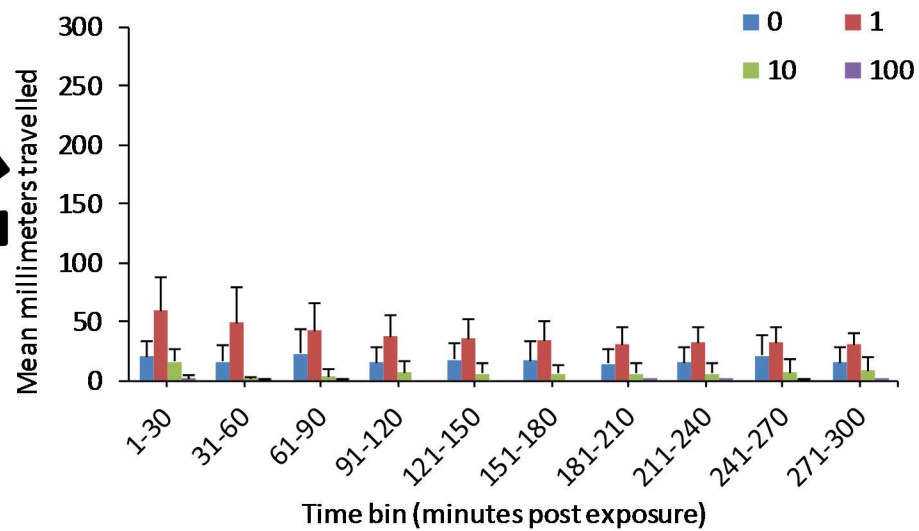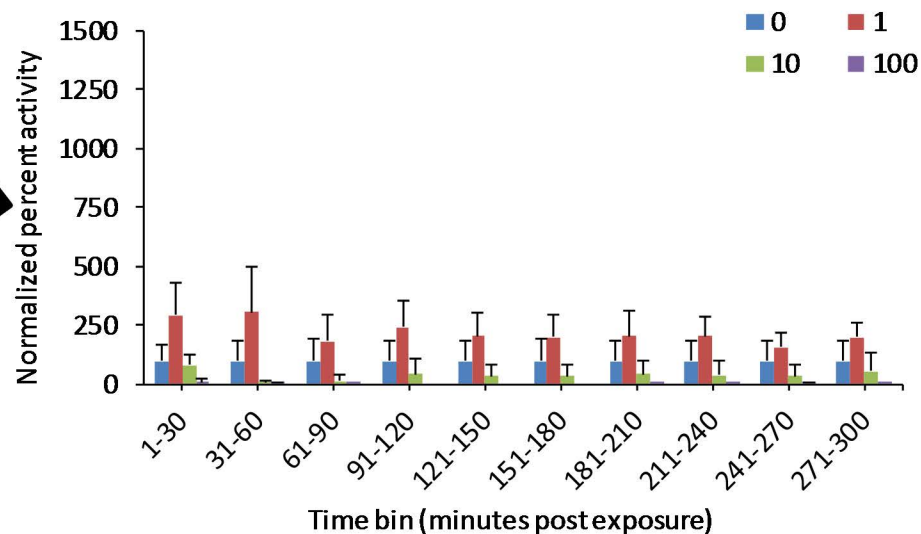

# CHEMICAL: N-methyl-D-aspartate (NMDA)

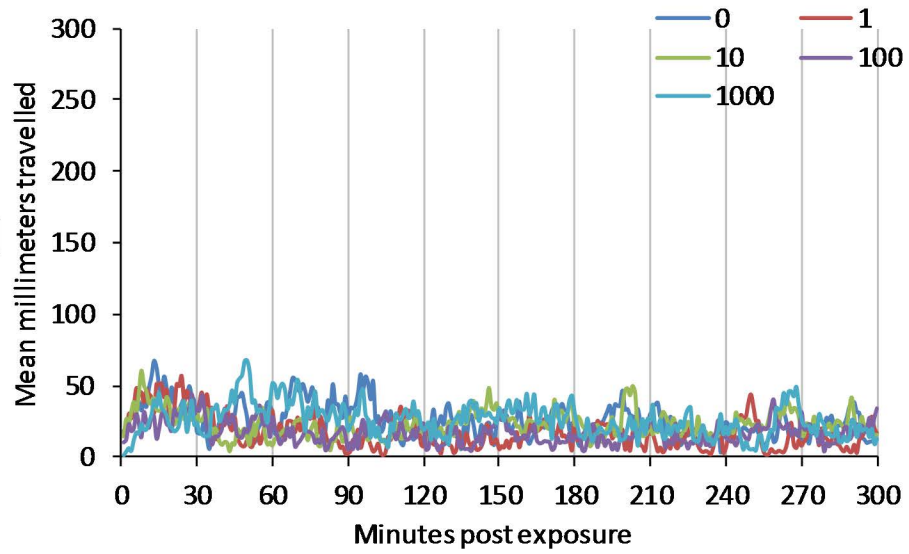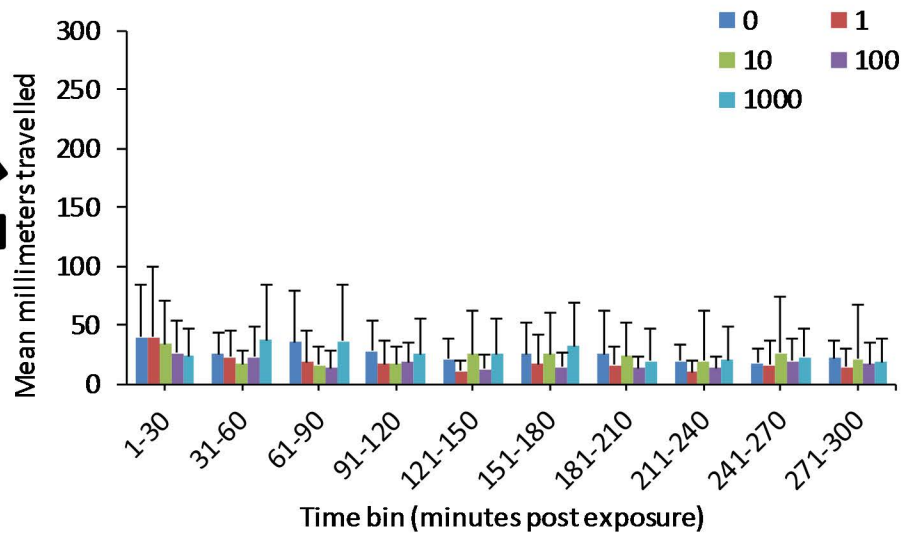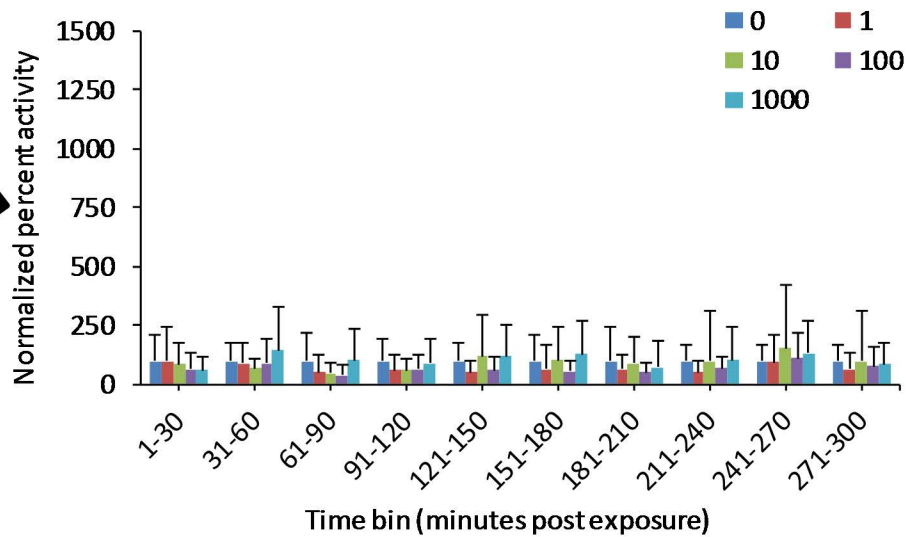

## Normalized percent activity

| [μM] | Time bin (minutes post exposure) |           |           |          |           |           |           |           |           |          | N  |
|------|----------------------------------|-----------|-----------|----------|-----------|-----------|-----------|-----------|-----------|----------|----|
|      | 1-30                             | 31-60     | 61-90     | 91-120   | 121-150   | 151-180   | 181-210   | 211-240   | 241-270   | 271-300  |    |
| 0    | 100 ± 112                        | 100 ± 73  | 100 ± 120 | 100 ± 90 | 100 ± 76  | 100 ± 108 | 100 ± 144 | 100 ± 69  | 100 ± 72  | 100 ± 68 | 16 |
| 1    | 99 ± 150                         | 89 ± 88   | 53 ± 73   | 59 ± 69  | 51 ± 45   | 66 ± 100  | 63 ± 61   | 52 ± 49   | 93 ± 120  | 66 ± 69  | 16 |
| 10   | 84 ± 94                          | 67 ± 45   | 46 ± 43   | 61 ± 51  | 120 ± 171 | 101 ± 141 | 91 ± 113  | 98 ± 213  | 152 ± 268 | 99 ± 210 | 16 |
| 100  | 65 ± 70                          | 92 ± 103  | 38 ± 43   | 67 ± 56  | 61 ± 58   | 56 ± 48   | 53 ± 37   | 69 ± 45   | 111 ± 106 | 78 ± 79  | 16 |
| 1000 | 59 ± 58                          | 147 ± 135 | 101 ± 131 | 91 ± 103 | 120 ± 136 | 128 ± 143 | 74 ± 109  | 101 ± 140 | 132 ± 139 | 84 ± 95  | 16 |

## Mean ± standard deviation

## Normalized percent activity

| [μM] | Time bin (minutes post exposure) |        |        |        |         |         |         |         |         |         |
|------|----------------------------------|--------|--------|--------|---------|---------|---------|---------|---------|---------|
|      | 1-30                             | 31-60  | 61-90  | 91-120 | 121-150 | 151-180 | 181-210 | 211-240 | 241-270 | 271-300 |
| 0    | 44-156                           | 63-137 | 40-160 | 55-145 | 62-138  | 46-154  | 28-172  | 66-134  | 64-136  | 66-134  |
| 1    | 24-174                           | 45-133 | 16-89  | 25-94  | 29-74   | 15-116  | 32-93   | 27-76   | 33-153  | 31-100  |
| 10   | 37-131                           | 44-89  | 24-67  | 36-87  | 34-206  | 31-172  | 35-148  | 11-207  | 18-286  | -6-203  |
| 100  | 30-100                           | 40-143 | 17-60  | 39-95  | 32-90   | 32-80   | 35-72   | 46-91   | 58-164  | 39-118  |
| 1000 | 30-88                            | 54-239 | 35-167 | 40-142 | 52-188  | 57-200  | 20-129  | 31-171  | 62-201  | 36-132  |

## 95% confidence interval

## p-values

| [μM] | Time bin (minutes post exposure) |       |       |        |         |         |         |         |         |         |
|------|----------------------------------|-------|-------|--------|---------|---------|---------|---------|---------|---------|
|      | 1-30                             | 31-60 | 61-90 | 91-120 | 121-150 | 151-180 | 181-210 | 211-240 | 241-270 | 271-300 |
| 1    | 1.000                            | 0.999 | 0.430 | 0.780  | 0.834   | 0.908   | 0.870   | 0.873   | 1.000   | 0.945   |
| 10   | 0.968                            | 0.917 | 0.294 | 0.813  | 0.993   | 1.000   | 0.999   | 1.000   | 0.894   | 1.000   |
| 100  | 0.624                            | 1.000 | 0.170 | 0.880  | 0.919   | 0.798   | 0.746   | 0.972   | 1.000   | 0.990   |
| 1000 | 0.483                            | 0.763 | 1.000 | 0.999  | 0.993   | 0.952   | 0.963   | 1.000   | 0.981   | 0.997   |

Two-way repeated measures ANOVA, Tukey's post-hoc,  $p \leq 0.05$



**CHEMICAL: Tricaine mesylate (MS-222)**

**Normalized percent activity**

|            | Time bin (minutes post exposure) |           |           |           |          |           |          |           |          |          |    |
|------------|----------------------------------|-----------|-----------|-----------|----------|-----------|----------|-----------|----------|----------|----|
| [ $\mu$ M] | 1-30                             | 31-60     | 61-90     | 91-120    | 121-150  | 151-180   | 181-210  | 211-240   | 241-270  | 271-300  | N  |
| 0          | 100 ± 92                         | 100 ± 106 | 100 ± 97  | 100 ± 93  | 100 ± 84 | 100 ± 100 | 100 ± 86 | 100 ± 87  | 100 ± 73 | 100 ± 74 | 29 |
| 1          | 101 ± 71                         | 156 ± 143 | 131 ± 121 | 139 ± 104 | 109 ± 82 | 125 ± 100 | 103 ± 82 | 130 ± 100 | 134 ± 82 | 111 ± 78 | 31 |
| 10         | 42 ± 51                          | 99 ± 97   | 109 ± 101 | 92 ± 84   | 82 ± 75  | 111 ± 88  | 82 ± 81  | 94 ± 78   | 87 ± 69  | 95 ± 77  | 29 |
| 100        | 21 ± 22                          | 64 ± 55   | 49 ± 58   | 41 ± 51   | 26 ± 27  | 18 ± 20   | 20 ± 30  | 24 ± 34   | 24 ± 35  | 25 ± 31  | 27 |

Mean ± standard deviation

‡ Exclusion: lethality observed in 1000  $\mu$ M treatment group (30 of 30 animals)

**Normalized percent activity**

|            | Time bin (minutes post exposure) |         |        |         |         |         |         |         |         |         |
|------------|----------------------------------|---------|--------|---------|---------|---------|---------|---------|---------|---------|
| [ $\mu$ M] | 1-30                             | 31-60   | 61-90  | 91-120  | 121-150 | 151-180 | 181-210 | 211-240 | 241-270 | 271-300 |
| 0          | 66-134                           | 61-139  | 64-136 | 65-135  | 69-131  | 63-137  | 68-132  | 68-132  | 73-127  | 72-128  |
| 1          | 76-126                           | 105-207 | 87-174 | 102-177 | 79-138  | 90-161  | 73-132  | 94-166  | 104-163 | 82-139  |
| 10         | 23-60                            | 63-135  | 72-147 | 61-123  | 54-110  | 79-144  | 52-112  | 65-123  | 61-112  | 66-123  |
| 100        | 13-30                            | 43-86   | 27-71  | 21-60   | 15-36   | 10-26   | 8-31    | 11-38   | 10-37   | 13-37   |

95% confidence interval

**p-values**

|            | Time bin (minutes post exposure) |       |       |        |         |         |         |         |         |         |
|------------|----------------------------------|-------|-------|--------|---------|---------|---------|---------|---------|---------|
| [ $\mu$ M] | 1-30                             | 31-60 | 61-90 | 91-120 | 121-150 | 151-180 | 181-210 | 211-240 | 241-270 | 271-300 |
| 1          | 0.847                            | 0.108 | 0.493 | 0.286  | 0.902   | 0.502   | 0.920   | 0.565   | 0.455   | 0.904   |
| 10         | 0.001                            | 1.000 | 0.996 | 0.977  | 0.844   | 0.911   | 0.705   | 0.996   | 0.878   | 0.990   |
| 100        | 0.001                            | 0.656 | 0.080 | 0.006  | 0.001   | 0.001   | 0.001   | 0.001   | 0.001   | 0.001   |

Two-way repeated measures ANOVA, Tukey's post-hoc,  $p \leq 0.05$

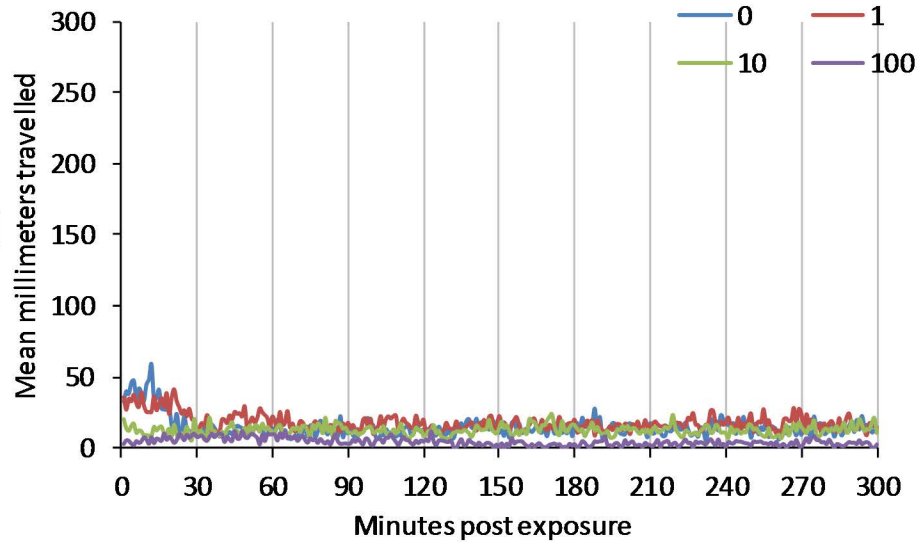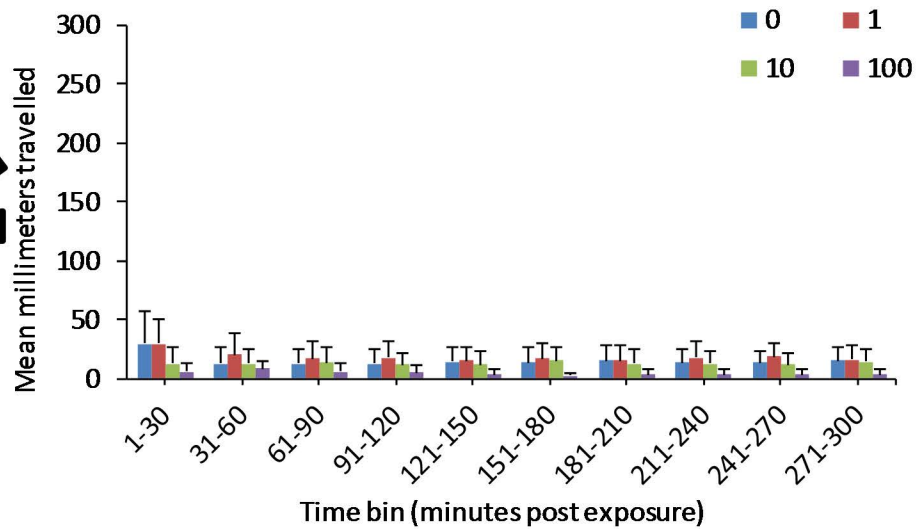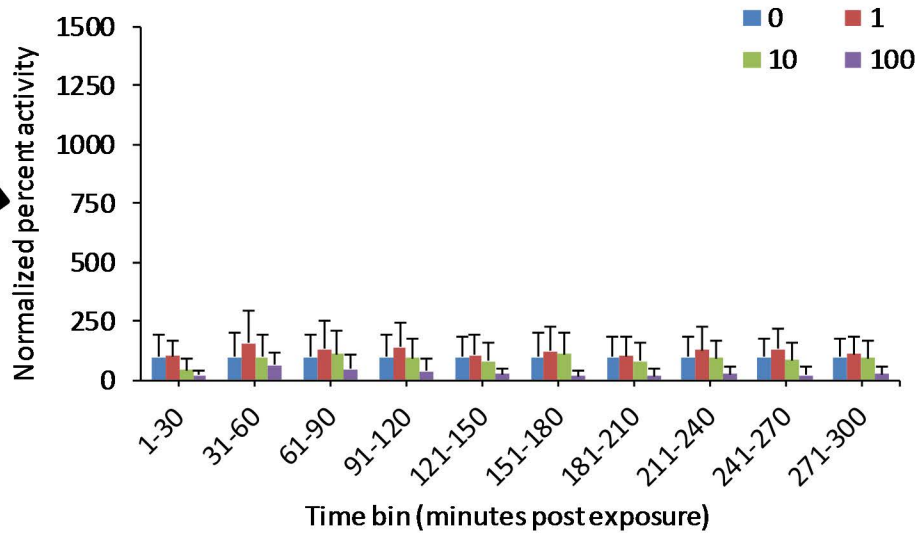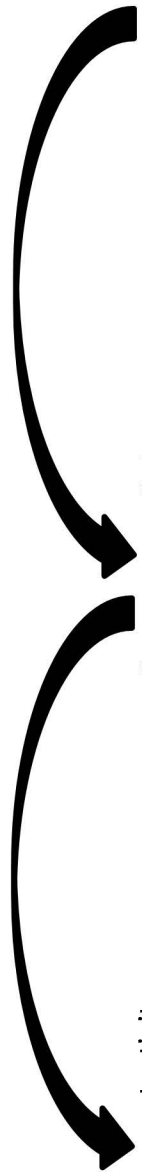

# GABA agonists and positive modulators

## **10 tested chemicals:**

Alfaxalone (5 $\alpha$ -pregnan-3 $\alpha$ -ol-11,20-dione)

( $\pm$ )-Baclofen

Carbamazepine

CGP 13501

Chlormethiazole

Ethanol

gamma-Aminobutyric Acid (GABA)

Muscimol

SKF 97541 (CGP 35024)

Valproic Acid

**CHEMICAL: Alfaxalone (5 $\alpha$ -pregnan-3 $\alpha$ -ol-11,20-dione )**

**Normalized percent activity**      **Time bin (minutes post exposure)**

| [ $\mu$ M] | 1-30         | 31-60        | 61-90         | 91-120       | 121-150      | 151-180      | 181-210      | 211-240      | 241-270      | 271-300      | N  |
|------------|--------------|--------------|---------------|--------------|--------------|--------------|--------------|--------------|--------------|--------------|----|
| 0          | 100 $\pm$ 52 | 100 $\pm$ 59 | 100 $\pm$ 108 | 100 $\pm$ 78 | 100 $\pm$ 60 | 100 $\pm$ 70 | 100 $\pm$ 69 | 100 $\pm$ 70 | 100 $\pm$ 57 | 100 $\pm$ 60 | 19 |
| 1          | 66 $\pm$ 31  | 77 $\pm$ 36  | 63 $\pm$ 30   | 96 $\pm$ 46  | 92 $\pm$ 42  | 99 $\pm$ 66  | 92 $\pm$ 51  | 94 $\pm$ 56  | 112 $\pm$ 64 | 98 $\pm$ 58  | 24 |
| 10         | 1 $\pm$ 1    | 2 $\pm$ 8    | 2 $\pm$ 8     | 0 $\pm$ 0    | 0 $\pm$ 1    | 0 $\pm$ 1    | 1 $\pm$ 2    | 1 $\pm$ 2    | 2 $\pm$ 5    | 1 $\pm$ 2    | 21 |

Mean  $\pm$  standard deviation

<sup>†</sup> Exclusion: precipitation observed in 100 and 1000  $\mu$ M treatment groups

**Normalized percent activity**      **Time bin (minutes post exposure)**

| [ $\mu$ M] | 1-30   | 31-60  | 61-90  | 91-120 | 121-150 | 151-180 | 181-210 | 211-240 | 241-270 | 271-300 |
|------------|--------|--------|--------|--------|---------|---------|---------|---------|---------|---------|
| 0          | 76-124 | 73-127 | 51-149 | 64-136 | 73-127  | 68-132  | 68-132  | 68-132  | 74-126  | 72-128  |
| 1          | 54-79  | 62-91  | 51-75  | 77-114 | 75-109  | 73-126  | 71-113  | 72-117  | 86-138  | 74-122  |
| 10         | 0-1    | -16    | -16    | 0-0    | 0-0     | 0-1     | 0-2     | 0-1     | 0-4     | 0-1     |

95% confidence interval

**p-values**      **Time bin (minutes post exposure)**

| [ $\mu$ M] | 1-30  | 31-60 | 61-90 | 91-120 | 121-150 | 151-180 | 181-210 | 211-240 | 241-270 | 271-300 |
|------------|-------|-------|-------|--------|---------|---------|---------|---------|---------|---------|
| 1          | 0.054 | 0.437 | 0.400 | 0.858  | 1.000   | 1.000   | 0.999   | 0.985   | 0.858   | 0.986   |
| 10         | 0.001 | 0.001 | 0.001 | 0.001  | 0.001   | 0.001   | 0.001   | 0.001   | 0.001   | 0.001   |

Two-way repeated measures ANOVA, Tukey's post-hoc,  $p \leq 0.05$

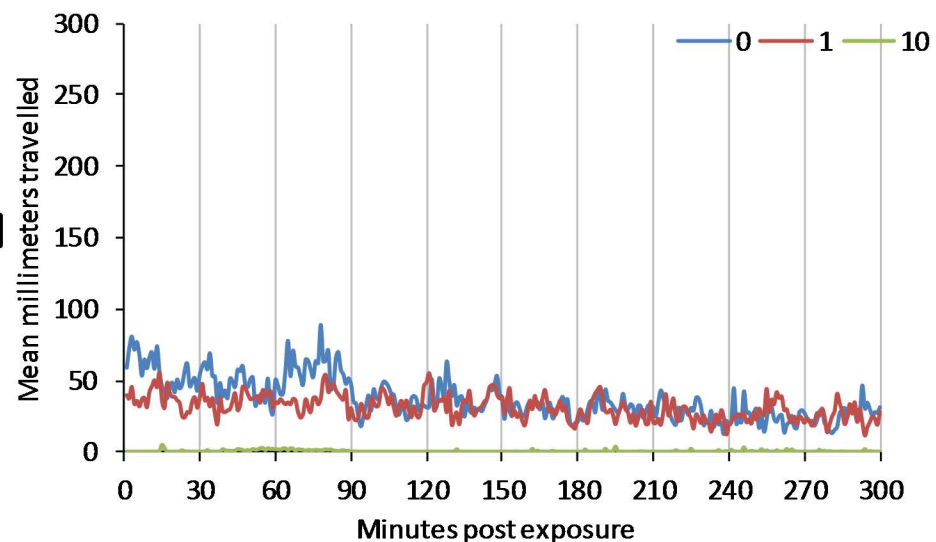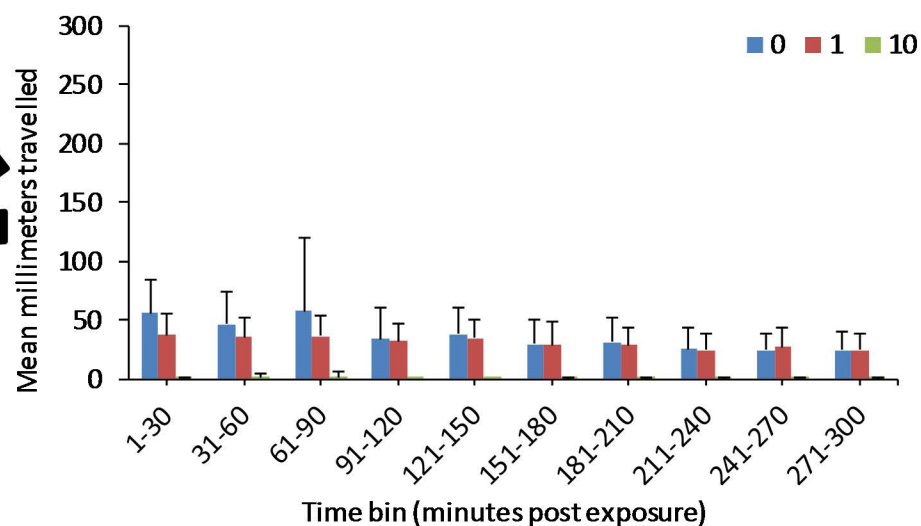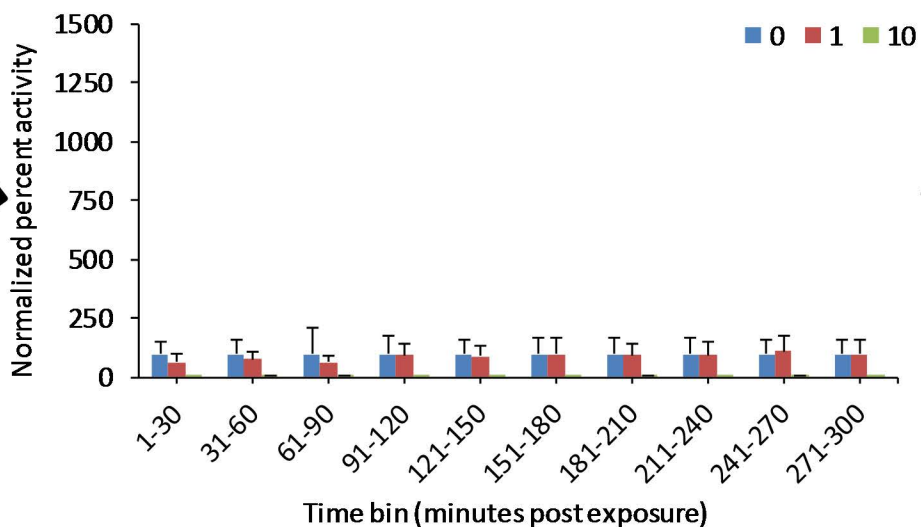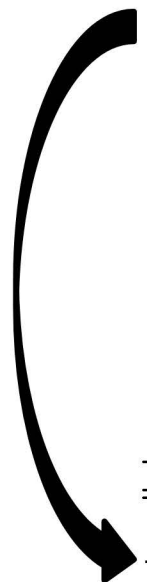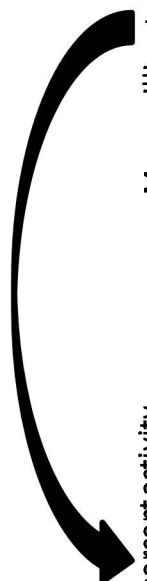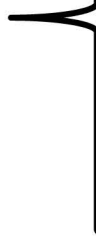

**CHEMICAL: (±)-Baclofen**

**Normalized percent activity**

**Time bin (minutes post exposure)**

| [μM] | 1-30     | 31-60    | 61-90    | 91-120   | 121-150  | 151-180  | 181-210  | 211-240  | 241-270  | 271-300  | N  |
|------|----------|----------|----------|----------|----------|----------|----------|----------|----------|----------|----|
| 0    | 100 ± 85 | 100 ± 92 | 100 ± 87 | 100 ± 93 | 100 ± 79 | 100 ± 84 | 100 ± 80 | 100 ± 75 | 100 ± 90 | 100 ± 66 | 16 |
| 1    | 52 ± 43  | 51 ± 29  | 56 ± 33  | 56 ± 51  | 44 ± 40  | 65 ± 53  | 44 ± 35  | 55 ± 34  | 44 ± 35  | 52 ± 31  | 16 |
| 10   | 46 ± 23  | 50 ± 28  | 55 ± 27  | 58 ± 34  | 41 ± 25  | 57 ± 32  | 58 ± 48  | 63 ± 55  | 57 ± 24  | 51 ± 31  | 14 |
| 100  | 74 ± 61  | 82 ± 58  | 98 ± 71  | 103 ± 86 | 74 ± 72  | 67 ± 57  | 68 ± 60  | 75 ± 66  | 71 ± 64  | 70 ± 50  | 14 |
| 1000 | 102 ± 47 | 92 ± 81  | 41 ± 47  | 37 ± 31  | 40 ± 35  | 29 ± 25  | 29 ± 37  | 37 ± 32  | 36 ± 35  | 34 ± 33  | 16 |

**Mean ± standard deviation**

**Normalized percent activity**

**Time bin (minutes post exposure)**

| [μM] | 1-30   | 31-60  | 61-90  | 91-120 | 121-150 | 151-180 | 181-210 | 211-240 | 241-270 | 271-300 |
|------|--------|--------|--------|--------|---------|---------|---------|---------|---------|---------|
| 0    | 58-142 | 54-146 | 57-143 | 53-147 | 61-139  | 58-142  | 60-140  | 62-138  | 55-145  | 67-133  |
| 1    | 30-73  | 36-65  | 40-73  | 30-82  | 24-64   | 39-92   | 26-61   | 38-72   | 26-61   | 37-68   |
| 10   | 33-58  | 35-65  | 40-69  | 40-76  | 28-55   | 40-74   | 32-83   | 34-93   | 44-70   | 34-67   |
| 100  | 41-107 | 51-113 | 60-136 | 57-148 | 36-113  | 36-97   | 36-100  | 40-111  | 37-105  | 44-97   |
| 1000 | 79-126 | 52-133 | 18-65  | 21-52  | 23-58   | 17-42   | 11-47   | 21-53   | 18-53   | 18-51   |

**95% confidence interval**

**p-values**

**Time bin (minutes post exposure)**

| [μM] | 1-30  | 31-60 | 61-90 | 91-120 | 121-150 | 151-180 | 181-210 | 211-240 | 241-270 | 271-300 |
|------|-------|-------|-------|--------|---------|---------|---------|---------|---------|---------|
| 1    | 0.155 | 0.426 | 0.530 | 0.593  | 0.097   | 0.623   | 0.094   | 0.408   | 0.315   | 0.204   |
| 10   | 0.198 | 0.469 | 0.689 | 0.688  | 0.130   | 0.628   | 0.439   | 0.626   | 0.976   | 0.173   |
| 100  | 0.908 | 1.000 | 0.999 | 1.000  | 0.806   | 0.643   | 0.682   | 0.803   | 0.982   | 0.651   |
| 1000 | 0.908 | 1.000 | 0.006 | 0.026  | 0.026   | 0.001   | 0.001   | 0.009   | 0.057   | 0.001   |

**Two-way repeated measures ANOVA, Tukey's post-hoc, p ≤ 0.05**

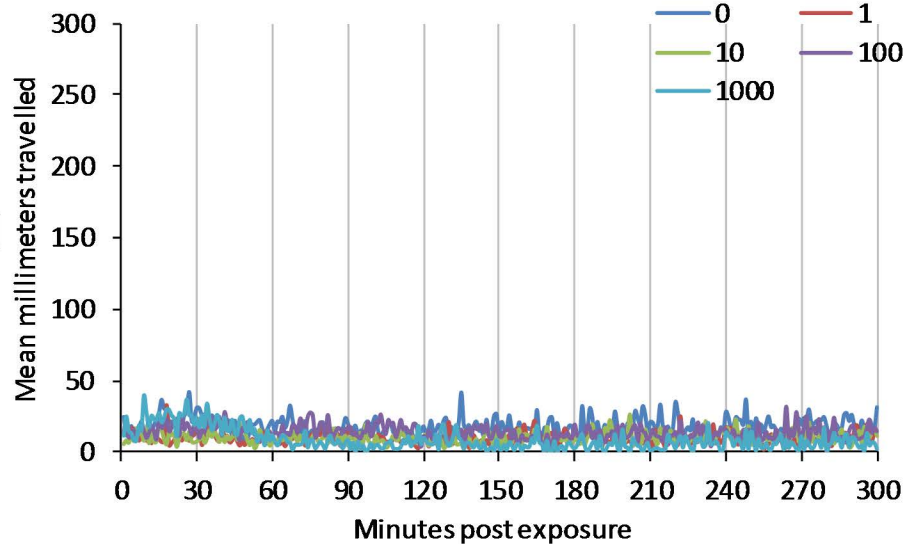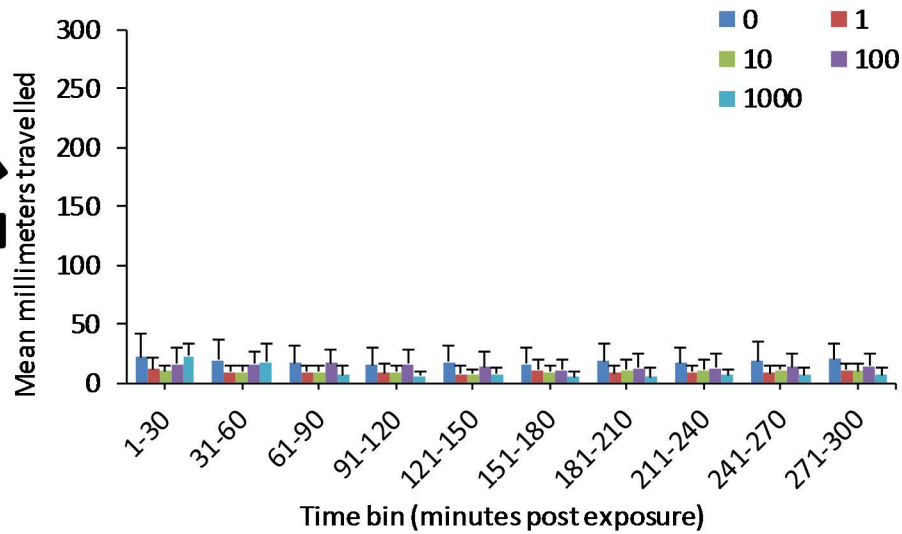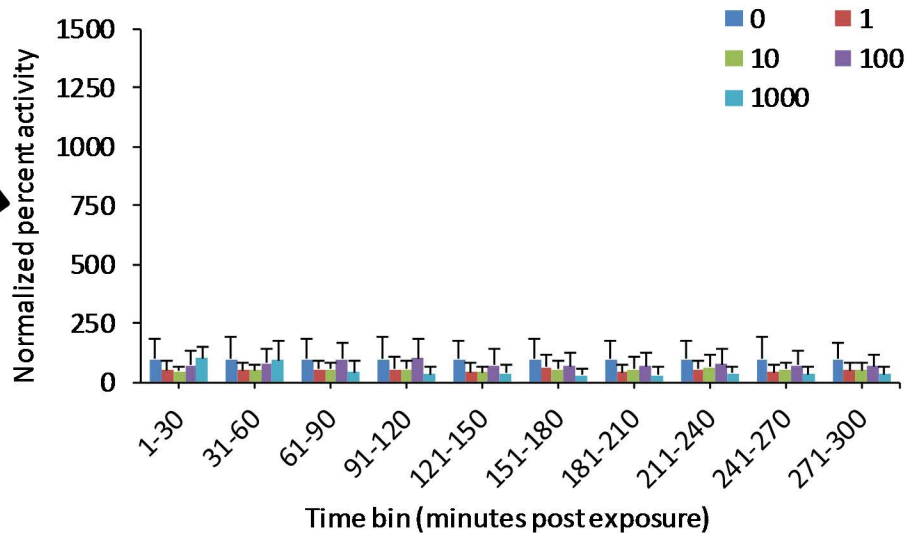

# CHEMICAL: Carbamazepine

## Normalized percent activity

|                   | Time bin (minutes post exposure) |              |              |              |              |              |              |              |              |              |    |
|-------------------|----------------------------------|--------------|--------------|--------------|--------------|--------------|--------------|--------------|--------------|--------------|----|
| [ $\mu\text{M}$ ] | 1-30                             | 31-60        | 61-90        | 91-120       | 121-150      | 151-180      | 181-210      | 211-240      | 241-270      | 271-300      | N  |
| 0                 | 100 $\pm$ 53                     | 100 $\pm$ 70 | 100 $\pm$ 66 | 100 $\pm$ 67 | 100 $\pm$ 68 | 100 $\pm$ 71 | 100 $\pm$ 61 | 100 $\pm$ 60 | 100 $\pm$ 66 | 100 $\pm$ 66 | 24 |
| 1                 | 61 $\pm$ 33                      | 58 $\pm$ 44  | 79 $\pm$ 68  | 68 $\pm$ 53  | 64 $\pm$ 47  | 59 $\pm$ 48  | 72 $\pm$ 55  | 66 $\pm$ 45  | 87 $\pm$ 62  | 75 $\pm$ 59  | 23 |
| 10                | 78 $\pm$ 55                      | 83 $\pm$ 55  | 85 $\pm$ 54  | 78 $\pm$ 62  | 62 $\pm$ 36  | 75 $\pm$ 43  | 69 $\pm$ 45  | 71 $\pm$ 44  | 89 $\pm$ 66  | 99 $\pm$ 50  | 22 |
| 100               | 54 $\pm$ 27                      | 58 $\pm$ 38  | 51 $\pm$ 32  | 44 $\pm$ 28  | 38 $\pm$ 21  | 40 $\pm$ 26  | 42 $\pm$ 24  | 29 $\pm$ 22  | 48 $\pm$ 29  | 36 $\pm$ 30  | 24 |
| 1000              | 24 $\pm$ 14                      | 15 $\pm$ 16  | 17 $\pm$ 28  | 14 $\pm$ 23  | 10 $\pm$ 24  | 6 $\pm$ 15   | 6 $\pm$ 18   | 1 $\pm$ 7    | 0 $\pm$ 0    | 0 $\pm$ 0    | 24 |

## Mean $\pm$ standard deviation

## Normalized percent activity

|                   | Time bin (minutes post exposure) |        |        |        |         |         |         |         |         |         |
|-------------------|----------------------------------|--------|--------|--------|---------|---------|---------|---------|---------|---------|
| [ $\mu\text{M}$ ] | 1-30                             | 31-60  | 61-90  | 91-120 | 121-150 | 151-180 | 181-210 | 211-240 | 241-270 | 271-300 |
| 0                 | 78-122                           | 71-129 | 73-127 | 73-127 | 72-128  | 71-129  | 75-125  | 75-125  | 73-127  | 73-127  |
| 1                 | 47-75                            | 39-76  | 50-107 | 46-91  | 44-83   | 39-79   | 49-95   | 47-84   | 61-113  | 50-100  |
| 10                | 54-101                           | 60-107 | 62-108 | 51-104 | 46-77   | 57-93   | 50-88   | 52-90   | 61-117  | 78-120  |
| 100               | 42-65                            | 42-73  | 38-64  | 32-56  | 30-47   | 29-50   | 32-52   | 20-38   | 36-60   | 24-49   |
| 1000              | 19-30                            | 8-21   | 5-28   | 4-23   | 0-19    | -1-12   | -1-14   | -14     | 0-0     | 0-0     |

## 95% confidence interval

## p-values

|                   | Time bin (minutes post exposure) |       |       |        |         |         |         |         |         |         |
|-------------------|----------------------------------|-------|-------|--------|---------|---------|---------|---------|---------|---------|
| [ $\mu\text{M}$ ] | 1-30                             | 31-60 | 61-90 | 91-120 | 121-150 | 151-180 | 181-210 | 211-240 | 241-270 | 271-300 |
| 1                 | 0.025                            | 0.053 | 0.707 | 0.365  | 0.217   | 0.163   | 0.512   | 0.333   | 0.992   | 0.697   |
| 10                | 0.309                            | 0.959 | 0.991 | 0.481  | 0.230   | 0.891   | 0.427   | 0.558   | 0.975   | 0.998   |
| 100               | 0.002                            | 0.080 | 0.025 | 0.002  | 0.001   | 0.001   | 0.002   | 0.001   | 0.022   | 0.001   |
| 1000              | 0.001                            | 0.001 | 0.001 | 0.001  | 0.001   | 0.001   | 0.001   | 0.001   | 0.001   | 0.001   |

Two-way repeated measures ANOVA, Tukey's post-hoc,  $p \leq 0.05$

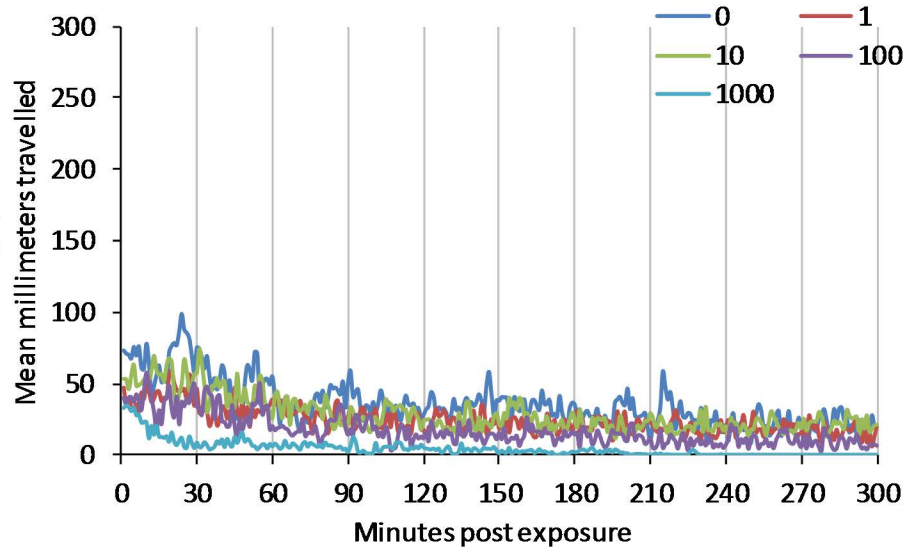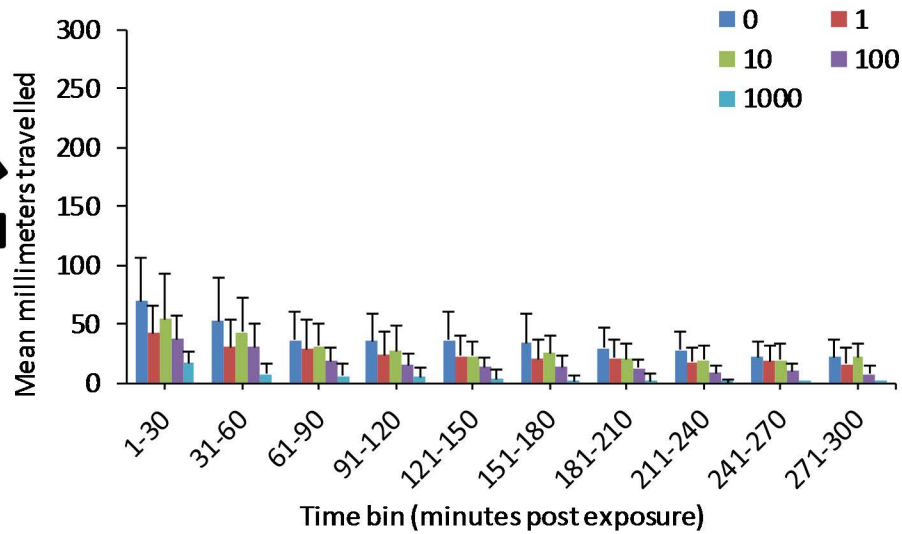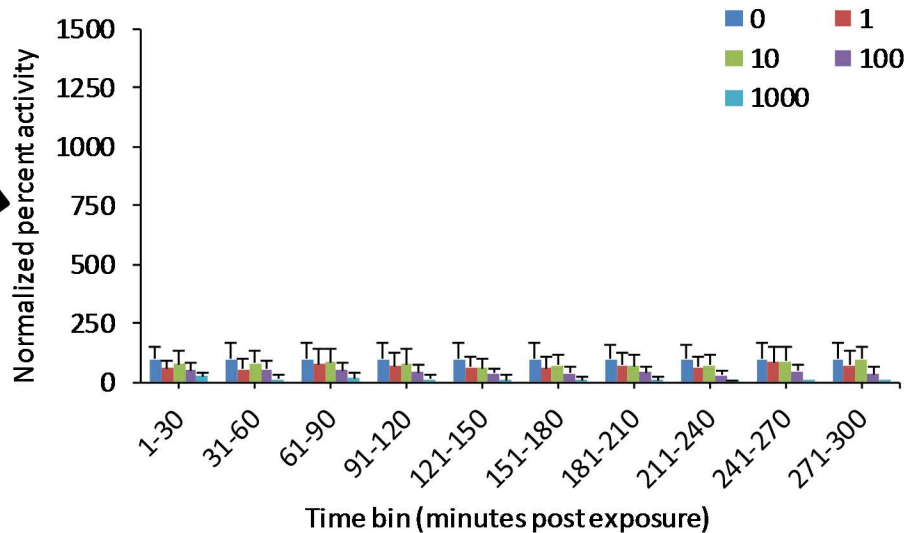

**CHEMICAL: CGP 13501**

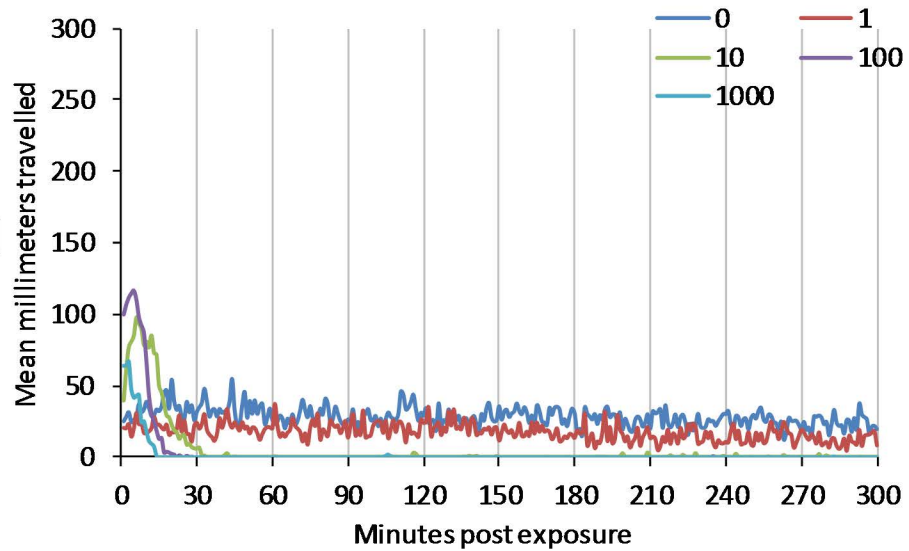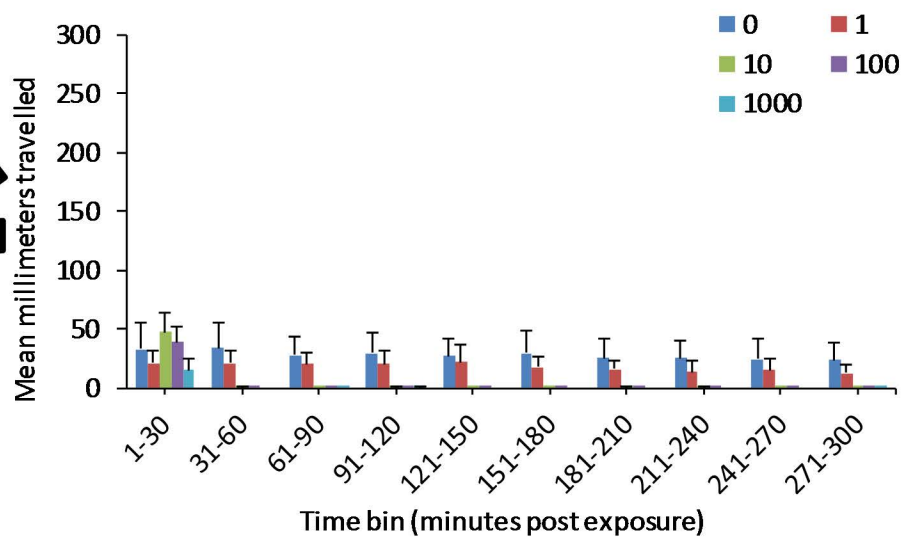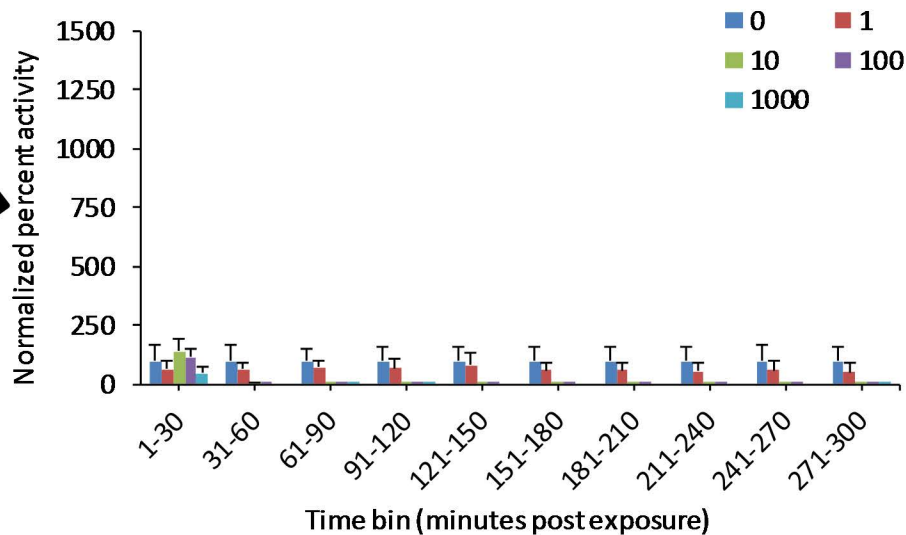

**Normalized percent activity**

| [μM] | Time bin (minutes post exposure) |          |          |          |          |          |          |          |          |          | N  |
|------|----------------------------------|----------|----------|----------|----------|----------|----------|----------|----------|----------|----|
|      | 1-30                             | 31-60    | 61-90    | 91-120   | 121-150  | 151-180  | 181-210  | 211-240  | 241-270  | 271-300  |    |
| 0    | 100 ± 65                         | 100 ± 64 | 100 ± 51 | 100 ± 59 | 100 ± 58 | 100 ± 62 | 100 ± 60 | 100 ± 61 | 100 ± 68 | 100 ± 63 | 16 |
| 1    | 63 ± 34                          | 62 ± 32  | 71 ± 32  | 70 ± 36  | 81 ± 57  | 59 ± 33  | 62 ± 29  | 55 ± 36  | 62 ± 39  | 53 ± 35  | 16 |
| 10   | 142 ± 50                         | 1 ± 3    | 0 ± 0    | 1 ± 2    | 0 ± 1    | 0 ± 0    | 1 ± 2    | 1 ± 2    | 0 ± 1    | 0 ± 1    | 15 |
| 100  | 117 ± 38                         | 0 ± 0    | 0 ± 0    | 0 ± 0    | 0 ± 0    | 0 ± 0    | 0 ± 0    | 0 ± 0    | 0 ± 0    | 0 ± 0    | 16 |
| 1000 | 47 ± 27                          | 0 ± 0    | 0 ± 0    | 0 ± 1    | 0 ± 0    | 0 ± 0    | 0 ± 0    | 0 ± 0    | 0 ± 0    | 0 ± 0    | 16 |

**Mean ± standard deviation**

**Normalized percent activity**

| [μM] | Time bin (minutes post exposure) |        |        |        |         |         |         |         |         |         |
|------|----------------------------------|--------|--------|--------|---------|---------|---------|---------|---------|---------|
|      | 1-30                             | 31-60  | 61-90  | 91-120 | 121-150 | 151-180 | 181-210 | 211-240 | 241-270 | 271-300 |
| 0    | 67-133                           | 68-132 | 74-126 | 70-130 | 71-129  | 69-131  | 70-130  | 70-130  | 66-134  | 69-131  |
| 1    | 46-80                            | 46-79  | 55-88  | 52-88  | 52-109  | 43-76   | 48-76   | 37-73   | 43-81   | 35-70   |
| 10   | 117-168                          | 0-3    | 0-0    | 0-2    | 0-1     | 0-0     | 0-2     | 0-2     | 0-1     | 0-1     |
| 100  | 98-136                           | 0-0    | 0-0    | 0-0    | 0-0     | 0-0     | 0-0     | 0-0     | 0-0     | 0-0     |
| 1000 | 33-60                            | 0-0    | 0-0    | 0-1    | 0-0     | 0-0     | 0-0     | 0-0     | 0-0     | 0-0     |

**95% confidence interval**

**p-values**

| [μM] | Time bin (minutes post exposure) |       |       |        |         |         |         |         |         |         |
|------|----------------------------------|-------|-------|--------|---------|---------|---------|---------|---------|---------|
|      | 1-30                             | 31-60 | 61-90 | 91-120 | 121-150 | 151-180 | 181-210 | 211-240 | 241-270 | 271-300 |
| 1    | 0.069                            | 0.206 | 0.621 | 0.799  | 0.717   | 0.304   | 0.661   | 0.177   | 0.550   | 0.095   |
| 10   | 0.170                            | 0.001 | 0.001 | 0.001  | 0.001   | 0.001   | 0.001   | 0.001   | 0.001   | 0.001   |
| 100  | 0.459                            | 0.001 | 0.001 | 0.001  | 0.001   | 0.001   | 0.001   | 0.001   | 0.001   | 0.001   |
| 1000 | 0.023                            | 0.001 | 0.001 | 0.001  | 0.001   | 0.001   | 0.001   | 0.001   | 0.001   | 0.001   |

Two-way repeated measures ANOVA, Tukey's post-hoc,  $p \leq 0.05$

# CHEMICAL: Chlormethiazole

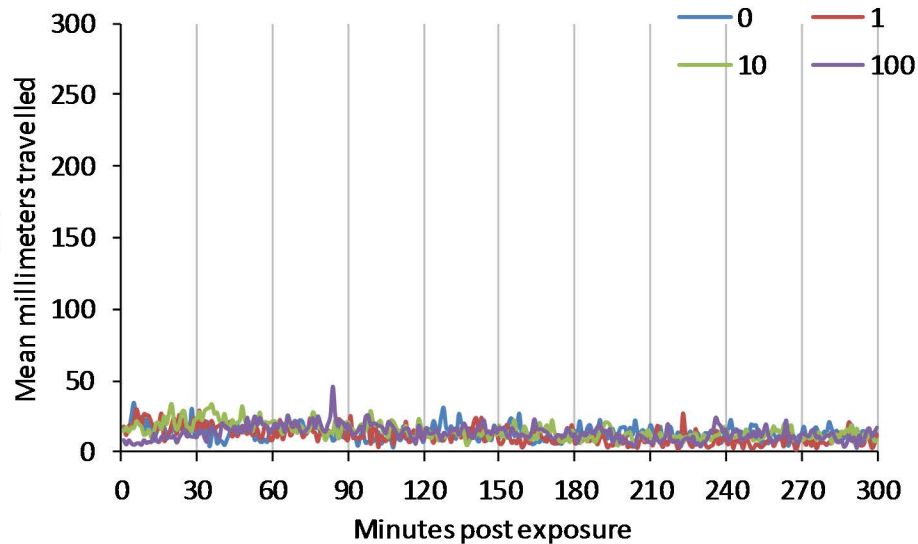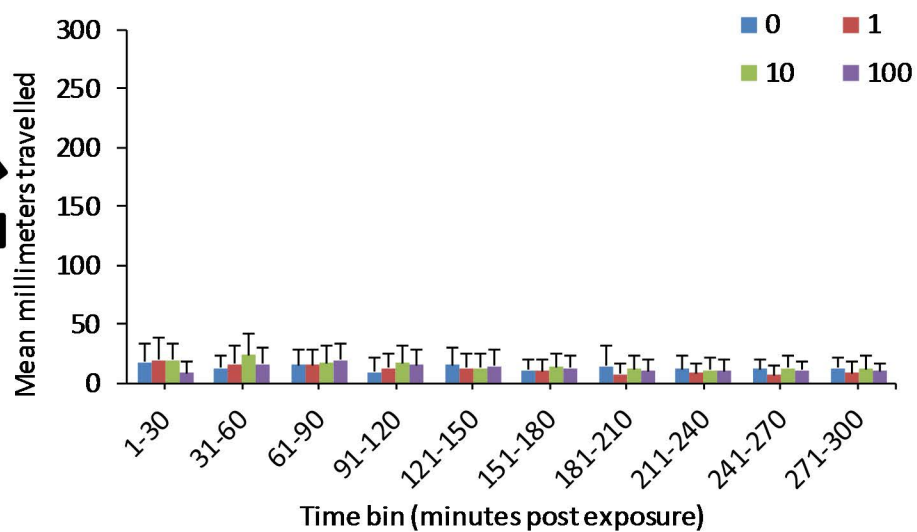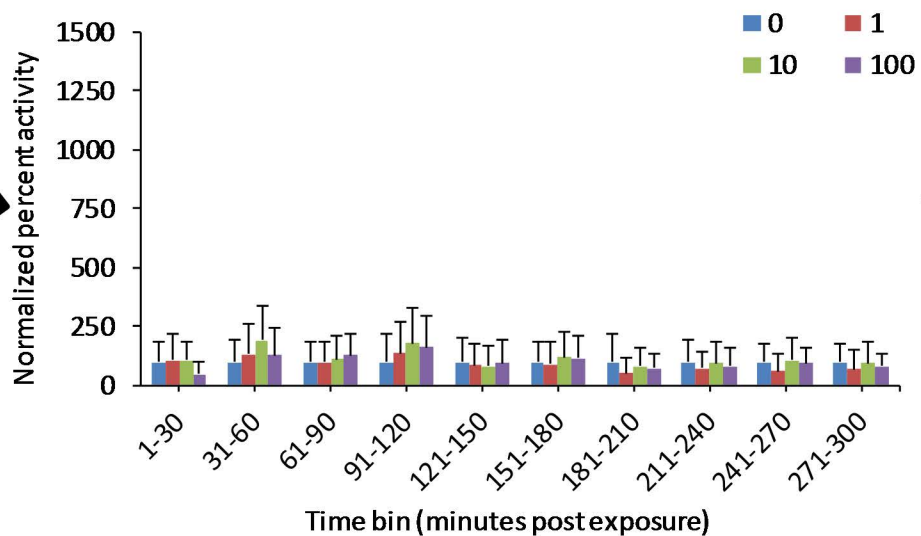

## Normalized percent activity

| [μM] | Time bin (minutes post exposure) |           |          |           |           |           |           |          |          |          | N  |
|------|----------------------------------|-----------|----------|-----------|-----------|-----------|-----------|----------|----------|----------|----|
|      | 1-30                             | 31-60     | 61-90    | 91-120    | 121-150   | 151-180   | 181-210   | 211-240  | 241-270  | 271-300  |    |
| 0    | 100 ± 82                         | 100 ± 90  | 100 ± 84 | 100 ± 120 | 100 ± 101 | 100 ± 82  | 100 ± 121 | 100 ± 94 | 100 ± 76 | 100 ± 75 | 23 |
| 1    | 109 ± 109                        | 132 ± 131 | 97 ± 91  | 137 ± 130 | 85 ± 88   | 89 ± 95   | 53 ± 68   | 72 ± 71  | 58 ± 74  | 68 ± 81  | 21 |
| 10   | 108 ± 78                         | 190 ± 148 | 111 ± 98 | 178 ± 148 | 83 ± 82   | 118 ± 107 | 82 ± 76   | 92 ± 91  | 105 ± 93 | 93 ± 93  | 22 |
| 100  | 47 ± 54                          | 128 ± 119 | 128 ± 90 | 160 ± 137 | 96 ± 95   | 114 ± 95  | 73 ± 62   | 83 ± 79  | 94 ± 66  | 81 ± 57  | 24 |

## Mean ± standard deviation

‡ Exclusion: lethality observed in 1000 μM treatment group (24 of 24 animals)

## Normalized percent activity

| [μM] | Time bin (minutes post exposure) |         |        |         |         |         |         |         |         |         |
|------|----------------------------------|---------|--------|---------|---------|---------|---------|---------|---------|---------|
|      | 1-30                             | 31-60   | 61-90  | 91-120  | 121-150 | 151-180 | 181-210 | 211-240 | 241-270 | 271-300 |
| 0    | 66-134                           | 62-138  | 65-135 | 50-150  | 58-142  | 66-134  | 50-150  | 61-139  | 68-132  | 69-131  |
| 1    | 61-156                           | 75-190  | 58-137 | 81-194  | 46-123  | 48-130  | 23-82   | 41-103  | 26-90   | 33-103  |
| 10   | 75-141                           | 127-253 | 69-153 | 115-241 | 48-118  | 72-164  | 49-115  | 54-131  | 66-145  | 53-133  |
| 100  | 25-69                            | 79-177  | 92-165 | 104-216 | 57-135  | 75-153  | 47-98   | 51-115  | 67-121  | 58-105  |

## 95% confidence interval

## p-values

| [μM] | Time bin (minutes post exposure) |       |       |        |         |         |         |         |         |         |
|------|----------------------------------|-------|-------|--------|---------|---------|---------|---------|---------|---------|
|      | 1-30                             | 31-60 | 61-90 | 91-120 | 121-150 | 151-180 | 181-210 | 211-240 | 241-270 | 271-300 |
| 1    | 0.947                            | 0.918 | 0.929 | 0.650  | 0.847   | 0.915   | 0.290   | 0.802   | 0.147   | 0.335   |
| 10   | 0.973                            | 0.071 | 0.999 | 0.058  | 0.934   | 0.891   | 1.000   | 0.983   | 1.000   | 0.966   |
| 100  | 0.016                            | 0.899 | 0.734 | 0.254  | 0.999   | 0.992   | 0.956   | 0.922   | 0.994   | 0.953   |

Two-way repeated measures ANOVA, Tukey's post-hoc,  $p \leq 0.05$

# CHEMICAL: Ethanol

## Normalized percent activity

## Time bin (minutes post exposure)

| [ $\mu\text{M}$ ] | 1-30         | 31-60         | 61-90         | 91-120        | 121-150       | 151-180       | 181-210       | 211-240       | 241-270       | 271-300       | N  |
|-------------------|--------------|---------------|---------------|---------------|---------------|---------------|---------------|---------------|---------------|---------------|----|
| 0                 | 100 $\pm$ 88 | 100 $\pm$ 94  | 100 $\pm$ 118 | 100 $\pm$ 139 | 100 $\pm$ 159 | 100 $\pm$ 155 | 100 $\pm$ 173 | 100 $\pm$ 155 | 100 $\pm$ 140 | 100 $\pm$ 80  | 16 |
| 1                 | 74 $\pm$ 57  | 134 $\pm$ 124 | 111 $\pm$ 96  | 66 $\pm$ 63   | 92 $\pm$ 93   | 51 $\pm$ 29   | 97 $\pm$ 128  | 63 $\pm$ 52   | 100 $\pm$ 151 | 332 $\pm$ 531 | 16 |
| 10                | 67 $\pm$ 70  | 124 $\pm$ 181 | 63 $\pm$ 58   | 75 $\pm$ 99   | 93 $\pm$ 147  | 31 $\pm$ 23   | 52 $\pm$ 46   | 44 $\pm$ 48   | 85 $\pm$ 140  | 94 $\pm$ 85   | 16 |
| 100               | 78 $\pm$ 104 | 76 $\pm$ 89   | 70 $\pm$ 68   | 42 $\pm$ 36   | 91 $\pm$ 103  | 78 $\pm$ 110  | 89 $\pm$ 160  | 50 $\pm$ 52   | 58 $\pm$ 67   | 122 $\pm$ 137 | 16 |
| 1000              | 85 $\pm$ 92  | 61 $\pm$ 63   | 126 $\pm$ 137 | 70 $\pm$ 57   | 50 $\pm$ 43   | 51 $\pm$ 36   | 100 $\pm$ 164 | 70 $\pm$ 53   | 61 $\pm$ 59   | 182 $\pm$ 218 | 16 |

## Mean $\pm$ standard deviation

## Normalized percent activity

## Time bin (minutes post exposure)

| [ $\mu\text{M}$ ] | 1-30   | 31-60  | 61-90  | 91-120 | 121-150 | 151-180 | 181-210 | 211-240 | 241-270 | 271-300 |
|-------------------|--------|--------|--------|--------|---------|---------|---------|---------|---------|---------|
| 0                 | 56-144 | 53-147 | 41-159 | 31-169 | 20-180  | 22-178  | 14-186  | 23-177  | 30-170  | 60-140  |
| 1                 | 45-102 | 72-196 | 63-159 | 35-98  | 45-138  | 37-66   | 33-161  | 37-89   | 24-175  | 67-598  |
| 10                | 32-102 | 34-215 | 34-92  | 26-125 | 19-167  | 19-43   | 29-75   | 20-68   | 15-155  | 52-137  |
| 100               | 26-130 | 32-121 | 36-104 | 24-60  | 40-143  | 22-133  | 9-169   | 24-76   | 25-92   | 54-191  |
| 1000              | 39-131 | 30-93  | 58-195 | 41-98  | 29-72   | 33-69   | 18-182  | 44-97   | 32-91   | 73-291  |

## 95% confidence interval

## p-values

## Time bin (minutes post exposure)

| [ $\mu\text{M}$ ] | 1-30  | 31-60 | 61-90 | 91-120 | 121-150 | 151-180 | 181-210 | 211-240 | 241-270 | 271-300 |
|-------------------|-------|-------|-------|--------|---------|---------|---------|---------|---------|---------|
| 1                 | 0.985 | 0.749 | 0.944 | 0.999  | 0.959   | 0.992   | 0.986   | 0.998   | 0.996   | 0.221   |
| 10                | 0.571 | 1.000 | 0.968 | 1.000  | 0.971   | 0.609   | 0.972   | 0.560   | 1.000   | 0.999   |
| 100               | 0.572 | 0.944 | 1.000 | 0.963  | 0.999   | 1.000   | 0.975   | 0.601   | 0.977   | 1.000   |
| 1000              | 0.976 | 0.570 | 0.988 | 0.993  | 0.813   | 0.976   | 1.000   | 1.000   | 0.993   | 0.837   |

Two-way repeated measures ANOVA, Tukey's post-hoc,  $p \leq 0.05$

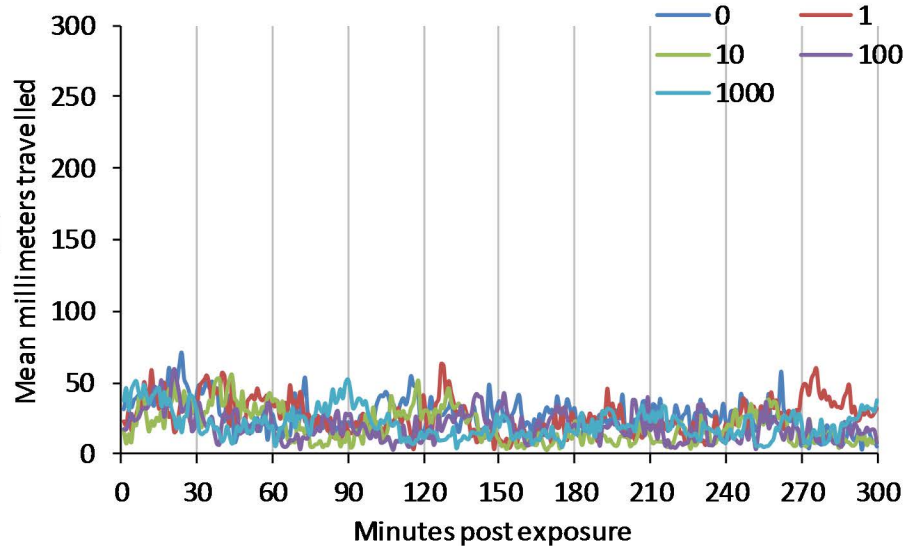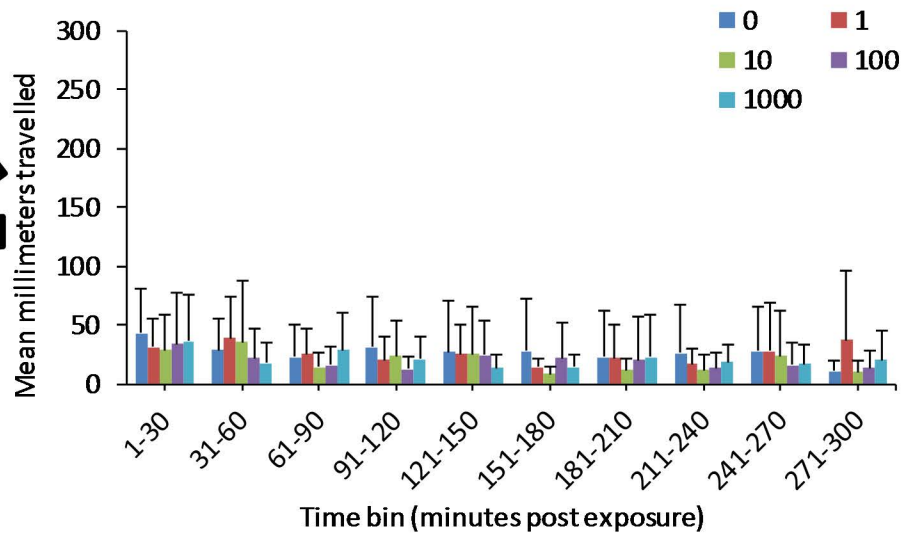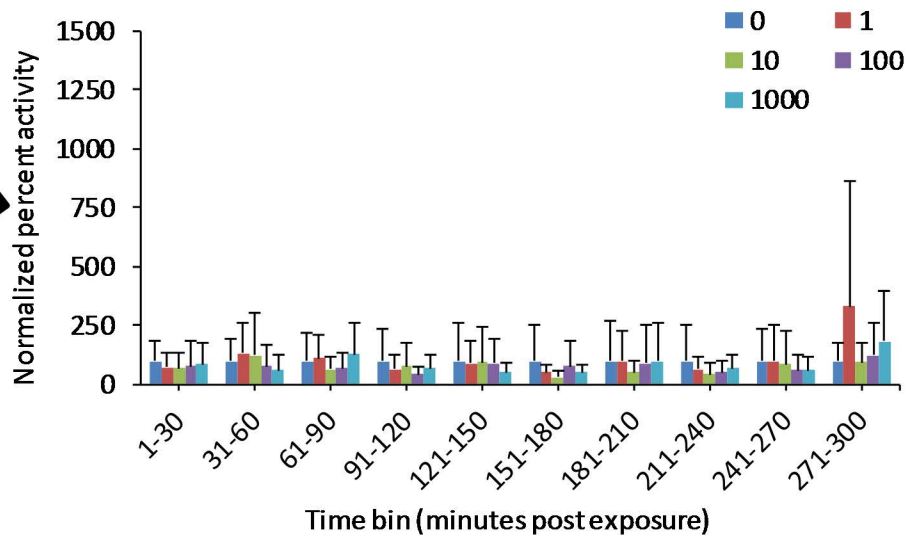



# CHEMICAL: gamma-Aminobutyric Acid (GABA)

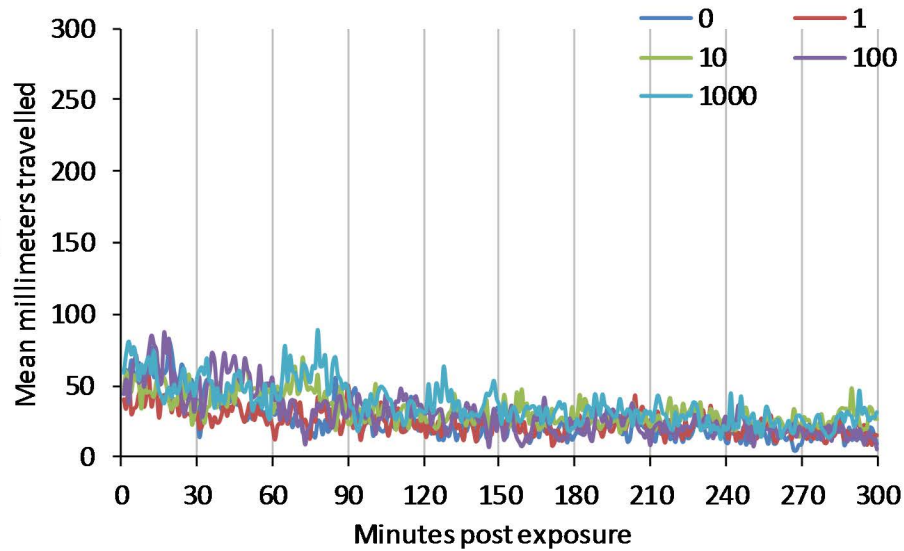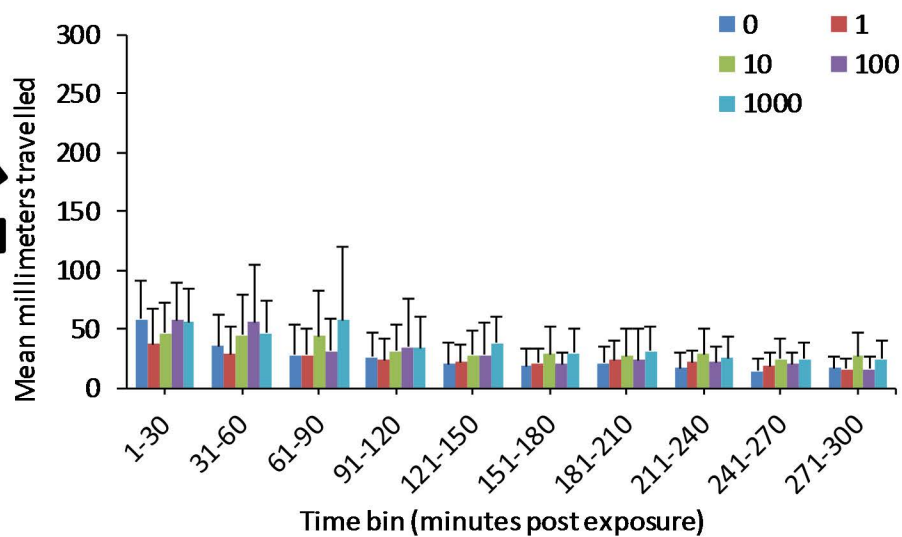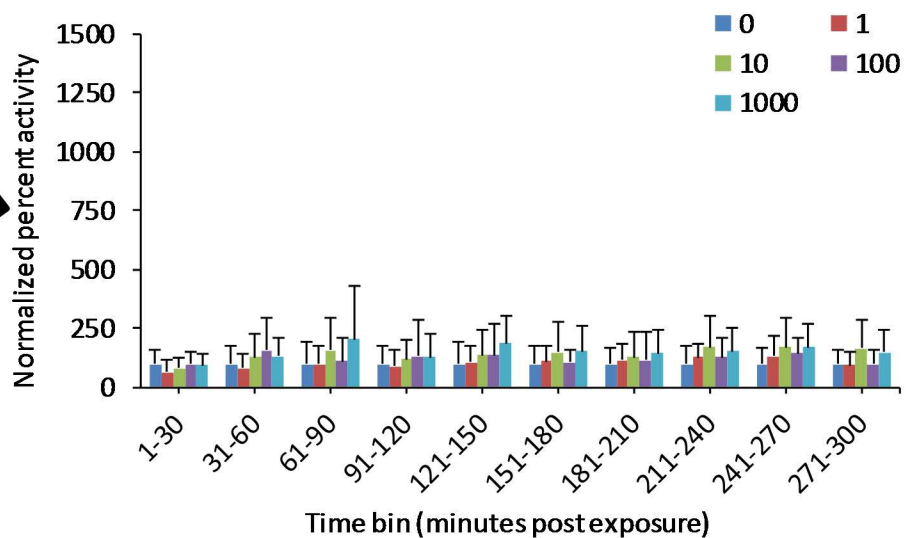

## Normalized percent activity

| [μM] | Time bin (minutes post exposure) |           |           |           |           |           |           |           |           |           | N  |
|------|----------------------------------|-----------|-----------|-----------|-----------|-----------|-----------|-----------|-----------|-----------|----|
|      | 1-30                             | 31-60     | 61-90     | 91-120    | 121-150   | 151-180   | 181-210   | 211-240   | 241-270   | 271-300   |    |
| 0    | 100 ± 56                         | 100 ± 74  | 100 ± 92  | 100 ± 79  | 100 ± 91  | 100 ± 79  | 100 ± 65  | 100 ± 76  | 100 ± 71  | 100 ± 60  | 23 |
| 1    | 64 ± 51                          | 82 ± 63   | 100 ± 78  | 90 ± 66   | 108 ± 70  | 110 ± 69  | 113 ± 76  | 129 ± 57  | 130 ± 84  | 95 ± 57   | 22 |
| 10   | 79 ± 44                          | 127 ± 100 | 158 ± 138 | 119 ± 85  | 138 ± 105 | 151 ± 124 | 128 ± 107 | 170 ± 131 | 171 ± 121 | 165 ± 123 | 20 |
| 100  | 98 ± 56                          | 157 ± 138 | 113 ± 99  | 132 ± 152 | 137 ± 135 | 108 ± 50  | 113 ± 121 | 129 ± 79  | 144 ± 67  | 98 ± 57   | 23 |
| 1000 | 96 ± 50                          | 133 ± 79  | 206 ± 222 | 128 ± 100 | 139 ± 112 | 155 ± 109 | 146 ± 101 | 152 ± 106 | 171 ± 98  | 150 ± 91  | 19 |

## Mean ± standard deviation

## Normalized percent activity

| [μM] | Time bin (minutes post exposure) |         |         |        |         |         |         |         |         |         |
|------|----------------------------------|---------|---------|--------|---------|---------|---------|---------|---------|---------|
|      | 1-30                             | 31-60   | 61-90   | 91-120 | 121-150 | 151-180 | 181-210 | 211-240 | 241-270 | 271-300 |
| 0    | 77-123                           | 69-131  | 62-138  | 67-133 | 62-138  | 67-133  | 73-127  | 68-132  | 70-130  | 75-125  |
| 1    | 42-86                            | 55-109  | 66-133  | 62-118 | 78-138  | 81-140  | 81-145  | 105-153 | 94-167  | 70-119  |
| 10   | 60-99                            | 82-171  | 96-220  | 81-157 | 92-185  | 95-207  | 81-176  | 112-228 | 116-225 | 110-220 |
| 100  | 75-121                           | 100-215 | 72-154  | 69-196 | 81-193  | 87-129  | 63-164  | 97-162  | 116-172 | 74-122  |
| 1000 | 73-119                           | 97-169  | 104-308 | 82-173 | 137-240 | 105-205 | 100-192 | 103-200 | 126-217 | 108-192 |

## 95% confidence interval

## p-values

| [μM] | Time bin (minutes post exposure) |       |       |        |         |         |         |         |         |         |
|------|----------------------------------|-------|-------|--------|---------|---------|---------|---------|---------|---------|
|      | 1-30                             | 31-60 | 61-90 | 91-120 | 121-150 | 151-180 | 181-210 | 211-240 | 241-270 | 271-300 |
| 1    | 0.046                            | 0.926 | 0.957 | 1.000  | 0.763   | 0.819   | 0.926   | 0.504   | 0.473   | 1.000   |
| 10   | 0.763                            | 0.741 | 0.042 | 0.944  | 0.521   | 0.471   | 0.882   | 0.161   | 0.130   | 0.270   |
| 100  | 1.000                            | 0.154 | 0.786 | 0.632  | 0.482   | 0.745   | 0.999   | 0.668   | 0.199   | 1.000   |
| 1000 | 1.000                            | 0.332 | 0.010 | 0.843  | 0.011   | 0.277   | 0.618   | 0.439   | 0.083   | 0.394   |

Two-way repeated measures ANOVA, Tukey's post-hoc,  $p \leq 0.05$

# CHEMICAL: Muscimol

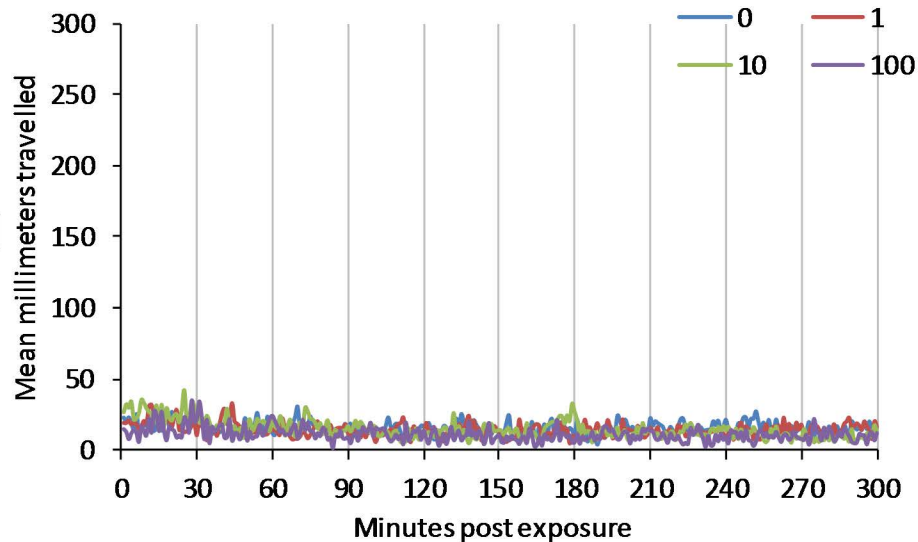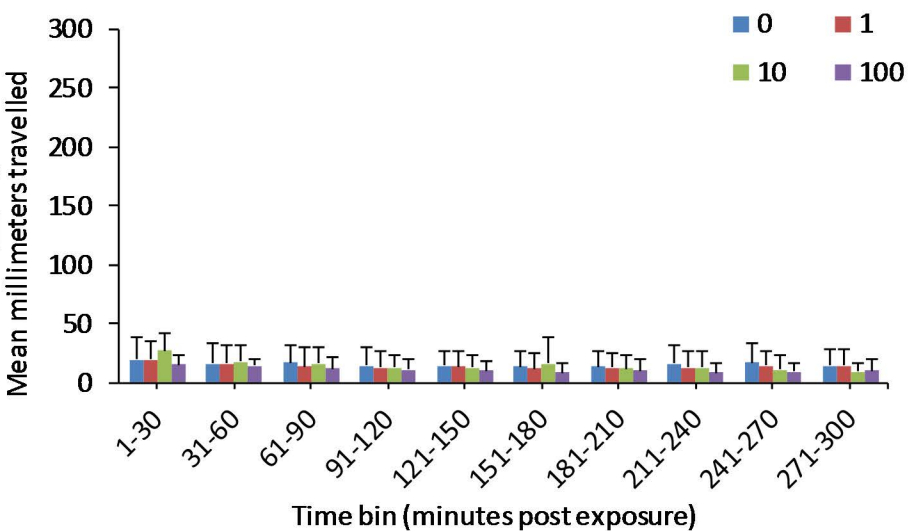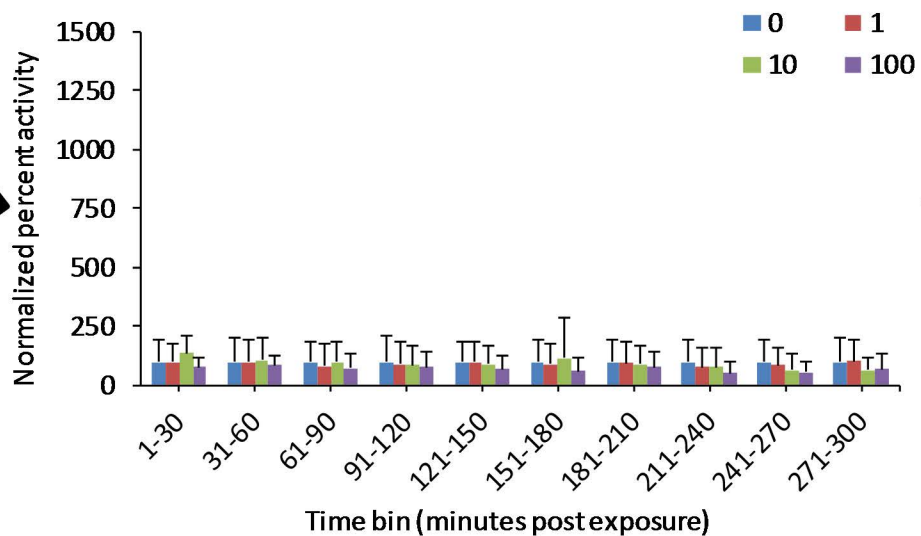

## Normalized percent activity

| [μM] | Time bin (minutes post exposure) |           |          |           |          |           |          |          |          |          | N  |
|------|----------------------------------|-----------|----------|-----------|----------|-----------|----------|----------|----------|----------|----|
|      | 1-30                             | 31-60     | 61-90    | 91-120    | 121-150  | 151-180   | 181-210  | 211-240  | 241-270  | 271-300  |    |
| 0    | 100 ± 93                         | 100 ± 103 | 100 ± 88 | 100 ± 107 | 100 ± 88 | 100 ± 96  | 100 ± 93 | 100 ± 95 | 100 ± 98 | 100 ± 99 | 24 |
| 1    | 98 ± 81                          | 100 ± 95  | 80 ± 96  | 88 ± 94   | 96 ± 89  | 90 ± 90   | 93 ± 90  | 79 ± 84  | 84 ± 77  | 102 ± 95 | 24 |
| 10   | 137 ± 77                         | 108 ± 92  | 99 ± 84  | 86 ± 79   | 89 ± 78  | 116 ± 172 | 88 ± 79  | 76 ± 86  | 66 ± 70  | 63 ± 52  | 24 |
| 100  | 79 ± 41                          | 87 ± 36   | 73 ± 61  | 79 ± 64   | 70 ± 52  | 61 ± 60   | 76 ± 65  | 54 ± 46  | 57 ± 41  | 70 ± 63  | 23 |

## Mean ± standard deviation

‡ Exclusion: lethality observed in 1000 μM treatment group (24 of 24 animals)

## Normalized percent activity

| [μM] | Time bin (minutes post exposure) |        |        |        |         |         |         |         |         |         |
|------|----------------------------------|--------|--------|--------|---------|---------|---------|---------|---------|---------|
|      | 1-30                             | 31-60  | 61-90  | 91-120 | 121-150 | 151-180 | 181-210 | 211-240 | 241-270 | 271-300 |
| 0    | 62-138                           | 58-142 | 64-136 | 56-144 | 64-136  | 61-139  | 62-138  | 61-139  | 60-140  | 60-140  |
| 1    | 65-132                           | 61-138 | 40-119 | 49-126 | 60-133  | 54-127  | 56-130  | 45-113  | 53-115  | 64-141  |
| 10   | 105-168                          | 71-146 | 64-133 | 54-119 | 57-121  | 46-186  | 56-120  | 41-111  | 38-95   | 41-84   |
| 100  | 61-96                            | 72-102 | 47-98  | 52-105 | 49-92   | 36-86   | 49-103  | 34-73   | 39-74   | 44-96   |

## 95% confidence interval

## p-values

| [μM] | Time bin (minutes post exposure) |       |       |        |         |         |         |         |         |         |
|------|----------------------------------|-------|-------|--------|---------|---------|---------|---------|---------|---------|
|      | 1-30                             | 31-60 | 61-90 | 91-120 | 121-150 | 151-180 | 181-210 | 211-240 | 241-270 | 271-300 |
| 1    | 0.999                            | 0.998 | 0.568 | 0.979  | 0.992   | 1.000   | 1.000   | 0.908   | 0.986   | 1.000   |
| 10   | 0.116                            | 0.692 | 0.998 | 0.996  | 1.000   | 0.998   | 0.999   | 0.900   | 0.766   | 0.830   |
| 100  | 1.000                            | 0.842 | 0.902 | 1.000  | 0.893   | 0.565   | 0.970   | 0.548   | 0.788   | 0.933   |

Two-way repeated measures ANOVA, Tukey's post-hoc,  $p \leq 0.05$

**CHEMICAL: SKF 97541 (CGP 35024)**

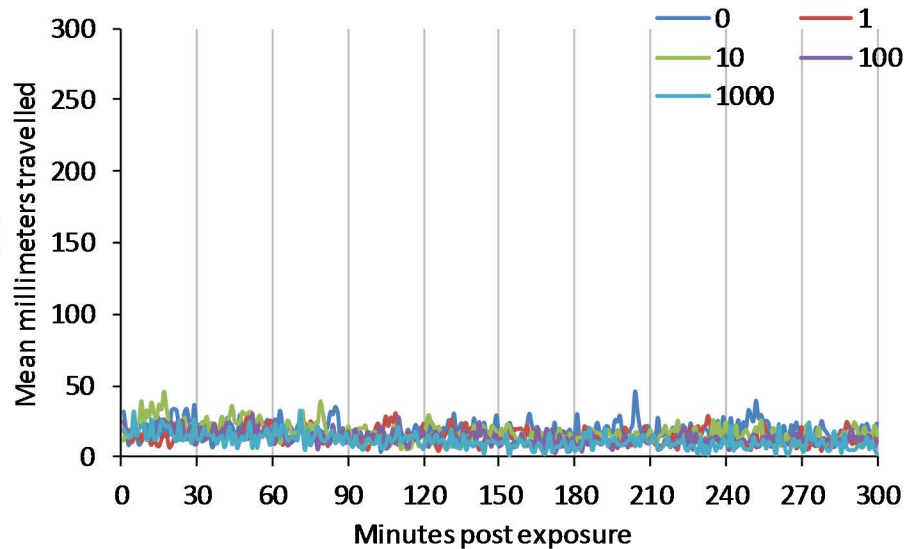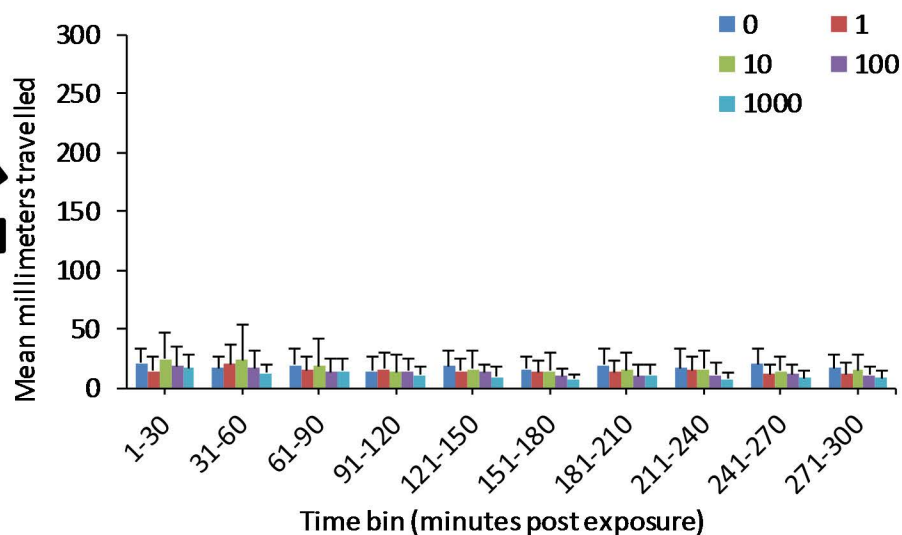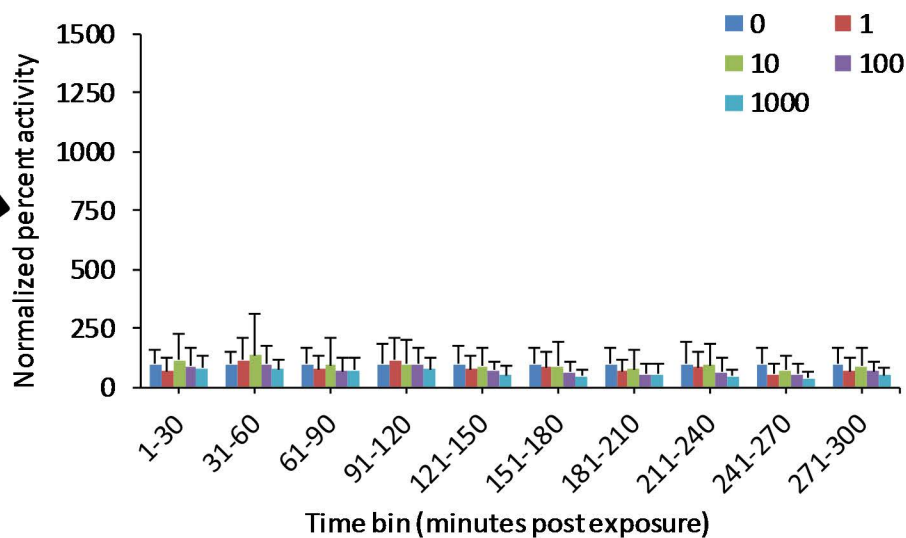

**Normalized percent activity**

|            | Time bin (minutes post exposure) |               |              |              |              |              |              |              |              |              |    |
|------------|----------------------------------|---------------|--------------|--------------|--------------|--------------|--------------|--------------|--------------|--------------|----|
| [ $\mu$ M] | 1-30                             | 31-60         | 61-90        | 91-120       | 121-150      | 151-180      | 181-210      | 211-240      | 241-270      | 271-300      | N  |
| 0          | 100 $\pm$ 56                     | 100 $\pm$ 52  | 100 $\pm$ 67 | 100 $\pm$ 83 | 100 $\pm$ 75 | 100 $\pm$ 70 | 100 $\pm$ 70 | 100 $\pm$ 91 | 100 $\pm$ 66 | 100 $\pm$ 65 | 16 |
| 1          | 67 $\pm$ 62                      | 117 $\pm$ 94  | 76 $\pm$ 56  | 115 $\pm$ 97 | 75 $\pm$ 61  | 85 $\pm$ 66  | 69 $\pm$ 47  | 86 $\pm$ 65  | 58 $\pm$ 41  | 69 $\pm$ 57  | 15 |
| 10         | 115 $\pm$ 111                    | 136 $\pm$ 179 | 94 $\pm$ 115 | 97 $\pm$ 102 | 88 $\pm$ 84  | 90 $\pm$ 102 | 78 $\pm$ 81  | 94 $\pm$ 90  | 71 $\pm$ 63  | 89 $\pm$ 80  | 14 |
| 100        | 90 $\pm$ 80                      | 98 $\pm$ 81   | 68 $\pm$ 59  | 99 $\pm$ 73  | 71 $\pm$ 39  | 66 $\pm$ 38  | 55 $\pm$ 45  | 65 $\pm$ 63  | 56 $\pm$ 44  | 68 $\pm$ 42  | 16 |
| 1000       | 82 $\pm$ 55                      | 76 $\pm$ 42   | 74 $\pm$ 50  | 76 $\pm$ 54  | 52 $\pm$ 44  | 47 $\pm$ 30  | 55 $\pm$ 46  | 46 $\pm$ 28  | 41 $\pm$ 29  | 50 $\pm$ 34  | 16 |

**Mean  $\pm$  standard deviation**

**Normalized percent activity**

|            | Time bin (minutes post exposure) |        |        |        |         |         |         |         |         |         |
|------------|----------------------------------|--------|--------|--------|---------|---------|---------|---------|---------|---------|
| [ $\mu$ M] | 1-30                             | 31-60  | 61-90  | 91-120 | 121-150 | 151-180 | 181-210 | 211-240 | 241-270 | 271-300 |
| 0          | 72-128                           | 74-126 | 67-133 | 58-142 | 62-138  | 65-135  | 65-135  | 54-146  | 67-133  | 67-133  |
| 1          | 35-99                            | 68-165 | 47-105 | 65-165 | 44-107  | 51-119  | 45-94   | 52-119  | 37-79   | 40-99   |
| 10         | 56-174                           | 41-232 | 33-166 | 42-151 | 43-133  | 35-144  | 35-122  | 46-142  | 37-105  | 46-131  |
| 100        | 50-131                           | 57-138 | 39-98  | 63-136 | 52-91   | 47-86   | 32-77   | 34-96   | 34-78   | 47-89   |
| 1000       | 54-110                           | 54-97  | 49-99  | 49-103 | 30-74   | 32-62   | 32-79   | 32-60   | 27-55   | 33-68   |

**95% confidence interval**

**p-values**

|            | Time bin (minutes post exposure) |       |       |        |         |         |         |         |         |         |
|------------|----------------------------------|-------|-------|--------|---------|---------|---------|---------|---------|---------|
| [ $\mu$ M] | 1-30                             | 31-60 | 61-90 | 91-120 | 121-150 | 151-180 | 181-210 | 211-240 | 241-270 | 271-300 |
| 1          | 0.296                            | 1.000 | 0.795 | 0.994  | 0.840   | 0.992   | 0.795   | 1.000   | 0.251   | 0.591   |
| 10         | 0.962                            | 1.000 | 0.722 | 0.985  | 0.945   | 0.856   | 0.522   | 1.000   | 0.649   | 0.970   |
| 100        | 0.817                            | 0.991 | 0.508 | 1.000  | 0.961   | 0.862   | 0.172   | 0.708   | 0.226   | 0.791   |
| 1000       | 0.918                            | 0.859 | 0.788 | 0.929  | 0.250   | 0.291   | 0.191   | 0.605   | 0.036   | 0.246   |

**Two-way repeated measures ANOVA, Tukey's post-hoc,  $p \leq 0.05$**

# CHEMICAL: Valproic Acid

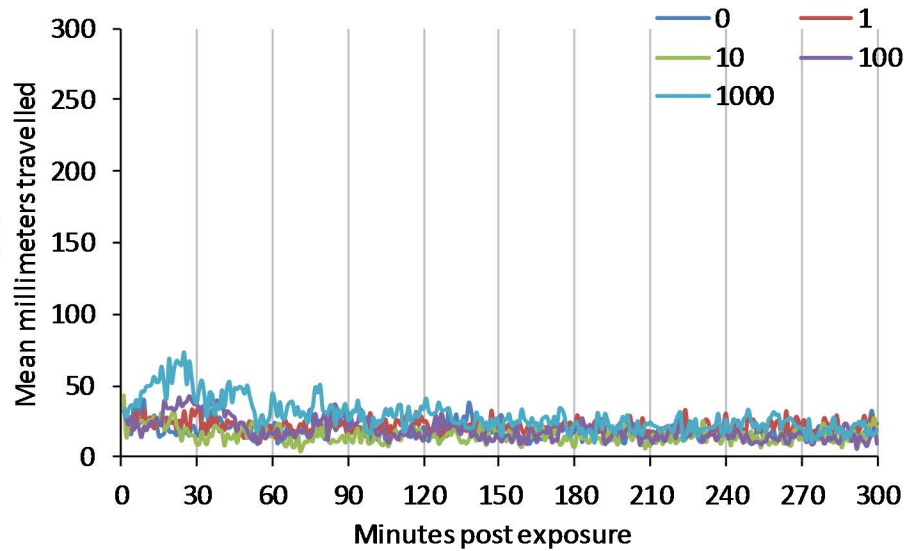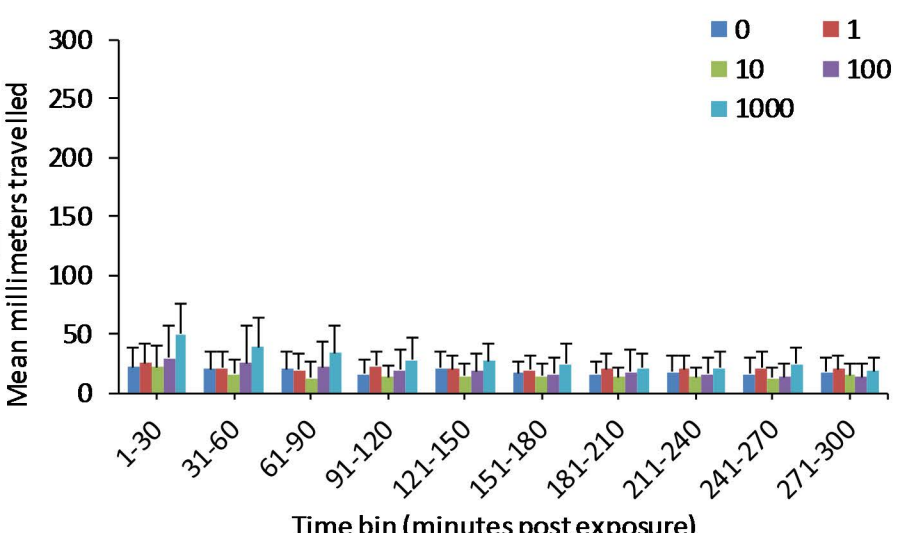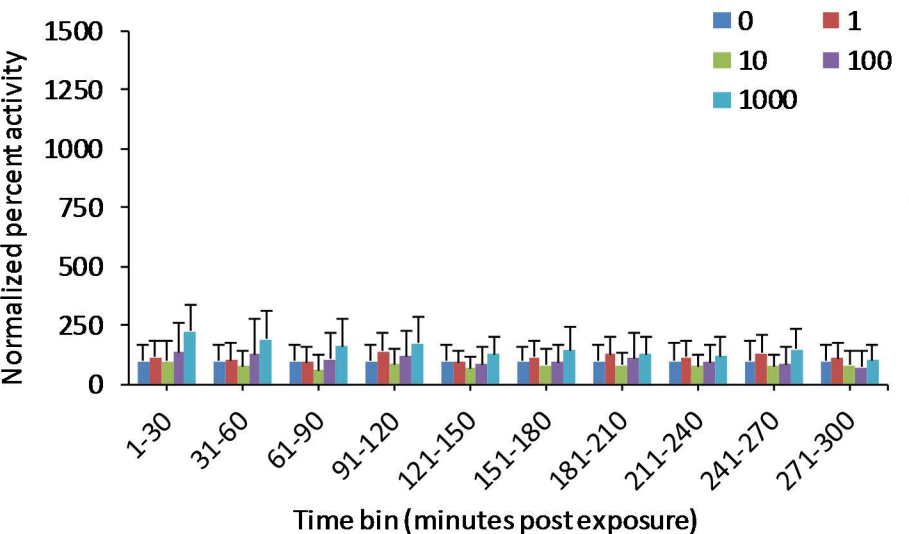

## Normalized percent activity

| [μM] | Time bin (minutes post exposure) |           |           |           |          |           |           |          |          |          | N  |
|------|----------------------------------|-----------|-----------|-----------|----------|-----------|-----------|----------|----------|----------|----|
|      | 1-30                             | 31-60     | 61-90     | 91-120    | 121-150  | 151-180   | 181-210   | 211-240  | 241-270  | 271-300  |    |
| 0    | 100 ± 71                         | 100 ± 71  | 100 ± 71  | 100 ± 72  | 100 ± 65 | 100 ± 60  | 100 ± 68  | 100 ± 77 | 100 ± 85 | 100 ± 70 | 19 |
| 1    | 115 ± 70                         | 102 ± 71  | 96 ± 65   | 141 ± 79  | 95 ± 52  | 117 ± 70  | 127 ± 78  | 114 ± 71 | 130 ± 82 | 111 ± 65 | 22 |
| 10   | 97 ± 86                          | 78 ± 63   | 61 ± 65   | 85 ± 63   | 68 ± 52  | 83 ± 68   | 81 ± 57   | 79 ± 49  | 78 ± 52  | 83 ± 57  | 20 |
| 100  | 135 ± 123                        | 126 ± 151 | 105 ± 110 | 119 ± 113 | 88 ± 71  | 92 ± 80   | 110 ± 112 | 92 ± 77  | 84 ± 72  | 74 ± 65  | 23 |
| 1000 | 224 ± 113                        | 190 ± 123 | 162 ± 117 | 173 ± 115 | 128 ± 73 | 145 ± 101 | 129 ± 75  | 119 ± 82 | 149 ± 86 | 102 ± 65 | 21 |

## Mean ± standard deviation

## Normalized percent activity

| [μM] | Time bin (minutes post exposure) |         |         |         |         |         |         |         |         |         |
|------|----------------------------------|---------|---------|---------|---------|---------|---------|---------|---------|---------|
|      | 1-30                             | 31-60   | 61-90   | 91-120  | 121-150 | 151-180 | 181-210 | 211-240 | 241-270 | 271-300 |
| 0    | 67-133                           | 67-133  | 68-132  | 67-133  | 70-130  | 72-128  | 69-131  | 64-136  | 61-139  | 68-132  |
| 1    | 85-145                           | 72-132  | 68-123  | 107-175 | 73-117  | 87-147  | 94-160  | 84-145  | 95-165  | 83-139  |
| 10   | 59-136                           | 49-106  | 32-91   | 57-113  | 44-91   | 52-113  | 56-106  | 57-100  | 54-101  | 57-108  |
| 100  | 83-186                           | 63-189  | 60-151  | 72-166  | 58-117  | 59-126  | 63-157  | 60-125  | 54-114  | 47-101  |
| 1000 | 175-274                          | 137-244 | 111-213 | 123-223 | 96-160  | 101-189 | 96-162  | 83-155  | 111-187 | 74-131  |

## 95% confidence interval

## p-values

| [μM] | Time bin (minutes post exposure) |       |       |        |         |         |         |         |         |         |
|------|----------------------------------|-------|-------|--------|---------|---------|---------|---------|---------|---------|
|      | 1-30                             | 31-60 | 61-90 | 91-120 | 121-150 | 151-180 | 181-210 | 211-240 | 241-270 | 271-300 |
| 1    | 0.942                            | 1.000 | 1.000 | 0.498  | 1.000   | 0.951   | 0.861   | 0.924   | 0.671   | 0.956   |
| 10   | 1.000                            | 0.831 | 0.284 | 0.997  | 0.647   | 0.961   | 0.947   | 0.997   | 0.987   | 0.981   |
| 100  | 0.942                            | 0.996 | 0.990 | 0.999  | 0.936   | 0.965   | 1.000   | 1.000   | 0.971   | 0.825   |
| 1000 | 0.001                            | 0.023 | 0.299 | 0.171  | 0.799   | 0.794   | 0.787   | 0.858   | 0.363   | 0.998   |

Two-way repeated measures ANOVA, Tukey's post-hoc,  $p \leq 0.05$

# GABA antagonists and negative modulators

**6 tested chemicals:**

Bicuculline

Dehydroisoandrosterone 3-sulfate sodium

Pentylentetrazol

Picrotoxin

Pregnenolone sulfate sodium

SCH 50911

# CHEMICAL: Bicuculline

## Normalized percent activity

## Time bin (minutes post exposure)

| [ $\mu$ M] | 1-30          | 31-60         | 61-90        | 91-120        | 121-150       | 151-180       | 181-210       | 211-240       | 241-270       | 271-300       | N  |
|------------|---------------|---------------|--------------|---------------|---------------|---------------|---------------|---------------|---------------|---------------|----|
| 0          | 100 $\pm$ 90  | 100 $\pm$ 109 | 100 $\pm$ 97 | 100 $\pm$ 98  | 100 $\pm$ 110 | 100 $\pm$ 99  | 100 $\pm$ 119 | 100 $\pm$ 122 | 100 $\pm$ 135 | 100 $\pm$ 90  | 24 |
| 1          | 139 $\pm$ 85  | 145 $\pm$ 106 | 120 $\pm$ 89 | 131 $\pm$ 106 | 146 $\pm$ 123 | 111 $\pm$ 100 | 153 $\pm$ 110 | 140 $\pm$ 109 | 154 $\pm$ 131 | 134 $\pm$ 97  | 23 |
| 10         | 814 $\pm$ 177 | 966 $\pm$ 108 | 732 $\pm$ 91 | 780 $\pm$ 132 | 767 $\pm$ 113 | 690 $\pm$ 104 | 861 $\pm$ 153 | 818 $\pm$ 170 | 945 $\pm$ 189 | 708 $\pm$ 116 | 23 |
| 100        | 335 $\pm$ 63  | 430 $\pm$ 85  | 500 $\pm$ 70 | 599 $\pm$ 93  | 517 $\pm$ 114 | 422 $\pm$ 86  | 541 $\pm$ 93  | 543 $\pm$ 80  | 666 $\pm$ 100 | 554 $\pm$ 85  | 23 |

## Mean $\pm$ standard deviation

<sup>‡</sup>Exclusion: lethality observed in 1000  $\mu$ M treatment group (24 of 24 animals)

## Normalized percent activity

## Time bin (minutes post exposure)

| [ $\mu$ M] | 1-30    | 31-60    | 61-90   | 91-120  | 121-150 | 151-180 | 181-210 | 211-240 | 241-270  | 271-300 |
|------------|---------|----------|---------|---------|---------|---------|---------|---------|----------|---------|
| 0          | 63-137  | 56-144   | 60-140  | 60-140  | 55-145  | 60-140  | 51-149  | 50-150  | 45-155   | 63-137  |
| 1          | 103-174 | 101-190  | 83-157  | 87-175  | 95-198  | 70-153  | 107-199 | 95-185  | 100-209  | 94-175  |
| 10         | 740-888 | 921-1011 | 694-770 | 725-835 | 720-814 | 647-733 | 797-925 | 747-889 | 866-1024 | 659-756 |
| 100        | 309-362 | 394-465  | 471-529 | 560-638 | 469-564 | 386-458 | 502-580 | 509-576 | 624-708  | 519-589 |

## 95% confidence interval

## p-values

## Time bin (minutes post exposure)

| [ $\mu$ M] | 1-30  | 31-60 | 61-90 | 91-120 | 121-150 | 151-180 | 181-210 | 211-240 | 241-270 | 271-300 |
|------------|-------|-------|-------|--------|---------|---------|---------|---------|---------|---------|
| 1          | 0.193 | 0.077 | 0.618 | 0.545  | 0.227   | 0.980   | 0.070   | 0.206   | 0.102   | 0.475   |
| 10         | 0.001 | 0.001 | 0.001 | 0.001  | 0.001   | 0.001   | 0.001   | 0.001   | 0.001   | 0.001   |
| 100        | 0.001 | 0.001 | 0.001 | 0.001  | 0.001   | 0.001   | 0.001   | 0.001   | 0.001   | 0.001   |

Two-way repeated measures ANOVA, Tukey's post-hoc,  $p \leq 0.05$

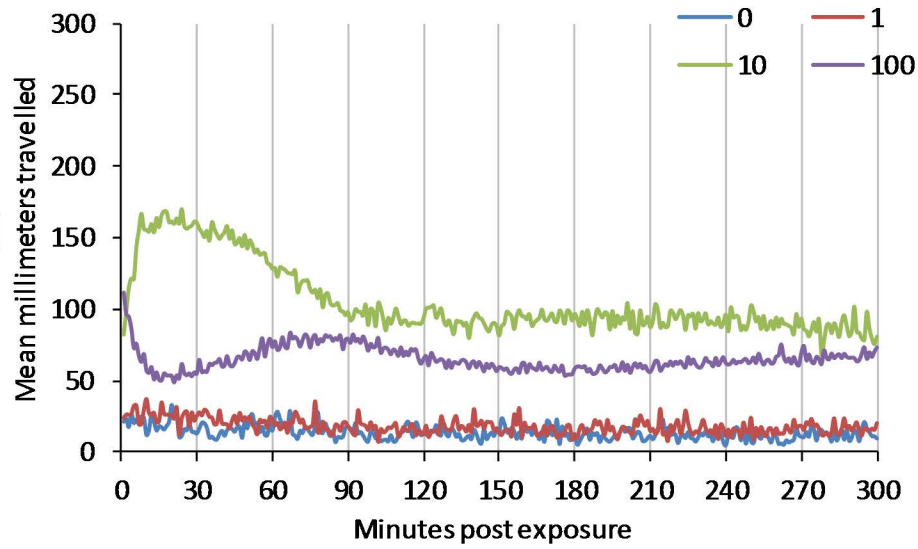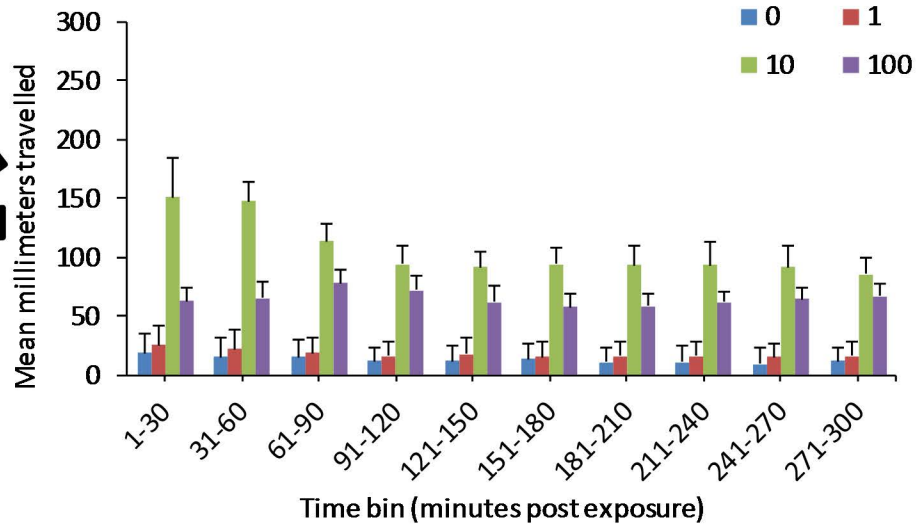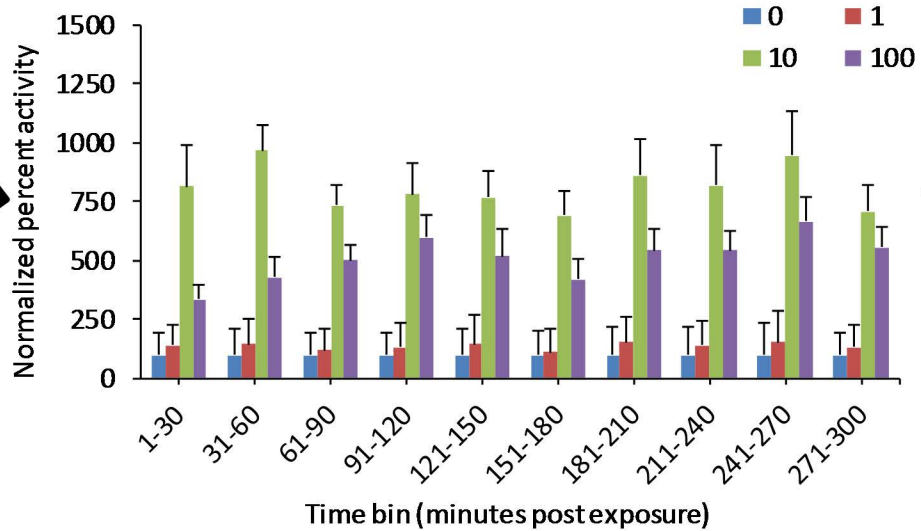

# CHEMICAL: Dehydroisoandrosterone 3-sulfate sodium

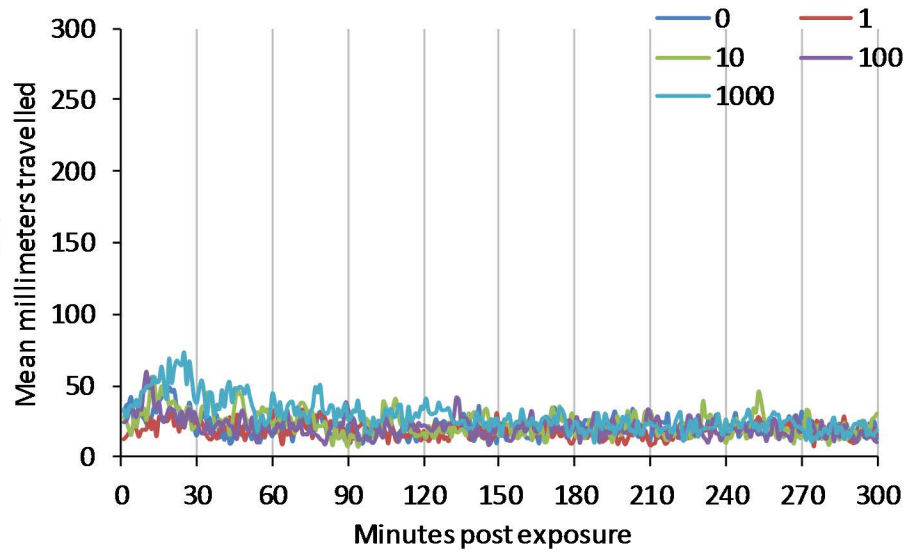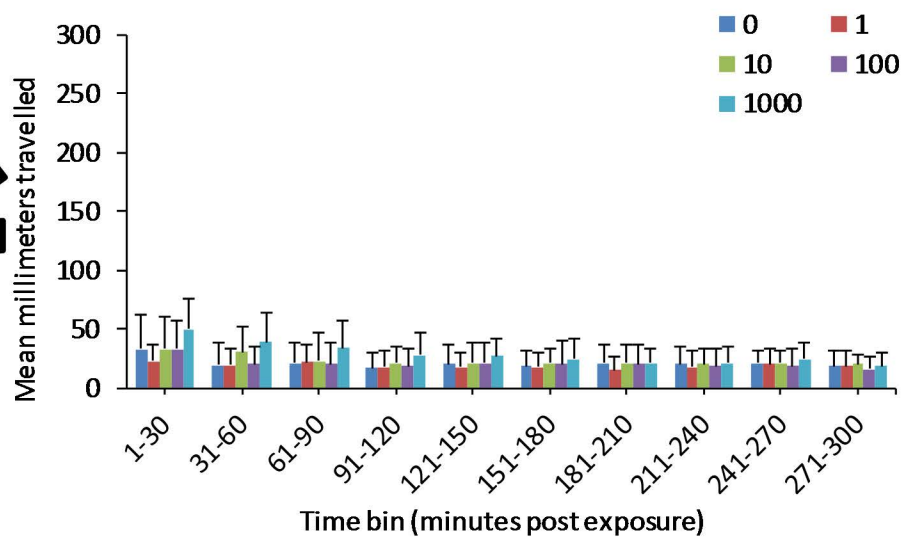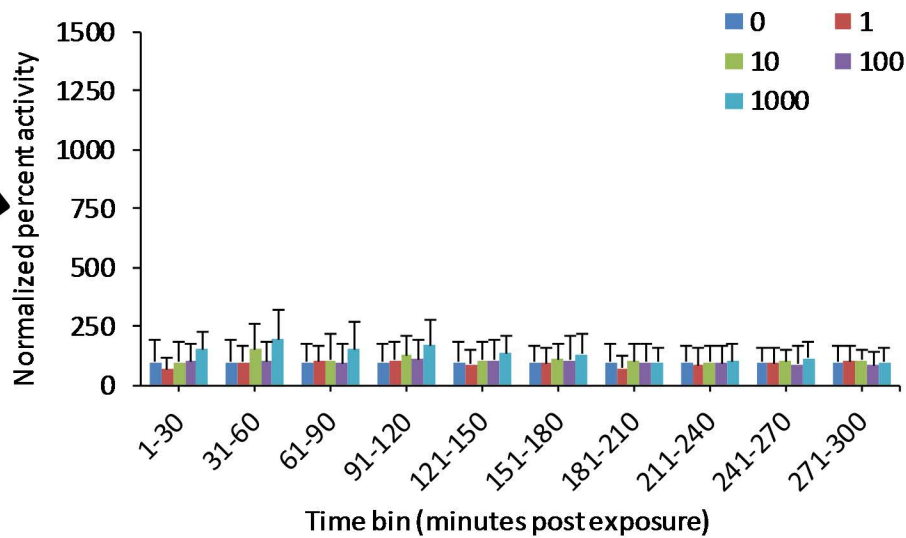

## Normalized percent activity

|                   | Time bin (minutes post exposure) |           |           |           |          |           |          |          |          |          |    |
|-------------------|----------------------------------|-----------|-----------|-----------|----------|-----------|----------|----------|----------|----------|----|
| [ $\mu\text{M}$ ] | 1-30                             | 31-60     | 61-90     | 91-120    | 121-150  | 151-180   | 181-210  | 211-240  | 241-270  | 271-300  | N  |
| 0                 | 100 ± 90                         | 100 ± 95  | 100 ± 79  | 100 ± 78  | 100 ± 85 | 100 ± 71  | 100 ± 73 | 100 ± 71 | 100 ± 56 | 100 ± 68 | 24 |
| 1                 | 69 ± 45                          | 97 ± 74   | 101 ± 69  | 106 ± 80  | 88 ± 59  | 94 ± 65   | 72 ± 55  | 87 ± 71  | 96 ± 62  | 101 ± 67 | 23 |
| 10                | 100 ± 85                         | 152 ± 107 | 107 ± 113 | 128 ± 79  | 106 ± 82 | 111 ± 63  | 102 ± 71 | 100 ± 68 | 101 ± 52 | 107 ± 48 | 21 |
| 100               | 101 ± 75                         | 104 ± 78  | 95 ± 82   | 110 ± 88  | 106 ± 86 | 107 ± 104 | 98 ± 78  | 93 ± 72  | 90 ± 74  | 88 ± 58  | 22 |
| 1000              | 153 ± 77                         | 197 ± 127 | 156 ± 112 | 169 ± 112 | 135 ± 77 | 130 ± 91  | 99 ± 58  | 103 ± 71 | 116 ± 67 | 99 ± 63  | 21 |

## Mean ± standard deviation

## Normalized percent activity

|                   | Time bin (minutes post exposure) |         |         |         |         |         |         |         |         |         |
|-------------------|----------------------------------|---------|---------|---------|---------|---------|---------|---------|---------|---------|
| [ $\mu\text{M}$ ] | 1-30                             | 31-60   | 61-90   | 91-120  | 121-150 | 151-180 | 181-210 | 211-240 | 241-270 | 271-300 |
| 0                 | 63-137                           | 61-139  | 68-132  | 68-132  | 65-135  | 71-129  | 70-130  | 71-129  | 77-123  | 72-128  |
| 1                 | 50-88                            | 66-128  | 72-130  | 73-140  | 63-113  | 67-121  | 49-95   | 57-117  | 70-122  | 73-130  |
| 10                | 63-137                           | 106-199 | 57-156  | 94-162  | 70-142  | 84-139  | 71-133  | 70-129  | 78-124  | 87-128  |
| 100               | 69-133                           | 70-137  | 60-130  | 72-147  | 70-143  | 63-151  | 65-132  | 62-124  | 58-121  | 63-112  |
| 1000              | 119-186                          | 141-252 | 107-204 | 120-218 | 102-168 | 91-170  | 74-125  | 72-134  | 87-145  | 72-127  |

## 95% confidence interval

## p-values

|                   | Time bin (minutes post exposure) |       |       |        |         |         |         |         |         |         |
|-------------------|----------------------------------|-------|-------|--------|---------|---------|---------|---------|---------|---------|
| [ $\mu\text{M}$ ] | 1-30                             | 31-60 | 61-90 | 91-120 | 121-150 | 151-180 | 181-210 | 211-240 | 241-270 | 271-300 |
| 1                 | 0.623                            | 0.998 | 0.999 | 1.000  | 1.000   | 1.000   | 0.617   | 0.991   | 0.994   | 1.000   |
| 10                | 1.000                            | 0.170 | 0.996 | 0.841  | 0.986   | 0.913   | 0.999   | 0.999   | 1.000   | 0.959   |
| 100               | 0.999                            | 1.000 | 0.999 | 1.000  | 0.997   | 1.000   | 0.999   | 0.992   | 0.871   | 0.984   |
| 1000              | 0.106                            | 0.002 | 0.241 | 0.216  | 0.332   | 0.930   | 0.999   | 1.000   | 0.996   | 1.000   |

Two-way repeated measures ANOVA, Tukey's post-hoc,  $p \leq 0.05$

# CHEMICAL: Pentylene tetrazole

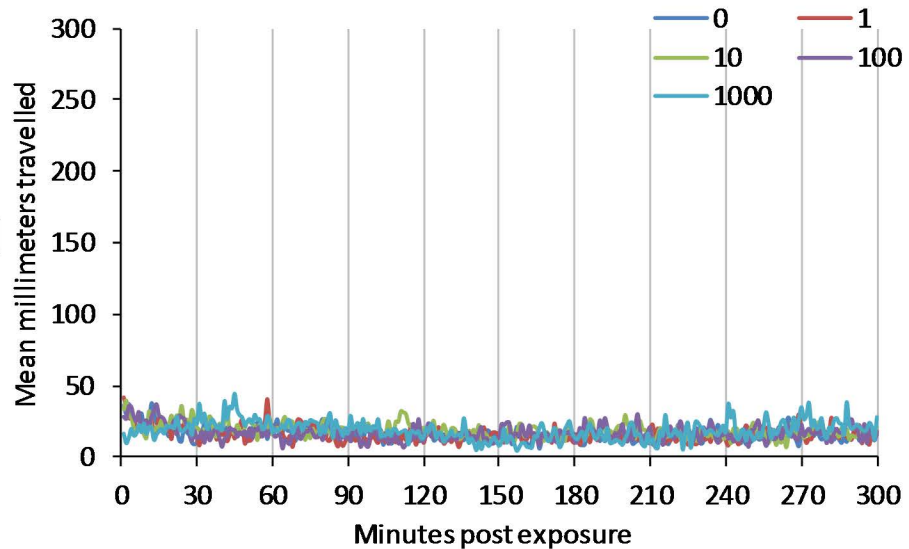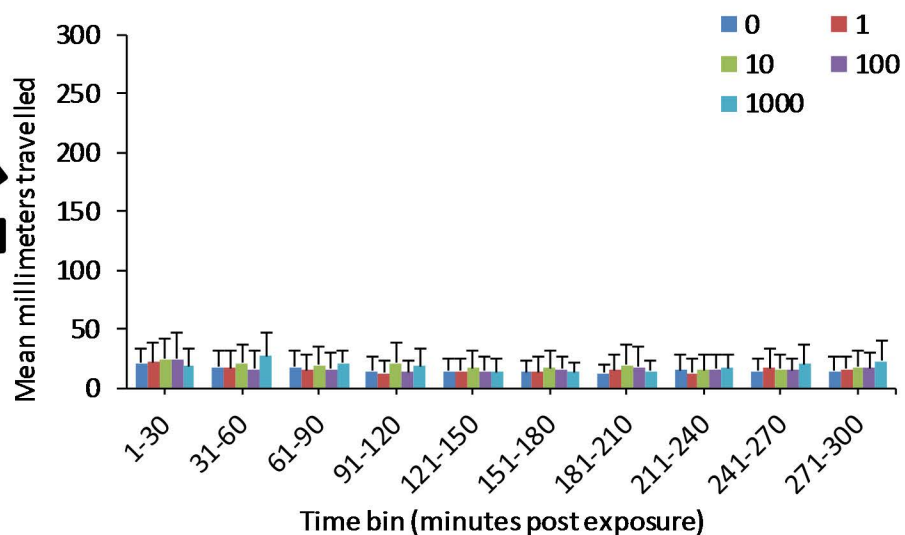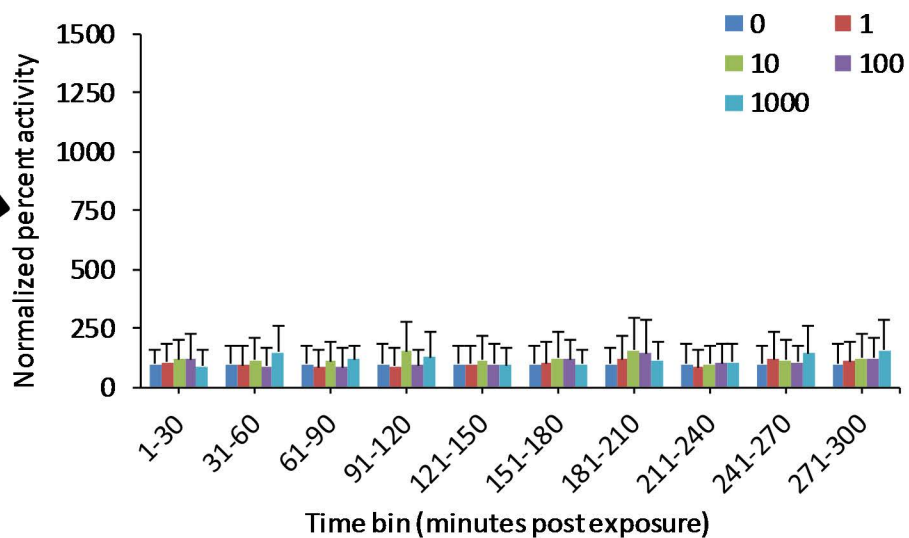

## Normalized percent activity

| [ $\mu\text{M}$ ] | Time bin (minutes post exposure) |           |          |           |           |           |           |          |           |           | N  |
|-------------------|----------------------------------|-----------|----------|-----------|-----------|-----------|-----------|----------|-----------|-----------|----|
|                   | 1-30                             | 31-60     | 61-90    | 91-120    | 121-150   | 151-180   | 181-210   | 211-240  | 241-270   | 271-300   |    |
| 0                 | 100 ± 59                         | 100 ± 74  | 100 ± 79 | 100 ± 84  | 100 ± 74  | 100 ± 73  | 100 ± 66  | 100 ± 82 | 100 ± 73  | 100 ± 82  | 24 |
| 1                 | 106 ± 81                         | 95 ± 79   | 86 ± 70  | 91 ± 79   | 100 ± 76  | 103 ± 90  | 119 ± 103 | 84 ± 75  | 120 ± 116 | 111 ± 79  | 24 |
| 10                | 118 ± 83                         | 116 ± 92  | 110 ± 85 | 152 ± 126 | 117 ± 105 | 124 ± 110 | 157 ± 135 | 99 ± 82  | 115 ± 88  | 124 ± 103 | 24 |
| 100               | 118 ± 108                        | 90 ± 82   | 87 ± 77  | 96 ± 68   | 98 ± 83   | 119 ± 79  | 144 ± 142 | 104 ± 78 | 109 ± 71  | 122 ± 89  | 23 |
| 1000              | 90 ± 70                          | 149 ± 112 | 118 ± 62 | 130 ± 106 | 94 ± 75   | 97 ± 61   | 115 ± 78  | 108 ± 81 | 144 ± 119 | 159 ± 130 | 24 |

## Mean ± standard deviation

## Normalized percent activity

| [ $\mu\text{M}$ ] | Time bin (minutes post exposure) |         |        |         |         |         |         |         |         |         |
|-------------------|----------------------------------|---------|--------|---------|---------|---------|---------|---------|---------|---------|
|                   | 1-30                             | 31-60   | 61-90  | 91-120  | 121-150 | 151-180 | 181-210 | 211-240 | 241-270 | 271-300 |
| 0                 | 76-124                           | 70-130  | 68-132 | 66-134  | 70-130  | 70-130  | 73-127  | 67-133  | 70-130  | 67-133  |
| 1                 | 72-139                           | 62-127  | 58-115 | 59-123  | 69-131  | 66-140  | 78-161  | 54-115  | 73-168  | 79-144  |
| 10                | 84-152                           | 78-153  | 75-145 | 100-203 | 74-159  | 79-169  | 102-212 | 66-132  | 80-151  | 82-166  |
| 100               | 73-163                           | 56-124  | 55-119 | 68-124  | 64-133  | 86-152  | 85-203  | 72-137  | 79-138  | 85-159  |
| 1000              | 61-119                           | 103-194 | 92-143 | 86-173  | 63-124  | 73-122  | 83-147  | 75-141  | 95-193  | 105-212 |

## 95% confidence interval

## p-values

| [ $\mu\text{M}$ ] | Time bin (minutes post exposure) |       |       |        |         |         |         |         |         |         |
|-------------------|----------------------------------|-------|-------|--------|---------|---------|---------|---------|---------|---------|
|                   | 1-30                             | 31-60 | 61-90 | 91-120 | 121-150 | 151-180 | 181-210 | 211-240 | 241-270 | 271-300 |
| 1                 | 1.000                            | 0.982 | 0.947 | 0.994  | 1.000   | 1.000   | 0.998   | 0.978   | 1.000   | 0.985   |
| 10                | 0.995                            | 0.997 | 0.998 | 0.464  | 1.000   | 0.961   | 0.632   | 1.000   | 0.997   | 0.955   |
| 100               | 1.000                            | 0.963 | 0.972 | 1.000  | 0.999   | 0.947   | 0.980   | 0.996   | 1.000   | 0.896   |
| 1000              | 0.878                            | 0.554 | 0.844 | 0.839  | 0.997   | 1.000   | 0.996   | 0.995   | 0.833   | 0.319   |

Two-way repeated measures ANOVA, Tukey's post-hoc,  $p \leq 0.05$



**CHEMICAL: Picrotoxin**

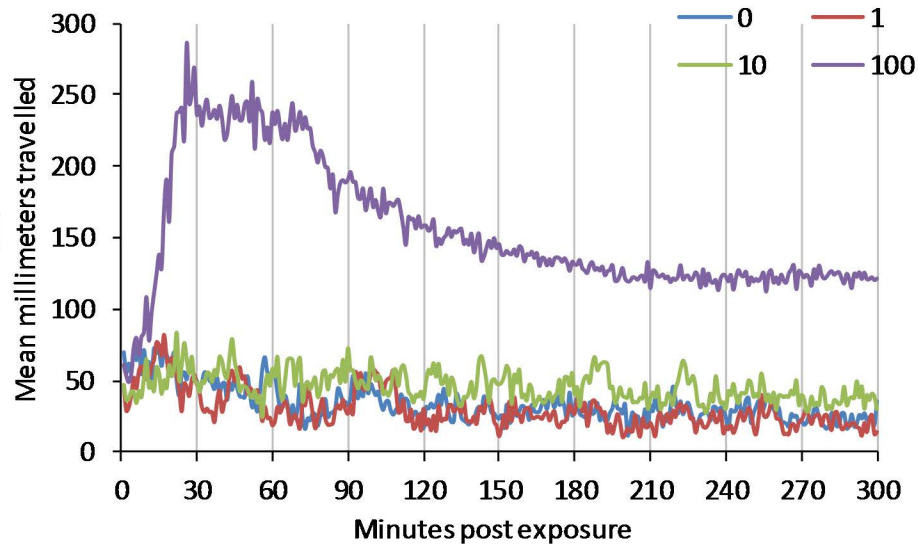

**Normalized percent activity**

|                   | Time bin (minutes post exposure) |           |           |           |           |           |          |          |           |           |    |
|-------------------|----------------------------------|-----------|-----------|-----------|-----------|-----------|----------|----------|-----------|-----------|----|
| [ $\mu\text{M}$ ] | 1-30                             | 31-60     | 61-90     | 91-120    | 121-150   | 151-180   | 181-210  | 211-240  | 241-270   | 271-300   | N  |
| 0                 | 100 ± 60                         | 100 ± 65  | 100 ± 54  | 100 ± 59  | 100 ± 71  | 100 ± 65  | 100 ± 68 | 100 ± 54 | 100 ± 70  | 100 ± 65  | 24 |
| 1                 | 87 ± 48                          | 81 ± 47   | 90 ± 56   | 111 ± 76  | 87 ± 62   | 84 ± 48   | 86 ± 46  | 81 ± 66  | 79 ± 59   | 91 ± 64   | 23 |
| 10                | 84 ± 50                          | 107 ± 64  | 169 ± 90  | 134 ± 79  | 162 ± 95  | 145 ± 80  | 171 ± 69 | 143 ± 64 | 144 ± 103 | 158 ± 91  | 22 |
| 100               | 248 ± 51                         | 504 ± 137 | 683 ± 204 | 478 ± 116 | 502 ± 126 | 449 ± 116 | 473 ± 97 | 429 ± 76 | 432 ± 86  | 536 ± 118 | 21 |

Mean ± standard deviation

‡ Exclusion: lethality observed in 1000  $\mu\text{M}$  treatment group (22 of 22 animals)

**Normalized percent activity**

|                   | Time bin (minutes post exposure) |         |         |         |         |         |         |         |         |         |
|-------------------|----------------------------------|---------|---------|---------|---------|---------|---------|---------|---------|---------|
| [ $\mu\text{M}$ ] | 1-30                             | 31-60   | 61-90   | 91-120  | 121-150 | 151-180 | 181-210 | 211-240 | 241-270 | 271-300 |
| 0                 | 76-124                           | 74-126  | 78-122  | 76-124  | 71-129  | 74-126  | 72-128  | 78-122  | 71-129  | 73-127  |
| 1                 | 67-107                           | 62-101  | 67-113  | 79-143  | 61-113  | 64-104  | 67-105  | 53-108  | 54-104  | 64-118  |
| 10                | 62-105                           | 80-135  | 130-207 | 100-167 | 121-202 | 110-179 | 142-201 | 116-171 | 100-188 | 120-197 |
| 100               | 225-270                          | 445-564 | 594-772 | 428-529 | 447-557 | 399-500 | 431-515 | 395-462 | 395-470 | 484-587 |

95% confidence interval

**p-values**

|                   | Time bin (minutes post exposure) |       |       |        |         |         |         |         |         |         |
|-------------------|----------------------------------|-------|-------|--------|---------|---------|---------|---------|---------|---------|
| [ $\mu\text{M}$ ] | 1-30                             | 31-60 | 61-90 | 91-120 | 121-150 | 151-180 | 181-210 | 211-240 | 241-270 | 271-300 |
| 1                 | 0.831                            | 0.699 | 0.935 | 0.992  | 0.902   | 0.830   | 0.902   | 0.265   | 0.276   | 0.897   |
| 10                | 0.661                            | 0.982 | 0.025 | 0.227  | 0.012   | 0.148   | 0.004   | 0.156   | 0.585   | 0.062   |
| 100               | 0.001                            | 0.001 | 0.001 | 0.001  | 0.001   | 0.001   | 0.001   | 0.001   | 0.001   | 0.001   |

Two-way repeated measures ANOVA, Tukey's post-hoc,  $p \leq 0.05$

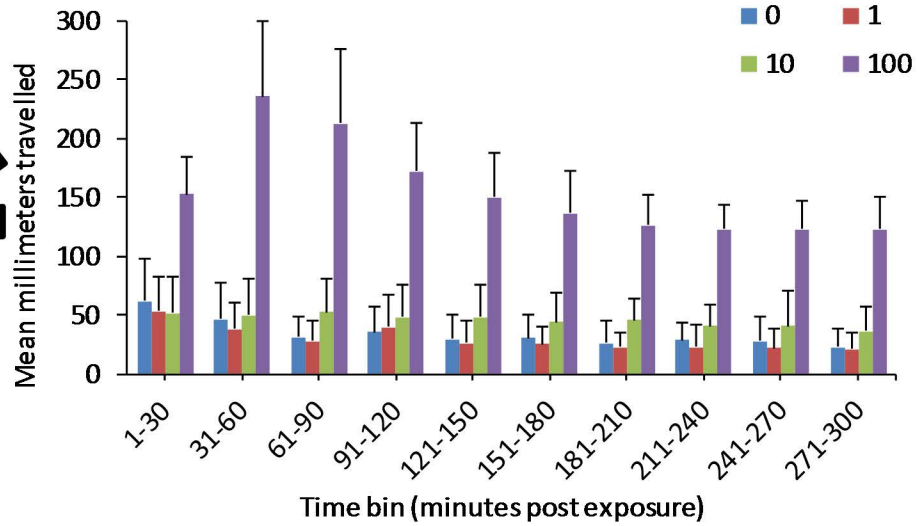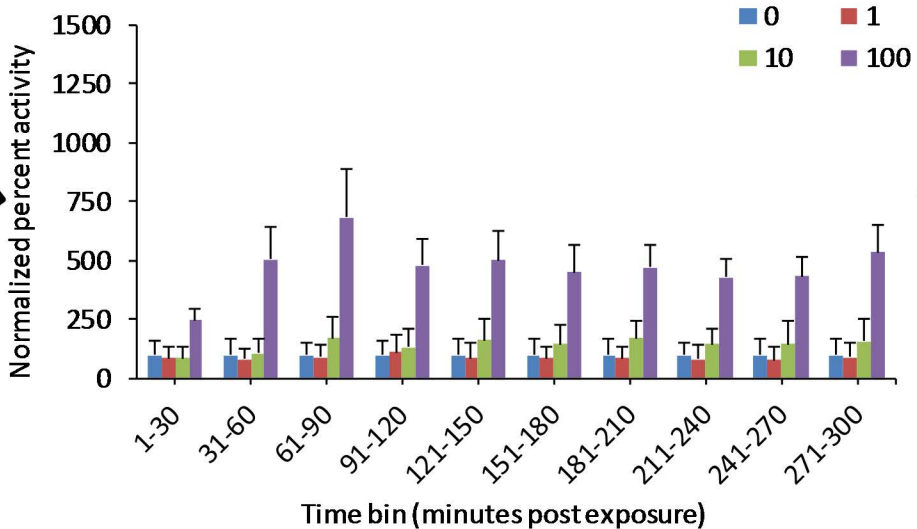

# CHEMICAL: Pregnenolone sulfate sodium

## Normalized percent activity

## Time bin (minutes post exposure)

| [ $\mu\text{M}$ ] | 1-30          | 31-60         | 61-90         | 91-120        | 121-150       | 151-180       | 181-210      | 211-240       | 241-270       | 271-300      | N  |
|-------------------|---------------|---------------|---------------|---------------|---------------|---------------|--------------|---------------|---------------|--------------|----|
| 0                 | 100 $\pm$ 81  | 100 $\pm$ 90  | 100 $\pm$ 66  | 100 $\pm$ 75  | 100 $\pm$ 74  | 100 $\pm$ 96  | 100 $\pm$ 76 | 100 $\pm$ 66  | 100 $\pm$ 74  | 100 $\pm$ 73 | 24 |
| 1                 | 81 $\pm$ 71   | 91 $\pm$ 88   | 112 $\pm$ 99  | 116 $\pm$ 91  | 105 $\pm$ 89  | 108 $\pm$ 77  | 100 $\pm$ 71 | 122 $\pm$ 80  | 109 $\pm$ 85  | 113 $\pm$ 73 | 20 |
| 10                | 95 $\pm$ 53   | 174 $\pm$ 146 | 138 $\pm$ 144 | 154 $\pm$ 100 | 150 $\pm$ 114 | 132 $\pm$ 88  | 134 $\pm$ 87 | 153 $\pm$ 100 | 151 $\pm$ 129 | 152 $\pm$ 98 | 24 |
| 100               | 134 $\pm$ 83  | 131 $\pm$ 98  | 147 $\pm$ 120 | 136 $\pm$ 116 | 118 $\pm$ 95  | 138 $\pm$ 106 | 140 $\pm$ 80 | 163 $\pm$ 98  | 158 $\pm$ 94  | 133 $\pm$ 78 | 22 |
| 1000              | 161 $\pm$ 106 | 225 $\pm$ 222 | 207 $\pm$ 213 | 167 $\pm$ 225 | 120 $\pm$ 128 | 117 $\pm$ 99  | 99 $\pm$ 92  | 131 $\pm$ 109 | 133 $\pm$ 100 | 131 $\pm$ 97 | 24 |

## Mean $\pm$ standard deviation

## Normalized percent activity

## Time bin (minutes post exposure)

| [ $\mu\text{M}$ ] | 1-30    | 31-60   | 61-90   | 91-120  | 121-150 | 151-180 | 181-210 | 211-240 | 241-270 | 271-300 |
|-------------------|---------|---------|---------|---------|---------|---------|---------|---------|---------|---------|
| 0                 | 67-133  | 63-137  | 73-127  | 69-131  | 70-130  | 61-139  | 69-131  | 73-127  | 70-130  | 70-130  |
| 1                 | 50-113  | 52-130  | 68-157  | 75-157  | 65-144  | 74-143  | 68-131  | 86-158  | 71-147  | 80-146  |
| 10                | 74-117  | 114-233 | 129-247 | 113-195 | 104-197 | 96-168  | 99-170  | 113-194 | 98-203  | 112-192 |
| 100               | 99-170  | 90-173  | 95-198  | 86-186  | 78-159  | 92-183  | 106-174 | 122-205 | 118-198 | 100-167 |
| 1000              | 118-204 | 135-315 | 120-294 | 76-259  | 67-172  | 76-158  | 62-137  | 87-176  | 92-174  | 91-170  |

## 95% confidence interval

## p-values

## Time bin (minutes post exposure)

| [ $\mu\text{M}$ ] | 1-30  | 31-60 | 61-90 | 91-120 | 121-150 | 151-180 | 181-210 | 211-240 | 241-270 | 271-300 |
|-------------------|-------|-------|-------|--------|---------|---------|---------|---------|---------|---------|
| 1                 | 0.686 | 0.979 | 1.000 | 0.996  | 1.000   | 0.965   | 1.000   | 0.981   | 1.000   | 0.973   |
| 10                | 0.996 | 0.206 | 0.147 | 0.386  | 0.628   | 0.576   | 0.823   | 0.666   | 0.579   | 0.370   |
| 100               | 0.381 | 0.720 | 0.779 | 0.879  | 0.974   | 0.645   | 0.554   | 0.358   | 0.353   | 0.634   |
| 1000              | 0.079 | 0.013 | 0.337 | 0.915  | 1.000   | 0.989   | 0.978   | 0.997   | 0.936   | 0.875   |

Two-way repeated measures ANOVA, Tukey's post-hoc,  $p \leq 0.05$

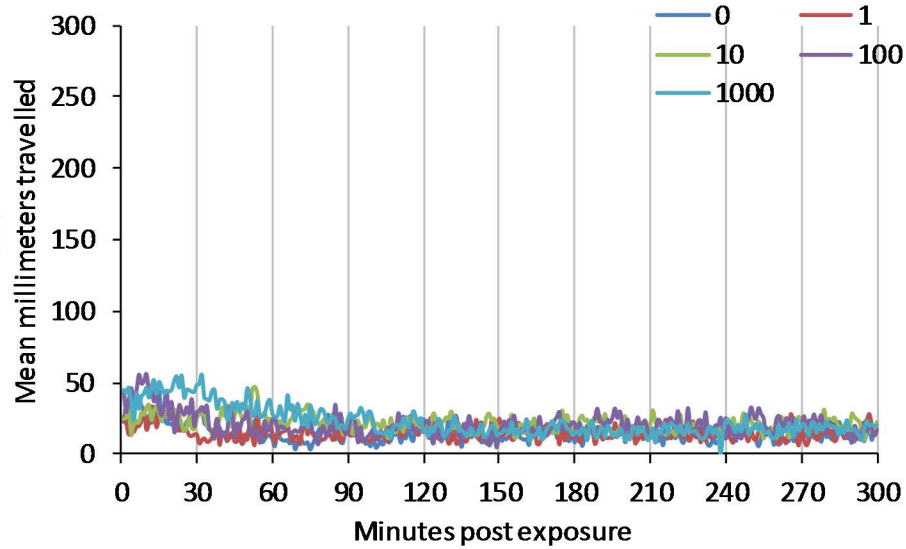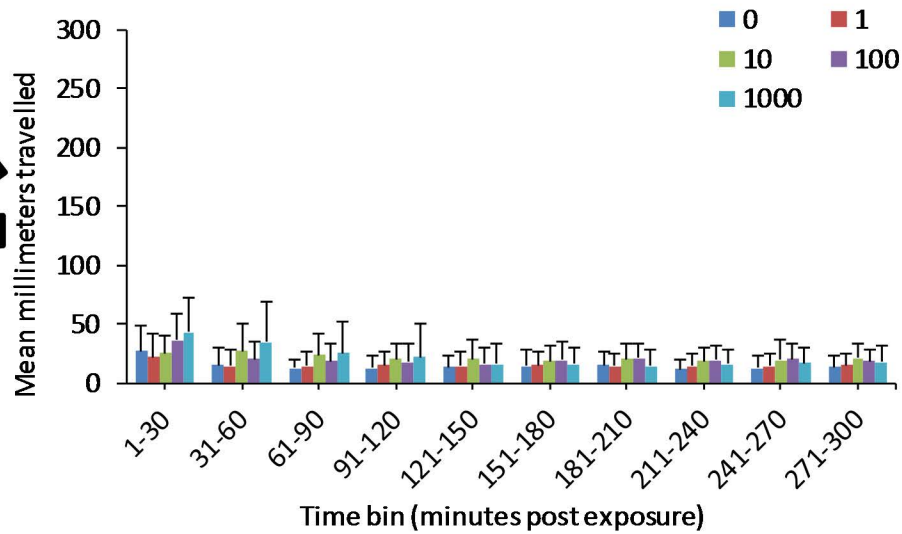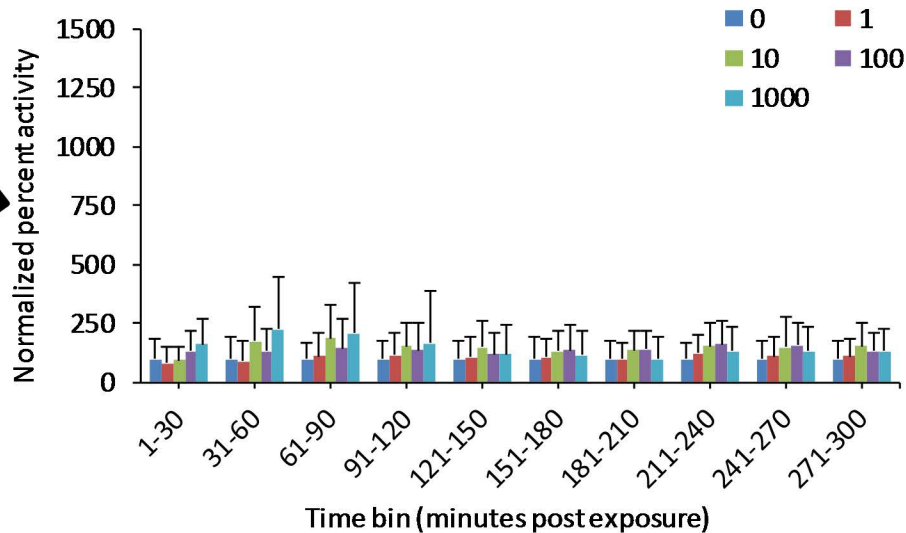

# CHEMICAL: SCH 50911

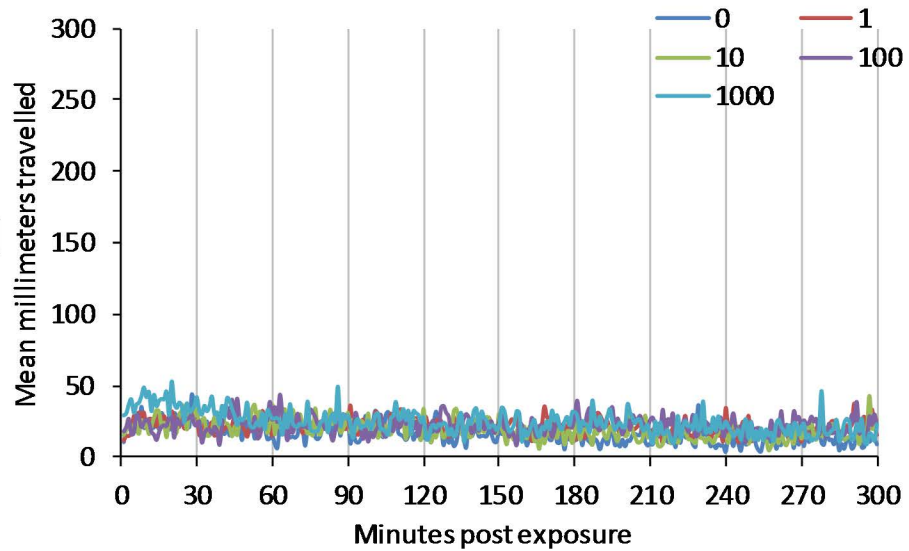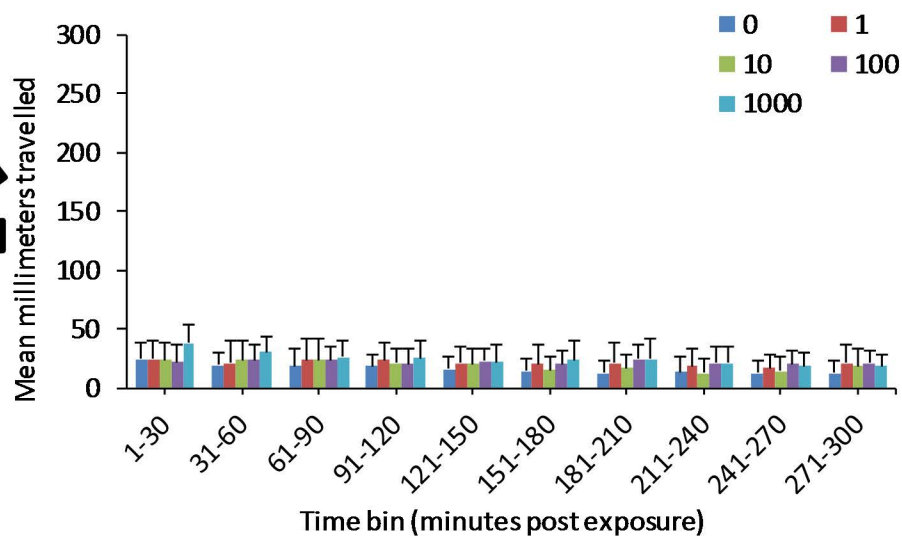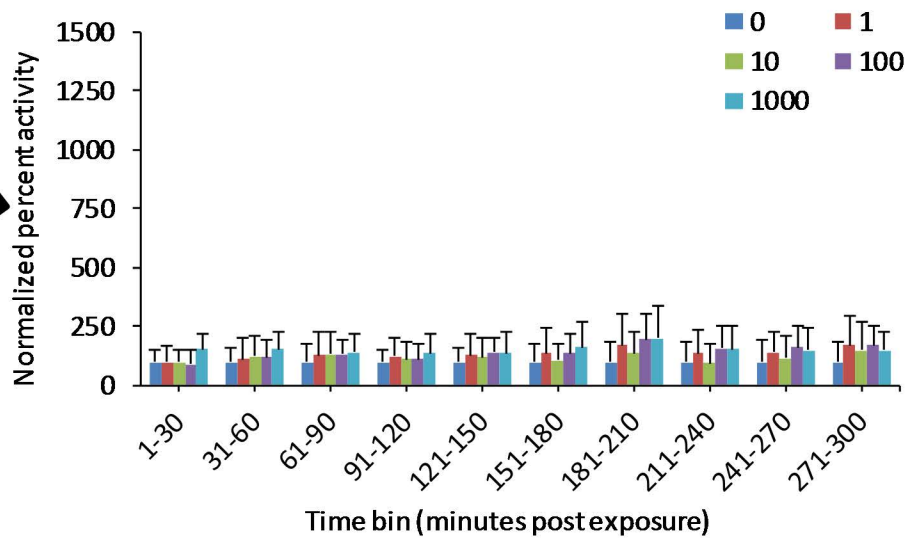

## Normalized percent activity

| [μM] | Time bin (minutes post exposure) |          |           |          |          |           |           |           |          |           | N  |
|------|----------------------------------|----------|-----------|----------|----------|-----------|-----------|-----------|----------|-----------|----|
|      | 1-30                             | 31-60    | 61-90     | 91-120   | 121-150  | 151-180   | 181-210   | 211-240   | 241-270  | 271-300   |    |
| 0    | 100 ± 54                         | 100 ± 58 | 100 ± 78  | 100 ± 52 | 100 ± 64 | 100 ± 75  | 100 ± 82  | 100 ± 87  | 100 ± 93 | 100 ± 82  | 16 |
| 1    | 100 ± 65                         | 110 ± 93 | 129 ± 102 | 125 ± 78 | 130 ± 85 | 138 ± 110 | 172 ± 134 | 135 ± 102 | 139 ± 91 | 172 ± 127 | 16 |
| 10   | 97 ± 58                          | 124 ± 87 | 131 ± 93  | 112 ± 71 | 122 ± 77 | 107 ± 74  | 138 ± 90  | 95 ± 81   | 117 ± 94 | 149 ± 117 | 16 |
| 100  | 90 ± 59                          | 120 ± 70 | 131 ± 62  | 111 ± 65 | 139 ± 67 | 138 ± 78  | 198 ± 102 | 156 ± 95  | 164 ± 85 | 169 ± 85  | 14 |
| 1000 | 154 ± 66                         | 155 ± 68 | 141 ± 80  | 136 ± 84 | 135 ± 88 | 163 ± 105 | 198 ± 139 | 151 ± 100 | 149 ± 97 | 150 ± 78  | 14 |

## Mean ± standard deviation

## Normalized percent activity

| [μM] | Time bin (minutes post exposure) |         |        |        |         |         |         |         |         |         |
|------|----------------------------------|---------|--------|--------|---------|---------|---------|---------|---------|---------|
|      | 1-30                             | 31-60   | 61-90  | 91-120 | 121-150 | 151-180 | 181-210 | 211-240 | 241-270 | 271-300 |
| 0    | 73-127                           | 71-129  | 61-139 | 74-126 | 68-132  | 62-138  | 59-141  | 56-144  | 54-146  | 59-141  |
| 1    | 68-133                           | 64-157  | 78-180 | 86-164 | 87-173  | 83-193  | 104-239 | 84-186  | 93-184  | 109-235 |
| 10   | 68-126                           | 81-168  | 84-177 | 77-148 | 83-160  | 70-143  | 93-182  | 55-135  | 70-164  | 90-208  |
| 100  | 58-121                           | 83-157  | 97-164 | 76-146 | 103-175 | 96-179  | 143-252 | 105-207 | 118-209 | 123-214 |
| 1000 | 119-189                          | 119-192 | 99-184 | 92-181 | 88-182  | 107-219 | 124-272 | 98-205  | 97-200  | 108-191 |

## 95% confidence interval

## p-values

| [μM] | Time bin (minutes post exposure) |       |       |        |         |         |         |         |         |         |
|------|----------------------------------|-------|-------|--------|---------|---------|---------|---------|---------|---------|
|      | 1-30                             | 31-60 | 61-90 | 91-120 | 121-150 | 151-180 | 181-210 | 211-240 | 241-270 | 271-300 |
| 1    | 1.000                            | 1.000 | 0.893 | 0.955  | 0.855   | 0.879   | 0.444   | 0.873   | 0.693   | 0.361   |
| 10   | 0.998                            | 0.978 | 0.811 | 0.999  | 0.950   | 0.998   | 0.806   | 1.000   | 0.983   | 0.721   |
| 100  | 0.961                            | 0.954 | 0.629 | 0.996  | 0.614   | 0.660   | 0.095   | 0.452   | 0.311   | 0.306   |
| 1000 | 0.209                            | 0.289 | 0.449 | 0.796  | 0.789   | 0.294   | 0.098   | 0.487   | 0.522   | 0.562   |

Two-way repeated measures ANOVA, Tukey's post-hoc,  $p \leq 0.05$

# Flavonoids and flavonoid-like compounds

## 24 tested chemicals:

3'-Hydroxyflavone  
6-Hydroxyflavone  
7-Hydroxyflavone  
 $\alpha$ -Naphthoflavone  
 $\beta$ -Naphthoflavone  
Apigenin  
Biochanin A  
Chrysin  
Daidzein  
(S)-Equol  
Fisetin  
Flavone  
Formononetin  
Galangin  
Genistein  
Kaempferol  
Luteolin  
Morin  
Myricetin  
Naringenin  
Puerarin  
Quercetin  
Quercetin 3- $\beta$ -D glucoside  
Resveratrol

# CHEMICAL: 3'-Hydroxyflavone

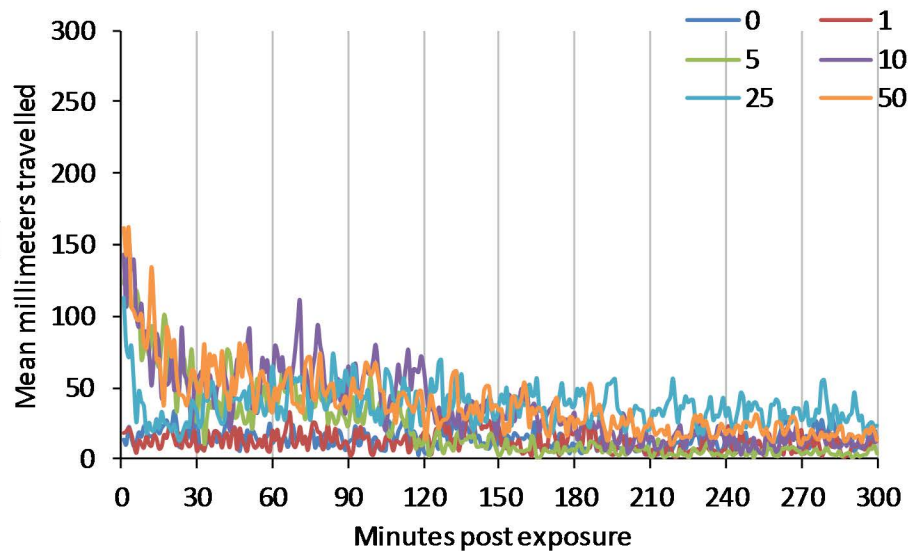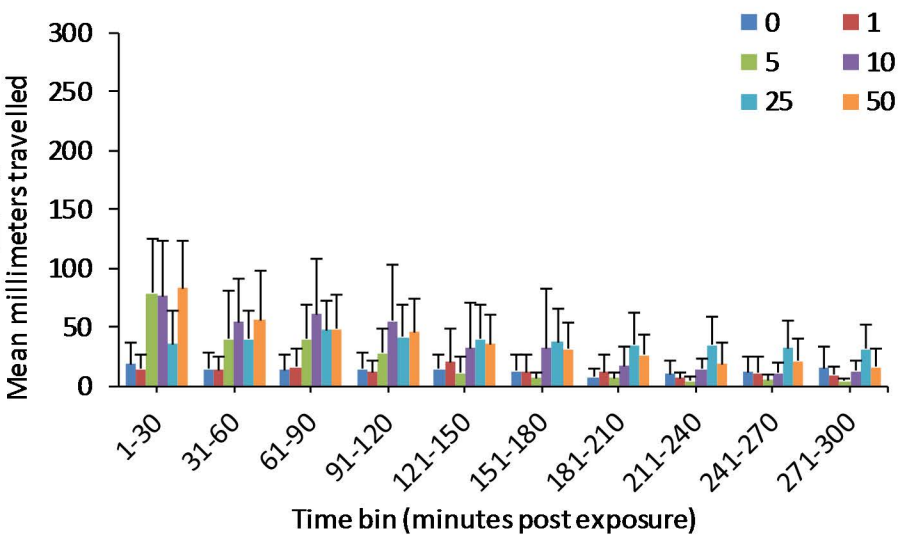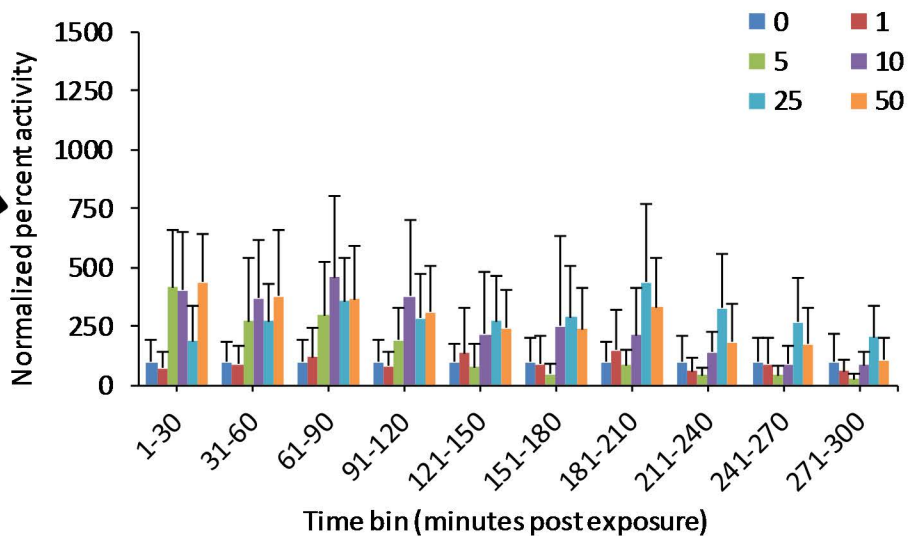

## Normalized percent activity

| [μM] | Time bin (minutes post exposure) |           |           |           |           |           |           |           |           |           | N  |
|------|----------------------------------|-----------|-----------|-----------|-----------|-----------|-----------|-----------|-----------|-----------|----|
|      | 1-30                             | 31-60     | 61-90     | 91-120    | 121-150   | 151-180   | 181-210   | 211-240   | 241-270   | 271-300   |    |
| 0    | 100 ± 90                         | 100 ± 87  | 100 ± 96  | 100 ± 90  | 100 ± 79  | 100 ± 101 | 100 ± 85  | 100 ± 111 | 100 ± 100 | 100 ± 116 | 16 |
| 1    | 74 ± 68                          | 89 ± 77   | 19 ± 23   | 82 ± 63   | 137 ± 189 | 89 ± 123  | 147 ± 174 | 62 ± 55   | 90 ± 114  | 60 ± 51   | 16 |
| 5    | 414 ± 248                        | 271 ± 271 | 299 ± 226 | 193 ± 138 | 77 ± 96   | 50 ± 43   | 86 ± 65   | 42 ± 33   | 44 ± 37   | 28 ± 18   | 16 |
| 10   | 404 ± 248                        | 368 ± 250 | 459 ± 348 | 376 ± 329 | 215 ± 264 | 252 ± 382 | 213 ± 200 | 139 ± 85  | 90 ± 78   | 85 ± 61   | 16 |
| 25   | 186 ± 153                        | 271 ± 162 | 358 ± 184 | 285 ± 185 | 270 ± 192 | 291 ± 213 | 437 ± 331 | 328 ± 231 | 267 ± 194 | 203 ± 135 | 16 |
| 50   | 436 ± 210                        | 377 ± 285 | 364 ± 225 | 311 ± 194 | 242 ± 164 | 240 ± 171 | 330 ± 209 | 182 ± 162 | 174 ± 156 | 106 ± 99  | 16 |

Mean ± standard deviation

## Normalized percent activity

| [μM] | Time bin (minutes post exposure) |         |         |         |         |         |         |         |         |         |
|------|----------------------------------|---------|---------|---------|---------|---------|---------|---------|---------|---------|
|      | 1-30                             | 31-60   | 61-90   | 91-120  | 121-150 | 151-180 | 181-210 | 211-240 | 241-270 | 271-300 |
| 0    | 55-145                           | 57-143  | 52-148  | 55-145  | 61-139  | 50-150  | 57-143  | 45-155  | 50-150  | 42-158  |
| 1    | 40-108                           | 51-128  | 58-181  | 50-113  | 43-231  | 27-150  | 60-235  | 34-89   | 33-147  | 35-86   |
| 5    | 291-538                          | 135-407 | 186-412 | 124-262 | 29-125  | 28-71   | 54-119  | 26-59   | 25-62   | 19-37   |
| 10   | 279-528                          | 244-493 | 285-634 | 212-541 | 83-347  | 61-443  | 113-313 | 96-182  | 51-128  | 55-116  |
| 25   | 109-262                          | 190-352 | 266-450 | 192-377 | 174-366 | 185-397 | 271-602 | 212-444 | 170-364 | 135-271 |
| 50   | 332-541                          | 234-519 | 252-476 | 214-408 | 161-324 | 154-325 | 225-434 | 101-263 | 96-252  | 57-166  |

95% confidence interval

## p-values

| [μM] | Time bin (minutes post exposure) |       |       |        |         |         |         |         |         |         |
|------|----------------------------------|-------|-------|--------|---------|---------|---------|---------|---------|---------|
|      | 1-30                             | 31-60 | 61-90 | 91-120 | 121-150 | 151-180 | 181-210 | 211-240 | 241-270 | 271-300 |
| 1    | 0.959                            | 1.000 | 0.999 | 1.000  | 1.000   | 0.995   | 0.939   | 0.995   | 0.998   | 0.975   |
| 5    | 0.001                            | 0.035 | 0.002 | 0.217  | 0.739   | 0.814   | 1.000   | 0.801   | 0.425   | 0.167   |
| 10   | 0.001                            | 0.001 | 0.001 | 0.001  | 0.420   | 0.050   | 0.169   | 0.231   | 1.000   | 0.998   |
| 25   | 0.122                            | 0.001 | 0.001 | 0.002  | 0.008   | 0.001   | 0.001   | 0.001   | 0.004   | 0.015   |
| 50   | 0.001                            | 0.001 | 0.001 | 0.001  | 0.037   | 0.008   | 0.001   | 0.172   | 0.558   | 0.988   |

Two-way repeated measures ANOVA, Tukey's post-hoc,  $p \leq 0.05$

# CHEMICAL: 6-Hydroxyflavone

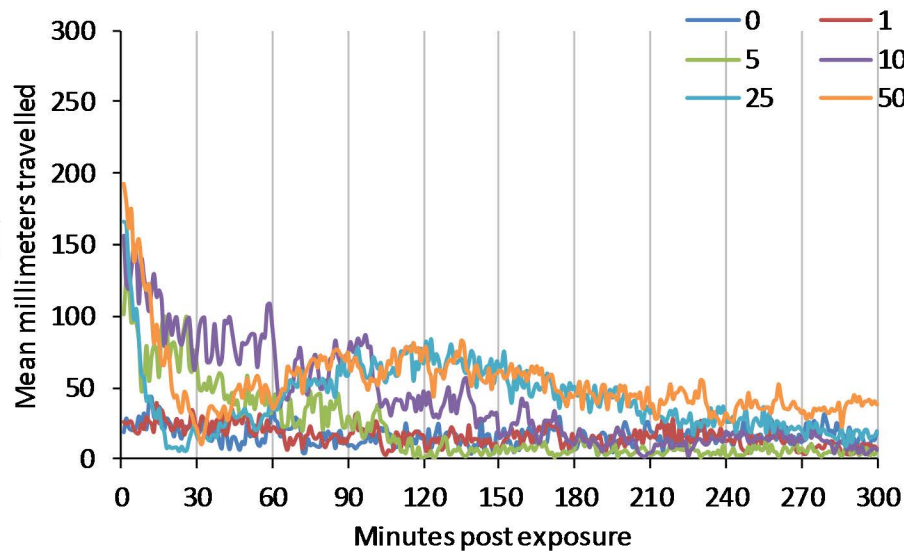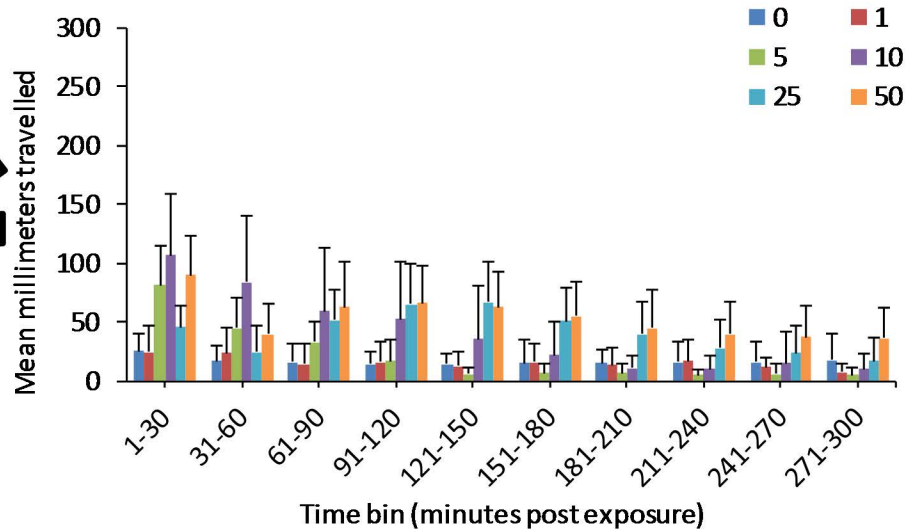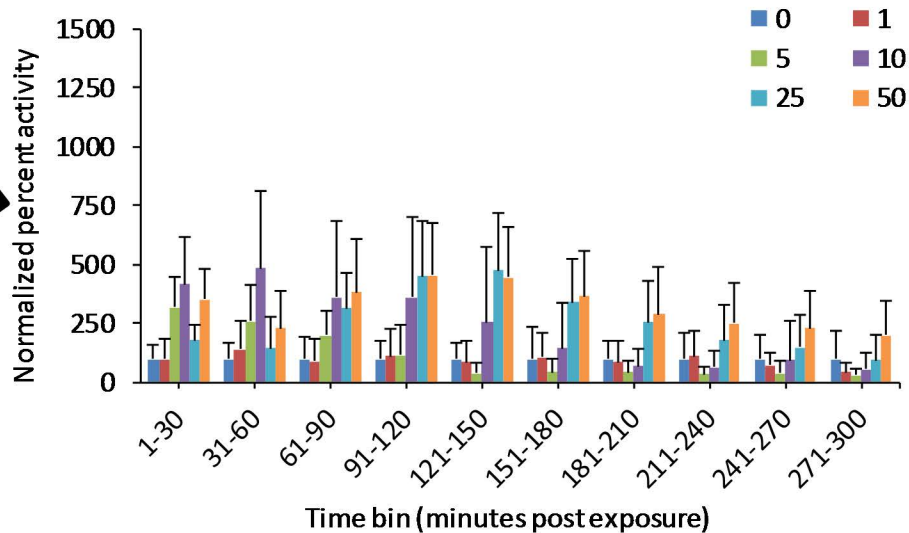

## Normalized percent activity

| [μM] | Time bin (minutes post exposure) |           |           |           |           |           |           |           |           |           | N  |
|------|----------------------------------|-----------|-----------|-----------|-----------|-----------|-----------|-----------|-----------|-----------|----|
|      | 1-30                             | 31-60     | 61-90     | 91-120    | 121-150   | 151-180   | 181-210   | 211-240   | 241-270   | 271-300   |    |
| 0    | 100 ± 60                         | 100 ± 72  | 100 ± 89  | 100 ± 75  | 100 ± 71  | 100 ± 138 | 100 ± 75  | 100 ± 112 | 100 ± 103 | 100 ± 120 | 16 |
| 1    | 97 ± 87                          | 140 ± 118 | 89 ± 100  | 110 ± 115 | 87 ± 89   | 107 ± 107 | 85 ± 95   | 110 ± 113 | 73 ± 53   | 42 ± 40   | 16 |
| 5    | 316 ± 130                        | 261 ± 154 | 201 ± 103 | 117 ± 126 | 40 ± 41   | 45 ± 55   | 45 ± 51   | 35 ± 30   | 39 ± 50   | 30 ± 30   | 16 |
| 10   | 418 ± 203                        | 485 ± 325 | 362 ± 323 | 361 ± 338 | 254 ± 322 | 147 ± 191 | 69 ± 71   | 66 ± 70   | 95 ± 168  | 55 ± 75   | 16 |
| 25   | 178 ± 70                         | 143 ± 132 | 313 ± 152 | 450 ± 231 | 474 ± 247 | 338 ± 185 | 256 ± 172 | 178 ± 150 | 149 ± 138 | 96 ± 106  | 16 |
| 50   | 351 ± 127                        | 230 ± 155 | 382 ± 231 | 454 ± 222 | 445 ± 211 | 365 ± 193 | 288 ± 205 | 252 ± 174 | 230 ± 162 | 201 ± 144 | 16 |

## Mean ± standard deviation

## Normalized percent activity

| [μM] | Time bin (minutes post exposure) |         |         |         |         |         |         |         |         |         |
|------|----------------------------------|---------|---------|---------|---------|---------|---------|---------|---------|---------|
|      | 1-30                             | 31-60   | 61-90   | 91-120  | 121-150 | 151-180 | 181-210 | 211-240 | 241-270 | 271-300 |
| 0    | 70-130                           | 64-136  | 55-145  | 62-138  | 65-135  | 31-169  | 63-137  | 44-156  | 49-151  | 40-160  |
| 1    | 53-140                           | 81-199  | 39-138  | 53-167  | 43-132  | 53-160  | 38-133  | 53-166  | 46-99   | 22-61   |
| 5    | 251-382                          | 184-337 | 149-253 | 54-180  | 19-60   | 17-73   | 19-70   | 19-50   | 14-64   | 15-45   |
| 10   | 316-519                          | 322-648 | 200-524 | 192-530 | 93-414  | 51-242  | 34-105  | 31-101  | 11-179  | 18-92   |
| 25   | 143-212                          | 77-209  | 237-389 | 334-565 | 351-598 | 245-431 | 170-342 | 103-253 | 80-218  | 42-149  |
| 50   | 288-415                          | 152-307 | 266-497 | 343-565 | 339-550 | 269-461 | 185-390 | 165-339 | 149-311 | 129-273 |

## 95% confidence interval

## p-values

| [μM] | Time bin (minutes post exposure) |       |       |        |         |         |         |         |         |         |
|------|----------------------------------|-------|-------|--------|---------|---------|---------|---------|---------|---------|
|      | 1-30                             | 31-60 | 61-90 | 91-120 | 121-150 | 151-180 | 181-210 | 211-240 | 241-270 | 271-300 |
| 1    | 0.926                            | 0.995 | 0.963 | 0.981  | 0.954   | 1.000   | 0.908   | 1.000   | 0.991   | 0.206   |
| 5    | 0.001                            | 0.006 | 0.035 | 1.000  | 0.138   | 0.276   | 0.096   | 0.206   | 0.098   | 0.038   |
| 10   | 0.001                            | 0.001 | 0.001 | 0.003  | 0.471   | 1.000   | 0.549   | 0.840   | 0.959   | 0.457   |
| 25   | 0.164                            | 0.967 | 0.001 | 0.001  | 0.001   | 0.001   | 0.034   | 0.330   | 0.768   | 1.000   |
| 50   | 0.001                            | 0.030 | 0.001 | 0.001  | 0.001   | 0.001   | 0.009   | 0.003   | 0.024   | 0.056   |

Two-way repeated measures ANOVA, Tukey's post-hoc,  $p \leq 0.05$

# CHEMICAL: 7-Hydroxyflavone

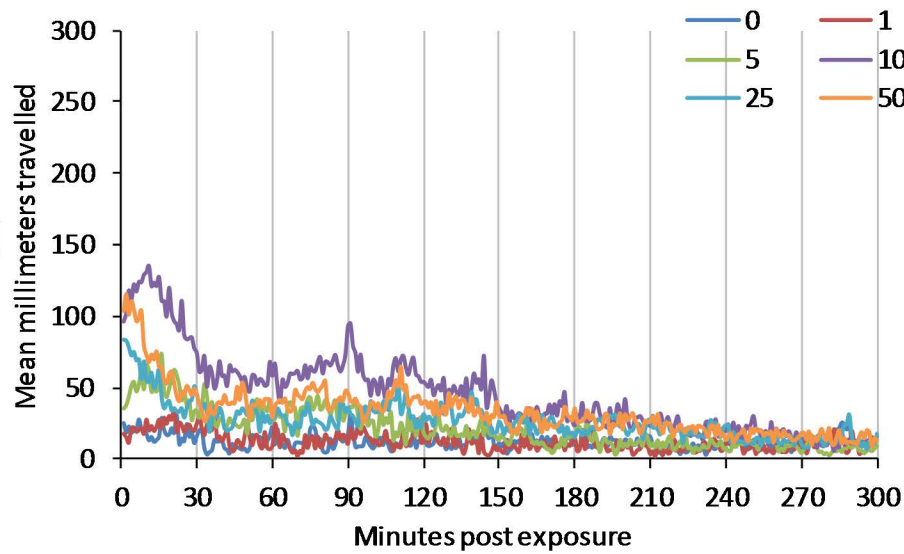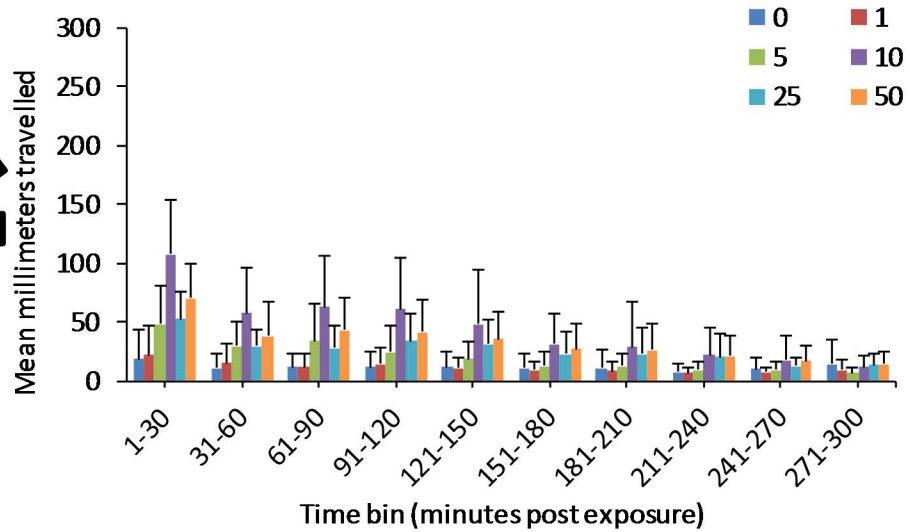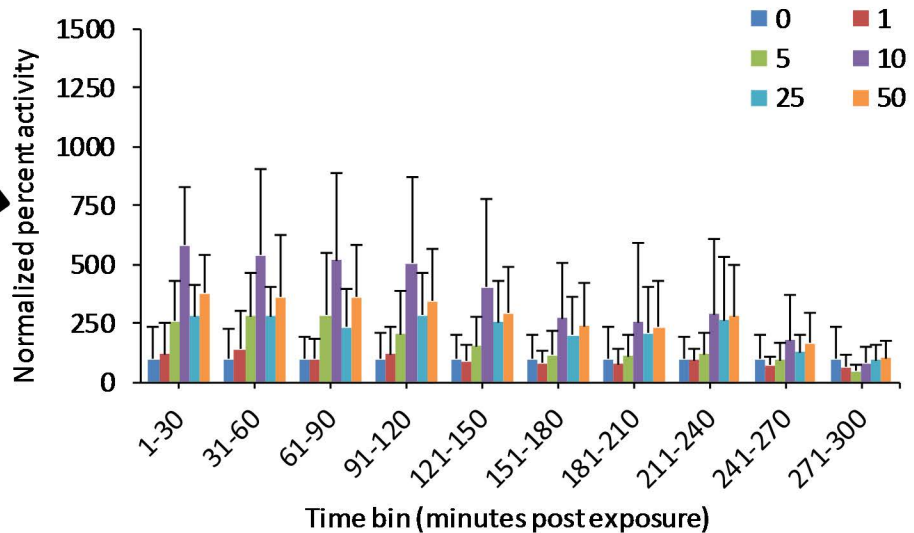

## Normalized percent activity

|                   | Time bin (minutes post exposure) |           |           |           |           |           |           |           |           |           |    |
|-------------------|----------------------------------|-----------|-----------|-----------|-----------|-----------|-----------|-----------|-----------|-----------|----|
| [ $\mu\text{M}$ ] | 1-30                             | 31-60     | 61-90     | 91-120    | 121-150   | 151-180   | 181-210   | 211-240   | 241-270   | 271-300   | N  |
| 0                 | 100 ± 135                        | 100 ± 124 | 100 ± 96  | 100 ± 112 | 100 ± 106 | 100 ± 106 | 100 ± 133 | 100 ± 90  | 100 ± 104 | 100 ± 139 | 16 |
| 1                 | 19 ± 133                         | 140 ± 160 | 96 ± 91   | 120 ± 120 | 90 ± 70   | 83 ± 55   | 77 ± 66   | 93 ± 49   | 73 ± 37   | 66 ± 54   | 16 |
| 5                 | 261 ± 172                        | 280 ± 188 | 284 ± 265 | 205 ± 187 | 155 ± 124 | 115 ± 107 | 111 ± 91  | 121 ± 89  | 93 ± 79   | 46 ± 33   | 16 |
| 10                | 580 ± 253                        | 539 ± 365 | 519 ± 367 | 504 ± 366 | 402 ± 378 | 273 ± 234 | 255 ± 336 | 287 ± 319 | 179 ± 195 | 80 ± 72   | 16 |
| 25                | 281 ± 129                        | 280 ± 125 | 233 ± 161 | 283 ± 186 | 257 ± 175 | 200 ± 164 | 207 ± 199 | 263 ± 273 | 129 ± 75  | 93 ± 69   | 16 |
| 50                | 377 ± 164                        | 359 ± 268 | 360 ± 225 | 343 ± 226 | 293 ± 194 | 238 ± 187 | 232 ± 198 | 282 ± 218 | 168 ± 126 | 101 ± 72  | 16 |

## Mean ± standard deviation

## Normalized percent activity

|                   | Time bin (minutes post exposure) |         |         |         |         |         |         |         |         |         |
|-------------------|----------------------------------|---------|---------|---------|---------|---------|---------|---------|---------|---------|
| [ $\mu\text{M}$ ] | 1-30                             | 31-60   | 61-90   | 91-120  | 121-150 | 151-180 | 181-210 | 211-240 | 241-270 | 271-300 |
| 0                 | 33-167                           | 38-162  | 52-148  | 44-156  | 47-153  | 47-153  | 33-167  | 55-145  | 48-152  | 30-170  |
| 1                 | 52-185                           | 60-220  | 51-142  | 60-180  | 55-125  | 55-110  | 44-110  | 69-118  | 54-91   | 39-93   |
| 5                 | 175-347                          | 186-374 | 151-416 | 112-299 | 93-217  | 61-168  | 65-157  | 76-166  | 54-133  | 30-63   |
| 10                | 453-706                          | 356-722 | 335-702 | 321-687 | 213-591 | 156-390 | 87-424  | 128-447 | 81-276  | 45-116  |
| 25                | 217-346                          | 218-343 | 152-313 | 190-376 | 169-345 | 118-282 | 107-306 | 127-399 | 92-167  | 59-127  |
| 50                | 295-459                          | 225-493 | 248-473 | 230-456 | 196-390 | 144-332 | 133-331 | 173-390 | 105-231 | 64-137  |

## 95% confidence interval

## p-values

|                   | Time bin (minutes post exposure) |       |       |        |         |         |         |         |         |         |
|-------------------|----------------------------------|-------|-------|--------|---------|---------|---------|---------|---------|---------|
| [ $\mu\text{M}$ ] | 1-30                             | 31-60 | 61-90 | 91-120 | 121-150 | 151-180 | 181-210 | 211-240 | 241-270 | 271-300 |
| 1                 | 0.999                            | 0.931 | 0.999 | 0.982  | 0.998   | 1.000   | 1.000   | 0.999   | 1.000   | 1.000   |
| 5                 | 0.001                            | 0.001 | 0.001 | 0.044  | 0.384   | 1.000   | 0.996   | 0.996   | 0.999   | 0.816   |
| 10                | 0.001                            | 0.001 | 0.001 | 0.001  | 0.001   | 0.012   | 0.038   | 0.064   | 0.610   | 1.000   |
| 25                | 0.001                            | 0.001 | 0.004 | 0.001  | 0.001   | 0.070   | 0.032   | 0.026   | 0.756   | 0.888   |
| 50                | 0.001                            | 0.001 | 0.001 | 0.001  | 0.001   | 0.019   | 0.025   | 0.021   | 0.366   | 0.853   |

Two-way repeated measures ANOVA, Tukey's post-hoc,  $p \leq 0.05$

**CHEMICAL:  $\alpha$ -Naphthoflavone**

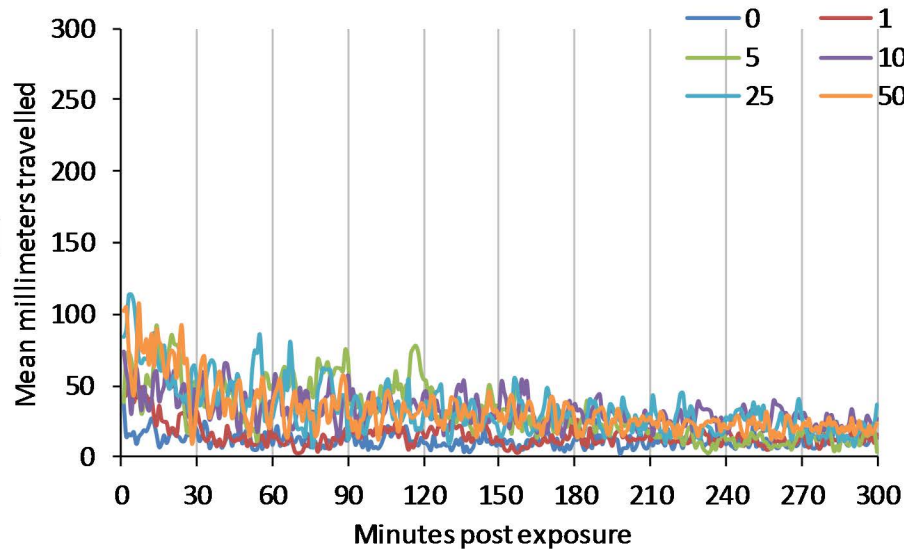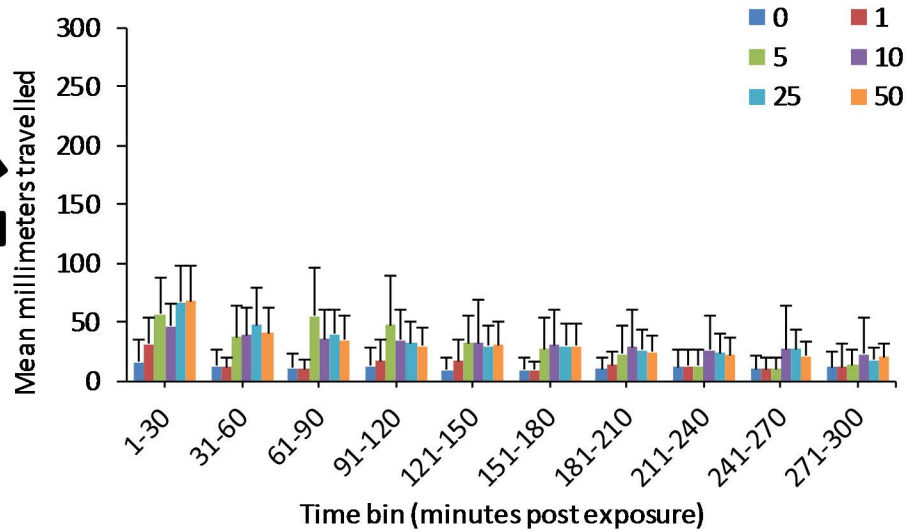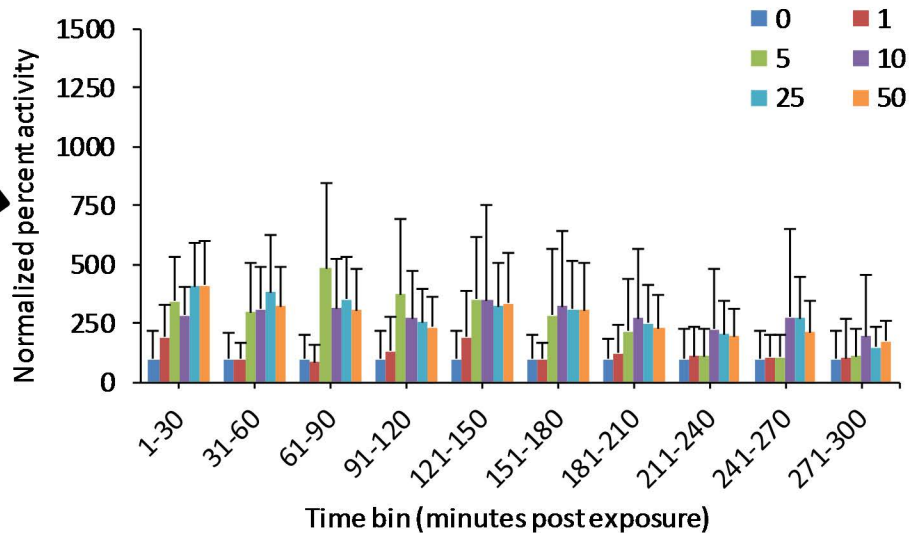

**Normalized percent activity**

|            | Time bin (minutes post exposure) |               |               |               |               |               |               |               |               |               |    |
|------------|----------------------------------|---------------|---------------|---------------|---------------|---------------|---------------|---------------|---------------|---------------|----|
| [ $\mu$ M] | 1-30                             | 31-60         | 61-90         | 91-120        | 121-150       | 151-180       | 181-210       | 211-240       | 241-270       | 271-300       | N  |
| 0          | 100 $\pm$ 117                    | 100 $\pm$ 115 | 100 $\pm$ 101 | 100 $\pm$ 118 | 100 $\pm$ 120 | 100 $\pm$ 102 | 100 $\pm$ 88  | 100 $\pm$ 129 | 100 $\pm$ 122 | 100 $\pm$ 115 | 16 |
| 1          | 192 $\pm$ 133                    | 97 $\pm$ 68   | 87 $\pm$ 69   | 132 $\pm$ 150 | 190 $\pm$ 202 | 97 $\pm$ 74   | 125 $\pm$ 119 | 112 $\pm$ 125 | 105 $\pm$ 100 | 102 $\pm$ 170 | 16 |
| 5          | 343 $\pm$ 189                    | 296 $\pm$ 212 | 484 $\pm$ 364 | 373 $\pm$ 325 | 353 $\pm$ 261 | 286 $\pm$ 284 | 216 $\pm$ 226 | 110 $\pm$ 116 | 107 $\pm$ 93  | 112 $\pm$ 113 | 16 |
| 10         | 285 $\pm$ 118                    | 311 $\pm$ 181 | 313 $\pm$ 215 | 273 $\pm$ 201 | 349 $\pm$ 408 | 323 $\pm$ 316 | 273 $\pm$ 294 | 225 $\pm$ 254 | 274 $\pm$ 373 | 196 $\pm$ 263 | 16 |
| 25         | 407 $\pm$ 186                    | 381 $\pm$ 247 | 352 $\pm$ 179 | 256 $\pm$ 143 | 321 $\pm$ 186 | 309 $\pm$ 204 | 249 $\pm$ 169 | 205 $\pm$ 143 | 271 $\pm$ 176 | 148 $\pm$ 88  | 16 |
| 50         | 413 $\pm$ 186                    | 322 $\pm$ 172 | 305 $\pm$ 176 | 234 $\pm$ 128 | 335 $\pm$ 213 | 308 $\pm$ 199 | 230 $\pm$ 138 | 194 $\pm$ 122 | 213 $\pm$ 132 | 175 $\pm$ 91  | 16 |

**Mean  $\pm$  standard deviation**

**Normalized percent activity**

|            | Time bin (minutes post exposure) |         |         |         |         |         |         |         |         |         |
|------------|----------------------------------|---------|---------|---------|---------|---------|---------|---------|---------|---------|
| [ $\mu$ M] | 1-30                             | 31-60   | 61-90   | 91-120  | 121-150 | 151-180 | 181-210 | 211-240 | 241-270 | 271-300 |
| 0          | 42-158                           | 43-157  | 50-150  | 41-159  | 40-160  | 49-151  | 56-144  | 35-165  | 39-161  | 42-158  |
| 1          | 125-259                          | 63-131  | 53-122  | 57-207  | 89-291  | 60-134  | 66-184  | 49-174  | 55-155  | 17-187  |
| 5          | 249-438                          | 190-402 | 302-666 | 210-535 | 222-483 | 144-427 | 103-329 | 52-169  | 60-153  | 55-168  |
| 10         | 227-344                          | 221-401 | 205-420 | 172-373 | 145-553 | 165-481 | 126-421 | 98-353  | 88-461  | 65-328  |
| 25         | 314-501                          | 258-505 | 262-441 | 185-328 | 228-414 | 207-411 | 165-334 | 134-277 | 183-359 | 104-192 |
| 50         | 320-505                          | 236-408 | 217-393 | 170-297 | 229-442 | 208-407 | 161-299 | 133-255 | 147-279 | 130-220 |

**95% confidence interval**

**p-values**

|            | Time bin (minutes post exposure) |       |       |        |         |         |         |         |         |         |
|------------|----------------------------------|-------|-------|--------|---------|---------|---------|---------|---------|---------|
| [ $\mu$ M] | 1-30                             | 31-60 | 61-90 | 91-120 | 121-150 | 151-180 | 181-210 | 211-240 | 241-270 | 271-300 |
| 1          | 0.046                            | 0.999 | 1.000 | 0.926  | 0.445   | 1.000   | 0.998   | 0.962   | 0.998   | 1.000   |
| 5          | 0.001                            | 0.002 | 0.001 | 0.001  | 0.001   | 0.012   | 0.437   | 0.994   | 1.000   | 1.000   |
| 10         | 0.001                            | 0.001 | 0.001 | 0.001  | 0.003   | 0.001   | 0.020   | 0.024   | 0.053   | 0.356   |
| 25         | 0.001                            | 0.001 | 0.001 | 0.001  | 0.001   | 0.002   | 0.045   | 0.054   | 0.015   | 0.485   |
| 50         | 0.001                            | 0.001 | 0.001 | 0.002  | 0.001   | 0.001   | 0.032   | 0.025   | 0.052   | 0.106   |

Two-way repeated measures ANOVA, Tukey's post-hoc,  $p \leq 0.05$



# CHEMICAL: $\beta$ -Naphthoflavone

## Normalized percent activity

## Time bin (minutes post exposure)

| [ $\mu$ M] | 1-30          | 31-60         | 61-90         | 91-120        | 121-150       | 151-180       | 181-210       | 211-240       | 241-270       | 271-300       | N  |
|------------|---------------|---------------|---------------|---------------|---------------|---------------|---------------|---------------|---------------|---------------|----|
| 0          | 100 $\pm$ 93  | 100 $\pm$ 105 | 100 $\pm$ 92  | 100 $\pm$ 89  | 100 $\pm$ 86  | 100 $\pm$ 85  | 100 $\pm$ 120 | 100 $\pm$ 88  | 100 $\pm$ 78  | 100 $\pm$ 64  | 16 |
| 1          | 119 $\pm$ 109 | 116 $\pm$ 98  | 93 $\pm$ 111  | 83 $\pm$ 95   | 116 $\pm$ 124 | 84 $\pm$ 85   | 67 $\pm$ 67   | 130 $\pm$ 145 | 112 $\pm$ 130 | 166 $\pm$ 264 | 16 |
| 5          | 138 $\pm$ 147 | 136 $\pm$ 110 | 115 $\pm$ 77  | 94 $\pm$ 80   | 84 $\pm$ 40   | 136 $\pm$ 160 | 119 $\pm$ 139 | 157 $\pm$ 139 | 110 $\pm$ 82  | 162 $\pm$ 137 | 16 |
| 10         | 118 $\pm$ 103 | 179 $\pm$ 164 | 150 $\pm$ 109 | 85 $\pm$ 67   | 114 $\pm$ 100 | 102 $\pm$ 98  | 74 $\pm$ 50   | 126 $\pm$ 63  | 116 $\pm$ 80  | 103 $\pm$ 75  | 16 |
| 25         | 110 $\pm$ 107 | 155 $\pm$ 139 | 110 $\pm$ 89  | 87 $\pm$ 132  | 107 $\pm$ 142 | 124 $\pm$ 174 | 83 $\pm$ 102  | 144 $\pm$ 133 | 122 $\pm$ 157 | 137 $\pm$ 179 | 16 |
| 50         | 267 $\pm$ 259 | 190 $\pm$ 126 | 324 $\pm$ 245 | 106 $\pm$ 110 | 102 $\pm$ 79  | 97 $\pm$ 84   | 90 $\pm$ 78   | 121 $\pm$ 80  | 129 $\pm$ 103 | 129 $\pm$ 105 | 16 |

## Mean $\pm$ standard deviation

## Normalized percent activity

## Time bin (minutes post exposure)

| [ $\mu$ M] | 1-30    | 31-60   | 61-90   | 91-120 | 121-150 | 151-180 | 181-210 | 211-240 | 241-270 | 271-300 |
|------------|---------|---------|---------|--------|---------|---------|---------|---------|---------|---------|
| 0          | 53-147  | 47-153  | 54-146  | 56-144 | 57-143  | 58-142  | 40-160  | 56-144  | 61-139  | 68-132  |
| 1          | 65-174  | 67-165  | 38-149  | 35-130 | 54-178  | 41-126  | 34-101  | 58-202  | 47-177  | 34-298  |
| 5          | 64-211  | 81-191  | 77-154  | 54-134 | 64-104  | 56-215  | 50-189  | 88-227  | 69-151  | 94-231  |
| 10         | 67-170  | 97-260  | 95-205  | 52-119 | 64-165  | 53-151  | 49-99   | 95-158  | 76-156  | 65-140  |
| 25         | 57-164  | 60-249  | 15-204  | 21-153 | 35-178  | 37-211  | 32-134  | 53-236  | 43-200  | 47-226  |
| 50         | 137-397 | 127-254 | 201-447 | 51-162 | 62-141  | 55-139  | 51-129  | 81-162  | 78-181  | 76-181  |

## 95% confidence interval

## p-values

## Time bin (minutes post exposure)

| [ $\mu$ M] | 1-30  | 31-60 | 61-90 | 91-120 | 121-150 | 151-180 | 181-210 | 211-240 | 241-270 | 271-300 |
|------------|-------|-------|-------|--------|---------|---------|---------|---------|---------|---------|
| 1          | 0.969 | 0.982 | 1.000 | 0.966  | 1.000   | 0.985   | 0.964   | 0.983   | 1.000   | 1.000   |
| 5          | 0.771 | 0.871 | 0.977 | 1.000  | 1.000   | 0.979   | 0.954   | 0.527   | 0.960   | 0.838   |
| 10         | 0.944 | 0.261 | 0.645 | 1.000  | 0.994   | 1.000   | 1.000   | 0.740   | 0.960   | 1.000   |
| 25         | 0.938 | 0.962 | 1.000 | 0.930  | 1.000   | 1.000   | 1.000   | 0.958   | 0.993   | 1.000   |
| 50         | 0.010 | 0.153 | 0.003 | 1.000  | 1.000   | 1.000   | 1.000   | 0.948   | 0.931   | 0.994   |

## Two-way repeated measures ANOVA, Tukey's post-hoc, $p \leq 0.05$

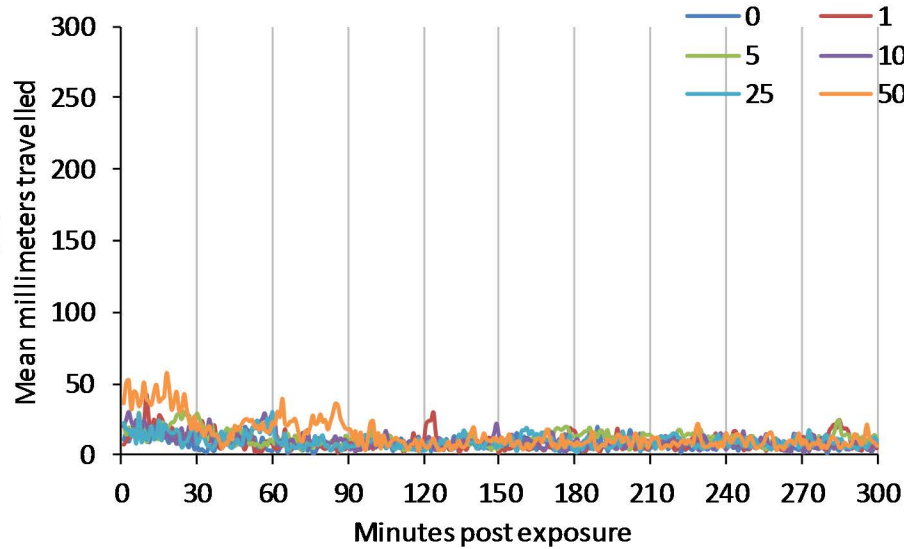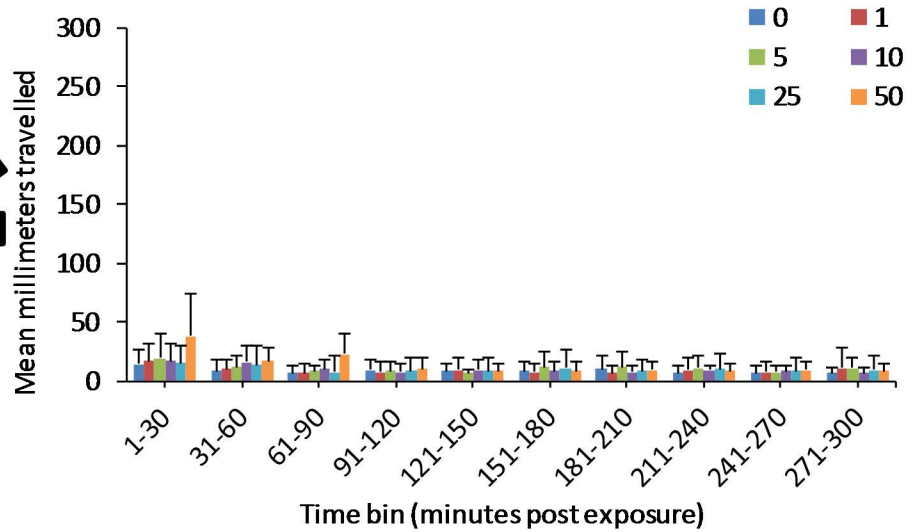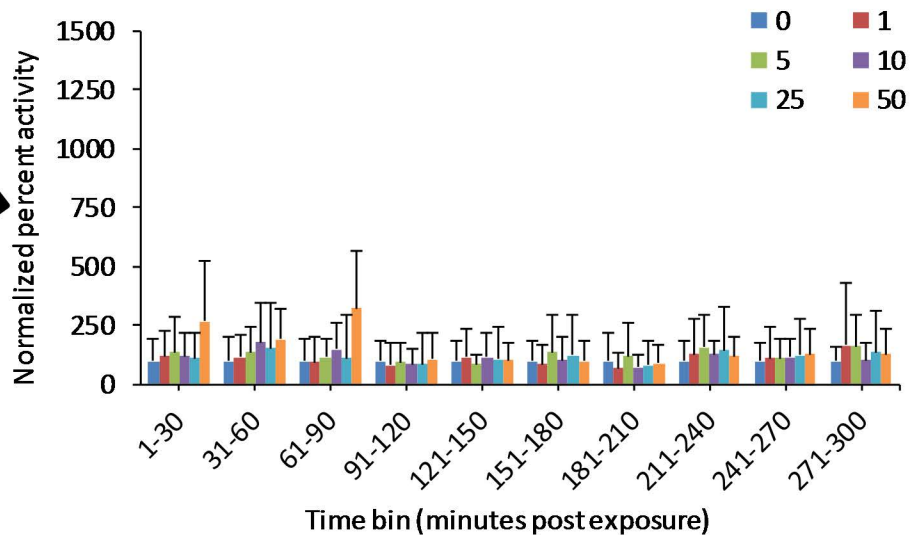

# CHEMICAL: Apigenin

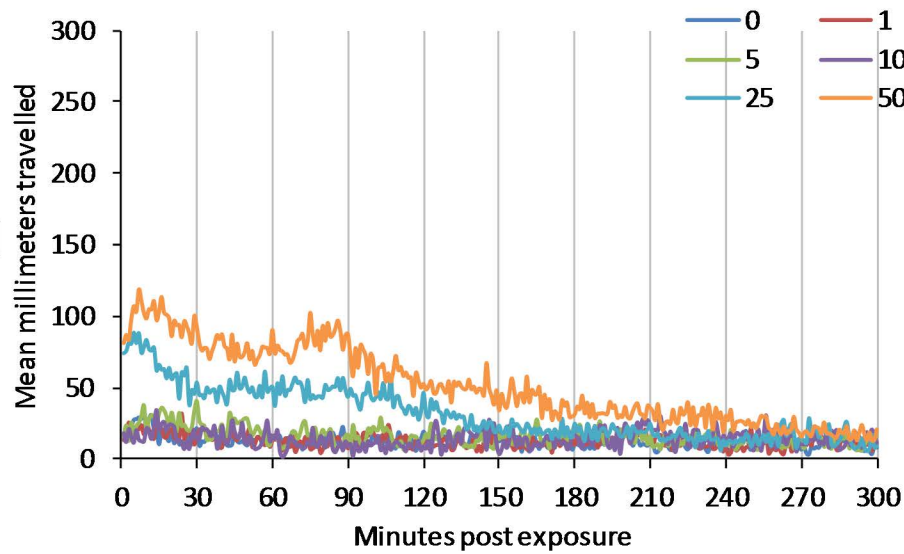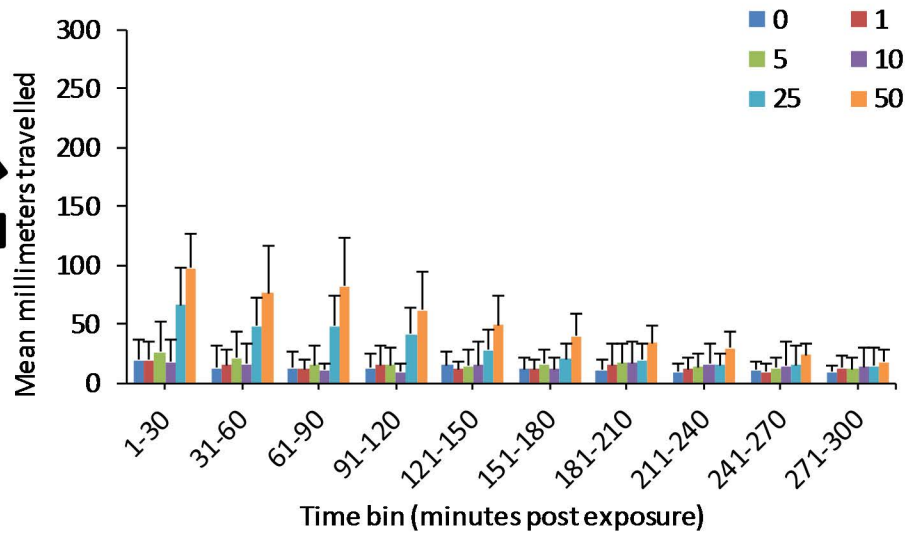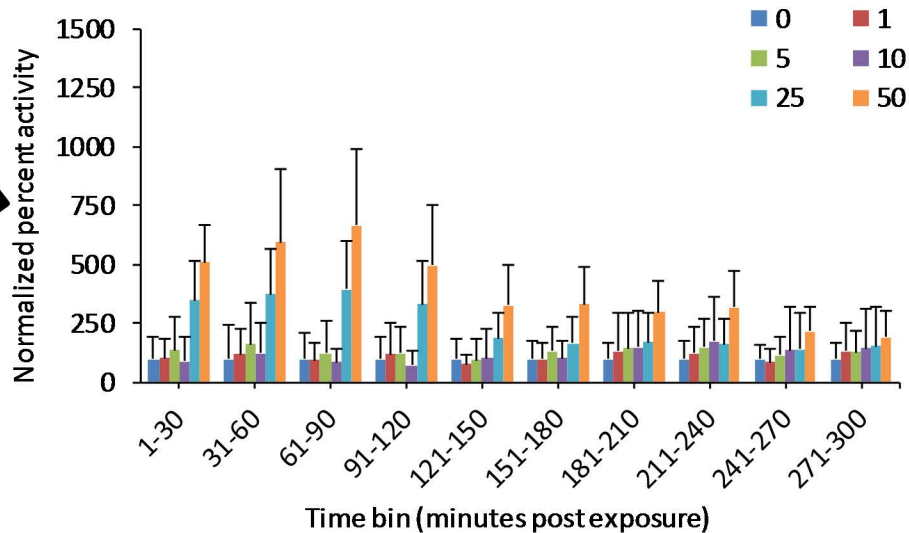

## Normalized percent activity

|                   | Time bin (minutes post exposure) |           |           |           |           |           |           |           |           |           |    |
|-------------------|----------------------------------|-----------|-----------|-----------|-----------|-----------|-----------|-----------|-----------|-----------|----|
| [ $\mu\text{M}$ ] | 1-30                             | 31-60     | 61-90     | 91-120    | 121-150   | 151-180   | 181-210   | 211-240   | 241-270   | 271-300   | N  |
| 0                 | 100 ± 92                         | 100 ± 142 | 100 ± 111 | 100 ± 97  | 100 ± 82  | 100 ± 78  | 100 ± 72  | 100 ± 74  | 100 ± 64  | 100 ± 65  | 16 |
| 1                 | 102 ± 84                         | 119 ± 106 | 95 ± 73   | 119 ± 134 | 77 ± 45   | 97 ± 69   | 133 ± 161 | 125 ± 115 | 87 ± 60   | 134 ± 115 | 16 |
| 5                 | 138 ± 137                        | 162 ± 176 | 125 ± 136 | 123 ± 113 | 95 ± 90   | 131 ± 108 | 146 ± 150 | 147 ± 123 | 116 ± 77  | 129 ± 92  | 16 |
| 10                | 91 ± 99                          | 123 ± 131 | 88 ± 53   | 74 ± 61   | 103 ± 126 | 101 ± 76  | 150 ± 157 | 174 ± 193 | 136 ± 187 | 144 ± 168 | 16 |
| 25                | 347 ± 165                        | 374 ± 188 | 394 ± 208 | 331 ± 185 | 186 ± 112 | 168 ± 108 | 172 ± 127 | 161 ± 110 | 140 ± 153 | 155 ± 169 | 16 |
| 50                | 509 ± 165                        | 593 ± 309 | 668 ± 324 | 496 ± 259 | 325 ± 173 | 331 ± 162 | 296 ± 132 | 318 ± 157 | 217 ± 100 | 190 ± 115 | 16 |

## Mean ± standard deviation

## Normalized percent activity

|                   | Time bin (minutes post exposure) |         |         |         |         |         |         |         |         |         |
|-------------------|----------------------------------|---------|---------|---------|---------|---------|---------|---------|---------|---------|
| [ $\mu\text{M}$ ] | 1-30                             | 31-60   | 61-90   | 91-120  | 121-150 | 151-180 | 181-210 | 211-240 | 241-270 | 271-300 |
| 0                 | 54-146                           | 29-171  | 45-155  | 51-149  | 59-141  | 61-139  | 64-136  | 63-137  | 68-132  | 68-132  |
| 1                 | 59-144                           | 66-172  | 58-131  | 52-186  | 54-99   | 62-131  | 52-214  | 67-182  | 57-117  | 76-191  |
| 5                 | 69-207                           | 74-250  | 58-193  | 66-179  | 50-140  | 77-185  | 71-221  | 86-209  | 78-155  | 83-175  |
| 10                | 42-141                           | 58-189  | 61-114  | 44-105  | 40-166  | 64-139  | 71-228  | 78-271  | 43-230  | 60-229  |
| 25                | 265-430                          | 280-468 | 290-498 | 239-424 | 129-242 | 114-221 | 108-235 | 106-216 | 63-216  | 71-240  |
| 50                | 432-586                          | 438-747 | 506-830 | 366-625 | 239-411 | 250-412 | 229-362 | 240-396 | 167-267 | 132-247 |

## 95% confidence interval

## p-values

|                   | Time bin (minutes post exposure) |       |       |        |         |         |         |         |         |         |
|-------------------|----------------------------------|-------|-------|--------|---------|---------|---------|---------|---------|---------|
| [ $\mu\text{M}$ ] | 1-30                             | 31-60 | 61-90 | 91-120 | 121-150 | 151-180 | 181-210 | 211-240 | 241-270 | 271-300 |
| 1                 | 1.000                            | 0.740 | 1.000 | 0.998  | 0.996   | 1.000   | 0.995   | 0.987   | 0.998   | 0.944   |
| 5                 | 0.954                            | 0.349 | 0.994 | 0.977  | 0.999   | 0.987   | 0.988   | 0.780   | 0.995   | 0.881   |
| 10                | 1.000                            | 0.679 | 1.000 | 0.869  | 1.000   | 1.000   | 0.939   | 0.698   | 1.000   | 0.917   |
| 25                | 0.001                            | 0.001 | 0.001 | 0.001  | 0.094   | 0.266   | 0.324   | 0.457   | 0.993   | 0.773   |
| 50                | 0.001                            | 0.001 | 0.001 | 0.001  | 0.001   | 0.001   | 0.001   | 0.001   | 0.018   | 0.105   |

Two-way repeated measures ANOVA, Tukey's post-hoc,  $p \leq 0.05$

# CHEMICAL: Biochanin A

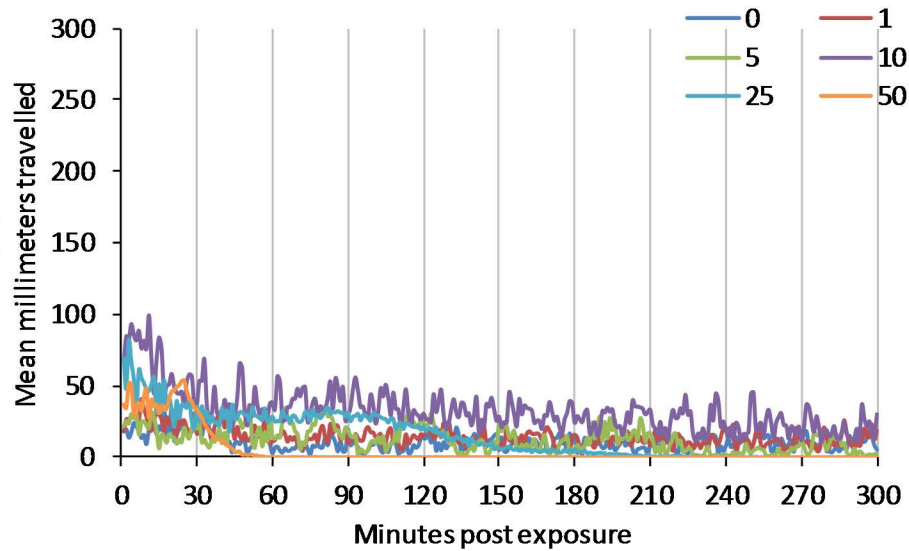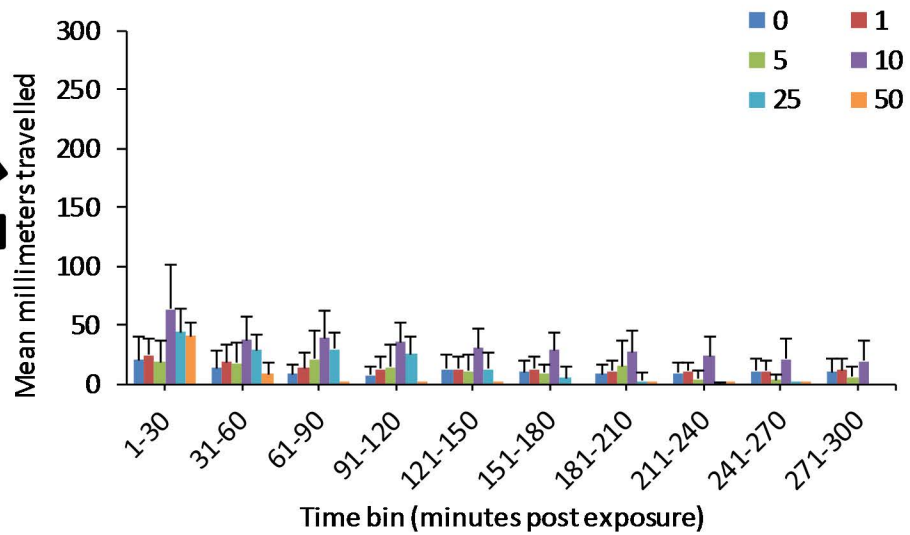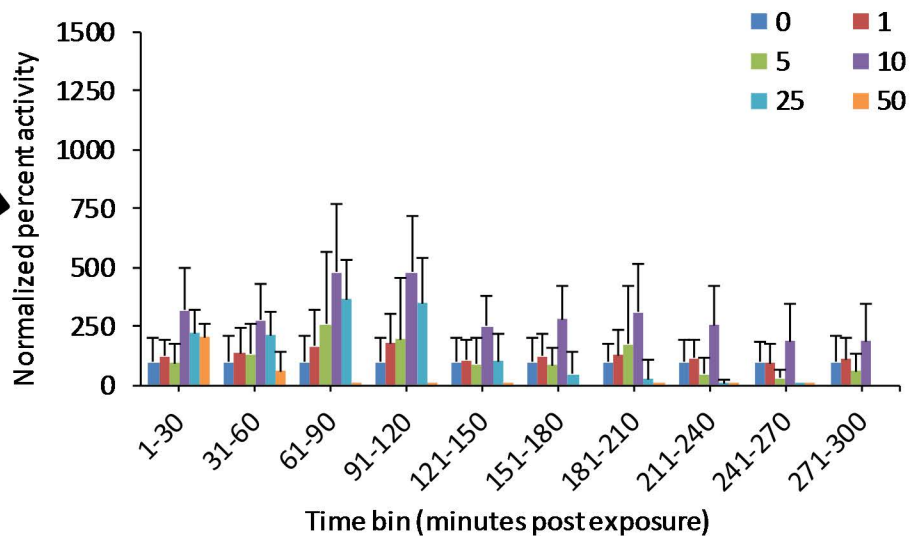

## Normalized percent activity

| [μM] | Time bin (minutes post exposure) |           |           |           |           |           |           |           |           |           | N  |
|------|----------------------------------|-----------|-----------|-----------|-----------|-----------|-----------|-----------|-----------|-----------|----|
|      | 1-30                             | 31-60     | 61-90     | 91-120    | 121-150   | 151-180   | 181-210   | 211-240   | 241-270   | 271-300   |    |
| 0    | 100 ± 103                        | 100 ± 110 | 100 ± 114 | 100 ± 100 | 100 ± 100 | 100 ± 98  | 100 ± 79  | 100 ± 97  | 100 ± 87  | 100 ± 109 | 16 |
| 1    | 122 ± 72                         | 137 ± 109 | 168 ± 156 | 178 ± 129 | 105 ± 90  | 124 ± 98  | 128 ± 104 | 116 ± 81  | 95 ± 82   | 111 ± 94  | 16 |
| 5    | 94 ± 87                          | 132 ± 130 | 258 ± 312 | 197 ± 258 | 89 ± 117  | 87 ± 77   | 176 ± 250 | 47 ± 72   | 31 ± 35   | 60 ± 78   | 16 |
| 10   | 317 ± 184                        | 278 ± 150 | 480 ± 286 | 481 ± 237 | 250 ± 130 | 281 ± 144 | 309 ± 204 | 253 ± 171 | 186 ± 161 | 187 ± 159 | 16 |
| 25   | 220 ± 99                         | 212 ± 99  | 364 ± 170 | 346 ± 191 | 102 ± 118 | 47 ± 94   | 25 ± 86   | 4 ± 18    | 1 ± 2     | 0 ± 0     | 16 |
| 50   | 202 ± 57                         | 60 ± 79   | 0 ± 1     | 0 ± 0     | 0 ± 1     | 0 ± 0     | 0 ± 0     | 0 ± 1     | 0 ± 0     | 0 ± 0     | 16 |

## Mean ± standard deviation

## Normalized percent activity

| [μM] | Time bin (minutes post exposure) |         |         |         |         |         |         |         |         |         |
|------|----------------------------------|---------|---------|---------|---------|---------|---------|---------|---------|---------|
|      | 1-30                             | 31-60   | 61-90   | 91-120  | 121-150 | 151-180 | 181-210 | 211-240 | 241-270 | 271-300 |
| 0    | 48-152                           | 45-155  | 43-157  | 50-150  | 50-150  | 51-149  | 60-140  | 52-148  | 57-143  | 45-155  |
| 1    | 86-158                           | 82-191  | 89-246  | 114-242 | 60-150  | 75-173  | 75-180  | 76-157  | 54-136  | 64-158  |
| 5    | 51-137                           | 67-198  | 102-414 | 68-326  | 31-148  | 48-125  | 51-301  | 11-83   | 13-48   | 21-98   |
| 10   | 225-409                          | 202-353 | 337-623 | 362-599 | 185-315 | 209-353 | 207-410 | 168-339 | 106-267 | 108-266 |
| 25   | 171-270                          | 163-261 | 279-449 | 250-442 | 43-161  | 0-94    | -18-68  | -4-13   | 0-2     | 0-0     |
| 50   | 174-231                          | 20-99   | 0-1     | 0-0     | 0-1     | 0-0     | 0-0     | 0-0     | 0-0     | 0-0     |

## 95% confidence interval

## p-values

| [μM] | Time bin (minutes post exposure) |       |       |        |         |         |         |         |         |         |
|------|----------------------------------|-------|-------|--------|---------|---------|---------|---------|---------|---------|
|      | 1-30                             | 31-60 | 61-90 | 91-120 | 121-150 | 151-180 | 181-210 | 211-240 | 241-270 | 271-300 |
| 1    | 0.711                            | 0.403 | 0.594 | 0.347  | 1.000   | 0.783   | 0.986   | 0.930   | 0.999   | 0.992   |
| 5    | 1.000                            | 0.837 | 0.464 | 0.988  | 0.843   | 0.999   | 1.000   | 0.037   | 0.003   | 0.315   |
| 10   | 0.001                            | 0.001 | 0.001 | 0.001  | 0.001   | 0.001   | 0.001   | 0.004   | 0.411   | 0.134   |
| 25   | 0.001                            | 0.001 | 0.001 | 0.001  | 0.800   | 0.001   | 0.001   | 0.001   | 0.001   | 0.001   |
| 50   | 0.001                            | 0.146 | 0.001 | 0.001  | 0.001   | 0.001   | 0.001   | 0.001   | 0.001   | 0.001   |

Two-way repeated measures ANOVA, Tukey's post-hoc,  $p \leq 0.05$

# CHEMICAL: Chrysin

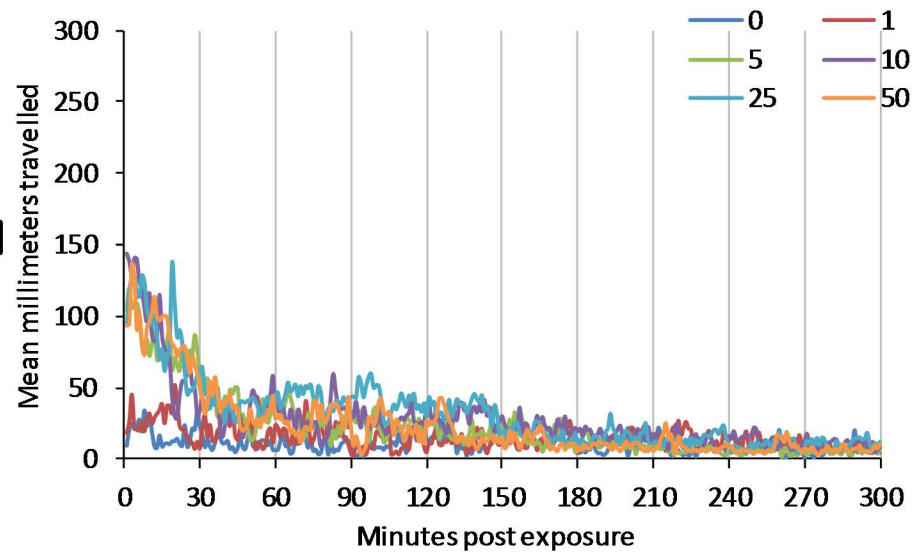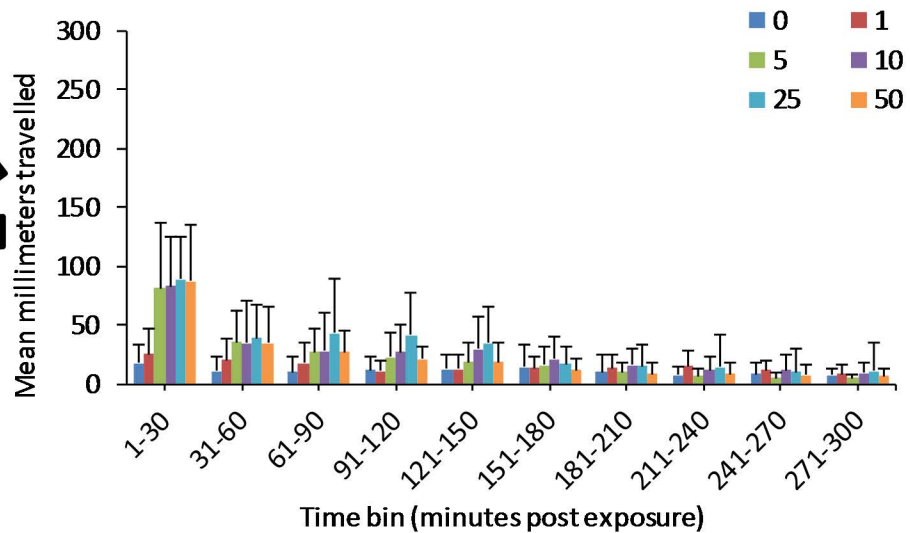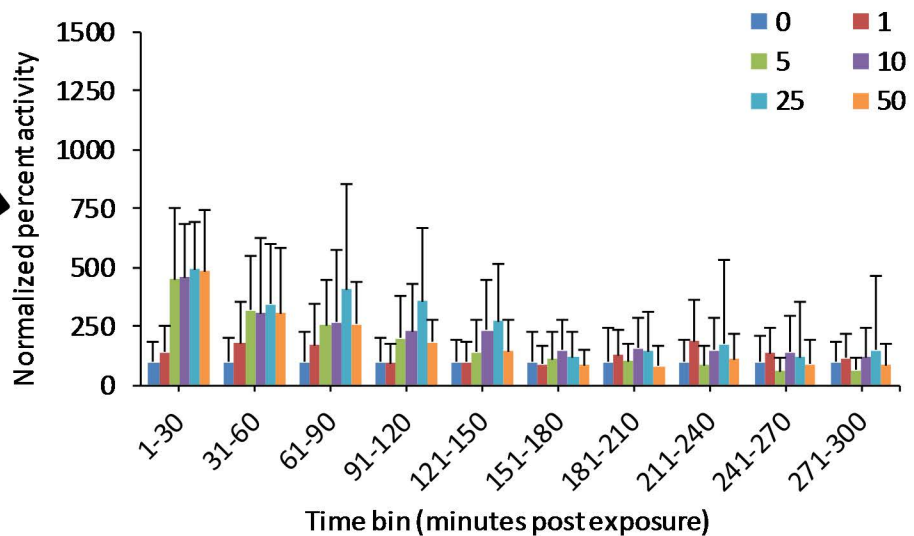

## Normalized percent activity

| [μM] | Time bin (minutes post exposure) |           |           |           |           |           |           |           |           |           | N  |
|------|----------------------------------|-----------|-----------|-----------|-----------|-----------|-----------|-----------|-----------|-----------|----|
|      | 1-30                             | 31-60     | 61-90     | 91-120    | 121-150   | 151-180   | 181-210   | 211-240   | 241-270   | 271-300   |    |
| 0    | 100 ± 83                         | 100 ± 103 | 100 ± 129 | 100 ± 100 | 100 ± 98  | 100 ± 129 | 100 ± 146 | 100 ± 94  | 100 ± 114 | 100 ± 84  | 16 |
| 1    | 140 ± 116                        | 180 ± 171 | 172 ± 171 | 93 ± 82   | 96 ± 93   | 92 ± 73   | 128 ± 105 | 186 ± 175 | 137 ± 108 | 116 ± 102 | 16 |
| 5    | 448 ± 305                        | 317 ± 231 | 255 ± 194 | 199 ± 179 | 142 ± 134 | 111 ± 113 | 101 ± 75  | 86 ± 86   | 62 ± 53   | 66 ± 51   | 16 |
| 10   | 457 ± 231                        | 308 ± 316 | 269 ± 302 | 229 ± 203 | 232 ± 218 | 149 ± 126 | 157 ± 131 | 149 ± 138 | 139 ± 155 | 120 ± 127 | 16 |
| 25   | 492 ± 200                        | 345 ± 254 | 409 ± 443 | 357 ± 311 | 271 ± 243 | 119 ± 106 | 144 ± 171 | 176 ± 356 | 118 ± 239 | 150 ± 318 | 16 |
| 50   | 483 ± 262                        | 307 ± 278 | 261 ± 174 | 181 ± 97  | 146 ± 130 | 84 ± 69   | 81 ± 89   | 110 ± 108 | 90 ± 103  | 87 ± 91   | 16 |

## Mean ± standard deviation

## Normalized percent activity

| [μM] | Time bin (minutes post exposure) |         |         |         |         |         |         |         |         |         |
|------|----------------------------------|---------|---------|---------|---------|---------|---------|---------|---------|---------|
|      | 1-30                             | 31-60   | 61-90   | 91-120  | 121-150 | 151-180 | 181-210 | 211-240 | 241-270 | 271-300 |
| 0    | 58-142                           | 48-152  | 36-164  | 50-150  | 51-149  | 36-164  | 27-173  | 53-147  | 43-157  | 58-142  |
| 1    | 83-198                           | 94-265  | 86-257  | 52-134  | 50-143  | 55-128  | 76-181  | 99-274  | 83-191  | 65-168  |
| 5    | 295-600                          | 201-432 | 158-352 | 110-289 | 75-209  | 55-168  | 64-139  | 43-129  | 35-88   | 41-92   |
| 10   | 342-572                          | 149-466 | 118-420 | 127-330 | 123-341 | 86-212  | 92-223  | 80-218  | 61-217  | 57-184  |
| 25   | 392-592                          | 218-472 | 187-631 | 202-513 | 150-392 | 66-171  | 59-230  | -2-353  | -1-238  | -9-309  |
| 50   | 352-614                          | 168-446 | 174-349 | 133-229 | 81-211  | 50-119  | 37-126  | 56-164  | 38-142  | 41-132  |

## 95% confidence interval

## p-values

| [μM] | Time bin (minutes post exposure) |       |       |        |         |         |         |         |         |         |
|------|----------------------------------|-------|-------|--------|---------|---------|---------|---------|---------|---------|
|      | 1-30                             | 31-60 | 61-90 | 91-120 | 121-150 | 151-180 | 181-210 | 211-240 | 241-270 | 271-300 |
| 1    | 0.886                            | 0.469 | 0.366 | 1.000  | 1.000   | 1.000   | 0.539   | 0.501   | 0.836   | 1.000   |
| 5    | 0.001                            | 0.001 | 0.002 | 0.293  | 0.846   | 0.998   | 0.965   | 0.974   | 0.795   | 0.893   |
| 10   | 0.001                            | 0.001 | 0.003 | 0.072  | 0.135   | 0.661   | 0.280   | 0.936   | 0.993   | 1.000   |
| 25   | 0.001                            | 0.001 | 0.001 | 0.001  | 0.025   | 0.984   | 0.712   | 1.000   | 0.934   | 1.000   |
| 50   | 0.001                            | 0.001 | 0.002 | 0.101  | 0.868   | 0.995   | 0.996   | 0.998   | 0.894   | 0.873   |

Two-way repeated measures ANOVA, Tukey's post-hoc,  $p \leq 0.05$

# CHEMICAL: Daidzein

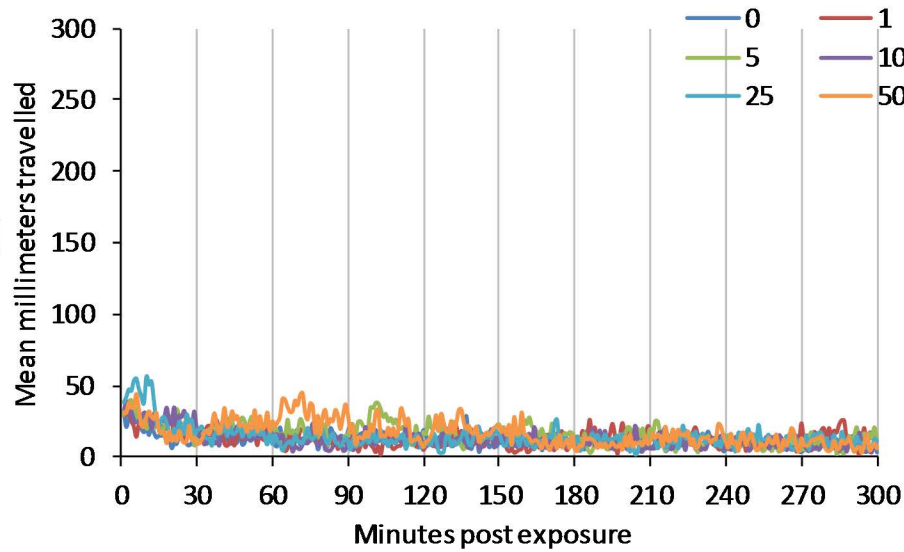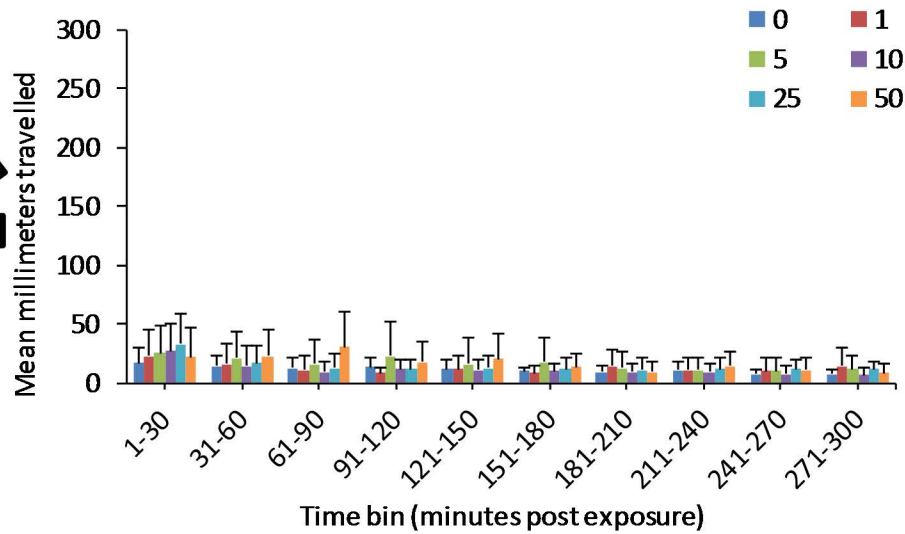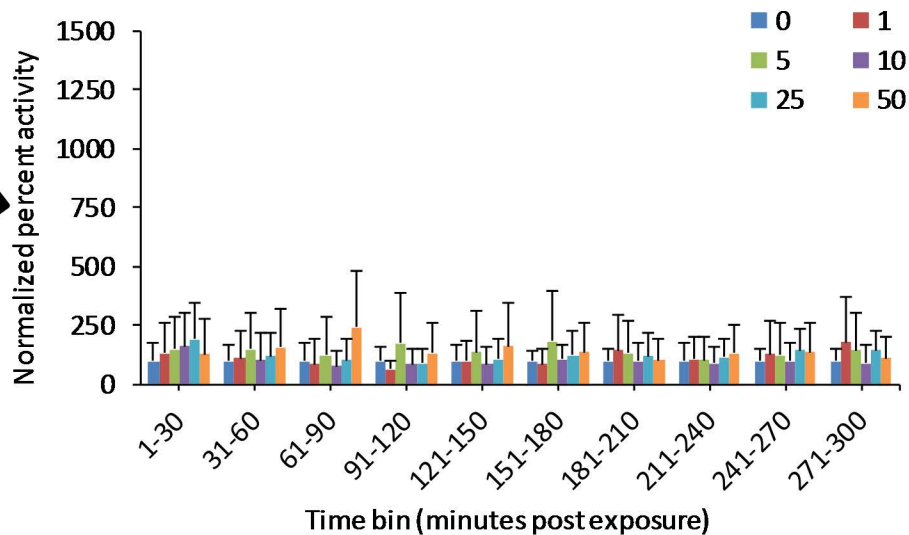

## Normalized percent activity

|                   | Time bin (minutes post exposure) |           |           |           |           |           |           |           |           |           |    |
|-------------------|----------------------------------|-----------|-----------|-----------|-----------|-----------|-----------|-----------|-----------|-----------|----|
| [ $\mu\text{M}$ ] | 1-30                             | 31-60     | 61-90     | 91-120    | 121-150   | 151-180   | 181-210   | 211-240   | 241-270   | 271-300   | N  |
| 0                 | 100 ± 77                         | 100 ± 64  | 100 ± 76  | 100 ± 64  | 100 ± 69  | 100 ± 40  | 100 ± 51  | 100 ± 78  | 100 ± 48  | 100 ± 50  | 16 |
| 1                 | 132 ± 132                        | 111 ± 120 | 86 ± 103  | 66 ± 38   | 97 ± 90   | 87 ± 65   | 146 ± 145 | 106 ± 97  | 129 ± 139 | 177 ± 198 | 16 |
| 5                 | 151 ± 137                        | 151 ± 152 | 126 ± 164 | 173 ± 217 | 135 ± 175 | 181 ± 220 | 131 ± 143 | 103 ± 99  | 123 ± 136 | 146 ± 156 | 16 |
| 10                | 160 ± 140                        | 104 ± 115 | 76 ± 67   | 87 ± 62   | 87 ± 71   | 105 ± 61  | 97 ± 80   | 91 ± 71   | 100 ± 77  | 90 ± 74   | 16 |
| 25                | 193 ± 155                        | 120 ± 102 | 102 ± 90  | 89 ± 63   | 107 ± 90  | 126 ± 102 | 119 ± 101 | 115 ± 81  | 145 ± 95  | 145 ± 86  | 16 |
| 50                | 129 ± 151                        | 158 ± 161 | 241 ± 241 | 134 ± 127 | 164 ± 179 | 135 ± 128 | 101 ± 95  | 132 ± 118 | 135 ± 131 | 111 ± 89  | 16 |

## Mean ± standard deviation

## Normalized percent activity

|                   | Time bin (minutes post exposure) |        |         |        |         |         |         |         |         |         |
|-------------------|----------------------------------|--------|---------|--------|---------|---------|---------|---------|---------|---------|
| [ $\mu\text{M}$ ] | 1-30                             | 31-60  | 61-90   | 91-120 | 121-150 | 151-180 | 181-210 | 211-240 | 241-270 | 271-300 |
| 0                 | 62-138                           | 68-132 | 62-138  | 68-132 | 65-135  | 80-120  | 74-126  | 61-139  | 76-124  | 75-125  |
| 1                 | 66-198                           | 51-171 | 35-138  | 47-85  | 52-142  | 54-120  | 74-219  | 57-154  | 59-199  | 78-276  |
| 5                 | 82-219                           | 75-227 | 44-208  | 64-282 | 47-222  | 71-291  | 59-202  | 54-153  | 54-191  | 67-224  |
| 10                | 90-230                           | 47-162 | 42-109  | 56-118 | 52-123  | 75-136  | 57-138  | 55-127  | 61-138  | 53-127  |
| 25                | 115-271                          | 69-171 | 57-147  | 57-120 | 62-152  | 75-176  | 68-170  | 74-155  | 98-193  | 102-188 |
| 50                | 54-204                           | 78-239 | 121-362 | 70-198 | 74-253  | 71-199  | 53-149  | 73-191  | 69-200  | 67-156  |

## 95% confidence interval

## p-values

|                   | Time bin (minutes post exposure) |       |       |        |         |         |         |         |         |         |
|-------------------|----------------------------------|-------|-------|--------|---------|---------|---------|---------|---------|---------|
| [ $\mu\text{M}$ ] | 1-30                             | 31-60 | 61-90 | 91-120 | 121-150 | 151-180 | 181-210 | 211-240 | 241-270 | 271-300 |
| 1                 | 0.974                            | 0.979 | 0.989 | 0.827  | 0.976   | 0.844   | 1.000   | 0.999   | 1.000   | 0.987   |
| 5                 | 0.855                            | 0.993 | 0.998 | 0.999  | 1.000   | 0.996   | 1.000   | 1.000   | 1.000   | 0.990   |
| 10                | 0.974                            | 0.985 | 0.768 | 0.993  | 0.978   | 1.000   | 0.984   | 0.990   | 0.997   | 0.974   |
| 25                | 0.463                            | 1.000 | 1.000 | 0.999  | 1.000   | 1.000   | 1.000   | 1.000   | 0.981   | 0.904   |
| 50                | 1.000                            | 0.993 | 0.447 | 0.999  | 0.971   | 1.000   | 0.996   | 0.995   | 1.000   | 1.000   |

Two-way repeated measures ANOVA, Tukey's post-hoc,  $p \leq 0.05$

# CHEMICAL: (S)-Equisol

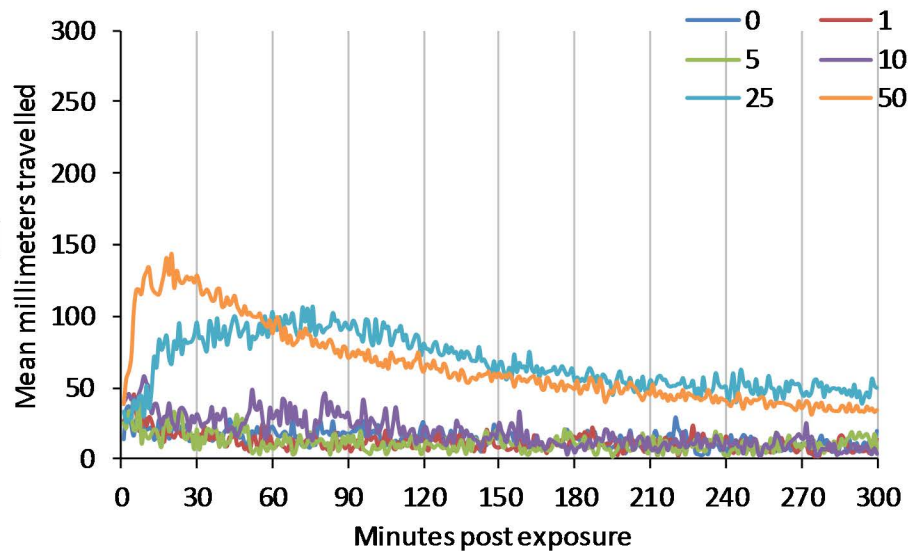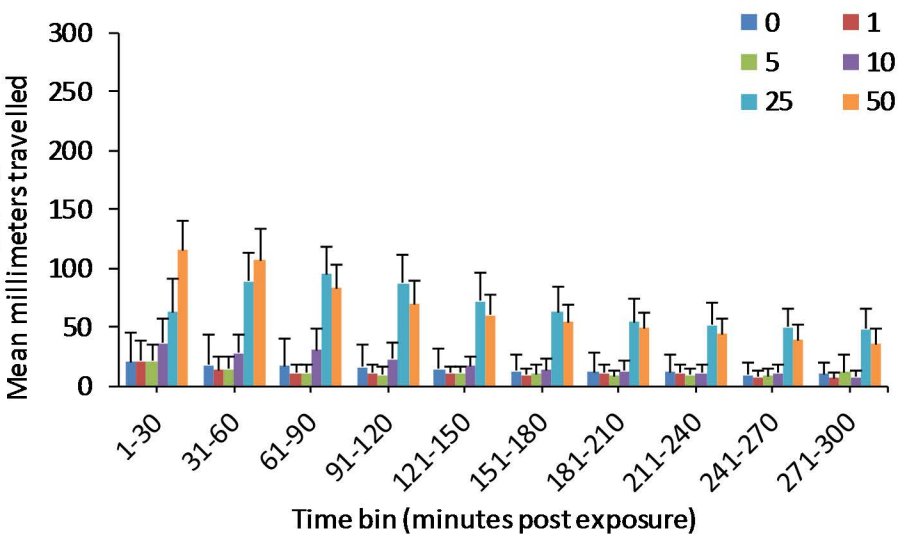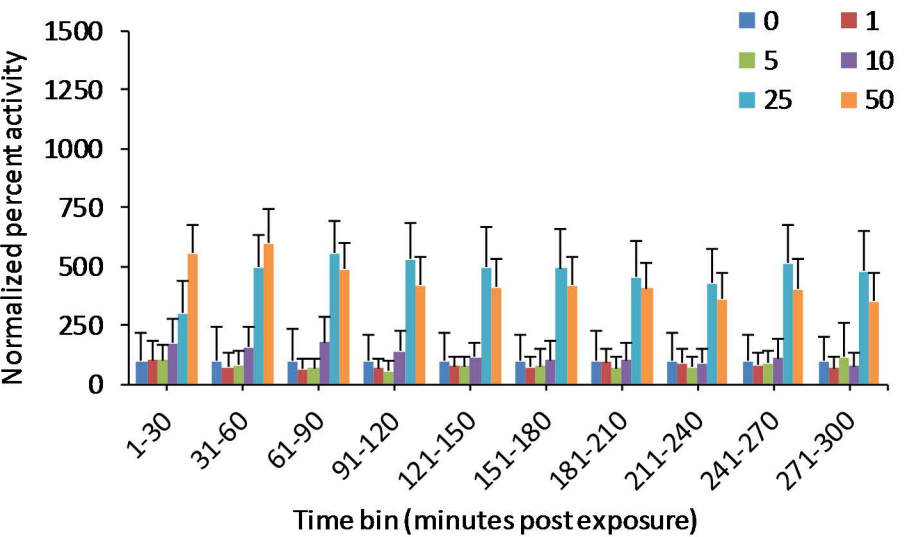

## Normalized percent activity

|                   | Time bin (minutes post exposure) |           |           |           |           |           |           |           |           |           |    |
|-------------------|----------------------------------|-----------|-----------|-----------|-----------|-----------|-----------|-----------|-----------|-----------|----|
| [ $\mu\text{M}$ ] | 1-30                             | 31-60     | 61-90     | 91-120    | 121-150   | 151-180   | 181-210   | 211-240   | 241-270   | 271-300   | N  |
| 0                 | 100 ± 121                        | 100 ± 144 | 100 ± 140 | 100 ± 109 | 100 ± 121 | 100 ± 109 | 100 ± 131 | 100 ± 121 | 100 ± 113 | 100 ± 105 | 16 |
| 1                 | 103 ± 80                         | 75 ± 61   | 63 ± 43   | 68 ± 42   | 76 ± 40   | 74 ± 44   | 95 ± 58   | 91 ± 57   | 81 ± 56   | 70 ± 43   | 16 |
| 5                 | 103 ± 66                         | 80 ± 61   | 67 ± 42   | 56 ± 46   | 76 ± 41   | 77 ± 71   | 70 ± 45   | 74 ± 47   | 88 ± 58   | 117 ± 147 | 16 |
| 10                | 175 ± 104                        | 156 ± 92  | 130 ± 105 | 140 ± 87  | 117 ± 56  | 103 ± 84  | 104 ± 70  | 89 ± 66   | 112 ± 79  | 78 ± 61   | 16 |
| 25                | 304 ± 132                        | 498 ± 136 | 554 ± 137 | 529 ± 151 | 495 ± 169 | 490 ± 168 | 454 ± 159 | 429 ± 150 | 515 ± 163 | 478 ± 170 | 16 |
| 50                | 558 ± 121                        | 597 ± 150 | 486 ± 113 | 422 ± 123 | 411 ± 118 | 421 ± 116 | 406 ± 109 | 361 ± 115 | 404 ± 131 | 352 ± 125 | 16 |

Mean ± standard deviation

## Normalized percent activity

|                   | Time bin (minutes post exposure) |         |         |         |         |         |         |         |         |         |
|-------------------|----------------------------------|---------|---------|---------|---------|---------|---------|---------|---------|---------|
| [ $\mu\text{M}$ ] | 1-30                             | 31-60   | 61-90   | 91-120  | 121-150 | 151-180 | 181-210 | 211-240 | 241-270 | 271-300 |
| 0                 | 40-160                           | 28-172  | 30-170  | 46-154  | 40-160  | 45-155  | 34-166  | 39-161  | 43-157  | 47-153  |
| 1                 | 63-143                           | 44-106  | 42-84   | 47-89   | 56-96   | 52-96   | 66-124  | 62-119  | 53-109  | 48-92   |
| 5                 | 70-136                           | 50-111  | 46-88   | 33-79   | 55-96   | 42-113  | 48-93   | 51-98   | 59-117  | 43-111  |
| 10                | 123-227                          | 110-201 | 127-232 | 97-184  | 89-145  | 62-145  | 70-139  | 56-122  | 73-151  | 47-108  |
| 25                | 237-370                          | 430-566 | 486-623 | 454-605 | 411-580 | 406-574 | 375-533 | 354-504 | 434-597 | 393-563 |
| 50                | 497-618                          | 522-672 | 430-543 | 361-483 | 352-470 | 363-479 | 351-460 | 304-418 | 339-470 | 290-414 |

95% confidence interval

## p-values

|                   | Time bin (minutes post exposure) |       |       |        |         |         |         |         |         |         |
|-------------------|----------------------------------|-------|-------|--------|---------|---------|---------|---------|---------|---------|
| [ $\mu\text{M}$ ] | 1-30                             | 31-60 | 61-90 | 91-120 | 121-150 | 151-180 | 181-210 | 211-240 | 241-270 | 271-300 |
| 1                 | 0.844                            | 1.000 | 0.999 | 0.995  | 1.000   | 1.000   | 0.996   | 1.000   | 0.997   | 0.980   |
| 5                 | 0.780                            | 0.980 | 1.000 | 0.498  | 1.000   | 1.000   | 0.994   | 0.993   | 1.000   | 1.000   |
| 10                | 0.001                            | 0.002 | 0.001 | 0.103  | 0.535   | 0.962   | 0.900   | 1.000   | 0.975   | 0.996   |
| 25                | 0.001                            | 0.001 | 0.001 | 0.001  | 0.001   | 0.001   | 0.001   | 0.001   | 0.001   | 0.001   |
| 50                | 0.001                            | 0.001 | 0.001 | 0.001  | 0.001   | 0.001   | 0.001   | 0.001   | 0.001   | 0.001   |

Two-way repeated measures ANOVA, Tukey's post-hoc,  $p \leq 0.05$

# CHEMICAL: Fisetin

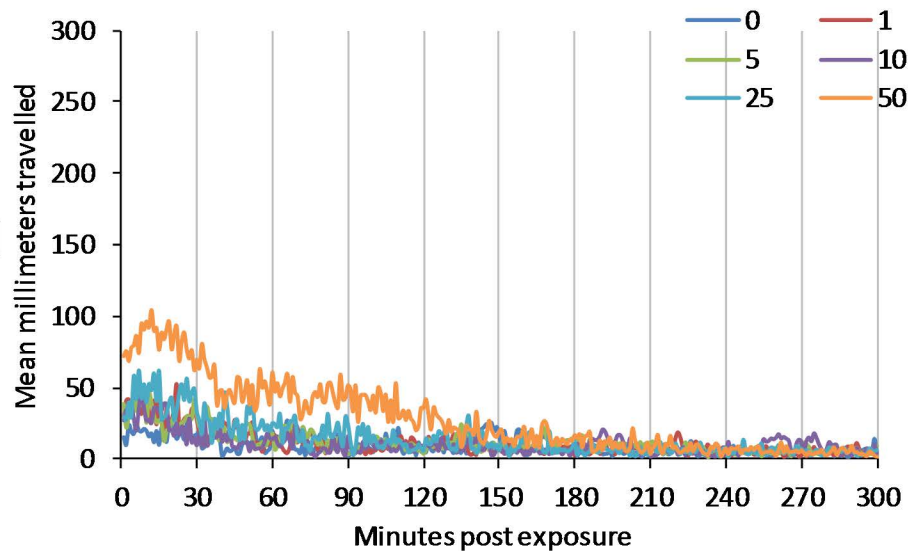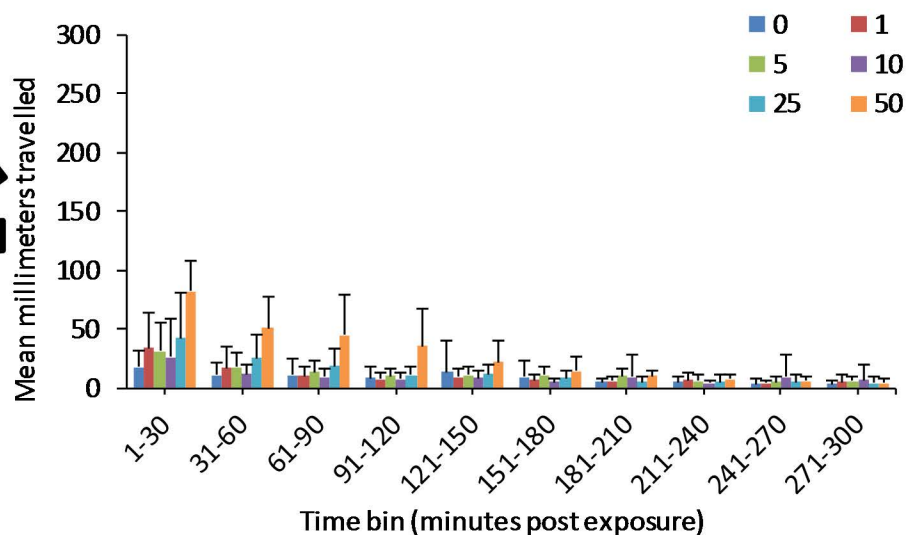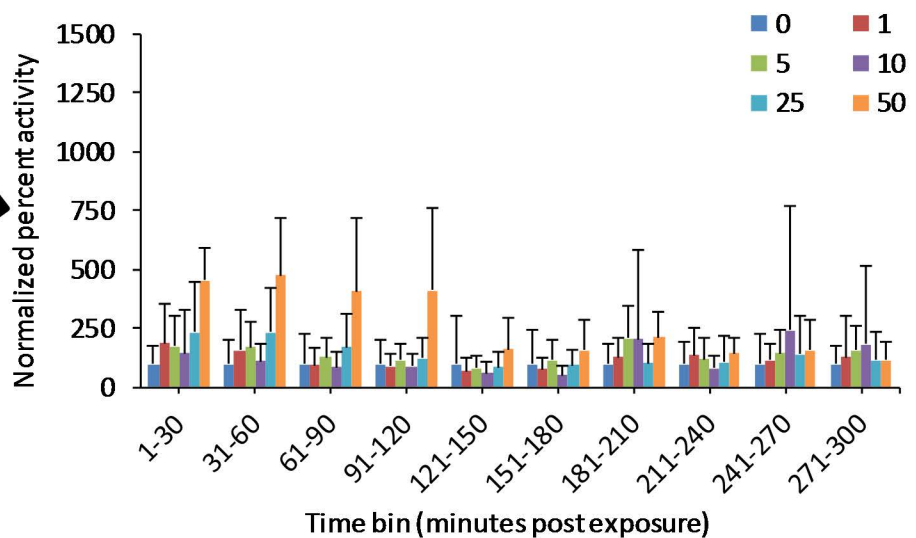

## Normalized percent activity

|                   | Time bin (minutes post exposure) |           |           |           |           |           |           |           |           |           |    |
|-------------------|----------------------------------|-----------|-----------|-----------|-----------|-----------|-----------|-----------|-----------|-----------|----|
| [ $\mu\text{M}$ ] | 1-30                             | 31-60     | 61-90     | 91-120    | 121-150   | 151-180   | 181-210   | 211-240   | 241-270   | 271-300   | N  |
| 0                 | 100 ± 78                         | 100 ± 100 | 100 ± 124 | 100 ± 102 | 100 ± 200 | 100 ± 145 | 100 ± 81  | 100 ± 93  | 100 ± 128 | 100 ± 78  | 16 |
| 1                 | 187 ± 164                        | 160 ± 172 | 94 ± 71   | 90 ± 52   | 70 ± 55   | 75 ± 54   | 130 ± 79  | 135 ± 116 | 117 ± 68  | 126 ± 178 | 16 |
| 5                 | 174 ± 132                        | 170 ± 111 | 128 ± 85  | 113 ± 71  | 83 ± 50   | 116 ± 83  | 210 ± 132 | 121 ± 89  | 146 ± 98  | 159 ± 105 | 16 |
| 10                | 147 ± 181                        | 113 ± 75  | 87 ± 66   | 89 ± 57   | 60 ± 48   | 53 ± 35   | 202 ± 382 | 80 ± 56   | 244 ± 525 | 181 ± 337 | 16 |
| 25                | 235 ± 209                        | 235 ± 188 | 169 ± 142 | 124 ± 89  | 87 ± 62   | 93 ± 66   | 101 ± 88  | 107 ± 115 | 142 ± 161 | 115 ± 123 | 16 |
| 50                | 454 ± 141                        | 473 ± 242 | 408 ± 312 | 411 ± 349 | 160 ± 135 | 158 ± 131 | 212 ± 112 | 144 ± 69  | 158 ± 126 | 114 ± 79  | 16 |

## Mean ± standard deviation

## Normalized percent activity

|                   | Time bin (minutes post exposure) |         |         |         |         |         |         |         |         |         |
|-------------------|----------------------------------|---------|---------|---------|---------|---------|---------|---------|---------|---------|
| [ $\mu\text{M}$ ] | 1-30                             | 31-60   | 61-90   | 91-120  | 121-150 | 151-180 | 181-210 | 211-240 | 241-270 | 271-300 |
| 0                 | 61-139                           | 50-150  | 38-162  | 49-151  | 0-200   | 27-173  | 59-141  | 53-147  | 36-164  | 61-139  |
| 1                 | 105-268                          | 73-246  | 59-130  | 64-116  | 43-98   | 48-102  | 90-169  | 77-193  | 83-151  | 38-215  |
| 5                 | 108-240                          | 114-225 | 85-170  | 78-149  | 58-108  | 75-158  | 144-276 | 76-166  | 97-195  | 107-212 |
| 10                | 56-238                           | 75-151  | 54-120  | 60-117  | 36-84   | 36-71   | 11-393  | 52-108  | 18-506  | 13-349  |
| 25                | 131-340                          | 141-329 | 98-240  | 80-169  | 56-118  | 60-126  | 57-145  | 50-165  | 61-222  | 54-177  |
| 50                | 383-525                          | 353-594 | 252-564 | 236-585 | 92-227  | 92-224  | 166-267 | 110-179 | 95-221  | 74-163  |

## 95% confidence interval

## p-values

|                   | Time bin (minutes post exposure) |       |       |        |         |         |         |         |         |         |
|-------------------|----------------------------------|-------|-------|--------|---------|---------|---------|---------|---------|---------|
| [ $\mu\text{M}$ ] | 1-30                             | 31-60 | 61-90 | 91-120 | 121-150 | 151-180 | 181-210 | 211-240 | 241-270 | 271-300 |
| 1                 | 0.461                            | 0.554 | 0.993 | 0.994  | 0.963   | 0.998   | 0.834   | 0.879   | 0.731   | 0.998   |
| 5                 | 0.413                            | 0.115 | 0.334 | 0.853  | 0.532   | 0.554   | 0.073   | 0.948   | 0.437   | 0.428   |
| 10                | 0.997                            | 0.812 | 0.984 | 0.999  | 0.993   | 0.993   | 0.671   | 1.000   | 0.461   | 0.918   |
| 25                | 0.155                            | 0.118 | 0.262 | 0.946  | 0.723   | 0.944   | 1.000   | 1.000   | 0.916   | 1.000   |
| 50                | 0.001                            | 0.001 | 0.001 | 0.001  | 0.003   | 0.039   | 0.029   | 0.293   | 0.455   | 0.995   |

Two-way repeated measures ANOVA, Tukey's post-hoc,  $p \leq 0.05$

# CHEMICAL: Flavone

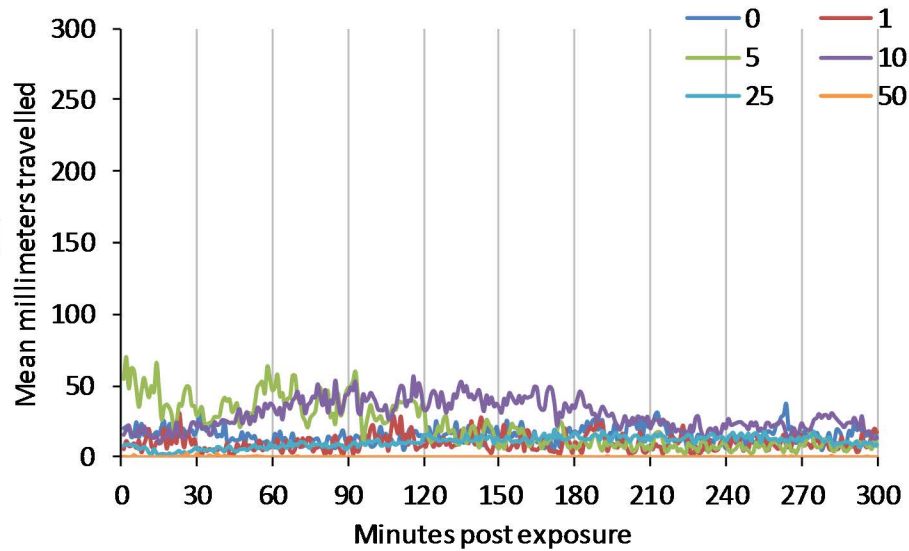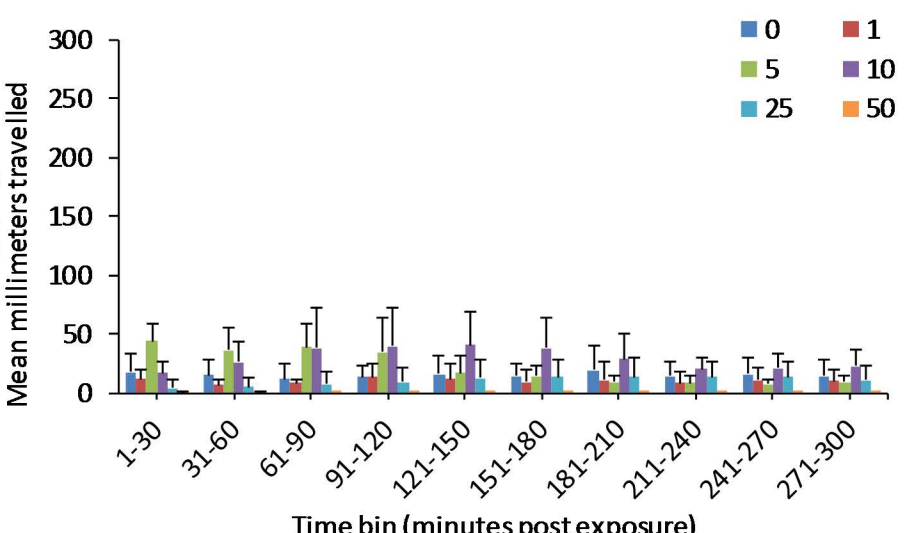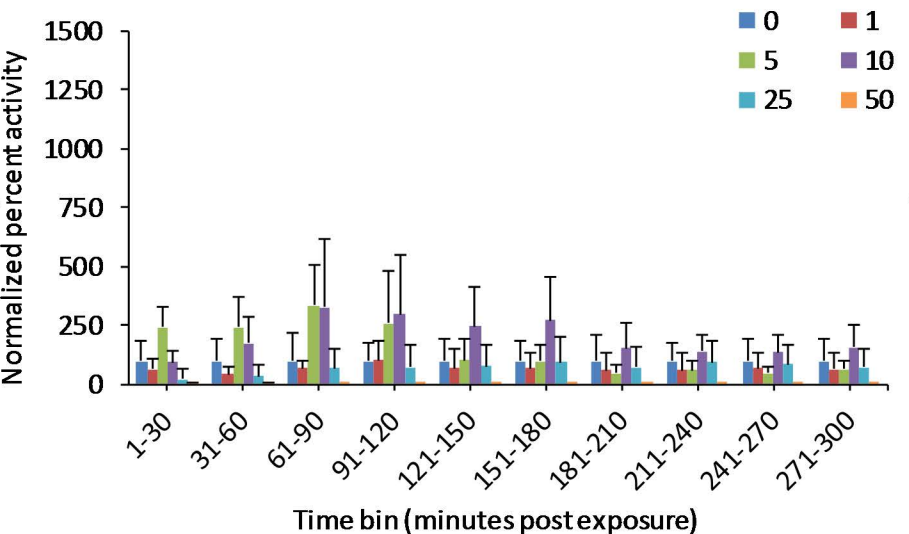

## Normalized percent activity

| [μM] | Time bin (minutes post exposure) |           |           |           |           |           |           |          |          |          | N  |
|------|----------------------------------|-----------|-----------|-----------|-----------|-----------|-----------|----------|----------|----------|----|
|      | 1-30                             | 31-60     | 61-90     | 91-120    | 121-150   | 151-180   | 181-210   | 211-240  | 241-270  | 271-300  |    |
| 0    | 100 ± 83                         | 100 ± 90  | 100 ± 118 | 100 ± 77  | 100 ± 97  | 100 ± 81  | 100 ± 107 | 100 ± 79 | 100 ± 92 | 100 ± 95 | 16 |
| 1    | 65 ± 42                          | 43 ± 33   | 69 ± 35   | 104 ± 82  | 71 ± 77   | 67 ± 68   | 59 ± 80   | 61 ± 70  | 68 ± 67  | 66 ± 70  | 16 |
| 5    | 242 ± 87                         | 241 ± 130 | 338 ± 172 | 261 ± 224 | 103 ± 89  | 99 ± 70   | 48 ± 33   | 58 ± 43  | 46 ± 30  | 63 ± 39  | 16 |
| 10   | 93 ± 52                          | 176 ± 112 | 328 ± 289 | 298 ± 247 | 245 ± 171 | 271 ± 189 | 151 ± 114 | 140 ± 71 | 135 ± 80 | 156 ± 97 | 16 |
| 25   | 23 ± 44                          | 36 ± 49   | 68 ± 84   | 73 ± 95   | 77 ± 92   | 94 ± 105  | 72 ± 87   | 92 ± 93  | 86 ± 85  | 74 ± 80  | 16 |
| 50   | 1 ± 4                            | 1 ± 6     | 0 ± 1     | 0 ± 0     | 0 ± 0     | 0 ± 0     | 0 ± 1     | 0 ± 0    | 0 ± 1    | 0 ± 1    | 16 |

## Mean ± standard deviation

## Normalized percent activity

| [μM] | Time bin (minutes post exposure) |         |         |         |         |         |         |         |         |         |
|------|----------------------------------|---------|---------|---------|---------|---------|---------|---------|---------|---------|
|      | 1-30                             | 31-60   | 61-90   | 91-120  | 121-150 | 151-180 | 181-210 | 211-240 | 241-270 | 271-300 |
| 0    | 58-142                           | 55-145  | 41-159  | 62-138  | 52-148  | 59-141  | 46-154  | 60-140  | 54-146  | 53-147  |
| 1    | 43-86                            | 27-60   | 52-87   | 63-145  | 32-109  | 34-101  | 19-99   | 26-96   | 34-101  | 31-101  |
| 5    | 199-286                          | 176-306 | 252-424 | 149-373 | 59-148  | 65-134  | 31-65   | 37-80   | 31-61   | 44-83   |
| 10   | 67-119                           | 120-232 | 183-472 | 175-422 | 160-330 | 176-365 | 94-208  | 105-176 | 95-175  | 107-204 |
| 25   | 1-45                             | 12-61   | 26-110  | 25-120  | 30-123  | 41-146  | 28-116  | 46-139  | 43-128  | 33-114  |
| 50   | -1-3                             | -1-4    | 0-1     | 0-0     | 0-0     | 0-0     | 0-0     | 0-0     | 0-1     | 0-1     |

## 95% confidence interval

## p-values

| [μM] | Time bin (minutes post exposure) |       |       |        |         |         |         |         |         |         |
|------|----------------------------------|-------|-------|--------|---------|---------|---------|---------|---------|---------|
|      | 1-30                             | 31-60 | 61-90 | 91-120 | 121-150 | 151-180 | 181-210 | 211-240 | 241-270 | 271-300 |
| 1    | 0.891                            | 0.307 | 0.998 | 1.000  | 0.670   | 0.538   | 0.159   | 0.164   | 0.558   | 0.502   |
| 5    | 0.001                            | 0.001 | 0.001 | 0.039  | 1.000   | 1.000   | 0.224   | 0.285   | 0.123   | 0.563   |
| 10   | 0.996                            | 0.035 | 0.001 | 0.001  | 0.001   | 0.002   | 0.319   | 0.716   | 0.741   | 0.474   |
| 25   | 0.001                            | 0.008 | 0.475 | 0.236  | 0.626   | 0.930   | 0.529   | 0.923   | 0.859   | 0.566   |
| 50   | 0.001                            | 0.001 | 0.001 | 0.001  | 0.001   | 0.001   | 0.001   | 0.001   | 0.001   | 0.001   |

Two-way repeated measures ANOVA, Tukey's post-hoc,  $p \leq 0.05$



# CHEMICAL: Formononetin

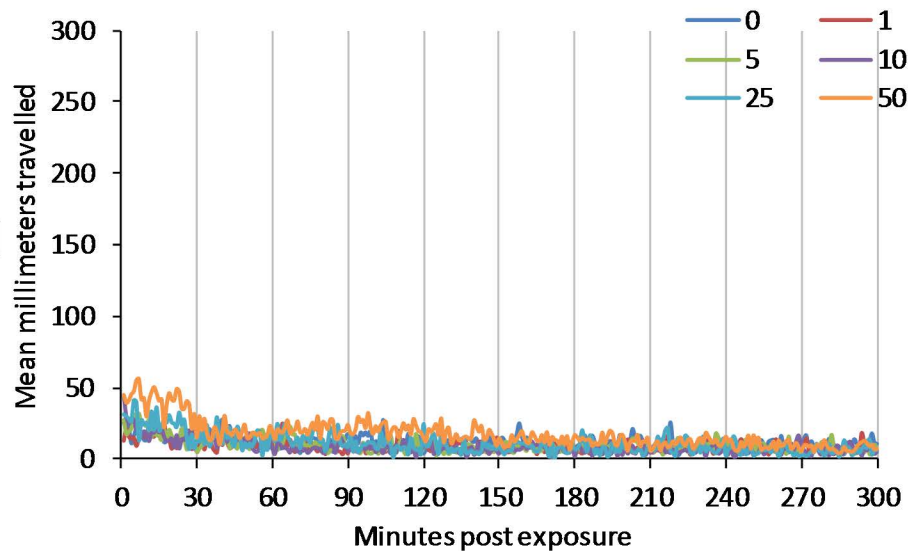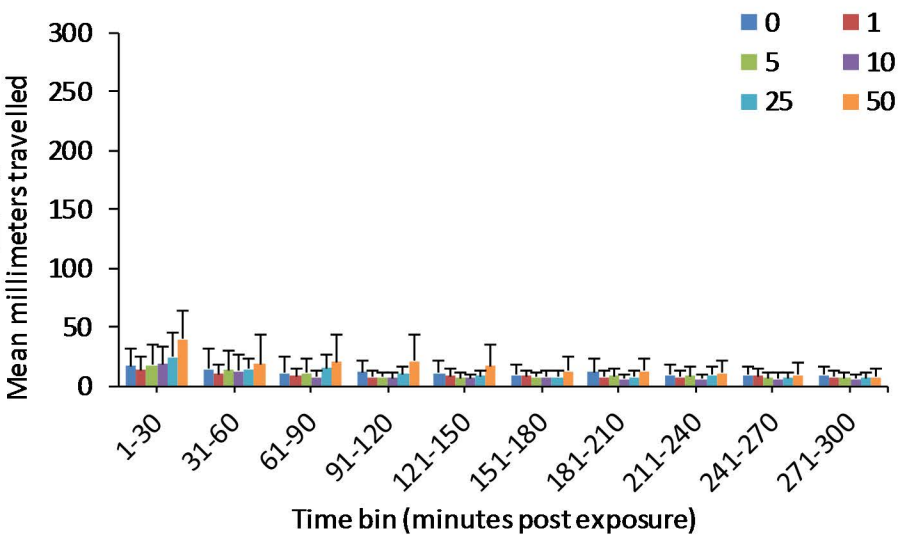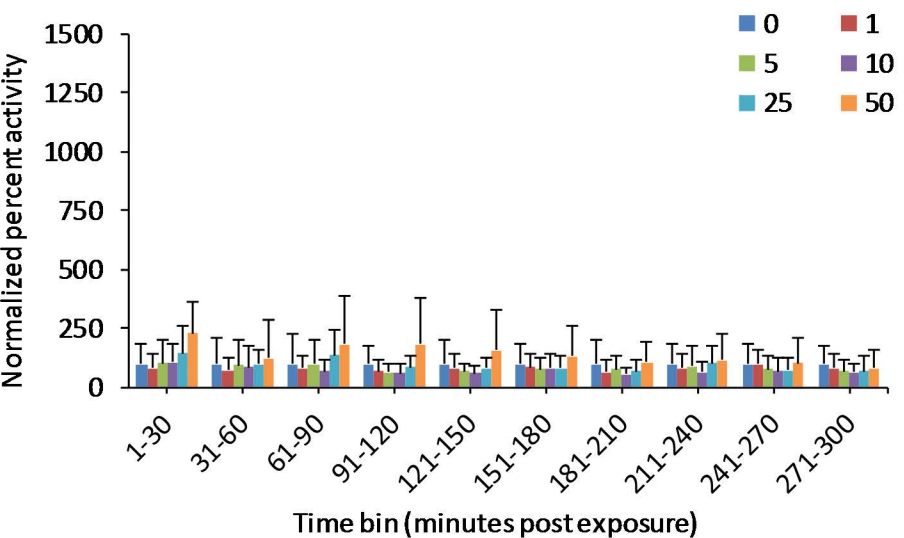

## Normalized percent activity

|            | Time bin (minutes post exposure) |           |           |           |           |           |           |           |           |          |    |
|------------|----------------------------------|-----------|-----------|-----------|-----------|-----------|-----------|-----------|-----------|----------|----|
| [ $\mu$ M] | 1-30                             | 31-60     | 61-90     | 91-120    | 121-150   | 151-180   | 181-210   | 211-240   | 241-270   | 271-300  | N  |
| 0          | 100 ± 81                         | 100 ± 111 | 100 ± 125 | 100 ± 81  | 100 ± 104 | 100 ± 88  | 100 ± 105 | 100 ± 86  | 100 ± 84  | 100 ± 73 | 16 |
| 1          | 80 ± 63                          | 71 ± 52   | 80 ± 55   | 69 ± 45   | 81 ± 63   | 88 ± 52   | 63 ± 51   | 84 ± 63   | 97 ± 64   | 83 ± 60  | 16 |
| 5          | 103 ± 98                         | 93 ± 109  | 100 ± 105 | 65 ± 38   | 68 ± 37   | 78 ± 49   | 76 ± 58   | 89 ± 91   | 79 ± 56   | 71 ± 50  | 16 |
| 10         | 108 ± 81                         | 85 ± 91   | 68 ± 49   | 61 ± 41   | 60 ± 35   | 83 ± 56   | 55 ± 26   | 65 ± 47   | 69 ± 56   | 65 ± 32  | 16 |
| 25         | 144 ± 118                        | 99 ± 58   | 136 ± 112 | 86 ± 48   | 82 ± 44   | 83 ± 49   | 69 ± 45   | 101 ± 77  | 72 ± 52   | 70 ± 63  | 16 |
| 50         | 231 ± 135                        | 124 ± 167 | 185 ± 202 | 181 ± 195 | 158 ± 168 | 134 ± 126 | 107 ± 88  | 117 ± 114 | 103 ± 112 | 82 ± 77  | 16 |

## Mean ± standard deviation

## Normalized percent activity

|            | Time bin (minutes post exposure) |        |        |        |         |         |         |         |         |         |
|------------|----------------------------------|--------|--------|--------|---------|---------|---------|---------|---------|---------|
| [ $\mu$ M] | 1-30                             | 31-60  | 61-90  | 91-120 | 121-150 | 151-180 | 181-210 | 211-240 | 241-270 | 271-300 |
| 0          | 59-141                           | 45-155 | 37-163 | 60-140 | 48-152  | 56-144  | 47-153  | 57-143  | 58-142  | 63-137  |
| 1          | 48-112                           | 45-98  | 52-107 | 46-92  | 50-113  | 62-114  | 37-89   | 52-115  | 65-130  | 53-113  |
| 5          | 55-152                           | 38-147 | 47-152 | 46-84  | 49-86   | 54-103  | 47-106  | 44-134  | 51-107  | 46-96   |
| 10         | 68-149                           | 40-131 | 44-93  | 41-82  | 43-78   | 55-112  | 42-68   | 42-88   | 41-98   | 49-82   |
| 25         | 85-203                           | 70-128 | 80-192 | 62-111 | 60-104  | 59-108  | 47-91   | 63-139  | 46-98   | 38-101  |
| 50         | 164-299                          | 40-207 | 84-286 | 84-279 | 74-242  | 71-197  | 63-151  | 60-174  | 47-159  | 44-121  |

## 95% confidence interval

## p-values

|            | Time bin (minutes post exposure) |       |       |        |         |         |         |         |         |         |
|------------|----------------------------------|-------|-------|--------|---------|---------|---------|---------|---------|---------|
| [ $\mu$ M] | 1-30                             | 31-60 | 61-90 | 91-120 | 121-150 | 151-180 | 181-210 | 211-240 | 241-270 | 271-300 |
| 1          | 0.959                            | 1.000 | 1.000 | 0.957  | 1.000   | 1.000   | 0.970   | 1.000   | 1.000   | 0.996   |
| 5          | 1.000                            | 1.000 | 0.995 | 0.968  | 1.000   | 0.999   | 1.000   | 1.000   | 1.000   | 0.868   |
| 10         | 0.989                            | 1.000 | 1.000 | 0.889  | 0.994   | 1.000   | 0.992   | 0.989   | 0.957   | 0.946   |
| 25         | 0.494                            | 0.818 | 0.329 | 1.000  | 0.996   | 1.000   | 1.000   | 0.979   | 0.979   | 0.897   |
| 50         | 0.003                            | 0.943 | 0.031 | 0.213  | 0.336   | 0.933   | 0.904   | 0.917   | 1.000   | 0.943   |

## Two-way repeated measures ANOVA, Tukey's post-hoc, $p \leq 0.05$

# CHEMICAL: Galangin

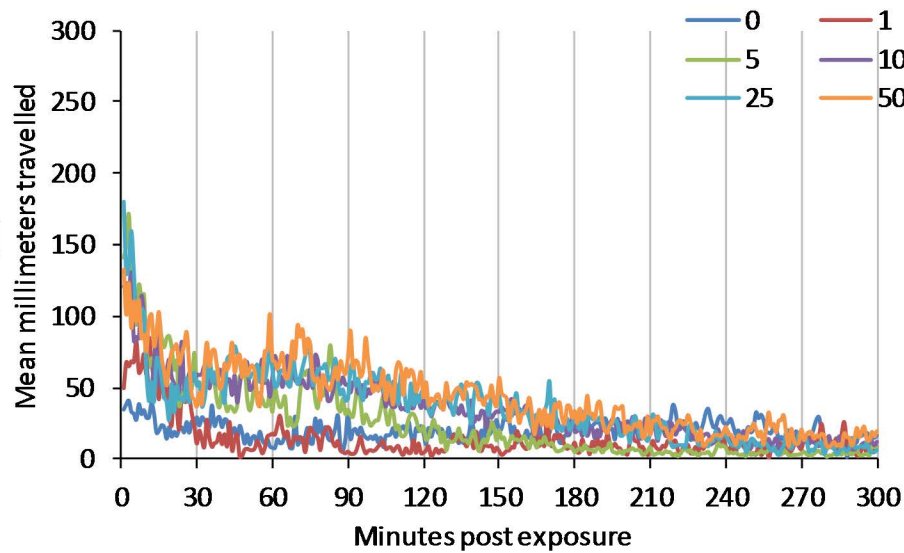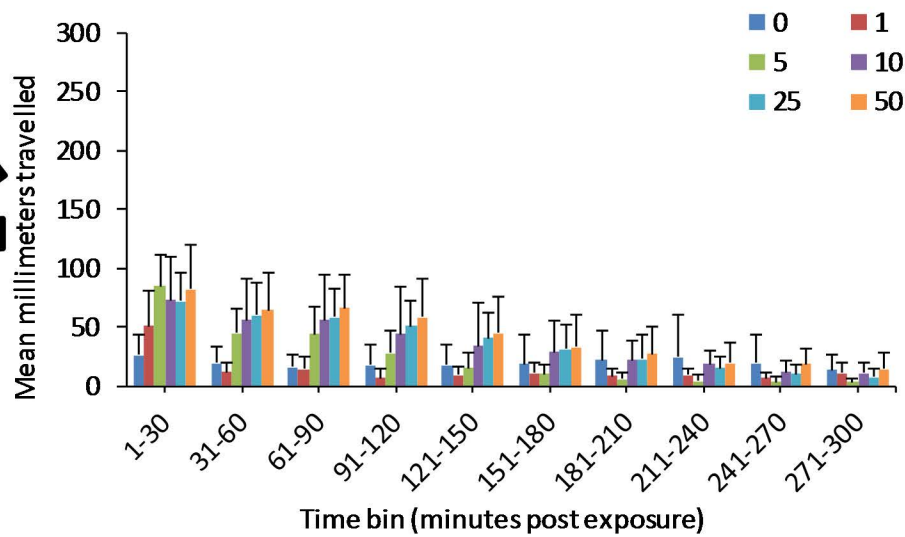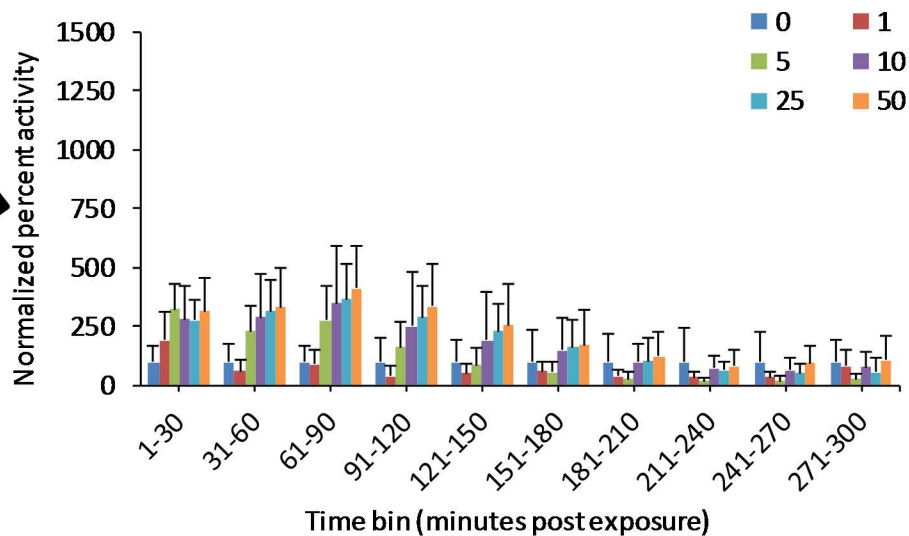

## Normalized percent activity

| [μM] | Time bin (minutes post exposure) |           |           |           |           |           |           |           |           |           | N  |
|------|----------------------------------|-----------|-----------|-----------|-----------|-----------|-----------|-----------|-----------|-----------|----|
|      | 1-30                             | 31-60     | 61-90     | 91-120    | 121-150   | 151-180   | 181-210   | 211-240   | 241-270   | 271-300   |    |
| 0    | 100 ± 68                         | 100 ± 78  | 100 ± 68  | 100 ± 101 | 100 ± 96  | 100 ± 132 | 100 ± 116 | 100 ± 147 | 100 ± 127 | 100 ± 93  | 16 |
| 1    | 193 ± 116                        | 61 ± 45   | 90 ± 63   | 40 ± 43   | 52 ± 43   | 59 ± 44   | 40 ± 24   | 37 ± 23   | 36 ± 22   | 81 ± 68   | 16 |
| 5    | 324 ± 105                        | 232 ± 105 | 274 ± 146 | 161 ± 109 | 85 ± 71   | 54 ± 43   | 26 ± 29   | 17 ± 19   | 19 ± 20   | 26 ± 26   | 16 |
| 10   | 279 ± 142                        | 289 ± 180 | 349 ± 241 | 250 ± 230 | 192 ± 203 | 151 ± 138 | 99 ± 78   | 74 ± 50   | 63 ± 50   | 78 ± 69   | 16 |
| 25   | 276 ± 89                         | 314 ± 138 | 367 ± 150 | 291 ± 128 | 229 ± 119 | 164 ± 115 | 104 ± 96  | 63 ± 40   | 52 ± 39   | 58 ± 56   | 16 |
| 50   | 314 ± 143                        | 333 ± 165 | 410 ± 183 | 334 ± 184 | 253 ± 176 | 172 ± 147 | 124 ± 105 | 80 ± 69   | 94 ± 73   | 107 ± 103 | 16 |

## Mean ± standard deviation

## Normalized percent activity

| [μM] | Time bin (minutes post exposure) |         |         |         |         |         |         |         |         |         |
|------|----------------------------------|---------|---------|---------|---------|---------|---------|---------|---------|---------|
|      | 1-30                             | 31-60   | 61-90   | 91-120  | 121-150 | 151-180 | 181-210 | 211-240 | 241-270 | 271-300 |
| 0    | 66-134                           | 61-139  | 66-134  | 50-150  | 52-148  | 34-166  | 42-158  | 27-173  | 37-163  | 54-146  |
| 1    | 135-251                          | 38-83   | 59-122  | 19-62   | 31-74   | 37-81   | 28-52   | 25-49   | 25-47   | 47-115  |
| 5    | 271-376                          | 179-284 | 202-347 | 107-215 | 49-120  | 32-76   | 11-40   | 8-27    | 9-29    | 13-39   |
| 10   | 207-350                          | 199-379 | 229-470 | 135-365 | 90-293  | 82-220  | 60-138  | 49-100  | 38-89   | 44-112  |
| 25   | 231-320                          | 245-383 | 292-442 | 227-355 | 170-289 | 106-221 | 55-152  | 43-83   | 33-72   | 30-86   |
| 50   | 243-386                          | 250-415 | 319-502 | 242-425 | 165-341 | 98-245  | 72-177  | 46-114  | 57-131  | 55-168  |

## 95% confidence interval

## p-values

| [μM] | Time bin (minutes post exposure) |       |       |        |         |         |         |         |         |         |
|------|----------------------------------|-------|-------|--------|---------|---------|---------|---------|---------|---------|
|      | 1-30                             | 31-60 | 61-90 | 91-120 | 121-150 | 151-180 | 181-210 | 211-240 | 241-270 | 271-300 |
| 1    | 0.060                            | 0.587 | 0.990 | 0.052  | 0.364   | 0.826   | 0.167   | 0.323   | 0.111   | 0.999   |
| 5    | 0.001                            | 0.001 | 0.001 | 0.244  | 0.870   | 0.606   | 0.001   | 0.001   | 0.001   | 0.004   |
| 10   | 0.001                            | 0.001 | 0.001 | 0.002  | 0.233   | 0.517   | 1.000   | 1.000   | 0.744   | 0.960   |
| 25   | 0.001                            | 0.001 | 0.001 | 0.001  | 0.002   | 0.080   | 0.997   | 0.998   | 0.641   | 0.432   |
| 50   | 0.001                            | 0.001 | 0.001 | 0.001  | 0.001   | 0.204   | 0.913   | 1.000   | 1.000   | 1.000   |

Two-way repeated measures ANOVA, Tukey's post-hoc, p ≤ 0.05

# CHEMICAL: Genistein

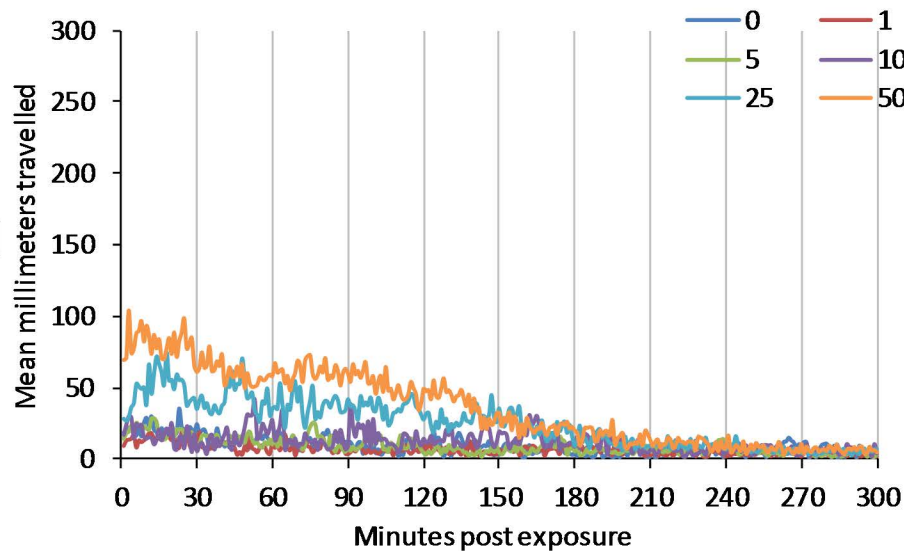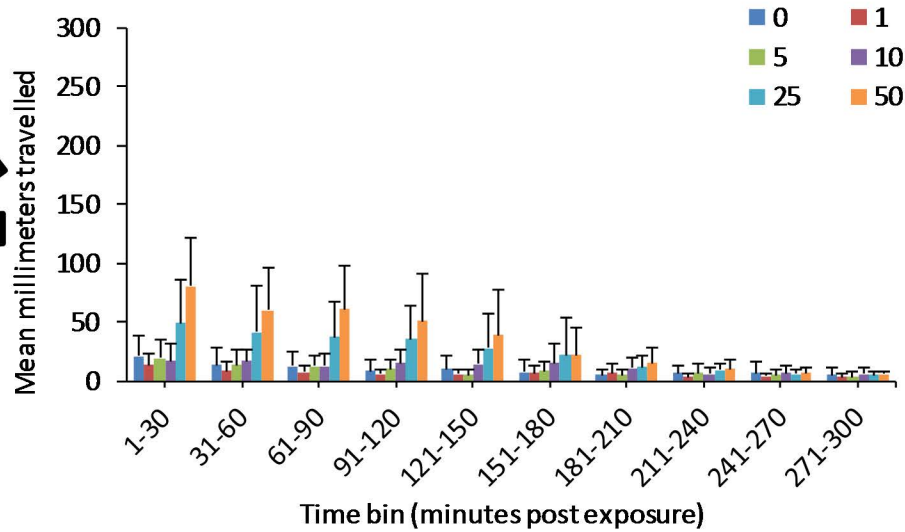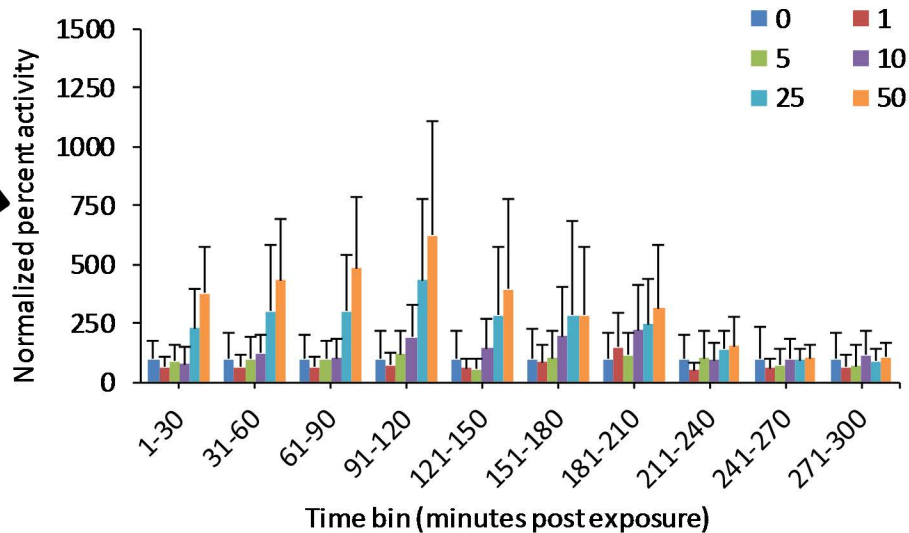

## Normalized percent activity

| [μM] | Time bin (minutes post exposure) |           |           |           |           |           |           |           |           |           | N  |
|------|----------------------------------|-----------|-----------|-----------|-----------|-----------|-----------|-----------|-----------|-----------|----|
|      | 1-30                             | 31-60     | 61-90     | 91-120    | 121-150   | 151-180   | 181-210   | 211-240   | 241-270   | 271-300   |    |
| 0    | 100 ± 80                         | 100 ± 107 | 100 ± 100 | 100 ± 120 | 100 ± 122 | 100 ± 131 | 100 ± 114 | 100 ± 104 | 100 ± 135 | 100 ± 114 | 16 |
| 1    | 63 ± 49                          | 63 ± 53   | 63 ± 44   | 73 ± 51   | 59 ± 44   | 86 ± 76   | 149 ± 151 | 53 ± 33   | 59 ± 38   | 64 ± 51   | 16 |
| 5    | 91 ± 69                          | 97 ± 99   | 99 ± 80   | 120 ± 99  | 55 ± 48   | 104 ± 117 | 115 ± 95  | 103 ± 116 | 72 ± 73   | 69 ± 94   | 16 |
| 10   | 78 ± 70                          | 124 ± 75  | 103 ± 79  | 190 ± 138 | 145 ± 124 | 196 ± 211 | 223 ± 187 | 94 ± 78   | 99 ± 89   | 115 ± 106 | 16 |
| 25   | 228 ± 171                        | 304 ± 279 | 301 ± 242 | 431 ± 345 | 283 ± 291 | 286 ± 399 | 245 ± 197 | 140 ± 77  | 92 ± 54   | 90 ± 57   | 16 |
| 50   | 376 ± 195                        | 434 ± 259 | 484 ± 301 | 621 ± 486 | 395 ± 383 | 285 ± 287 | 313 ± 269 | 152 ± 125 | 102 ± 61  | 109 ± 59  | 16 |

## Mean ± standard deviation

## Normalized percent activity

| [μM] | Time bin (minutes post exposure) |         |         |         |         |         |         |         |         |         |
|------|----------------------------------|---------|---------|---------|---------|---------|---------|---------|---------|---------|
|      | 1-30                             | 31-60   | 61-90   | 91-120  | 121-150 | 151-180 | 181-210 | 211-240 | 241-270 | 271-300 |
| 0    | 60-140                           | 47-153  | 50-150  | 40-160  | 39-161  | 34-166  | 43-157  | 48-152  | 33-167  | 43-157  |
| 1    | 39-88                            | 36-89   | 41-85   | 47-99   | 37-81   | 48-124  | 73-224  | 37-70   | 40-78   | 39-90   |
| 5    | 57-126                           | 48-147  | 59-139  | 71-170  | 31-79   | 46-162  | 67-162  | 45-161  | 36-109  | 22-116  |
| 10   | 43-113                           | 87-162  | 64-142  | 121-259 | 83-207  | 91-302  | 129-316 | 55-133  | 55-144  | 62-168  |
| 25   | 142-313                          | 164-443 | 180-422 | 258-603 | 138-429 | 87-486  | 147-343 | 102-179 | 66-119  | 61-118  |
| 50   | 279-473                          | 304-564 | 334-635 | 378-865 | 203-587 | 142-429 | 179-448 | 89-215  | 72-133  | 79-138  |

## 95% confidence interval

## p-values

| [μM] | Time bin (minutes post exposure) |       |       |        |         |         |         |         |         |         |
|------|----------------------------------|-------|-------|--------|---------|---------|---------|---------|---------|---------|
|      | 1-30                             | 31-60 | 61-90 | 91-120 | 121-150 | 151-180 | 181-210 | 211-240 | 241-270 | 271-300 |
| 1    | 0.941                            | 0.977 | 0.982 | 1.000  | 0.991   | 1.000   | 0.831   | 0.847   | 0.999   | 0.961   |
| 5    | 1.000                            | 1.000 | 1.000 | 0.816  | 0.874   | 1.000   | 0.980   | 0.999   | 0.999   | 0.657   |
| 10   | 0.983                            | 0.527 | 1.000 | 0.021  | 0.463   | 0.126   | 0.322   | 1.000   | 0.998   | 1.000   |
| 25   | 0.046                            | 0.010 | 0.004 | 0.001  | 0.003   | 0.007   | 0.023   | 0.356   | 0.849   | 1.000   |
| 50   | 0.001                            | 0.001 | 0.001 | 0.001  | 0.001   | 0.003   | 0.002   | 0.561   | 0.789   | 0.948   |

Two-way repeated measures ANOVA, Tukey's post-hoc,  $p \leq 0.05$

# CHEMICAL: Kaempferol

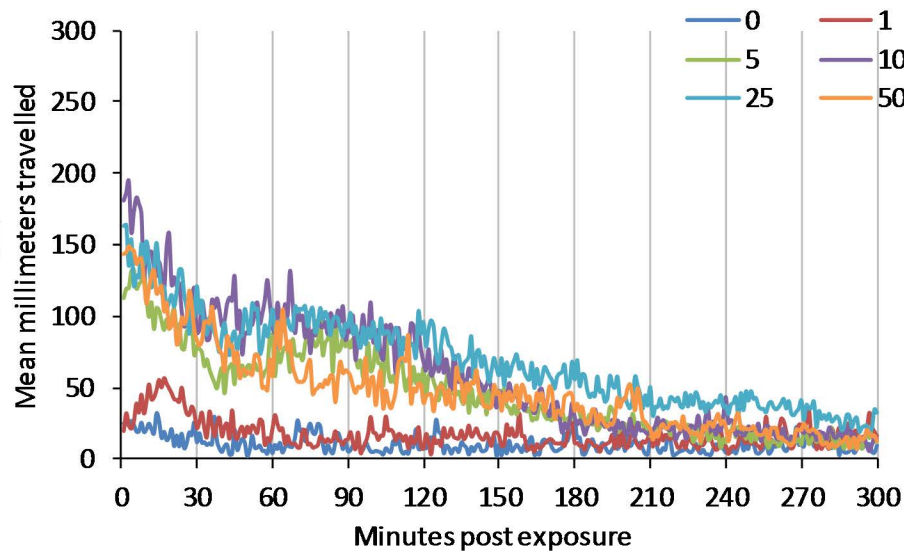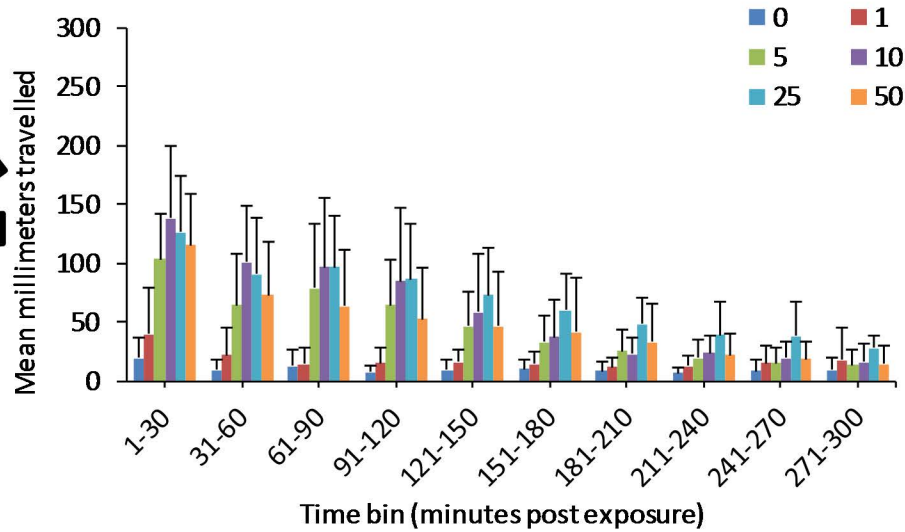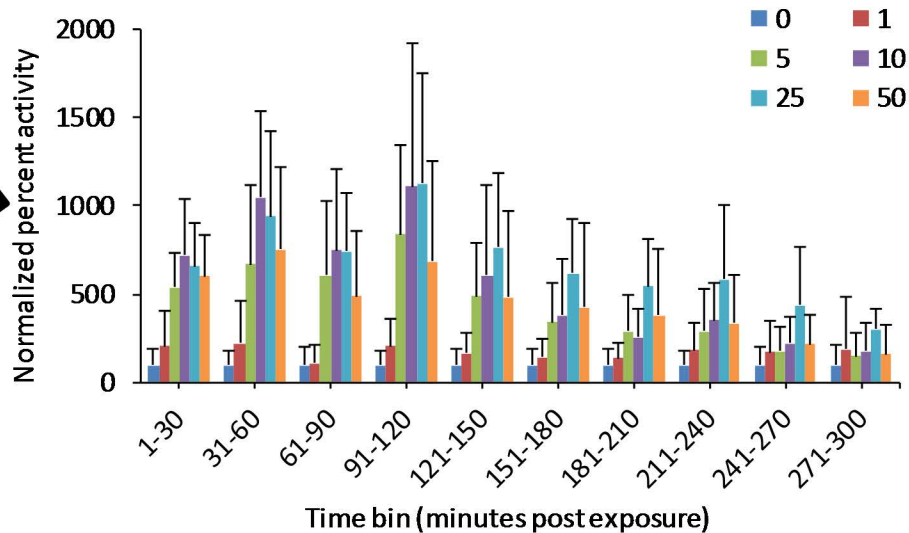

## Normalized percent activity

| [μM] | Time bin (minutes post exposure) |            |           |            |           |           |           |           |           |           | N  |
|------|----------------------------------|------------|-----------|------------|-----------|-----------|-----------|-----------|-----------|-----------|----|
|      | 1-30                             | 31-60      | 61-90     | 91-120     | 121-150   | 151-180   | 181-210   | 211-240   | 241-270   | 271-300   |    |
| 0    | 100 ± 93                         | 100 ± 84   | 100 ± 100 | 100 ± 77   | 100 ± 87  | 100 ± 92  | 100 ± 85  | 100 ± 78  | 100 ± 104 | 100 ± 116 | 16 |
| 1    | 206 ± 202                        | 224 ± 238  | 111 ± 102 | 204 ± 160  | 166 ± 120 | 145 ± 104 | 137 ± 92  | 184 ± 148 | 172 ± 180 | 190 ± 289 | 16 |
| 5    | 536 ± 200                        | 665 ± 448  | 604 ± 420 | 839 ± 509  | 486 ± 299 | 341 ± 220 | 291 ± 202 | 287 ± 237 | 175 ± 143 | 149 ± 130 | 16 |
| 10   | 719 ± 318                        | 1047 ± 487 | 746 ± 456 | 1105 ± 812 | 608 ± 514 | 381 ± 320 | 258 ± 156 | 349 ± 219 | 219 ± 157 | 175 ± 163 | 16 |
| 25   | 657 ± 245                        | 938 ± 487  | 742 ± 333 | 123 ± 624  | 763 ± 421 | 615 ± 310 | 543 ± 267 | 584 ± 419 | 436 ± 333 | 302 ± 115 | 16 |
| 50   | 600 ± 229                        | 752 ± 466  | 489 ± 368 | 686 ± 566  | 482 ± 491 | 423 ± 476 | 378 ± 373 | 334 ± 272 | 217 ± 160 | 157 ± 166 | 16 |

## Mean ± standard deviation

## Normalized percent activity

| [μM] | Time bin (minutes post exposure) |          |         |          |         |         |         |         |         |         |
|------|----------------------------------|----------|---------|----------|---------|---------|---------|---------|---------|---------|
|      | 1-30                             | 31-60    | 61-90   | 91-120   | 121-150 | 151-180 | 181-210 | 211-240 | 241-270 | 271-300 |
| 0    | 54-146                           | 58-142   | 50-150  | 62-138   | 56-144  | 54-146  | 57-143  | 61-139  | 48-152  | 42-158  |
| 1    | 104-307                          | 105-343  | 60-162  | 124-284  | 106-226 | 93-197  | 91-183  | 110-258 | 82-262  | 46-334  |
| 5    | 436-635                          | 441-889  | 394-814 | 585-1093 | 336-635 | 231-451 | 190-391 | 169-406 | 103-246 | 84-214  |
| 10   | 560-878                          | 804-1291 | 518-974 | 699-1511 | 351-865 | 221-541 | 180-336 | 240-459 | 141-297 | 93-256  |
| 25   | 535-780                          | 695-1182 | 576-909 | 811-1434 | 552-973 | 460-770 | 409-676 | 375-794 | 270-603 | 244-359 |
| 50   | 486-714                          | 519-985  | 305-673 | 403-969  | 237-727 | 185-662 | 191-564 | 198-470 | 137-297 | 74-240  |

## 95% confidence interval

## p-values

| [μM] | Time bin (minutes post exposure) |       |       |        |         |         |         |         |         |         |
|------|----------------------------------|-------|-------|--------|---------|---------|---------|---------|---------|---------|
|      | 1-30                             | 31-60 | 61-90 | 91-120 | 121-150 | 151-180 | 181-210 | 211-240 | 241-270 | 271-300 |
| 1    | 0.070                            | 0.084 | 0.990 | 0.213  | 0.489   | 0.740   | 0.916   | 0.434   | 0.596   | 0.709   |
| 5    | 0.001                            | 0.001 | 0.001 | 0.001  | 0.001   | 0.001   | 0.004   | 0.009   | 0.318   | 0.855   |
| 10   | 0.001                            | 0.001 | 0.001 | 0.001  | 0.001   | 0.001   | 0.013   | 0.001   | 0.024   | 0.320   |
| 25   | 0.001                            | 0.001 | 0.001 | 0.001  | 0.001   | 0.001   | 0.001   | 0.001   | 0.001   | 0.001   |
| 50   | 0.001                            | 0.001 | 0.001 | 0.001  | 0.001   | 0.001   | 0.002   | 0.002   | 0.055   | 0.632   |

Two-way repeated measures ANOVA, Tukey's post-hoc,  $p \leq 0.05$

# CHEMICAL: Luteolin

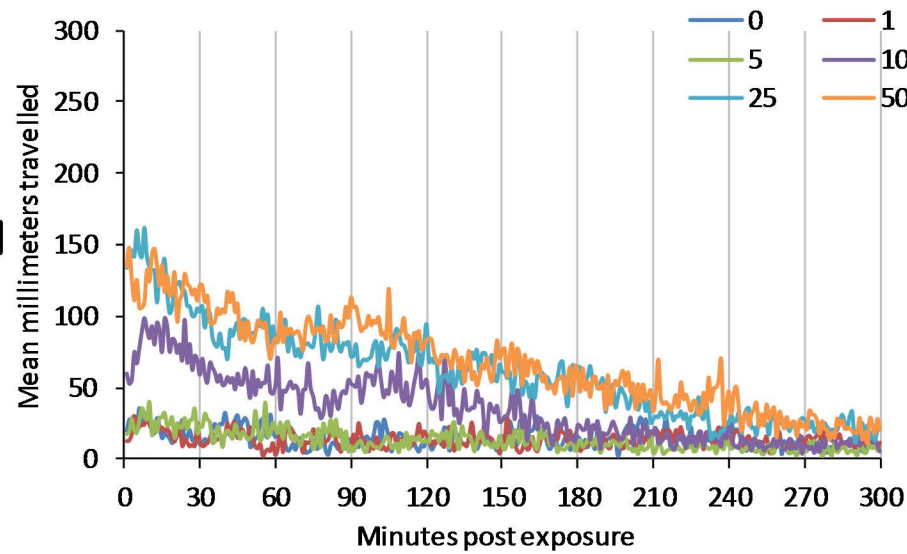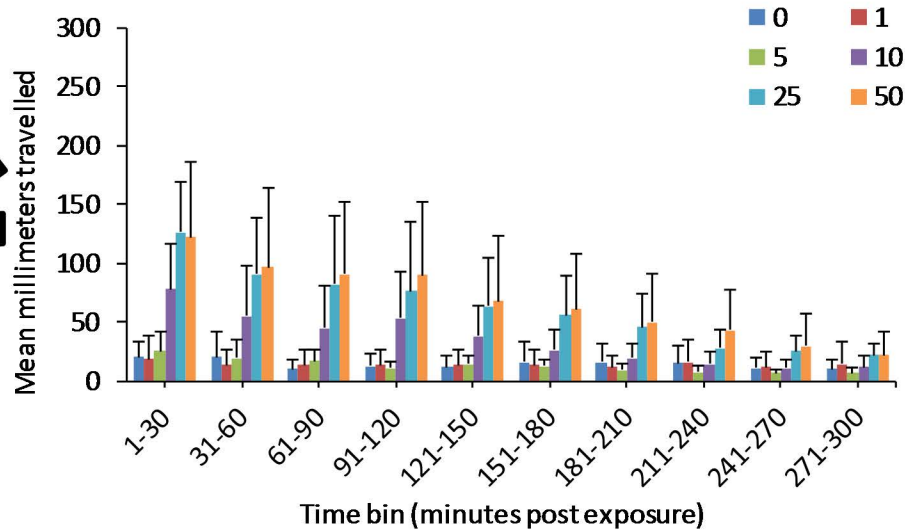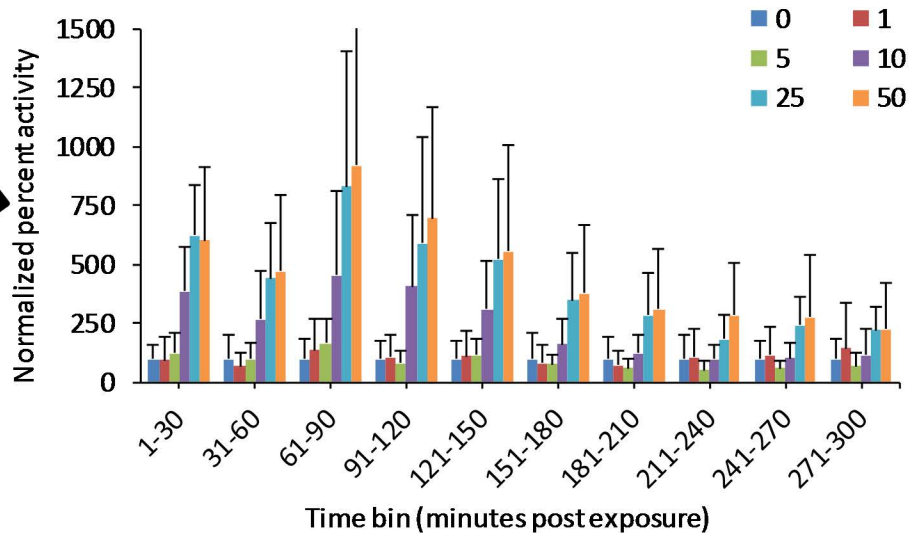

## Normalized percent activity

| [μM] | Time bin (minutes post exposure) |           |           |           |           |           |           |           |           |           | N  |
|------|----------------------------------|-----------|-----------|-----------|-----------|-----------|-----------|-----------|-----------|-----------|----|
|      | 1-30                             | 31-60     | 61-90     | 91-120    | 121-150   | 151-180   | 181-210   | 211-240   | 241-270   | 271-300   |    |
| 0    | 100 ± 63                         | 100 ± 106 | 100 ± 87  | 100 ± 81  | 100 ± 77  | 100 ± 108 | 100 ± 95  | 100 ± 100 | 100 ± 80  | 100 ± 82  | 16 |
| 1    | 92 ± 99                          | 68 ± 61   | 137 ± 131 | 105 ± 100 | 109 ± 111 | 83 ± 80   | 74 ± 58   | 107 ± 123 | 115 ± 124 | 143 ± 198 | 16 |
| 5    | 125 ± 84                         | 96 ± 76   | 167 ± 106 | 82 ± 50   | 117 ± 65  | 77 ± 39   | 61 ± 36   | 51 ± 38   | 61 ± 34   | 70 ± 52   | 16 |
| 10   | 384 ± 191                        | 269 ± 204 | 455 ± 357 | 408 ± 299 | 312 ± 207 | 161 ± 107 | 122 ± 77  | 96 ± 65   | 101 ± 64  | 117 ± 109 | 16 |
| 25   | 623 ± 215                        | 441 ± 232 | 831 ± 577 | 588 ± 450 | 521 ± 344 | 347 ± 205 | 286 ± 182 | 181 ± 104 | 241 ± 123 | 219 ± 104 | 16 |
| 50   | 603 ± 314                        | 472 ± 324 | 918 ± 612 | 693 ± 476 | 558 ± 447 | 378 ± 293 | 311 ± 258 | 284 ± 219 | 275 ± 266 | 226 ± 193 | 16 |

## Mean ± standard deviation

## Normalized percent activity

| [μM] | Time bin (minutes post exposure) |         |          |         |         |         |         |         |         |         |
|------|----------------------------------|---------|----------|---------|---------|---------|---------|---------|---------|---------|
|      | 1-30                             | 31-60   | 61-90    | 91-120  | 121-150 | 151-180 | 181-210 | 211-240 | 241-270 | 271-300 |
| 0    | 68-132                           | 47-153  | 57-143   | 60-140  | 61-139  | 46-154  | 53-147  | 50-150  | 60-140  | 59-141  |
| 1    | 43-142                           | 37-99   | 72-203   | 55-155  | 53-165  | 43-123  | 45-103  | 46-169  | 53-177  | 44-243  |
| 5    | 83-167                           | 58-134  | 114-220  | 57-107  | 84-149  | 57-96   | 43-79   | 32-70   | 44-78   | 43-96   |
| 10   | 289-480                          | 167-372 | 277-634  | 259-558 | 208-415 | 107-215 | 84-161  | 64-129  | 69-132  | 63-171  |
| 25   | 515-730                          | 325-557 | 543-1119 | 363-813 | 348-693 | 245-449 | 195-377 | 129-233 | 179-303 | 168-271 |
| 50   | 446-760                          | 310-634 | 612-1224 | 456-931 | 334-781 | 231-524 | 182-440 | 175-394 | 142-408 | 130-323 |

## 95% confidence interval

## p-values

| [μM] | Time bin (minutes post exposure) |       |       |        |         |         |         |         |         |         |
|------|----------------------------------|-------|-------|--------|---------|---------|---------|---------|---------|---------|
|      | 1-30                             | 31-60 | 61-90 | 91-120 | 121-150 | 151-180 | 181-210 | 211-240 | 241-270 | 271-300 |
| 1    | 0.937                            | 0.991 | 0.917 | 1.000  | 1.000   | 0.998   | 0.999   | 1.000   | 0.999   | 1.000   |
| 5    | 0.763                            | 0.940 | 0.205 | 1.000  | 0.905   | 0.999   | 0.978   | 0.764   | 0.986   | 0.936   |
| 10   | 0.001                            | 0.001 | 0.001 | 0.001  | 0.001   | 0.096   | 0.531   | 0.988   | 0.993   | 0.996   |
| 25   | 0.001                            | 0.001 | 0.001 | 0.001  | 0.001   | 0.001   | 0.001   | 0.035   | 0.002   | 0.026   |
| 50   | 0.001                            | 0.001 | 0.001 | 0.001  | 0.001   | 0.001   | 0.001   | 0.001   | 0.002   | 0.087   |

Two-way repeated measures ANOVA, Tukey's post-hoc,  $p \leq 0.05$

**CHEMICAL: Morin**

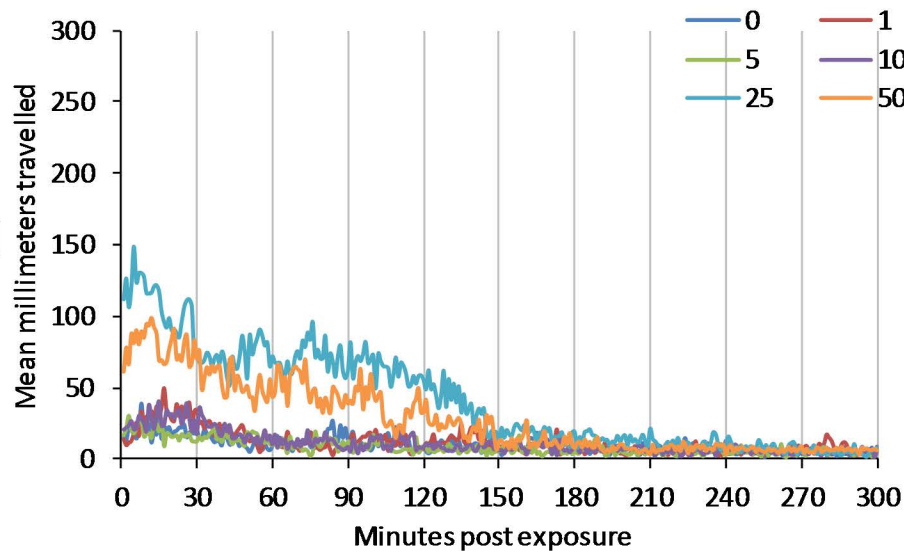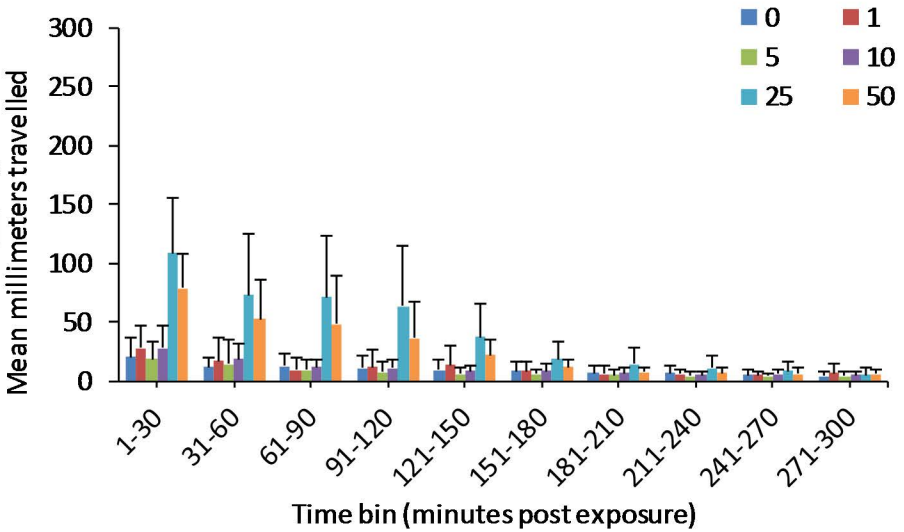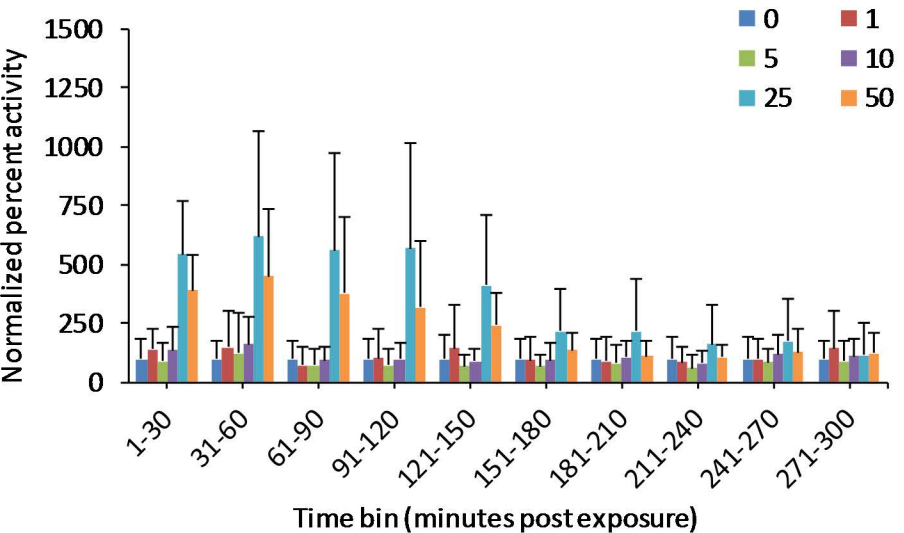

**Normalized percent activity**

| [μM] | Time bin (minutes post exposure) |           |           |           |           |           |           |           |           |           | N  |
|------|----------------------------------|-----------|-----------|-----------|-----------|-----------|-----------|-----------|-----------|-----------|----|
|      | 1-30                             | 31-60     | 61-90     | 91-120    | 121-150   | 151-180   | 181-210   | 211-240   | 241-270   | 271-300   |    |
| 0    | 100 ± 83                         | 100 ± 75  | 100 ± 81  | 100 ± 88  | 100 ± 101 | 100 ± 89  | 100 ± 86  | 100 ± 90  | 100 ± 91  | 100 ± 74  | 16 |
| 1    | 141 ± 90                         | 147 ± 160 | 74 ± 78   | 103 ± 126 | 147 ± 179 | 94 ± 103  | 89 ± 103  | 86 ± 63   | 99 ± 87   | 145 ± 160 | 16 |
| 5    | 92 ± 76                          | 123 ± 173 | 75 ± 64   | 71 ± 72   | 67 ± 50   | 67 ± 52   | 80 ± 76   | 62 ± 56   | 86 ± 56   | 92 ± 81   | 16 |
| 10   | 138 ± 98                         | 160 ± 117 | 92 ± 58   | 100 ± 66  | 92 ± 51   | 96 ± 70   | 106 ± 74  | 81 ± 51   | 120 ± 84  | 112 ± 73  | 16 |
| 25   | 543 ± 231                        | 617 ± 449 | 558 ± 445 | 567 ± 445 | 411 ± 301 | 215 ± 179 | 218 ± 222 | 160 ± 170 | 175 ± 181 | 115 ± 137 | 16 |
| 50   | 392 ± 145                        | 451 ± 283 | 379 ± 323 | 320 ± 278 | 240 ± 138 | 135 ± 76  | 110 ± 69  | 107 ± 56  | 127 ± 101 | 122 ± 85  | 16 |

**Mean ± standard deviation**

**Normalized percent activity**

| [μM] | Time bin (minutes post exposure) |         |         |         |         |         |         |         |         |         |
|------|----------------------------------|---------|---------|---------|---------|---------|---------|---------|---------|---------|
|      | 1-30                             | 31-60   | 61-90   | 91-120  | 121-150 | 151-180 | 181-210 | 211-240 | 241-270 | 271-300 |
| 0    | 58-142                           | 62-138  | 60-140  | 56-144  | 49-151  | 56-144  | 57-143  | 55-145  | 55-145  | 63-137  |
| 1    | 96-186                           | 67-227  | 35-113  | 40-166  | 57-236  | 43-145  | 38-141  | 54-118  | 56-143  | 65-225  |
| 5    | 54-130                           | 37-210  | 43-107  | 35-107  | 43-92   | 41-93   | 42-118  | 34-90   | 58-114  | 51-132  |
| 10   | 89-187                           | 102-219 | 63-121  | 67-133  | 66-117  | 60-131  | 69-143  | 55-106  | 78-162  | 75-149  |
| 25   | 427-658                          | 393-842 | 351-766 | 344-789 | 261-562 | 126-305 | 108-329 | 75-245  | 85-265  | 47-184  |
| 50   | 320-465                          | 309-592 | 217-540 | 181-459 | 171-310 | 97-173  | 75-144  | 78-135  | 77-178  | 79-164  |

**95% confidence interval**

**p-values**

| [μM] | Time bin (minutes post exposure) |       |       |        |         |         |         |         |         |         |
|------|----------------------------------|-------|-------|--------|---------|---------|---------|---------|---------|---------|
|      | 1-30                             | 31-60 | 61-90 | 91-120 | 121-150 | 151-180 | 181-210 | 211-240 | 241-270 | 271-300 |
| 1    | 0.640                            | 1.000 | 0.826 | 1.000  | 0.888   | 0.998   | 1.000   | 1.000   | 1.000   | 0.999   |
| 5    | 1.000                            | 1.000 | 0.889 | 0.913  | 1.000   | 0.919   | 0.979   | 0.873   | 1.000   | 0.993   |
| 10   | 0.725                            | 0.603 | 1.000 | 0.989  | 0.925   | 1.000   | 0.992   | 1.000   | 0.945   | 0.992   |
| 25   | 0.001                            | 0.001 | 0.001 | 0.002  | 0.002   | 0.693   | 0.934   | 0.914   | 0.970   | 0.992   |
| 50   | 0.001                            | 0.001 | 0.001 | 0.001  | 0.001   | 0.656   | 0.418   | 0.950   | 0.942   | 0.996   |

**Two-way repeated measures ANOVA, Tukey's post-hoc, p ≤ 0.05**

# CHEMICAL: Myricetin

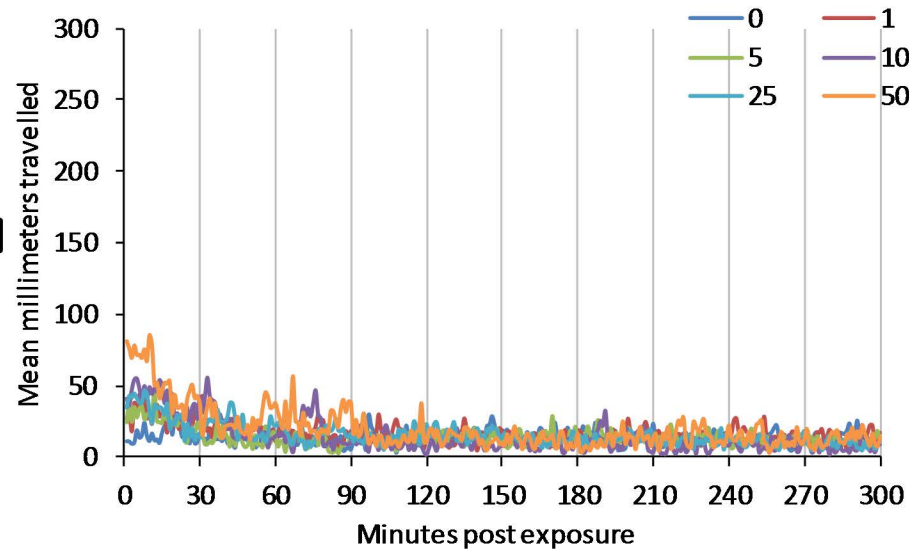

| Normalized percent activity |           | Time bin (minutes post exposure) |           |          |          |          |          |           |           |          |    |
|-----------------------------|-----------|----------------------------------|-----------|----------|----------|----------|----------|-----------|-----------|----------|----|
| [ $\mu\text{M}$ ]           | 1-30      | 31-60                            | 61-90     | 91-120   | 121-150  | 151-180  | 181-210  | 211-240   | 241-270   | 271-300  | N  |
| 0                           | 100 ± 76  | 100 ± 66                         | 100 ± 78  | 100 ± 62 | 100 ± 82 | 100 ± 83 | 100 ± 82 | 100 ± 76  | 100 ± 78  | 100 ± 70 | 16 |
| 1                           | 169 ± 85  | 151 ± 129                        | 125 ± 124 | 119 ± 76 | 85 ± 62  | 82 ± 57  | 99 ± 86  | 96 ± 69   | 124 ± 95  | 99 ± 71  | 16 |
| 5                           | 152 ± 130 | 94 ± 59                          | 74 ± 45   | 93 ± 41  | 85 ± 75  | 83 ± 66  | 95 ± 90  | 84 ± 74   | 98 ± 102  | 81 ± 63  | 16 |
| 10                          | 240 ± 222 | 172 ± 162                        | 139 ± 157 | 80 ± 94  | 55 ± 37  | 62 ± 49  | 84 ± 104 | 52 ± 40   | 78 ± 74   | 52 ± 39  | 16 |
| 25                          | 173 ± 122 | 162 ± 139                        | 123 ± 139 | 98 ± 86  | 95 ± 83  | 78 ± 67  | 83 ± 64  | 74 ± 51   | 86 ± 62   | 59 ± 34  | 16 |
| 50                          | 319 ± 169 | 193 ± 195                        | 206 ± 187 | 104 ± 72 | 80 ± 99  | 74 ± 99  | 73 ± 77  | 101 ± 144 | 100 ± 109 | 87 ± 117 | 16 |

Mean ± standard deviation

| Normalized percent activity |         | Time bin (minutes post exposure) |         |        |         |         |         |         |         |         |  |
|-----------------------------|---------|----------------------------------|---------|--------|---------|---------|---------|---------|---------|---------|--|
| [ $\mu\text{M}$ ]           | 1-30    | 31-60                            | 61-90   | 91-120 | 121-150 | 151-180 | 181-210 | 211-240 | 241-270 | 271-300 |  |
| 0                           | 62-138  | 67-133                           | 61-139  | 69-131 | 59-141  | 59-141  | 59-141  | 62-138  | 61-139  | 65-135  |  |
| 1                           | 127-212 | 86-216                           | 63-187  | 81-157 | 54-116  | 54-110  | 56-142  | 62-131  | 76-171  | 64-135  |  |
| 5                           | 88-217  | 65-124                           | 51-96   | 72-114 | 47-122  | 50-117  | 50-139  | 47-122  | 48-149  | 50-113  |  |
| 10                          | 129-350 | 91-254                           | 60-217  | 33-127 | 36-74   | 38-87   | 32-136  | 32-72   | 41-115  | 33-72   |  |
| 25                          | 113-234 | 92-231                           | 54-193  | 55-142 | 53-137  | 44-112  | 51-115  | 49-100  | 55-118  | 42-76   |  |
| 50                          | 235-403 | 96-290                           | 112-299 | 68-140 | 30-129  | 25-124  | 34-111  | 29-173  | 46-154  | 28-145  |  |

95% confidence interval

| p-values          |       | Time bin (minutes post exposure) |       |        |         |         |         |         |         |         |  |
|-------------------|-------|----------------------------------|-------|--------|---------|---------|---------|---------|---------|---------|--|
| [ $\mu\text{M}$ ] | 1-30  | 31-60                            | 61-90 | 91-120 | 121-150 | 151-180 | 181-210 | 211-240 | 241-270 | 271-300 |  |
| 1                 | 0.140 | 0.865                            | 0.980 | 0.985  | 1.000   | 1.000   | 1.000   | 0.998   | 0.976   | 1.000   |  |
| 5                 | 0.605 | 1.000                            | 0.997 | 1.000  | 0.998   | 0.999   | 1.000   | 1.000   | 1.000   | 0.997   |  |
| 10                | 0.238 | 0.996                            | 1.000 | 0.617  | 0.600   | 0.716   | 0.788   | 0.404   | 0.816   | 0.262   |  |
| 25                | 0.608 | 0.927                            | 0.999 | 0.999  | 0.999   | 0.977   | 0.995   | 0.994   | 0.996   | 0.740   |  |
| 50                | 0.001 | 0.765                            | 0.101 | 1.000  | 0.901   | 0.722   | 0.828   | 0.997   | 1.000   | 0.767   |  |

Two-way repeated measures ANOVA, Tukey's post-hoc,  $p \leq 0.05$

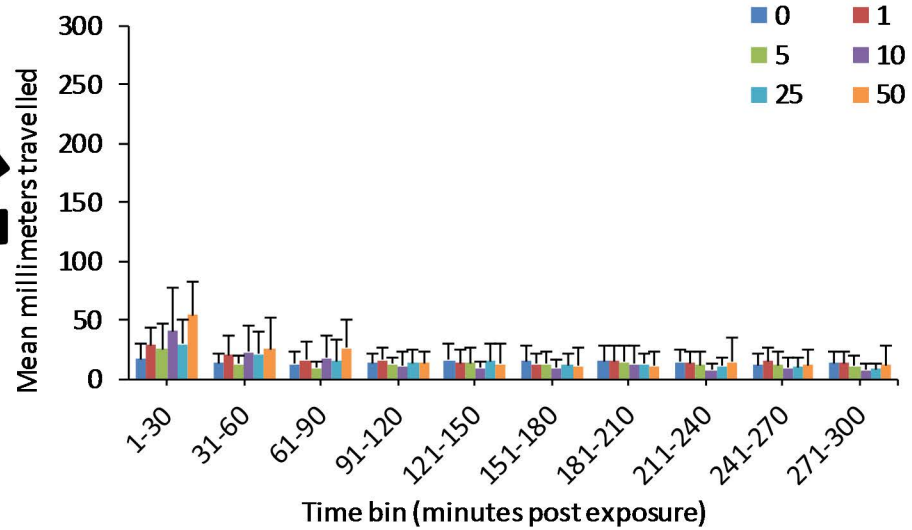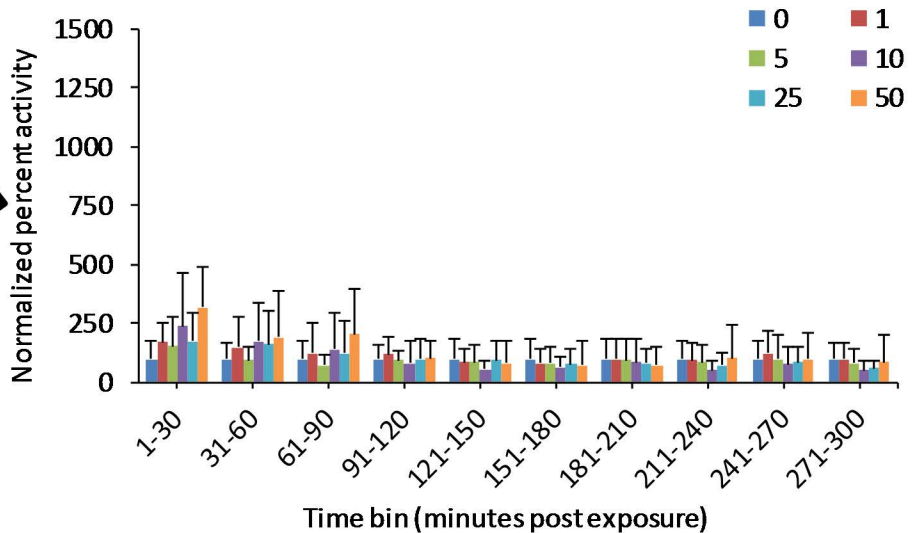

# CHEMICAL: Naringenin

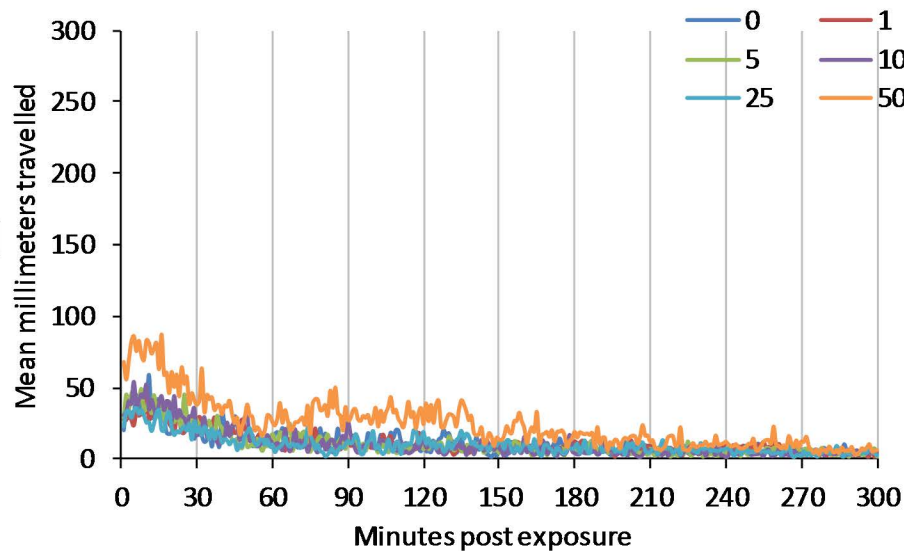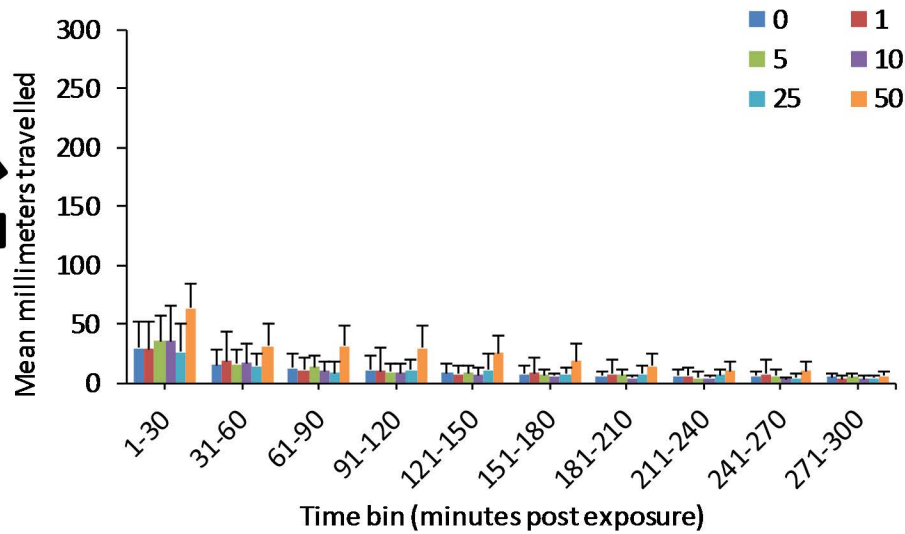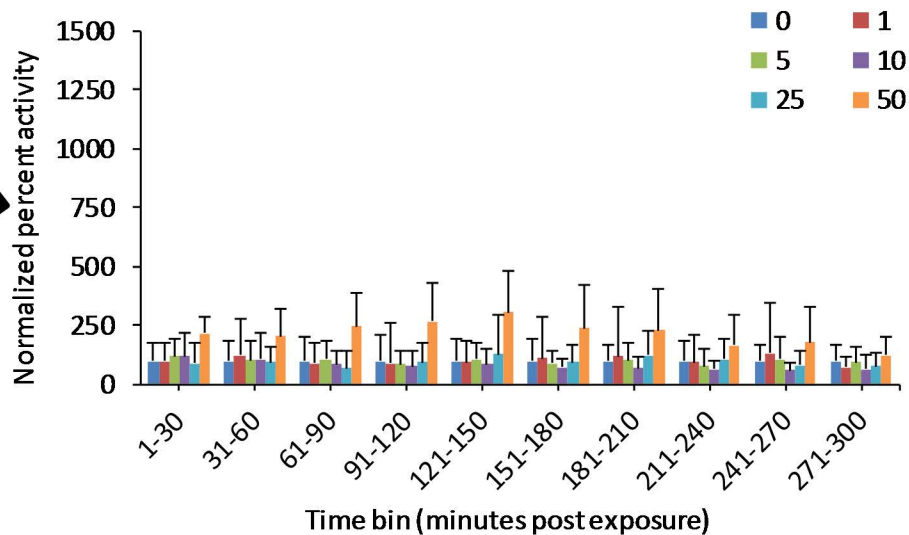

## Normalized percent activity

| [μM] | Time bin (minutes post exposure) |           |           |           |           |           |           |           |           |          | N  |
|------|----------------------------------|-----------|-----------|-----------|-----------|-----------|-----------|-----------|-----------|----------|----|
|      | 1-30                             | 31-60     | 61-90     | 91-120    | 121-150   | 151-180   | 181-210   | 211-240   | 241-270   | 271-300  |    |
| 0    | 100 ± 75                         | 100 ± 82  | 100 ± 102 | 100 ± 107 | 100 ± 92  | 100 ± 90  | 100 ± 67  | 100 ± 84  | 100 ± 70  | 100 ± 65 | 16 |
| 1    | 98 ± 77                          | 123 ± 157 | 90 ± 86   | 91 ± 167  | 93 ± 94   | 113 ± 172 | 120 ± 213 | 95 ± 115  | 133 ± 217 | 73 ± 49  | 16 |
| 5    | 119 ± 72                         | 104 ± 79  | 109 ± 77  | 86 ± 57   | 107 ± 74  | 91 ± 48   | 104 ± 73  | 77 ± 75   | 106 ± 100 | 95 ± 63  | 16 |
| 10   | 121 ± 100                        | 108 ± 109 | 84 ± 61   | 75 ± 67   | 87 ± 66   | 71 ± 40   | 69 ± 45   | 65 ± 39   | 60 ± 32   | 65 ± 57  | 16 |
| 25   | 88 ± 85                          | 93 ± 70   | 69 ± 72   | 94 ± 87   | 130 ± 164 | 94 ± 77   | 125 ± 101 | 106 ± 86  | 81 ± 63   | 77 ± 58  | 16 |
| 50   | 216 ± 72                         | 205 ± 117 | 247 ± 139 | 266 ± 165 | 305 ± 175 | 237 ± 182 | 230 ± 174 | 168 ± 124 | 178 ± 149 | 123 ± 81 | 16 |

## Mean ± standard deviation

## Normalized percent activity

| [μM] | Time bin (minutes post exposure) |         |         |         |         |         |         |         |         |         |
|------|----------------------------------|---------|---------|---------|---------|---------|---------|---------|---------|---------|
|      | 1-30                             | 31-60   | 61-90   | 91-120  | 121-150 | 151-180 | 181-210 | 211-240 | 241-270 | 271-300 |
| 0    | 63-137                           | 59-141  | 49-151  | 47-153  | 54-146  | 55-145  | 67-133  | 58-142  | 65-135  | 67-133  |
| 1    | 60-136                           | 45-202  | 47-134  | 8-175   | 46-141  | 27-199  | 13-226  | 38-152  | 24-241  | 48-97   |
| 5    | 84-155                           | 65-144  | 71-147  | 57-114  | 70-144  | 67-115  | 67-141  | 39-114  | 55-156  | 64-127  |
| 10   | 71-171                           | 54-163  | 53-114  | 42-109  | 54-120  | 51-91   | 47-91   | 46-85   | 44-77   | 36-93   |
| 25   | 46-131                           | 58-128  | 33-105  | 51-137  | 48-112  | 55-133  | 74-175  | 63-149  | 50-112  | 48-106  |
| 50   | 180-252                          | 146-264 | 177-316 | 183-348 | 217-392 | 146-328 | 143-317 | 106-229 | 104-253 | 82-163  |

## 95% confidence interval

## p-values

| [μM] | Time bin (minutes post exposure) |       |       |        |         |         |         |         |         |         |
|------|----------------------------------|-------|-------|--------|---------|---------|---------|---------|---------|---------|
|      | 1-30                             | 31-60 | 61-90 | 91-120 | 121-150 | 151-180 | 181-210 | 211-240 | 241-270 | 271-300 |
| 1    | 1.000                            | 0.957 | 0.992 | 0.839  | 0.986   | 1.000   | 0.999   | 0.999   | 1.000   | 0.944   |
| 5    | 0.861                            | 1.000 | 0.996 | 1.000  | 0.994   | 1.000   | 1.000   | 0.820   | 1.000   | 1.000   |
| 10   | 0.961                            | 1.000 | 1.000 | 0.981  | 1.000   | 0.999   | 0.948   | 0.925   | 0.903   | 0.565   |
| 25   | 0.953                            | 0.994 | 0.568 | 1.000  | 1.000   | 1.000   | 0.993   | 1.000   | 0.986   | 0.949   |
| 50   | 0.007                            | 0.066 | 0.005 | 0.001  | 0.001   | 0.084   | 0.060   | 0.444   | 0.385   | 0.986   |

Two-way repeated measures ANOVA, Tukey's post-hoc,  $p \leq 0.05$



# CHEMICAL: Puerarin

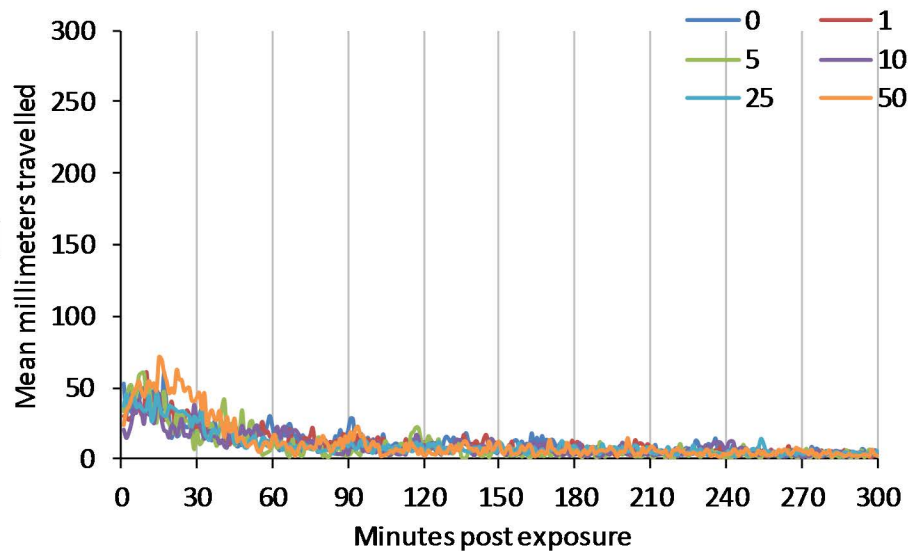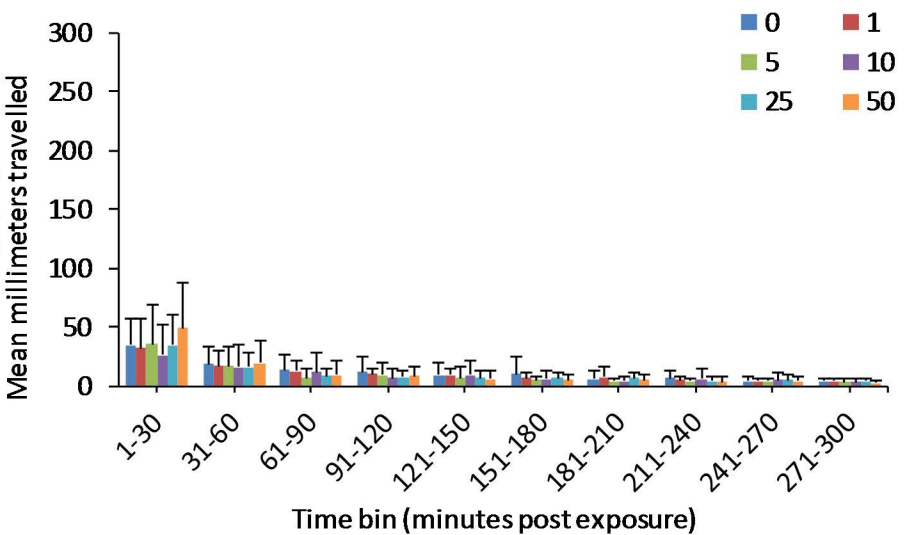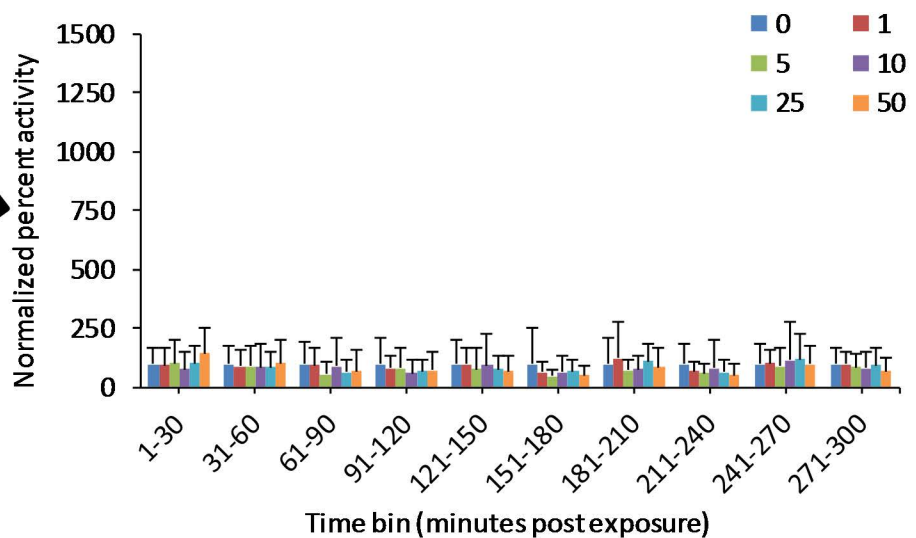

## Normalized percent activity

|                   | Time bin (minutes post exposure) |          |          |           |           |           |           |          |           |          |    |
|-------------------|----------------------------------|----------|----------|-----------|-----------|-----------|-----------|----------|-----------|----------|----|
| [ $\mu\text{M}$ ] | 1-30                             | 31-60    | 61-90    | 91-120    | 121-150   | 151-180   | 181-210   | 211-240  | 241-270   | 271-300  | N  |
| 0                 | 100 ± 68                         | 100 ± 76 | 100 ± 97 | 100 ± 107 | 100 ± 105 | 100 ± 156 | 100 ± 110 | 100 ± 85 | 100 ± 89  | 100 ± 70 | 16 |
| 1                 | 94 ± 72                          | 91 ± 67  | 94 ± 74  | 83 ± 49   | 100 ± 64  | 66 ± 44   | 124 ± 152 | 71 ± 41  | 102 ± 59  | 100 ± 51 | 16 |
| 5                 | 103 ± 96                         | 88 ± 87  | 54 ± 54  | 80 ± 88   | 76 ± 90   | 47 ± 32   | 73 ± 46   | 60 ± 41  | 90 ± 74   | 87 ± 55  | 16 |
| 10                | 77 ± 73                          | 85 ± 102 | 91 ± 119 | 60 ± 60   | 94 ± 134  | 62 ± 71   | 76 ± 60   | 82 ± 123 | 117 ± 165 | 83 ± 66  | 16 |
| 25                | 101 ± 76                         | 85 ± 63  | 66 ± 50  | 68 ± 47   | 76 ± 56   | 70 ± 47   | 109 ± 77  | 64 ± 51  | 118 ± 111 | 96 ± 75  | 16 |
| 50                | 143 ± 113                        | 104 ± 97 | 70 ± 88  | 71 ± 76   | 67 ± 70   | 54 ± 42   | 86 ± 79   | 53 ± 52  | 98 ± 80   | 68 ± 61  | 16 |

## Mean ± standard deviation

## Normalized percent activity

|                   | Time bin (minutes post exposure) |        |        |        |         |         |         |         |         |         |
|-------------------|----------------------------------|--------|--------|--------|---------|---------|---------|---------|---------|---------|
| [ $\mu\text{M}$ ] | 1-30                             | 31-60  | 61-90  | 91-120 | 121-150 | 151-180 | 181-210 | 211-240 | 241-270 | 271-300 |
| 0                 | 66-134                           | 62-138 | 51-149 | 47-153 | 48-152  | 22-178  | 45-155  | 57-143  | 56-144  | 65-135  |
| 1                 | 58-130                           | 58-125 | 57-131 | 59-108 | 68-132  | 43-88   | 49-200  | 50-91   | 72-131  | 74-126  |
| 5                 | 55-151                           | 45-132 | 27-81  | 36-124 | 31-121  | 31-63   | 50-96   | 40-80   | 53-127  | 60-114  |
| 10                | 40-113                           | 34-136 | 31-150 | 30-90  | 27-161  | 27-98   | 46-106  | 21-143  | 34-199  | 50-116  |
| 25                | 63-140                           | 54-117 | 41-90  | 44-92  | 48-104  | 47-93   | 71-148  | 38-90   | 62-173  | 58-134  |
| 50                | 87-199                           | 55-152 | 26-114 | 33-109 | 32-102  | 33-75   | 46-126  | 27-79   | 58-138  | 38-99   |

## 95% confidence interval

## p-values

|                   | Time bin (minutes post exposure) |       |       |        |         |         |         |         |         |         |
|-------------------|----------------------------------|-------|-------|--------|---------|---------|---------|---------|---------|---------|
| [ $\mu\text{M}$ ] | 1-30                             | 31-60 | 61-90 | 91-120 | 121-150 | 151-180 | 181-210 | 211-240 | 241-270 | 271-300 |
| 1                 | 1.000                            | 1.000 | 1.000 | 1.000  | 0.988   | 0.997   | 0.945   | 0.988   | 0.993   | 1.000   |
| 5                 | 1.000                            | 0.999 | 0.486 | 0.993  | 0.945   | 0.731   | 1.000   | 0.773   | 1.000   | 1.000   |
| 10                | 0.899                            | 0.514 | 0.629 | 0.908  | 0.957   | 0.926   | 1.000   | 0.880   | 1.000   | 0.990   |
| 25                | 1.000                            | 1.000 | 0.694 | 1.000  | 0.997   | 1.000   | 0.984   | 0.721   | 0.999   | 0.999   |
| 50                | 1.000                            | 0.899 | 0.215 | 0.777  | 0.660   | 0.752   | 1.000   | 0.225   | 1.000   | 0.586   |

Two-way repeated measures ANOVA, Tukey's post-hoc,  $p \leq 0.05$

# CHEMICAL: Quercetin

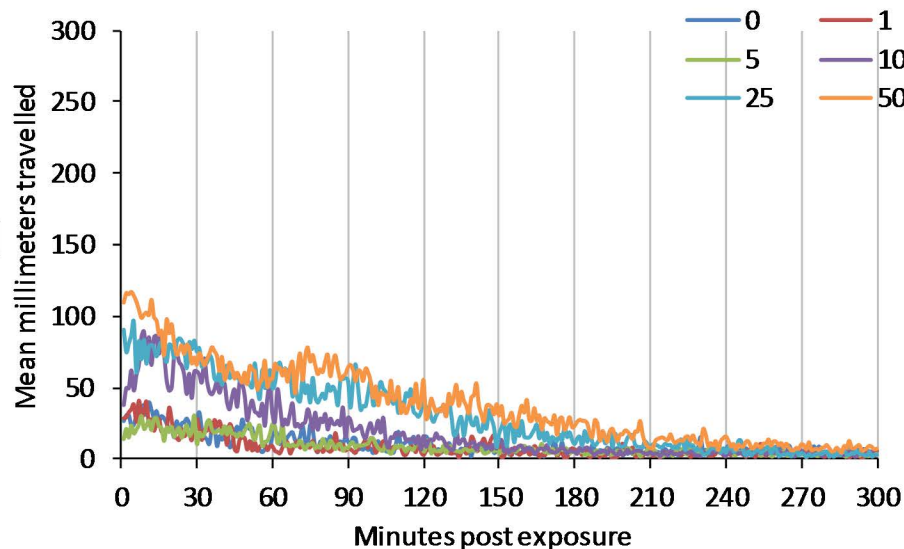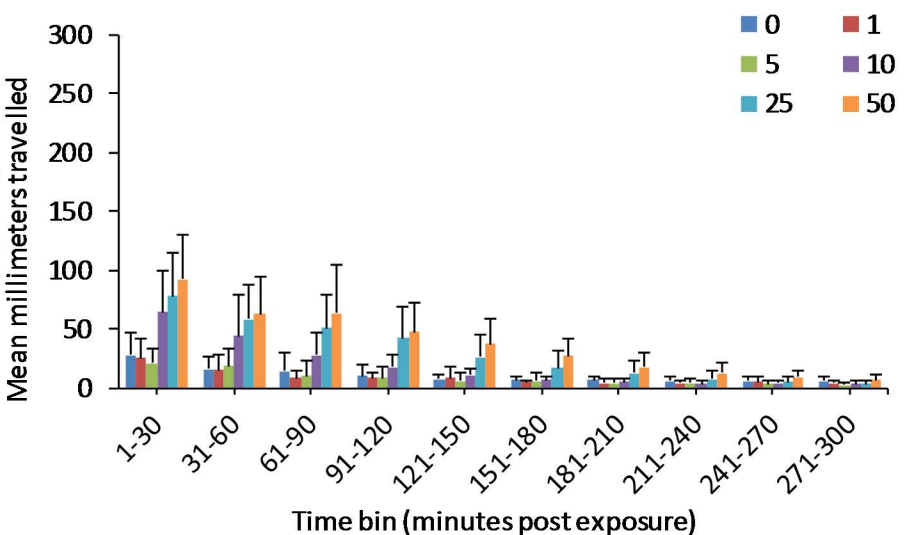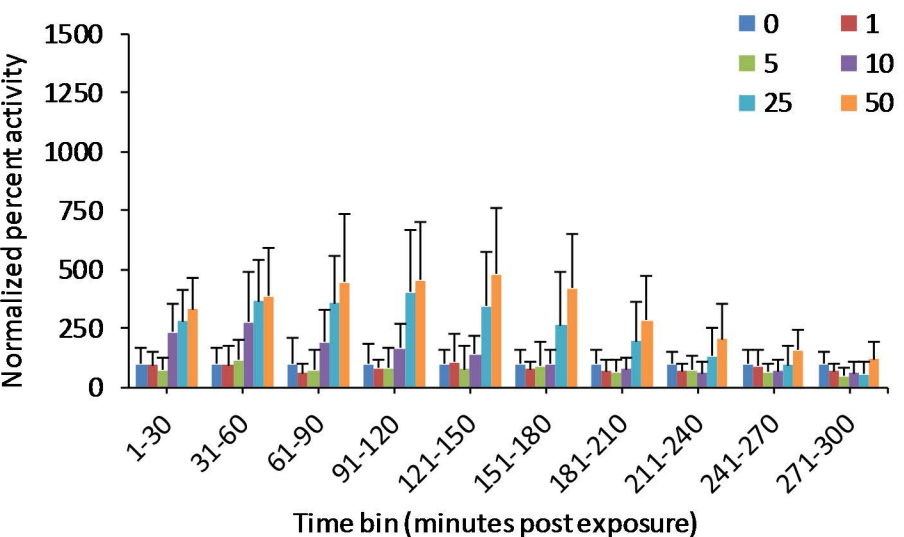

## Normalized percent activity

|      | Time bin (minutes post exposure) |           |           |           |           |           |           |           |          |          |    |
|------|----------------------------------|-----------|-----------|-----------|-----------|-----------|-----------|-----------|----------|----------|----|
| [μM] | 1-30                             | 31-60     | 61-90     | 91-120    | 121-150   | 151-180   | 181-210   | 211-240   | 241-270  | 271-300  | N  |
| 0    | 100 ± 68                         | 100 ± 71  | 100 ± 114 | 100 ± 89  | 100 ± 57  | 100 ± 59  | 100 ± 64  | 100 ± 53  | 100 ± 63 | 100 ± 55 | 16 |
| 1    | 93 ± 58                          | 94 ± 84   | 61 ± 39   | 80 ± 39   | 107 ± 120 | 76 ± 32   | 70 ± 47   | 70 ± 33   | 92 ± 66  | 69 ± 31  | 16 |
| 5    | 75 ± 48                          | 116 ± 87  | 71 ± 86   | 81 ± 89   | 76 ± 101  | 90 ± 100  | 64 ± 52   | 72 ± 60   | 63 ± 39  | 48 ± 32  | 16 |
| 10   | 233 ± 123                        | 276 ± 214 | 193 ± 136 | 167 ± 106 | 141 ± 81  | 99 ± 64   | 75 ± 53   | 61 ± 50   | 69 ± 47  | 60 ± 52  | 16 |
| 25   | 279 ± 130                        | 364 ± 178 | 355 ± 203 | 403 ± 264 | 343 ± 234 | 265 ± 222 | 194 ± 169 | 133 ± 119 | 93 ± 81  | 57 ± 56  | 16 |
| 50   | 332 ± 135                        | 387 ± 201 | 444 ± 292 | 454 ± 244 | 479 ± 283 | 419 ± 232 | 283 ± 189 | 205 ± 148 | 156 ± 92 | 122 ± 76 | 16 |

## Mean ± standard deviation

## Normalized percent activity

|      | Time bin (minutes post exposure) |         |         |         |         |         |         |         |         |         |
|------|----------------------------------|---------|---------|---------|---------|---------|---------|---------|---------|---------|
| [μM] | 1-30                             | 31-60   | 61-90   | 91-120  | 121-150 | 151-180 | 181-210 | 211-240 | 241-270 | 271-300 |
| 0    | 66-134                           | 65-135  | 43-167  | 56-144  | 71-129  | 71-129  | 68-132  | 73-127  | 69-131  | 72-128  |
| 1    | 64-122                           | 52-137  | 41-81   | 61-100  | 47-167  | 60-92   | 47-94   | 53-87   | 59-125  | 54-85   |
| 5    | 51-99                            | 72-159  | 28-115  | 36-125  | 25-126  | 40-140  | 37-90   | 42-102  | 44-83   | 33-64   |
| 10   | 171-294                          | 169-383 | 125-261 | 114-220 | 100-181 | 67-131  | 49-102  | 36-86   | 45-93   | 35-86   |
| 25   | 214-345                          | 275-453 | 253-456 | 271-535 | 226-460 | 154-376 | 109-279 | 73-192  | 53-133  | 29-85   |
| 50   | 265-399                          | 287-488 | 298-590 | 333-576 | 337-620 | 303-535 | 188-377 | 132-279 | 110-202 | 84-160  |

## 95% confidence interval

## p-values

|      | Time bin (minutes post exposure) |       |       |        |         |         |         |         |         |         |
|------|----------------------------------|-------|-------|--------|---------|---------|---------|---------|---------|---------|
| [μM] | 1-30                             | 31-60 | 61-90 | 91-120 | 121-150 | 151-180 | 181-210 | 211-240 | 241-270 | 271-300 |
| 1    | 1.000                            | 1.000 | 0.743 | 1.000  | 1.000   | 0.981   | 0.762   | 0.895   | 1.000   | 0.863   |
| 5    | 0.924                            | 0.993 | 0.928 | 0.724  | 0.185   | 0.761   | 0.371   | 0.469   | 0.604   | 0.062   |
| 10   | 0.011                            | 0.006 | 0.029 | 0.228  | 0.812   | 1.000   | 0.914   | 0.226   | 0.752   | 0.157   |
| 25   | 0.001                            | 0.001 | 0.001 | 0.001  | 0.001   | 0.073   | 0.606   | 0.999   | 0.893   | 0.045   |
| 50   | 0.001                            | 0.001 | 0.001 | 0.001  | 0.001   | 0.001   | 0.001   | 0.161   | 0.393   | 0.991   |

Two-way repeated measures ANOVA, Tukey's post-hoc,  $p \leq 0.05$

# CHEMICAL: Quercetin 3-β-D glucoside

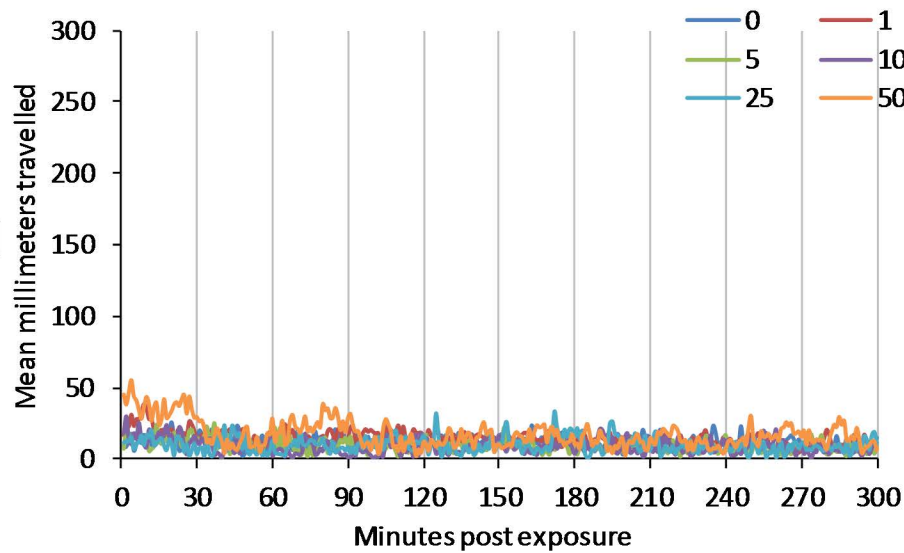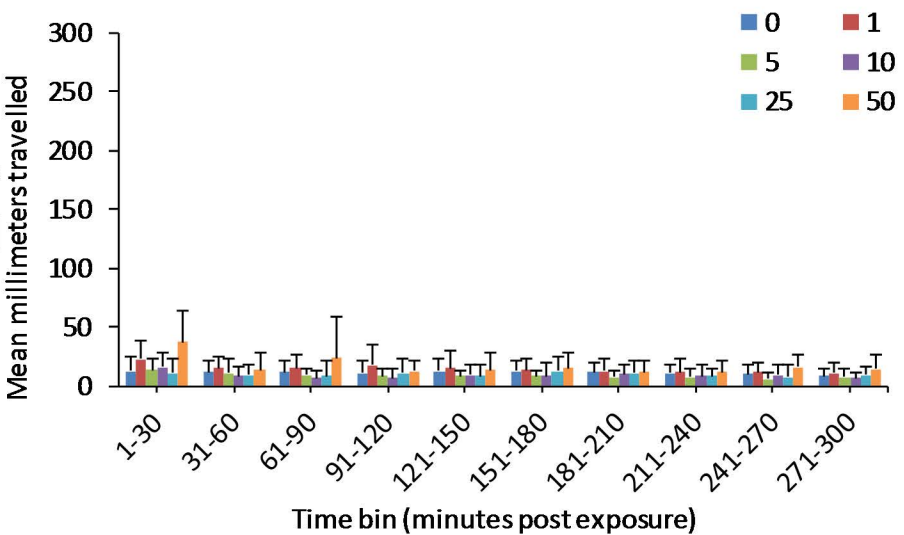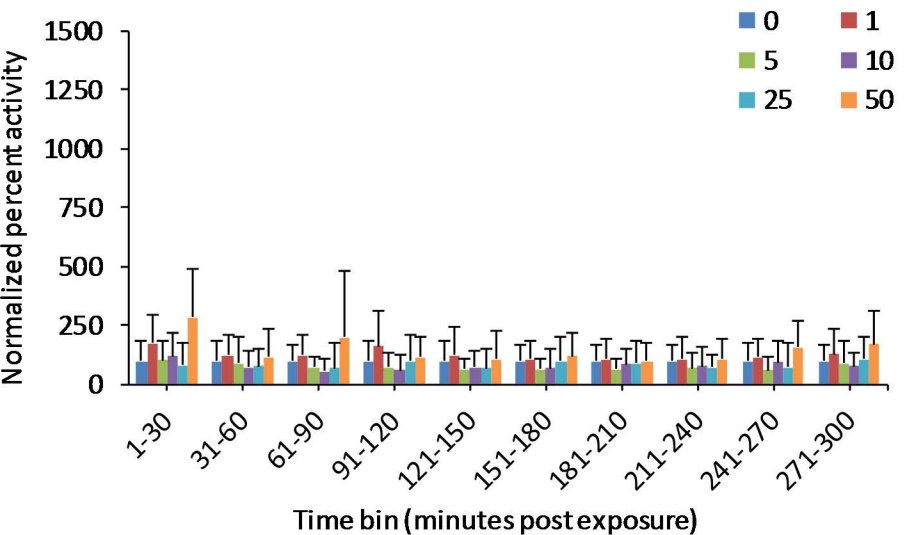

## Normalized percent activity

|      | Time bin (minutes post exposure) |           |           |           |           |           |          |          |           |           |    |
|------|----------------------------------|-----------|-----------|-----------|-----------|-----------|----------|----------|-----------|-----------|----|
| [μM] | 1-30                             | 31-60     | 61-90     | 91-120    | 121-150   | 151-180   | 181-210  | 211-240  | 241-270   | 271-300   | N  |
| 0    | 100 ± 89                         | 100 ± 82  | 100 ± 71  | 100 ± 85  | 100 ± 81  | 100 ± 69  | 100 ± 71 | 100 ± 65 | 100 ± 79  | 100 ± 72  | 16 |
| 1    | 174 ± 121                        | 124 ± 89  | 124 ± 90  | 160 ± 151 | 124 ± 117 | 107 ± 77  | 107 ± 83 | 109 ± 93 | 115 ± 78  | 126 ± 111 | 16 |
| 5    | 104 ± 80                         | 91 ± 107  | 74 ± 44   | 74 ± 59   | 65 ± 43   | 64 ± 41   | 63 ± 44  | 67 ± 63  | 61 ± 53   | 90 ± 92   | 16 |
| 10   | 121 ± 96                         | 73 ± 70   | 54 ± 54   | 62 ± 66   | 74 ± 69   | 68 ± 83   | 85 ± 64  | 78 ± 82  | 93 ± 89   | 77 ± 53   | 16 |
| 25   | 83 ± 94                          | 75 ± 75   | 70 ± 102  | 98 ± 111  | 68 ± 80   | 100 ± 100 | 92 ± 92  | 72 ± 57  | 71 ± 108  | 106 ± 93  | 16 |
| 50   | 283 ± 204                        | 115 ± 118 | 198 ± 285 | 115 ± 84  | 109 ± 120 | 118 ± 104 | 97 ± 80  | 109 ± 85 | 159 ± 108 | 171 ± 141 | 16 |

## Mean ± standard deviation

## Normalized percent activity

|      | Time bin (minutes post exposure) |        |        |        |         |         |         |         |         |         |
|------|----------------------------------|--------|--------|--------|---------|---------|---------|---------|---------|---------|
| [μM] | 1-30                             | 31-60  | 61-90  | 91-120 | 121-150 | 151-180 | 181-210 | 211-240 | 241-270 | 271-300 |
| 0    | 55-145                           | 59-141 | 65-135 | 57-143 | 59-141  | 65-135  | 65-135  | 67-133  | 61-139  | 64-136  |
| 1    | 114-235                          | 80-168 | 80-169 | 84-235 | 65-182  | 68-145  | 65-148  | 62-155  | 76-154  | 71-181  |
| 5    | 64-144                           | 38-145 | 52-96  | 44-104 | 43-86   | 44-85   | 41-85   | 35-99   | 34-87   | 45-136  |
| 10   | 73-170                           | 38-108 | 27-81  | 29-95  | 39-109  | 27-110  | 53-117  | 37-120  | 49-137  | 50-104  |
| 25   | 36-130                           | 38-113 | 19-121 | 43-154 | 28-108  | 50-150  | 46-138  | 43-100  | 18-125  | 59-152  |
| 50   | 181-385                          | 56-174 | 56-341 | 73-157 | 49-169  | 66-170  | 57-138  | 66-151  | 105-213 | 101-241 |

## 95% confidence interval

## p-values

|      | Time bin (minutes post exposure) |       |       |        |         |         |         |         |         |         |
|------|----------------------------------|-------|-------|--------|---------|---------|---------|---------|---------|---------|
| [μM] | 1-30                             | 31-60 | 61-90 | 91-120 | 121-150 | 151-180 | 181-210 | 211-240 | 241-270 | 271-300 |
| 1    | 0.422                            | 0.996 | 0.993 | 0.901  | 0.983   | 1.000   | 1.000   | 1.000   | 0.974   | 0.998   |
| 5    | 1.000                            | 0.997 | 0.964 | 0.977  | 0.955   | 0.815   | 0.719   | 0.729   | 0.835   | 0.981   |
| 10   | 0.999                            | 0.817 | 0.093 | 0.388  | 0.955   | 0.361   | 0.974   | 0.794   | 1.000   | 0.955   |
| 25   | 0.838                            | 0.924 | 0.369 | 0.979  | 0.437   | 0.963   | 0.866   | 0.840   | 0.798   | 1.000   |
| 50   | 0.010                            | 1.000 | 0.981 | 0.999  | 1.000   | 1.000   | 1.000   | 1.000   | 0.600   | 0.953   |

Two-way repeated measures ANOVA, Tukey's post-hoc,  $p \leq 0.05$

# CHEMICAL: Resveratrol

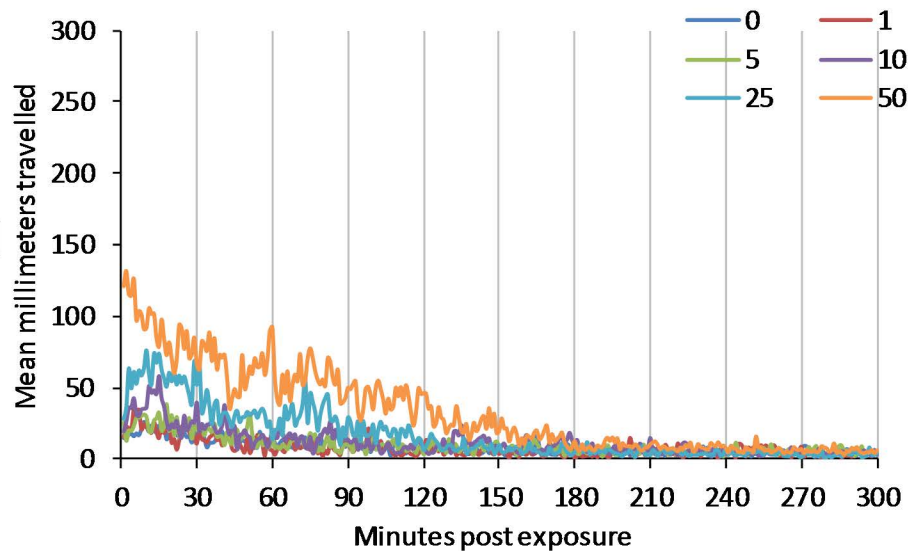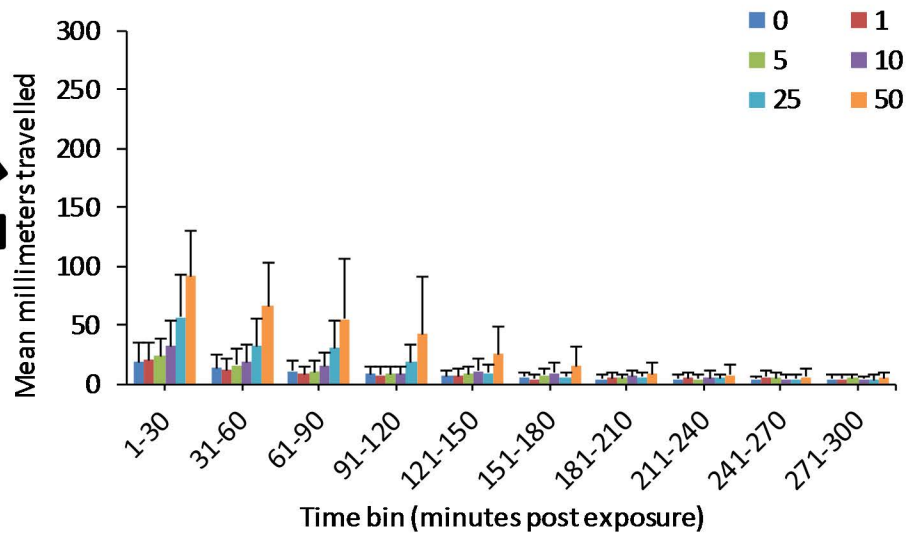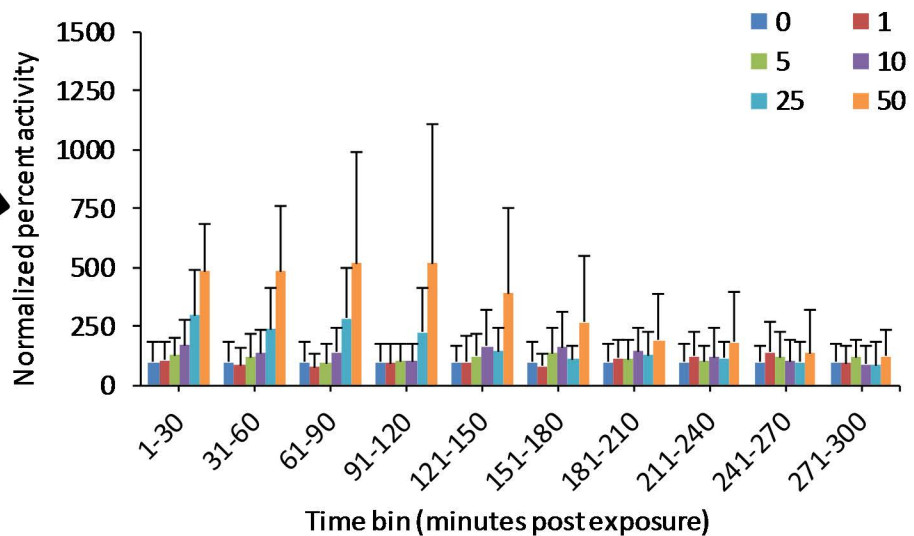

## Normalized percent activity

|                   | Time bin (minutes post exposure) |           |           |           |           |           |           |           |           |           |    |
|-------------------|----------------------------------|-----------|-----------|-----------|-----------|-----------|-----------|-----------|-----------|-----------|----|
| [ $\mu\text{M}$ ] | 1-30                             | 31-60     | 61-90     | 91-120    | 121-150   | 151-180   | 181-210   | 211-240   | 241-270   | 271-300   | N  |
| 0                 | 100 ± 82                         | 100 ± 89  | 100 ± 82  | 100 ± 81  | 100 ± 71  | 100 ± 81  | 100 ± 73  | 100 ± 80  | 100 ± 65  | 100 ± 80  | 16 |
| 1                 | 108 ± 77                         | 84 ± 71   | 78 ± 55   | 92 ± 83   | 100 ± 12  | 81 ± 53   | 113 ± 84  | 123 ± 108 | 142 ± 130 | 95 ± 76   | 16 |
| 5                 | 127 ± 76                         | 121 ± 98  | 95 ± 85   | 104 ± 69  | 126 ± 91  | 137 ± 106 | 111 ± 83  | 101 ± 70  | 119 ± 108 | 121 ± 75  | 16 |
| 10                | 171 ± 109                        | 135 ± 105 | 142 ± 102 | 105 ± 69  | 166 ± 155 | 161 ± 154 | 144 ± 97  | 119 ± 126 | 103 ± 90  | 90 ± 76   | 16 |
| 25                | 299 ± 188                        | 238 ± 173 | 284 ± 211 | 226 ± 191 | 145 ± 97  | 112 ± 56  | 127 ± 104 | 113 ± 74  | 99 ± 83   | 87 ± 94   | 16 |
| 50                | 483 ± 205                        | 483 ± 275 | 516 ± 470 | 517 ± 588 | 390 ± 361 | 268 ± 277 | 190 ± 199 | 182 ± 213 | 138 ± 179 | 122 ± 117 | 16 |

## Mean ± standard deviation

## Normalized percent activity

|                   | Time bin (minutes post exposure) |         |         |         |         |         |         |         |         |         |
|-------------------|----------------------------------|---------|---------|---------|---------|---------|---------|---------|---------|---------|
| [ $\mu\text{M}$ ] | 1-30                             | 31-60   | 61-90   | 91-120  | 121-150 | 151-180 | 181-210 | 211-240 | 241-270 | 271-300 |
| 0                 | 59-141                           | 55-145  | 59-141  | 60-140  | 65-135  | 59-141  | 64-136  | 60-140  | 68-132  | 60-140  |
| 1                 | 69-146                           | 49-120  | 50-105  | 51-134  | 44-156  | 54-107  | 72-155  | 69-177  | 77-207  | 57-133  |
| 5                 | 89-165                           | 72-170  | 52-137  | 70-138  | 80-171  | 83-190  | 70-152  | 66-136  | 65-173  | 83-159  |
| 10                | 116-225                          | 83-187  | 91-193  | 70-139  | 89-244  | 84-238  | 95-192  | 56-183  | 58-148  | 52-128  |
| 25                | 205-393                          | 152-325 | 179-390 | 130-321 | 96-193  | 84-140  | 75-179  | 76-150  | 58-141  | 40-134  |
| 50                | 380-586                          | 345-620 | 280-751 | 223-811 | 210-571 | 129-407 | 90-289  | 76-289  | 49-228  | 63-180  |

## 95% confidence interval

## p-values

|                   | Time bin (minutes post exposure) |       |       |        |         |         |         |         |         |         |
|-------------------|----------------------------------|-------|-------|--------|---------|---------|---------|---------|---------|---------|
| [ $\mu\text{M}$ ] | 1-30                             | 31-60 | 61-90 | 91-120 | 121-150 | 151-180 | 181-210 | 211-240 | 241-270 | 271-300 |
| 1                 | 0.999                            | 0.894 | 0.964 | 0.991  | 0.999   | 0.997   | 0.993   | 0.996   | 0.961   | 1.000   |
| 5                 | 0.907                            | 1.000 | 0.980 | 1.000  | 0.997   | 0.955   | 0.996   | 1.000   | 1.000   | 0.993   |
| 10                | 0.241                            | 0.913 | 0.883 | 0.999  | 0.913   | 0.763   | 0.744   | 1.000   | 0.997   | 0.993   |
| 25                | 0.002                            | 0.131 | 0.012 | 0.107  | 0.784   | 0.961   | 0.985   | 0.993   | 1.000   | 0.952   |
| 50                | 0.001                            | 0.001 | 0.001 | 0.001  | 0.003   | 0.078   | 0.429   | 0.662   | 1.000   | 1.000   |

Two-way repeated measures ANOVA, Tukey's post-hoc,  $p \leq 0.05$

# Pharmacological intervention studies

**3 test chemicals:**

Picrotoxin  
(S)-Equol  
Kaempferol

**2 GABAergics:**

Alfaxalone  
Chlormethiazole

# CHEMICAL:

# Picrotoxin & Alfaxalone

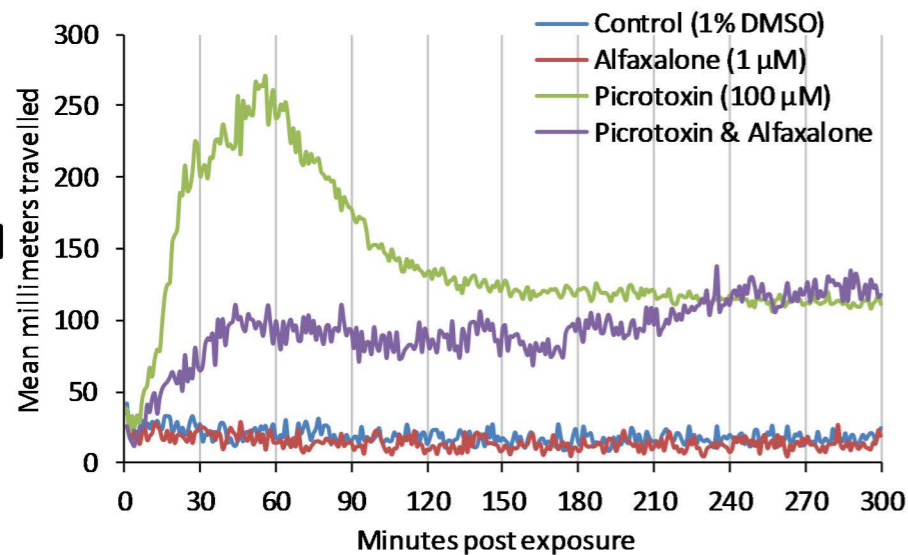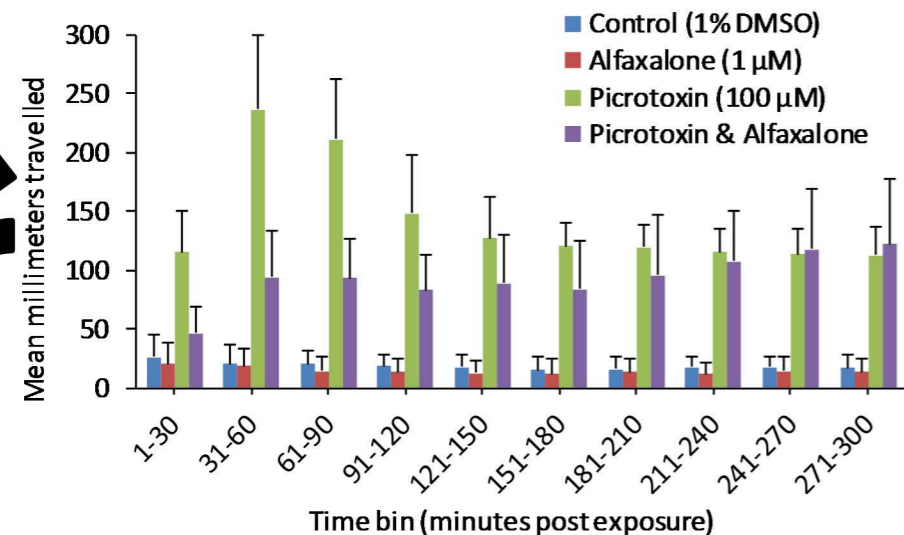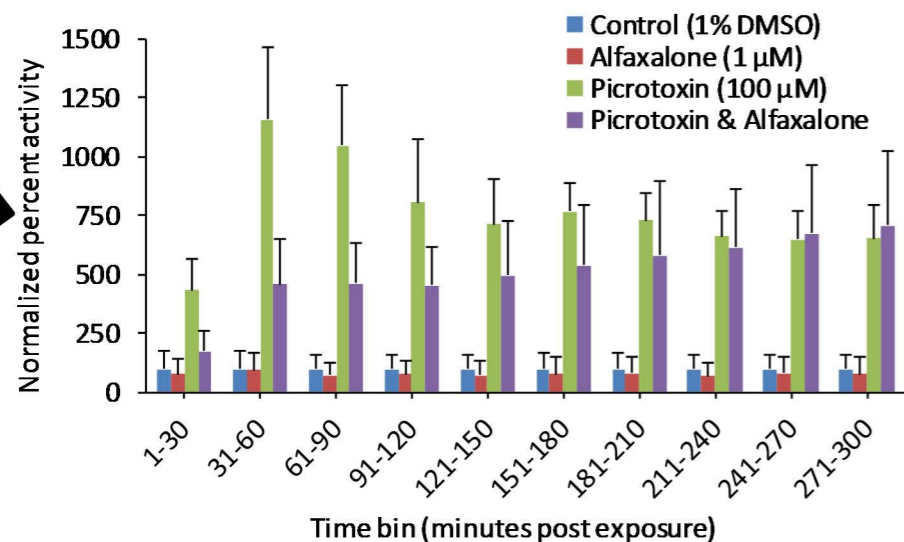

## Normalized percent activity

### Time bin (minutes post exposure)

| Treatment               | 1-30      | 31-60     | 61-90      | 91-120    | 121-150   | 151-180   | 181-210   | 211-240   | 241-270   | 271-300   | N  |
|-------------------------|-----------|-----------|------------|-----------|-----------|-----------|-----------|-----------|-----------|-----------|----|
| Control (1% DMSO)       | 100 ± 73  | 100 ± 79  | 100 ± 59   | 100 ± 58  | 100 ± 62  | 100 ± 71  | 100 ± 68  | 100 ± 57  | 100 ± 56  | 100 ± 64  | 32 |
| Alfaxalone (1 μM)       | 78 ± 66   | 93 ± 72   | 71 ± 58    | 76 ± 63   | 73 ± 59   | 78 ± 78   | 81 ± 72   | 70 ± 54   | 80 ± 73   | 78 ± 70   | 30 |
| Picrotoxin (100 μM)     | 435 ± 131 | 165 ± 306 | 1048 ± 254 | 805 ± 267 | 710 ± 197 | 768 ± 124 | 731 ± 111 | 662 ± 109 | 649 ± 125 | 654 ± 138 | 32 |
| Picrotoxin & Alfaxalone | 177 ± 87  | 458 ± 194 | 463 ± 170  | 453 ± 162 | 496 ± 232 | 538 ± 257 | 583 ± 313 | 616 ± 247 | 673 ± 295 | 708 ± 315 | 31 |

## Mean ± standard deviation

## Normalized percent activity

### Time bin (minutes post exposure)

| Treatment               | 1-30    | 31-60     | 61-90    | 91-120  | 121-150 | 151-180 | 181-210 | 211-240 | 241-270 | 271-300 |
|-------------------------|---------|-----------|----------|---------|---------|---------|---------|---------|---------|---------|
| Control (1% DMSO)       | 74-126  | 72-128    | 79-121   | 80-120  | 78-122  | 75-125  | 76-124  | 80-120  | 80-120  | 78-122  |
| Alfaxalone (1 μM)       | 54-102  | 66-119    | 50-93    | 53-99   | 52-95   | 49-106  | 55-108  | 50-90   | 54-107  | 53-104  |
| Picrotoxin (100 μM)     | 389-481 | 1047-1263 | 958-1138 | 711-900 | 641-780 | 724-812 | 692-771 | 624-701 | 605-693 | 605-702 |
| Picrotoxin & Alfaxalone | 145-208 | 389-528   | 402-524  | 395-512 | 413-580 | 446-630 | 471-696 | 527-705 | 566-779 | 595-821 |

## 95% confidence interval

## p-values

### Time bin (minutes post exposure)

| Treatment                              | 1-30  | 31-60 | 61-90 | 91-120 | 121-150 | 151-180 | 181-210 | 211-240 | 241-270 | 271-300 |
|----------------------------------------|-------|-------|-------|--------|---------|---------|---------|---------|---------|---------|
| Control vs. Alfaxalone                 | 0.102 | 0.947 | 0.049 | 0.076  | 0.072   | 0.158   | 0.397   | 0.051   | 0.275   | 0.242   |
| Control vs. Picrotoxin                 | 0.001 | 0.001 | 0.001 | 0.001  | 0.001   | 0.001   | 0.001   | 0.001   | 0.001   | 0.001   |
| Control vs. Picrotoxin & Alfaxalone    | 0.001 | 0.001 | 0.001 | 0.001  | 0.001   | 0.001   | 0.001   | 0.001   | 0.001   | 0.001   |
| Alfaxalone vs. Picrotoxin              | 0.001 | 0.001 | 0.001 | 0.001  | 0.001   | 0.001   | 0.001   | 0.001   | 0.001   | 0.001   |
| Alfaxalone vs. Picrotoxin & Alfaxalone | 0.001 | 0.001 | 0.001 | 0.001  | 0.001   | 0.001   | 0.001   | 0.001   | 0.001   | 0.001   |
| Picrotoxin vs. Picrotoxin & Alfaxalone | 0.001 | 0.001 | 0.001 | 0.001  | 0.001   | 0.001   | 0.020   | 0.583   | 0.987   | 0.998   |

## Two-way repeated measures ANOVA, Tukey's post-hoc, p ≤ 0.05

# CHEMICAL: Picrotoxin & Chlormethiazole

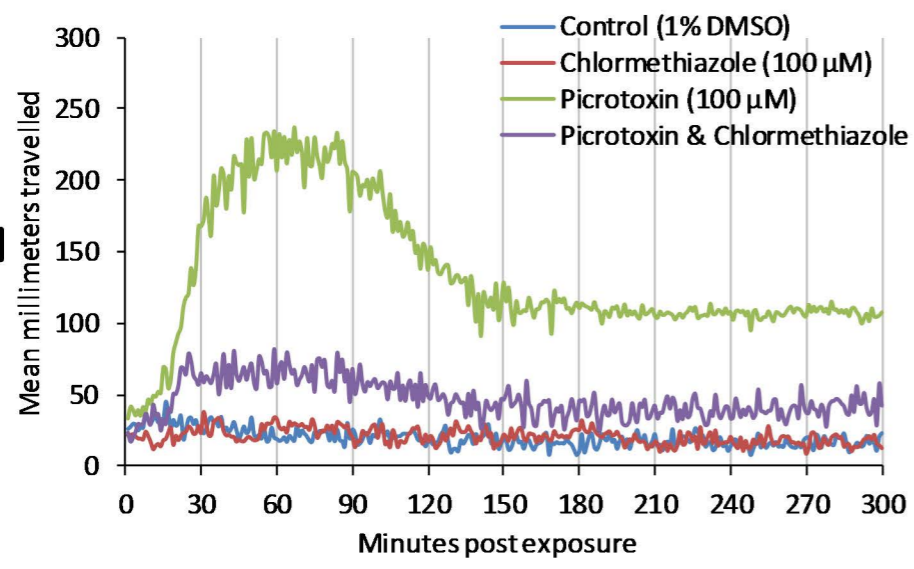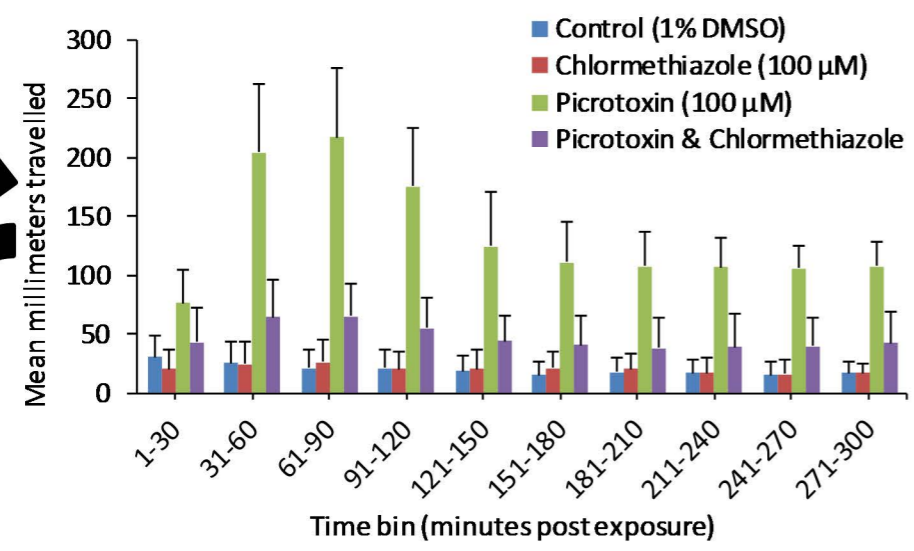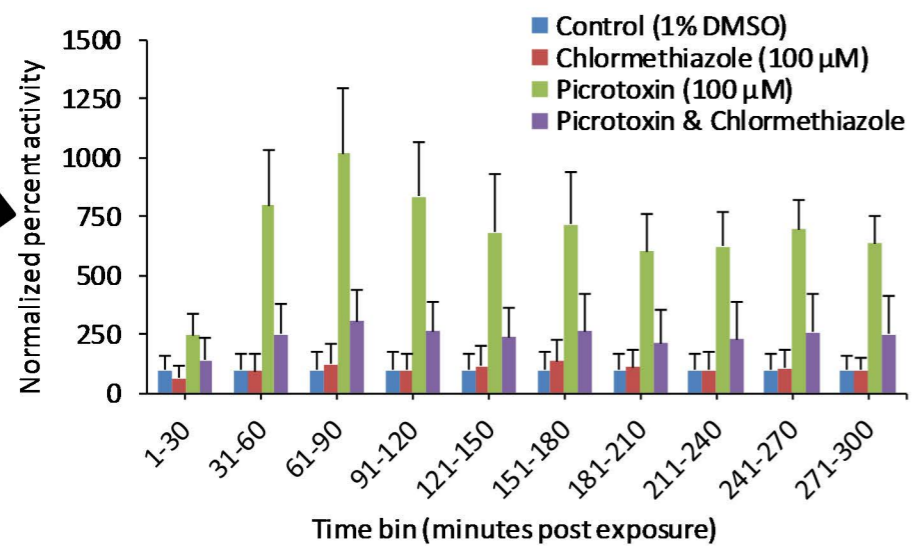

## Normalized percent activity

| Treatment                    | Time bin (minutes post exposure) |           |            |           |           |           |           |           |           |           | N  |
|------------------------------|----------------------------------|-----------|------------|-----------|-----------|-----------|-----------|-----------|-----------|-----------|----|
|                              | 1-30                             | 31-60     | 61-90      | 91-120    | 121-150   | 151-180   | 181-210   | 211-240   | 241-270   | 271-300   |    |
| Control (1% DMSO)            | 100 ± 59                         | 100 ± 72  | 100 ± 77   | 100 ± 76  | 100 ± 72  | 100 ± 74  | 100 ± 72  | 100 ± 67  | 100 ± 70  | 100 ± 62  | 31 |
| Chlormethiazole (100 μM)     | 66 ± 54                          | 96 ± 74   | 124 ± 86   | 98 ± 70   | 113 ± 85  | 137 ± 95  | 112 ± 74  | 98 ± 76   | 107 ± 81  | 98 ± 54   | 30 |
| Picrotoxin (100 μM)          | 247 ± 94                         | 799 ± 231 | 1016 ± 278 | 835 ± 233 | 682 ± 247 | 718 ± 221 | 603 ± 158 | 623 ± 144 | 694 ± 128 | 635 ± 121 | 31 |
| Picrotoxin & Chlormethiazole | 142 ± 95                         | 251 ± 126 | 305 ± 131  | 262 ± 123 | 239 ± 122 | 264 ± 156 | 213 ± 145 | 229 ± 161 | 259 ± 160 | 249 ± 164 | 29 |

Mean ± standard deviation

## Normalized percent activity

| Treatment                    | Time bin (minutes post exposure) |         |          |         |         |         |         |         |         |         |
|------------------------------|----------------------------------|---------|----------|---------|---------|---------|---------|---------|---------|---------|
|                              | 1-30                             | 31-60   | 61-90    | 91-120  | 121-150 | 151-180 | 181-210 | 211-240 | 241-270 | 271-300 |
| Control (1% DMSO)            | 79-121                           | 74-126  | 72-128   | 73-127  | 74-126  | 73-127  | 74-126  | 76-124  | 75-125  | 78-122  |
| Chlormethiazole (100 μM)     | 46-86                            | 69-123  | 93-155   | 72-123  | 82-144  | 102-171 | 85-139  | 71-126  | 78-137  | 79-118  |
| Picrotoxin (100 μM)          | 214-281                          | 716-882 | 916-1116 | 751-918 | 593-770 | 638-797 | 546-660 | 571-674 | 648-740 | 591-678 |
| Picrotoxin & Chlormethiazole | 107-177                          | 205-298 | 256-354  | 217-308 | 193-284 | 206-322 | 159-267 | 169-289 | 200-319 | 188-310 |

95% confidence interval

## p-values

| Treatment                                        | Time bin (minutes post exposure) |       |       |        |         |         |         |         |         |         |
|--------------------------------------------------|----------------------------------|-------|-------|--------|---------|---------|---------|---------|---------|---------|
|                                                  | 1-30                             | 31-60 | 61-90 | 91-120 | 121-150 | 151-180 | 181-210 | 211-240 | 241-270 | 271-300 |
| Control vs. Chlormethiazole                      | 0.015                            | 0.593 | 0.602 | 0.997  | 0.990   | 0.281   | 0.966   | 0.940   | 1.000   | 0.998   |
| Control vs. Picrotoxin                           | 0.001                            | 0.001 | 0.001 | 0.001  | 0.001   | 0.001   | 0.001   | 0.001   | 0.001   | 0.001   |
| Control vs. Picrotoxin & Chlormethiazole         | 0.451                            | 0.001 | 0.001 | 0.001  | 0.001   | 0.001   | 0.001   | 0.001   | 0.001   | 0.001   |
| Chlormethiazole vs. Picrotoxin                   | 0.001                            | 0.001 | 0.001 | 0.001  | 0.001   | 0.001   | 0.001   | 0.001   | 0.001   | 0.001   |
| Chlormethiazole vs. Picrotoxin & Chlormethiazole | 0.001                            | 0.001 | 0.001 | 0.001  | 0.001   | 0.001   | 0.001   | 0.001   | 0.001   | 0.001   |
| Picrotoxin vs. Picrotoxin & Chlormethiazole      | 0.001                            | 0.001 | 0.001 | 0.001  | 0.001   | 0.001   | 0.001   | 0.001   | 0.001   | 0.001   |

Two-way repeated measures ANOVA, Tukey's post-hoc,  $p \leq 0.05$

# CHEMICAL:

# (S)-Equlol & Alfaxalone

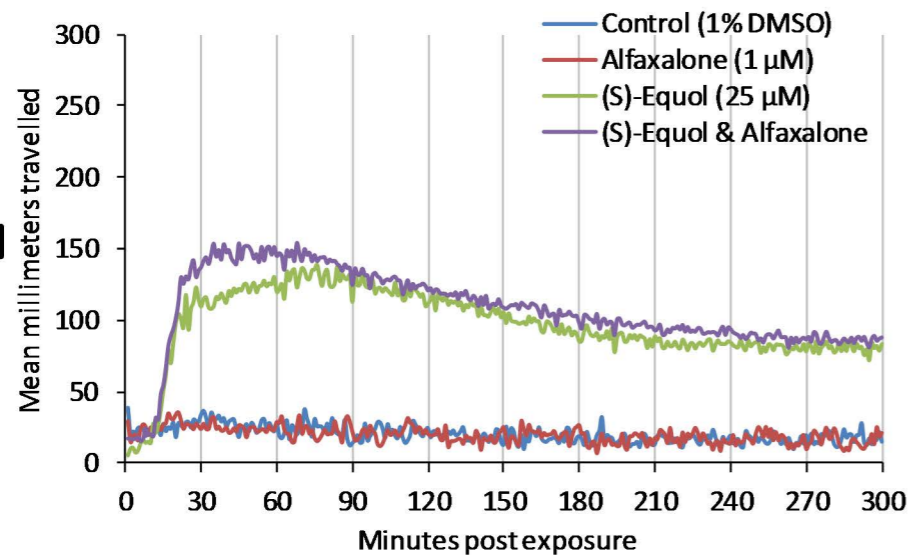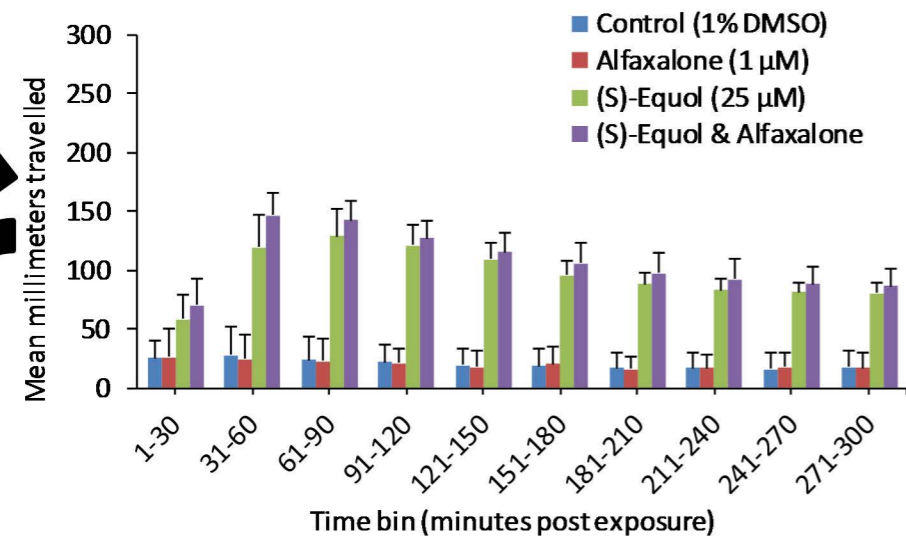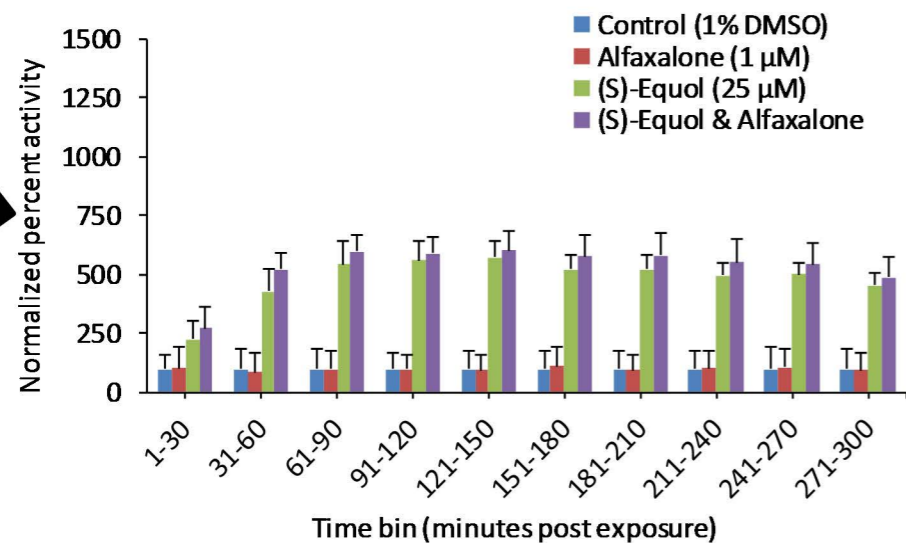

## Normalized percent activity

### Time bin (minutes post exposure)

| Treatment               | 1-30     | 31-60    | 61-90    | 91-120   | 121-150  | 151-180  | 181-210   | 211-240  | 241-270  | 271-300  | N  |
|-------------------------|----------|----------|----------|----------|----------|----------|-----------|----------|----------|----------|----|
| Control (1% DMSO)       | 100 ± 59 | 100 ± 84 | 100 ± 81 | 100 ± 71 | 100 ± 73 | 100 ± 80 | 100 ± 80  | 100 ± 80 | 100 ± 90 | 100 ± 83 | 30 |
| Alfaxalone (1 μM)       | 101 ± 93 | 88 ± 77  | 97 ± 77  | 99 ± 58  | 94 ± 67  | 111 ± 80 | 94 ± 64   | 103 ± 70 | 107 ± 80 | 93 ± 75  | 29 |
| (S)-Equlol (25 μM)      | 227 ± 78 | 427 ± 99 | 542 ± 99 | 559 ± 82 | 571 ± 74 | 521 ± 66 | 522 ± 62  | 496 ± 52 | 500 ± 51 | 455 ± 50 | 31 |
| (S)-Equlol & Alfaxalone | 273 ± 86 | 522 ± 70 | 597 ± 72 | 588 ± 68 | 602 ± 83 | 578 ± 92 | 579 ± 100 | 552 ± 98 | 542 ± 94 | 487 ± 84 | 31 |

Mean ± standard deviation

## Normalized percent activity

### Time bin (minutes post exposure)

| Treatment               | 1-30    | 31-60   | 61-90   | 91-120  | 121-150 | 151-180 | 181-210 | 211-240 | 241-270 | 271-300 |
|-------------------------|---------|---------|---------|---------|---------|---------|---------|---------|---------|---------|
| Control (1% DMSO)       | 78-122  | 69-131  | 70-130  | 74-126  | 73-127  | 71-129  | 71-129  | 71-129  | 67-133  | 70-130  |
| Alfaxalone (1 μM)       | 66-135  | 59-116  | 68-125  | 78-121  | 69-119  | 81-141  | 70-118  | 77-129  | 77-137  | 65-121  |
| (S)-Equlol (25 μM)      | 199-255 | 391-463 | 507-578 | 529-588 | 544-597 | 498-545 | 500-545 | 477-514 | 482-519 | 437-473 |
| (S)-Equlol & Alfaxalone | 242-304 | 497-547 | 571-623 | 563-613 | 572-631 | 545-611 | 544-615 | 517-587 | 508-576 | 457-517 |

95% confidence interval

## p-values

### Time bin (minutes post exposure)

| Treatment                              | 1-30  | 31-60 | 61-90 | 91-120 | 121-150 | 151-180 | 181-210 | 211-240 | 241-270 | 271-300 |
|----------------------------------------|-------|-------|-------|--------|---------|---------|---------|---------|---------|---------|
| Control vs. Alfaxalone                 | 0.598 | 0.570 | 0.962 | 0.999  | 0.974   | 0.899   | 0.999   | 0.998   | 0.838   | 0.975   |
| Control vs. (S)-Equlol                 | 0.001 | 0.001 | 0.001 | 0.001  | 0.001   | 0.001   | 0.001   | 0.001   | 0.001   | 0.001   |
| Control vs. (S)-Equlol & Alfaxalone    | 0.001 | 0.001 | 0.001 | 0.001  | 0.001   | 0.001   | 0.001   | 0.001   | 0.001   | 0.001   |
| Alfaxalone vs. (S)-Equlol              | 0.001 | 0.001 | 0.001 | 0.001  | 0.001   | 0.001   | 0.001   | 0.001   | 0.001   | 0.001   |
| Alfaxalone vs. (S)-Equlol & Alfaxalone | 0.001 | 0.001 | 0.001 | 0.001  | 0.001   | 0.001   | 0.001   | 0.001   | 0.001   | 0.001   |
| (S)-Equlol vs. (S)-Equlol & Alfaxalone | 0.188 | 0.009 | 0.429 | 0.867  | 0.893   | 0.546   | 0.601   | 0.593   | 0.797   | 0.861   |

Two-way repeated measures ANOVA, Tukey's post-hoc, p ≤ 0.05



# CHEMICAL:

# (S)-Equl & Chlormethiazole

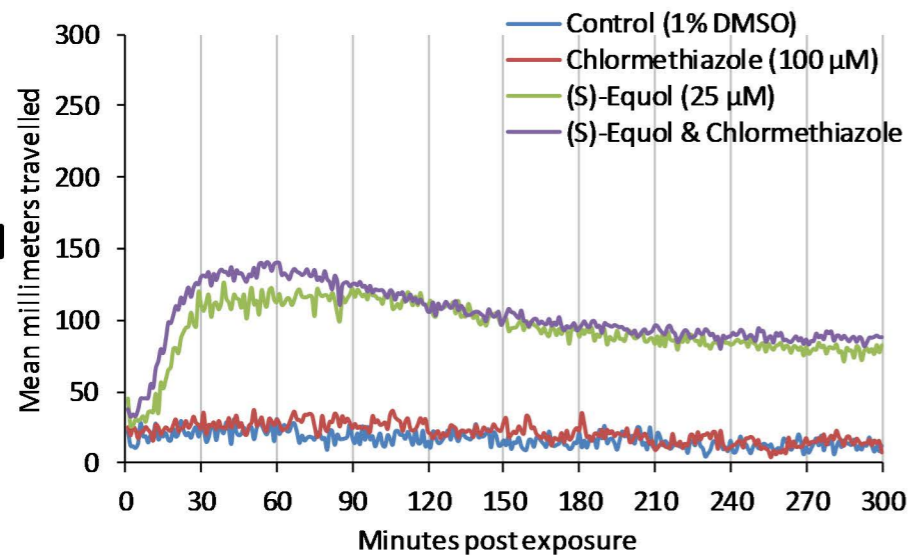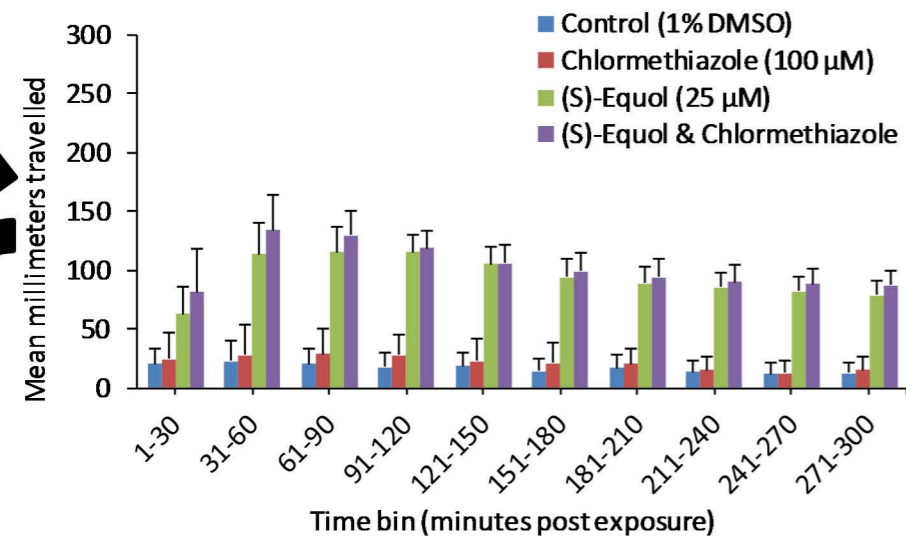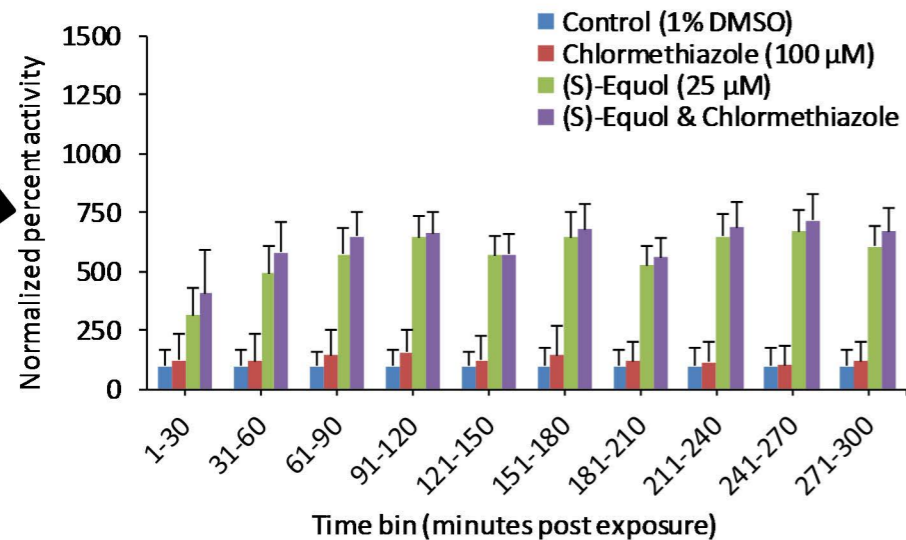

## Normalized percent activity

### Time bin (minutes post exposure)

| Treatment                  | 1-30      | 31-60     | 61-90     | 91-120   | 121-150   | 151-180   | 181-210  | 211-240   | 241-270   | 271-300  | N  |
|----------------------------|-----------|-----------|-----------|----------|-----------|-----------|----------|-----------|-----------|----------|----|
| Control (1% DMSO)          | 100 ± 67  | 100 ± 72  | 100 ± 63  | 100 ± 66 | 100 ± 63  | 100 ± 74  | 100 ± 67 | 100 ± 76  | 100 ± 73  | 100 ± 71 | 27 |
| Chlormethiazole (100 μM)   | 123 ± 113 | 120 ± 113 | 145 ± 104 | 156 ± 99 | 122 ± 103 | 147 ± 122 | 118 ± 85 | 117 ± 87  | 101 ± 83  | 120 ± 83 | 29 |
| (S)-Equl (25 μM)           | 313 ± 120 | 491 ± 118 | 574 ± 111 | 644 ± 87 | 567 ± 81  | 645 ± 111 | 527 ± 85 | 649 ± 95  | 669 ± 96  | 606 ± 89 | 31 |
| (S)-Equl & Chlormethiazole | 408 ± 180 | 580 ± 129 | 648 ± 102 | 664 ± 86 | 574 ± 87  | 680 ± 107 | 559 ± 88 | 685 ± 108 | 718 ± 107 | 669 ± 98 | 31 |

Mean ± standard deviation

## Normalized percent activity

### Time bin (minutes post exposure)

| Treatment                  | 1-30    | 31-60   | 61-90   | 91-120  | 121-150 | 151-180 | 181-210 | 211-240 | 241-270 | 271-300 |
|----------------------------|---------|---------|---------|---------|---------|---------|---------|---------|---------|---------|
| Control (1% DMSO)          | 74-126  | 72-128  | 76-124  | 75-125  | 76-124  | 71-129  | 74-126  | 71-129  | 72-128  | 73-127  |
| Chlormethiazole (100 μM)   | 81-165  | 78-162  | 107-184 | 119-193 | 84-161  | 101-192 | 86-150  | 85-150  | 70-131  | 89-150  |
| (S)-Equl (25 μM)           | 270-356 | 449-533 | 535-614 | 613-676 | 538-596 | 606-685 | 497-557 | 615-683 | 634-703 | 574-638 |
| (S)-Equl & Chlormethiazole | 343-473 | 533-626 | 612-685 | 633-695 | 543-605 | 642-719 | 527-590 | 646-724 | 680-757 | 634-704 |

95% confidence interval

## p-values

### Time bin (minutes post exposure)

| Treatment                                      | 1-30  | 31-60 | 61-90 | 91-120 | 121-150 | 151-180 | 181-210 | 211-240 | 241-270 | 271-300 |
|------------------------------------------------|-------|-------|-------|--------|---------|---------|---------|---------|---------|---------|
| Control vs. Chlormethiazole                    | 0.996 | 0.958 | 0.133 | 0.034  | 0.944   | 0.227   | 0.848   | 0.852   | 0.999   | 0.829   |
| Control vs. (S)-Equl                           | 0.001 | 0.001 | 0.001 | 0.001  | 0.001   | 0.001   | 0.001   | 0.001   | 0.001   | 0.001   |
| Control vs. (S)-Equl & Chlormethiazole         | 0.001 | 0.001 | 0.001 | 0.001  | 0.001   | 0.001   | 0.001   | 0.001   | 0.001   | 0.001   |
| Chlormethiazole vs. (S)-Equl                   | 0.001 | 0.001 | 0.001 | 0.001  | 0.001   | 0.001   | 0.001   | 0.001   | 0.001   | 0.001   |
| Chlormethiazole vs. (S)-Equl & Chlormethiazole | 0.001 | 0.001 | 0.001 | 0.001  | 0.001   | 0.001   | 0.001   | 0.001   | 0.001   | 0.001   |
| (S)-Equl vs. (S)-Equl & Chlormethiazole        | 0.026 | 0.058 | 0.244 | 0.974  | 0.998   | 0.892   | 0.863   | 0.903   | 0.798   | 0.586   |

Two-way repeated measures ANOVA, Tukey's post-hoc,  $p \leq 0.05$

# CHEMICAL: Kaempferol & Alfaxalone

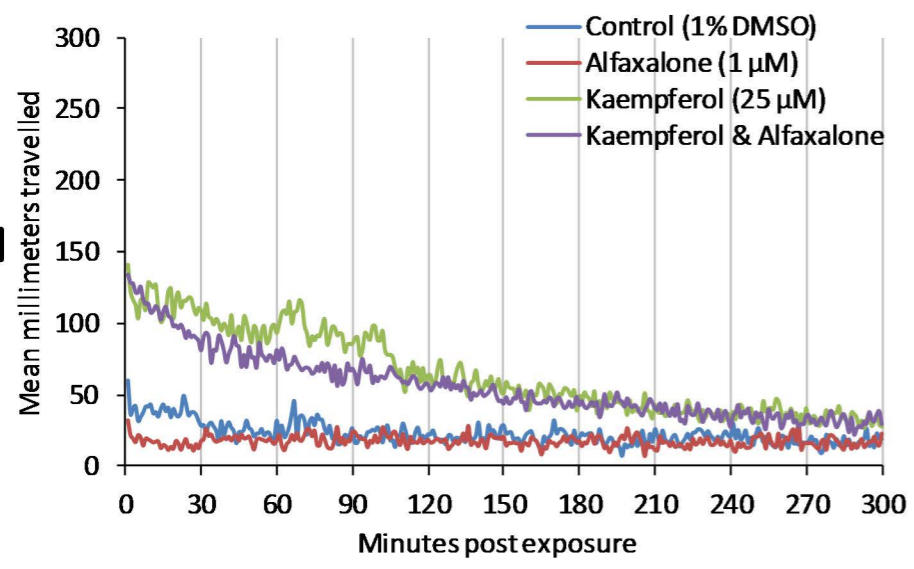

**Normalized percent activity**

| Treatment               | Time bin (minutes post exposure) |           |           |           |           |           |           |           |           |           | N  |
|-------------------------|----------------------------------|-----------|-----------|-----------|-----------|-----------|-----------|-----------|-----------|-----------|----|
|                         | 1-30                             | 31-60     | 61-90     | 91-120    | 121-150   | 151-180   | 181-210   | 211-240   | 241-270   | 271-300   |    |
| Control (1% DMSO)       | 100 ± 56                         | 100 ± 69  | 100 ± 69  | 100 ± 75  | 100 ± 78  | 100 ± 72  | 100 ± 68  | 100 ± 61  | 100 ± 61  | 100 ± 57  | 32 |
| Alfaxalone (1 μM)       | 41 ± 33                          | 74 ± 57   | 69 ± 48   | 86 ± 55   | 82 ± 61   | 75 ± 59   | 90 ± 72   | 74 ± 69   | 89 ± 70   | 93 ± 71   | 32 |
| Kaempferol (25 μM)      | 296 ± 119                        | 383 ± 194 | 360 ± 208 | 351 ± 212 | 278 ± 140 | 243 ± 133 | 238 ± 139 | 178 ± 110 | 197 ± 117 | 193 ± 117 | 32 |
| Kaempferol & Alfaxalone | 271 ± 98                         | 319 ± 132 | 256 ± 97  | 287 ± 120 | 250 ± 95  | 219 ± 83  | 237 ± 93  | 178 ± 84  | 181 ± 80  | 187 ± 87  | 32 |

Mean ± standard deviation

**Normalized percent activity**

| Treatment               | Time bin (minutes post exposure) |         |         |         |         |         |         |         |         |         |
|-------------------------|----------------------------------|---------|---------|---------|---------|---------|---------|---------|---------|---------|
|                         | 1-30                             | 31-60   | 61-90   | 91-120  | 121-150 | 151-180 | 181-210 | 211-240 | 241-270 | 271-300 |
| Control (1% DMSO)       | 80-120                           | 76-124  | 75-125  | 73-127  | 72-128  | 74-126  | 76-124  | 78-122  | 78-122  | 80-120  |
| Alfaxalone (1 μM)       | 29-53                            | 53-94   | 52-86   | 66-105  | 60-103  | 54-96   | 65-116  | 50-99   | 64-114  | 68-118  |
| Kaempferol (25 μM)      | 254-338                          | 314-451 | 286-433 | 276-426 | 229-328 | 196-290 | 189-287 | 139-217 | 155-238 | 151-234 |
| Kaempferol & Alfaxalone | 236-306                          | 272-365 | 222-290 | 245-330 | 217-284 | 189-248 | 204-269 | 148-208 | 153-209 | 156-218 |

95% confidence interval

**p-values**

| Treatment                              | Time bin (minutes post exposure) |       |       |        |         |         |         |         |         |         |
|----------------------------------------|----------------------------------|-------|-------|--------|---------|---------|---------|---------|---------|---------|
|                                        | 1-30                             | 31-60 | 61-90 | 91-120 | 121-150 | 151-180 | 181-210 | 211-240 | 241-270 | 271-300 |
| Control vs. Alfaxalone                 | 0.001                            | 0.218 | 0.192 | 0.920  | 0.757   | 0.470   | 0.928   | 0.071   | 0.876   | 0.877   |
| Control vs. Kaempferol                 | 0.001                            | 0.001 | 0.001 | 0.001  | 0.001   | 0.001   | 0.001   | 0.013   | 0.001   | 0.003   |
| Control vs. Kaempferol & Alfaxalone    | 0.001                            | 0.001 | 0.001 | 0.001  | 0.001   | 0.001   | 0.001   | 0.002   | 0.001   | 0.001   |
| Alfaxalone vs. Kaempferol              | 0.001                            | 0.001 | 0.001 | 0.001  | 0.001   | 0.001   | 0.001   | 0.001   | 0.001   | 0.001   |
| Alfaxalone vs. Kaempferol & Alfaxalone | 0.001                            | 0.001 | 0.001 | 0.001  | 0.001   | 0.001   | 0.001   | 0.001   | 0.001   | 0.001   |
| Kaempferol vs. Kaempferol & Alfaxalone | 0.903                            | 0.660 | 0.197 | 0.743  | 0.980   | 0.997   | 0.882   | 0.942   | 1.000   | 0.998   |

Two-way repeated measures ANOVA, Tukey's post-hoc, p ≤ 0.05

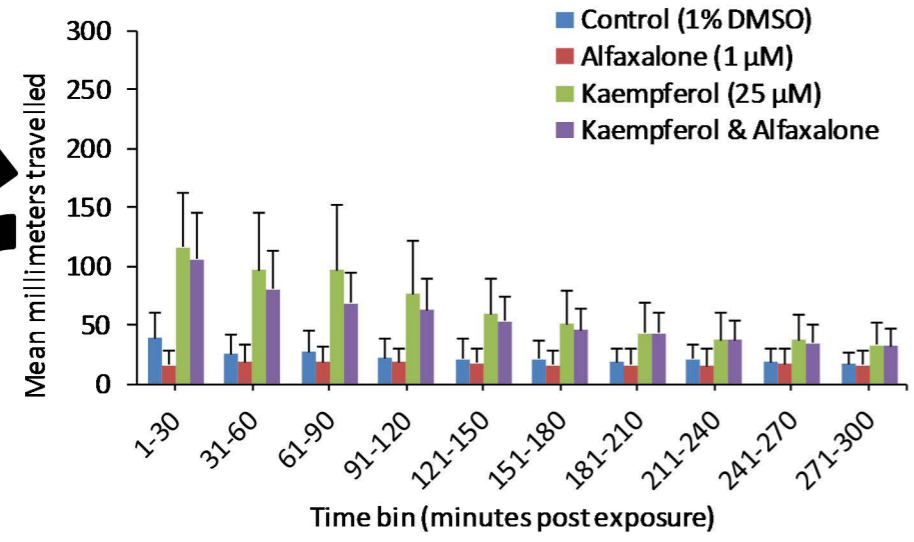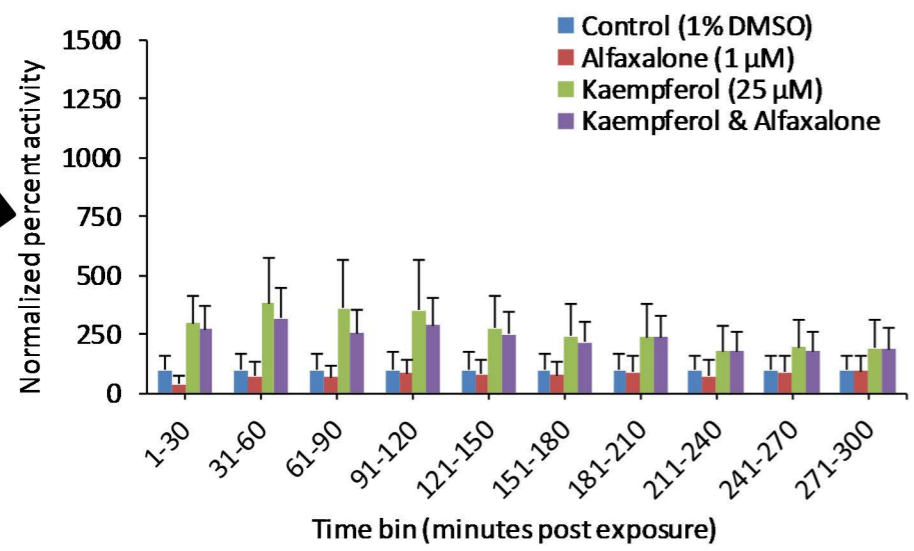

# CHEMICAL:

# Kaempferol & Chlormethiazole

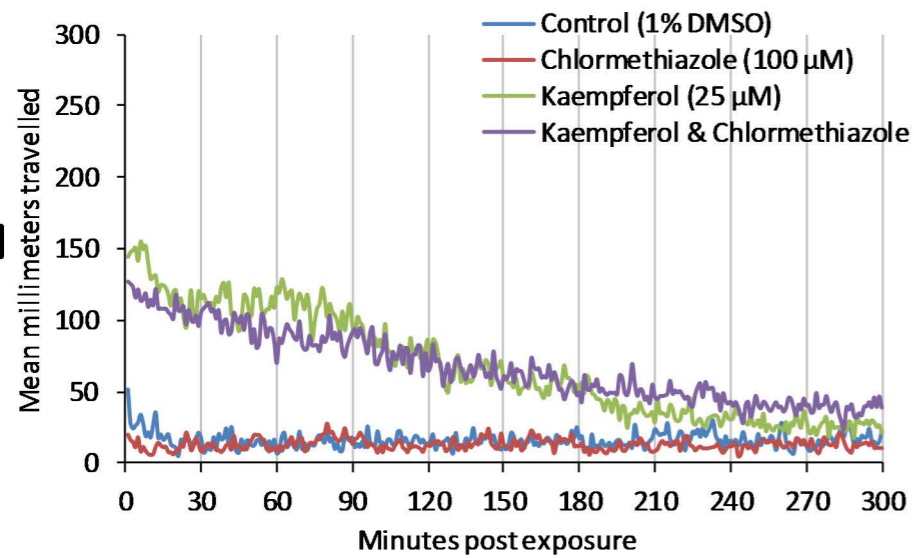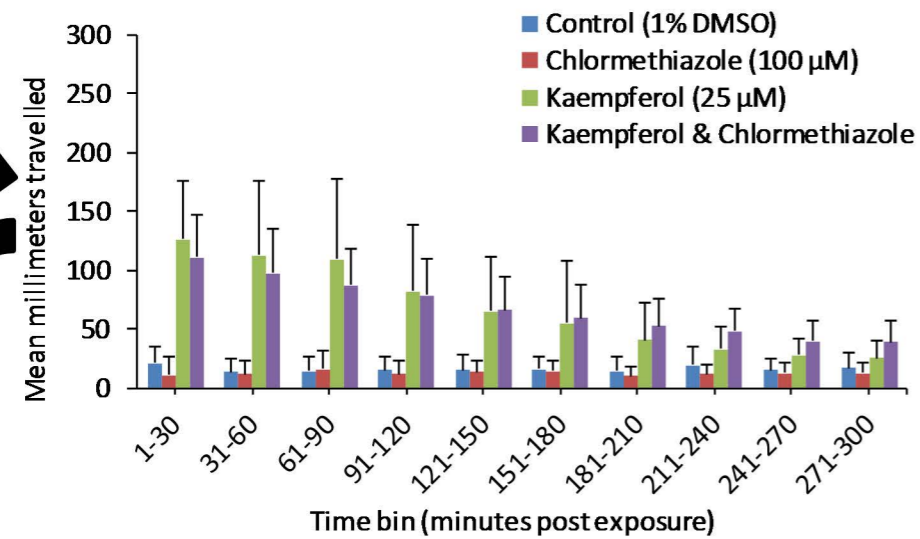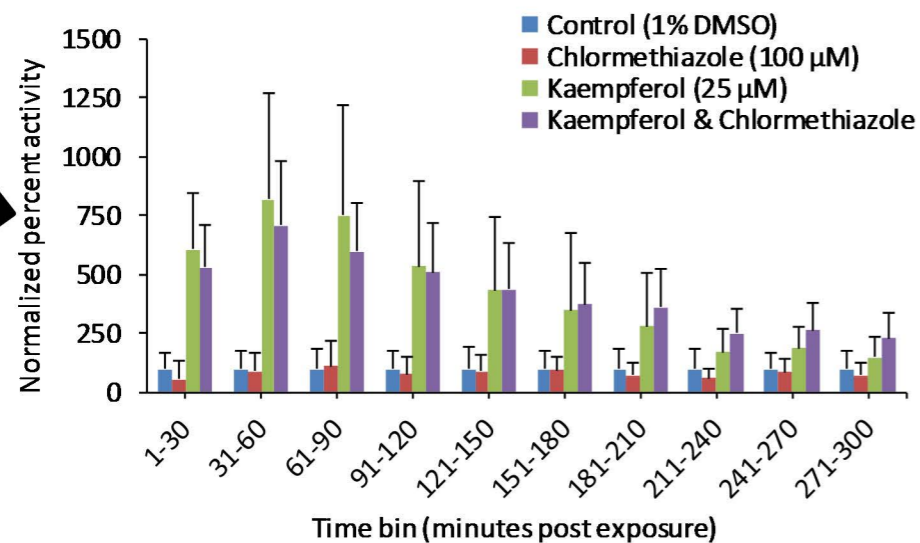

## Normalized percent activity

### Time bin (minutes post exposure)

| Treatment                    | 1-30      | 31-60     | 61-90     | 91-120    | 121-150   | 151-180   | 181-210   | 211-240   | 241-270   | 271-300   | N  |
|------------------------------|-----------|-----------|-----------|-----------|-----------|-----------|-----------|-----------|-----------|-----------|----|
| Control (1% DMSO)            | 100 ± 67  | 100 ± 77  | 100 ± 83  | 100 ± 78  | 100 ± 90  | 100 ± 73  | 100 ± 84  | 100 ± 86  | 100 ± 70  | 100 ± 76  | 28 |
| Chlormethiazole (100 μM)     | 54 ± 78   | 89 ± 83   | 111 ± 110 | 78 ± 75   | 91 ± 68   | 92 ± 59   | 72 ± 57   | 62 ± 42   | 84 ± 59   | 74 ± 55   | 30 |
| Kaempferol (25 μM)           | 605 ± 239 | 816 ± 454 | 750 ± 469 | 534 ± 363 | 434 ± 309 | 346 ± 333 | 281 ± 225 | 171 ± 102 | 188 ± 94  | 150 ± 88  | 29 |
| Kaempferol & Chlormethiazole | 531 ± 179 | 707 ± 274 | 600 ± 207 | 511 ± 206 | 438 ± 193 | 375 ± 172 | 362 ± 164 | 251 ± 100 | 264 ± 114 | 228 ± 108 | 28 |

Mean ± standard deviation

## Normalized percent activity

### Time bin (minutes post exposure)

| Treatment                    | 1-30    | 31-60   | 61-90   | 91-120  | 121-150 | 151-180 | 181-210 | 211-240 | 241-270 | 271-300 |
|------------------------------|---------|---------|---------|---------|---------|---------|---------|---------|---------|---------|
| Control (1% DMSO)            | 75-125  | 71-129  | 69-131  | 70-130  | 66-134  | 72-128  | 68-132  | 67-133  | 73-127  | 71-129  |
| Chlormethiazole (100 μM)     | 26-83   | 59-119  | 70-151  | 51-106  | 66-116  | 71-114  | 51-93   | 47-77   | 62-105  | 53-94   |
| Kaempferol (25 μM)           | 517-694 | 648-985 | 576-925 | 399-669 | 319-548 | 222-470 | 198-365 | 133-208 | 153-222 | 117-183 |
| Kaempferol & Chlormethiazole | 464-599 | 603-810 | 521-678 | 433-588 | 366-511 | 310-440 | 300-425 | 213-289 | 221-307 | 188-269 |

95% confidence interval

## p-values

### Time bin (minutes post exposure)

| Treatment                                        | 1-30  | 31-60 | 61-90 | 91-120 | 121-150 | 151-180 | 181-210 | 211-240 | 241-270 | 271-300 |
|--------------------------------------------------|-------|-------|-------|--------|---------|---------|---------|---------|---------|---------|
| Control vs. Chlormethiazole                      | 0.001 | 0.629 | 0.999 | 0.302  | 0.947   | 0.922   | 0.508   | 0.226   | 0.851   | 0.677   |
| Control vs. Kaempferol                           | 0.001 | 0.001 | 0.001 | 0.001  | 0.001   | 0.001   | 0.001   | 0.011   | 0.004   | 0.076   |
| Control vs. Kaempferol & Chlormethiazole         | 0.001 | 0.001 | 0.001 | 0.001  | 0.001   | 0.001   | 0.001   | 0.001   | 0.001   | 0.001   |
| Chlormethiazole vs. Kaempferol                   | 0.001 | 0.001 | 0.001 | 0.001  | 0.001   | 0.001   | 0.001   | 0.001   | 0.001   | 0.002   |
| Chlormethiazole vs. Kaempferol & Chlormethiazole | 0.001 | 0.001 | 0.001 | 0.001  | 0.001   | 0.001   | 0.001   | 0.001   | 0.001   | 0.001   |
| Kaempferol vs. Kaempferol & Chlormethiazole      | 0.895 | 0.963 | 0.884 | 0.937  | 0.883   | 0.375   | 0.130   | 0.023   | 0.113   | 0.030   |

Two-way repeated measures ANOVA, Tukey's post-hoc, p ≤ 0.05
